# Supplementary material for: The oxidization potential of AA steps in single strand DNA oligomers
Source: Royal Society of Chemistry journal article supplement (doi:10.1039/c4ra09270h), 2014-09-15
Supplement: c4ra09270h1.pdf [file c4ra09270h1.pdf]

## The Oxidization Potential of AA steps in single strand DNA Oligomers

– Electronic Supplementary Information –

A. Capobianco, and A. Peluso\*  
Dipartimento di Chimica e Biologia, Università di Salerno  
I-84084, Fisciano, (SA) Italy. \*Email: apeluso@unisa.it

**TABLE S1.** Sum of the Mulliken spin densities<sup>(a)</sup> (PCM/M06-2X/6-31G\*\*) for the singly ionized trimers (H model).

|                    | 5'-CCA-3' | 5'-ACC-3' | 5'-CAA-3' | 5'-AAC-3' |
|--------------------|-----------|-----------|-----------|-----------|
| 5'-B <sub>1</sub>  | 0.00      | 0.94      | 0.05      | 0.08      |
| B <sub>2</sub>     | 0.02      | 0.06      | 0.87      | 0.85      |
| B <sub>3</sub> -3' | 0.98      | 0.00      | 0.08      | 0.07      |

<sup>(a)</sup>The sum has been carried out only for the atoms belonging to each nucleobase B<sub>*i*</sub>, (*i* = 1,2,3) without including ribose and phosphate atoms.

**TABLE S2.** Sum of the Mulliken spin densities<sup>(a)</sup> (PCM/M06-2X/6-31G\*\*) for the singly ionized trimers (PO- model).

|                    | 5'-CCA-3' | 5'-ACC-3' | 5'-CAA-3' | 5'-AAC-3' |
|--------------------|-----------|-----------|-----------|-----------|
| 5'-B <sub>1</sub>  | 0.00      | 0.94      | 0.05      | 0.07      |
| B <sub>2</sub>     | 0.03      | 0.05      | 0.93      | 0.91      |
| B <sub>3</sub> -3' | 0.97      | 0.00      | 0.01      | 0.02      |

<sup>(a)</sup>The sum has been carried out only for the atoms belonging to each nucleobase B<sub>*i*</sub>.

**TABLE S3.** Sum of the Mulliken spin densities<sup>(a)</sup> (PCM/B3LYP-D/6-31G\*\*) for the singly ionized trimers (H model).

|                    | 5'-CCA-3' | 5'-ACC-3' | 5'-CAA-3' | 5'-AAC-3' |
|--------------------|-----------|-----------|-----------|-----------|
| 5'-B <sub>1</sub>  | 0.00      | 0.81      | 0.02      | 0.37      |
| B <sub>2</sub>     | 0.36      | 0.18      | 0.55      | 0.56      |
| B <sub>3</sub> -3' | 0.63      | 0.00      | 0.43      | 0.07      |

<sup>(a)</sup>The sum has been carried out only for the atoms belonging to each nucleobase B<sub>*i*</sub>.

**TABLE S4.** Sum of the Mulliken spin densities<sup>(a)</sup> (PCM/B3LYP-D/6-31G\*\*) for the singly ionized trimers (PO- model).

|                    | 5'-CCA-3' | 5'-ACC-3' | 5'-CAA-3' | 5'-AAC-3' |
|--------------------|-----------|-----------|-----------|-----------|
| 5'-B <sub>1</sub>  | 0.03      | 0.79      | 0.16      | 0.36      |
| B <sub>2</sub>     | 0.39      | 0.19      | 0.76      | 0.56      |
| B <sub>3</sub> -3' | 0.57      | 0.02      | 0.07      | 0.08      |

<sup>(a)</sup>The sum has been carried out only for the atoms belonging to each nucleobase B<sub>*i*</sub>.

**TABLE S5.** Mulliken charges of neutral and singly ionized 5'-ACC-3' single strand evaluated by using the M06-2X functional. See scheme SI for the definition of the fragments.

|                  | A1    | dR1   | P12   | (H/Na)12 | dR2  | C2    | P23   | (H/Na)13 | dR3  | C3    |
|------------------|-------|-------|-------|----------|------|-------|-------|----------|------|-------|
| <b>H model</b>   |       |       |       |          |      |       |       |          |      |       |
| neut.            | -0.27 | 0.01  | -0.48 | 0.40     | 0.33 | -0.24 | -0.47 | 0.40     | 0.60 | -0.28 |
| sing. ion.       | 0.53  | 0.09  | -0.47 | 0.40     | 0.34 | -0.16 | -0.47 | 0.40     | 0.61 | -0.27 |
| <b>Na model</b>  |       |       |       |          |      |       |       |          |      |       |
| neut.            | -0.28 | -0.05 | -0.67 | 0.72     | 0.21 | -0.26 | -0.66 | 0.72     | 0.54 | -0.27 |
| sing. ion.       | 0.51  | 0.02  | -0.67 | 0.73     | 0.23 | -0.16 | -0.65 | 0.72     | 0.54 | -0.27 |
| <b>PO- model</b> |       |       |       |          |      |       |       |          |      |       |
| neut.            | -0.28 | -0.10 | -0.84 | –        | 0.15 | -0.29 | -0.84 | –        | 0.51 | -0.30 |
| sing. ion.       | 0.53  | 0.00  | -0.84 | –        | 0.17 | -0.21 | -0.84 | –        | 0.49 | -0.29 |

**TABLE S6.** Mulliken charges of neutral and singly ionized 5'-AAC-3' single strand evaluated by using the M06-2X functional. See scheme SI for the definition of the fragments.

|                  | A1    | dR1   | P12   | (H/Na)12 | dR2  | A2    | P23   | (H/Na)13 | dR3  | C3    |
|------------------|-------|-------|-------|----------|------|-------|-------|----------|------|-------|
| <b>H model</b>   |       |       |       |          |      |       |       |          |      |       |
| neut.            | -0.28 | 0.02  | -0.48 | 0.40     | 0.35 | -0.27 | -0.48 | 0.40     | 0.61 | -0.28 |
| sing. ion.       | -0.20 | 0.04  | -0.47 | 0.40     | 0.40 | 0.44  | -0.47 | 0.40     | 0.63 | -0.18 |
| <b>Na model</b>  |       |       |       |          |      |       |       |          |      |       |
| neut.            | -0.28 | -0.03 | -0.67 | 0.72     | 0.23 | -0.30 | -0.65 | 0.72     | 0.55 | -0.27 |
| sing. ion.       | -0.20 | -0.03 | -0.67 | 0.73     | 0.29 | 0.44  | -0.65 | 0.72     | 0.58 | -0.20 |
| <b>PO- model</b> |       |       |       |          |      |       |       |          |      |       |
| neut.            | -0.28 | -0.08 | -0.85 | –        | 0.17 | -0.30 | -0.83 | –        | 0.49 | -0.31 |
| sing. ion.       | -0.22 | -0.07 | -0.83 | –        | 0.24 | 0.44  | -0.81 | –        | 0.52 | -0.26 |

**TABLE S7.** Mulliken charges of neutral and singly ionized 5'-ACC-3' single strand evaluated by using the B3LYP-D functional. See scheme SI for the definition of the fragments.

|                  | A1    | dR1   | P12   | (H/Na)12 | dR2  | C2    | P23   | (H/Na)13 | dR3  | C3    |
|------------------|-------|-------|-------|----------|------|-------|-------|----------|------|-------|
| <b>H model</b>   |       |       |       |          |      |       |       |          |      |       |
| neut.            | -0.26 | 0.02  | -0.45 | 0.37     | 0.32 | -0.24 | -0.44 | 0.37     | 0.57 | -0.27 |
| sing. ion.       | 0.42  | 0.09  | -0.44 | 0.37     | 0.34 | -0.05 | -0.44 | 0.37     | 0.58 | -0.25 |
| <b>Na model</b>  |       |       |       |          |      |       |       |          |      |       |
| neut.            | -0.27 | -0.04 | -0.63 | 0.70     | 0.20 | -0.27 | -0.64 | 0.71     | 0.50 | -0.28 |
| sing. ion.       | 0.41  | 0.02  | -0.62 | 0.71     | 0.22 | -0.07 | -0.64 | 0.71     | 0.51 | -0.26 |
| <b>PO- model</b> |       |       |       |          |      |       |       |          |      |       |
| neut.            | -0.27 | -0.09 | -0.82 | –        | 0.12 | -0.29 | -0.83 | –        | 0.47 | -0.29 |
| sing. ion.       | 0.40  | -0.02 | -0.81 | –        | 0.16 | -0.09 | -0.82 | –        | 0.46 | -0.27 |

**TABLE S8.** Mulliken charges of neutral and singly ionized 5'-AAC-3' single strand evaluated by using the B3LYP-D functional. See scheme SI for the definition of the fragments.

|                  | A1    | dR1   | P12   | (H/Na)12 | dR2  | A2    | P23   | (H/Na)13 | dR3  | C3    |
|------------------|-------|-------|-------|----------|------|-------|-------|----------|------|-------|
| <b>H model</b>   |       |       |       |          |      |       |       |          |      |       |
| neut.            | -0.27 | 0.03  | -0.45 | 0.37     | 0.35 | -0.26 | -0.45 | 0.37     | 0.58 | -0.28 |
| sing. ion.       | 0.06  | 0.07  | -0.45 | 0.37     | 0.37 | 0.20  | -0.44 | 0.37     | 0.61 | -0.17 |
| <b>Na model</b>  |       |       |       |          |      |       |       |          |      |       |
| neut.            | -0.26 | -0.03 | -0.63 | 0.70     | 0.22 | -0.30 | -0.62 | 0.70     | 0.52 | -0.30 |
| sing. ion.       | -0.01 | 0.00  | -0.63 | 0.70     | 0.26 | 0.21  | -0.62 | 0.70     | 0.55 | -0.19 |
| <b>PO- model</b> |       |       |       |          |      |       |       |          |      |       |
| neut.            | -0.26 | -0.08 | -0.83 | –        | 0.16 | -0.30 | -0.81 | –        | 0.44 | -0.31 |
| sing. ion.       | 0.04  | -0.05 | -0.81 | –        | 0.21 | 0.17  | -0.81 | –        | 0.48 | -0.22 |

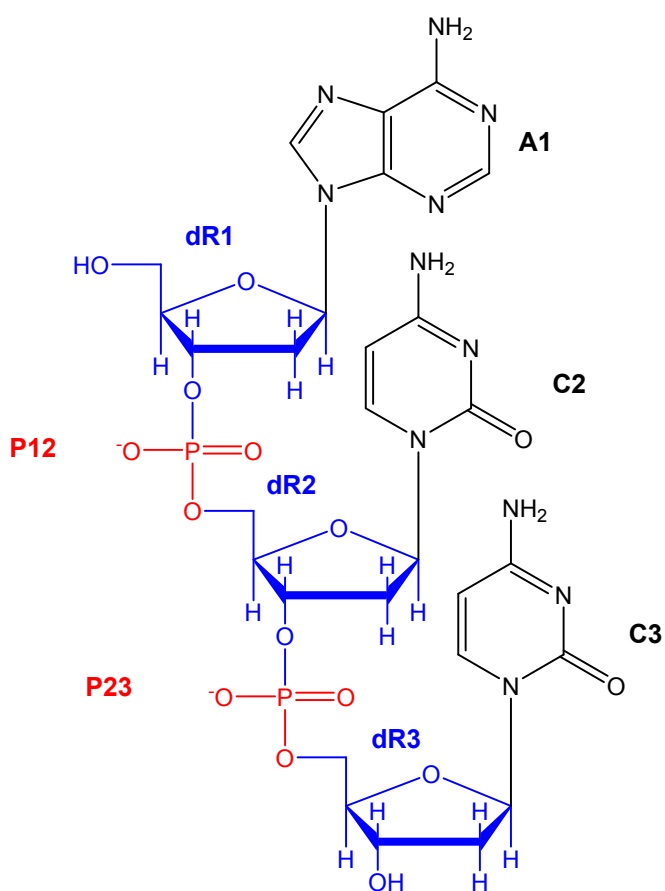

**SCHEME SI**

## Optimized Geometries: local base, helical step and conformational parameters

### 5'-ACC-3' (H model) neutral / B3LYP-D

```

step  overlap area (Å2)
1  A/C  3.88
2  C/C  4.37
*****
Local base step parameters
  step  Shift      Slide      Rise      Tilt      Roll      Twist
1  A/C   0.49      0.26      2.44     13.93     -0.28     34.11
2  C/C   0.32      0.46      2.83      6.43     -2.31     36.88
  ~~~~~
  ave.   0.41      0.36      2.63     10.18     -1.29     35.50
  s.d.   0.12      0.14      0.27      5.30      1.44      1.96
*****
Local base helical parameters
  step  X-disp     Y-disp     h-Rise     Incl.     Tip     h-Twist
1  A/C   0.45      0.70      2.45     -0.45    -22.62    36.77
2  C/C   0.98      0.23      2.81     -3.61    -10.06    37.49
  ~~~~~
  ave.   0.71      0.46      2.63     -2.03    -16.34    37.13
  s.d.   0.38      0.33      0.25      2.23      8.88      0.51
*****
Sugar conformational parameters:
Note: v0: C4'-O4'-C1'-C2';      v1: O4'-C1'-C2'-C3';      v2: C1'-C2'-C3'-C4'
      v3: C2'-C3'-C4'-O4';      v4: C3'-C4'-O4'-C1'
      tm: the amplitude of pucker;  P: the phase angle of pseudorotation
  base  v0      v1      v2      v3      v4      tm      P      Puckering
1  A    -10.6   30.1   -36.9   31.8   -13.3   37.0   182.2   C3'-exo
2  C    -44.3   46.6   -31.5    6.5    23.4   47.1   132.0   C1'-exo
3  C    -45.0   44.6   -27.4    1.9    26.7   46.2   126.4   C1'-exo
*****

```

### 5'-ACC-3' (H model) singly ionized / B3LYP-D

```

step  overlap area (Å2)
1  A/C  3.53
2  C/C  5.19
*****
Local base step parameters
  step  Shift      Slide      Rise      Tilt      Roll      Twist
1  A/C   1.69      1.30      1.63     30.05     -4.22     43.98
2  C/C   0.65      0.72      3.31     -1.38     -1.69     37.79
  ~~~~~
  ave.   1.17      1.01      2.47     14.34     -2.95     40.89
  s.d.   0.74      0.40      1.19     22.23      1.79      4.38
*****
Local base helical parameters
  step  X-disp     Y-disp     h-Rise     Incl.     Tip     h-Twist
1  A/C   1.63     -0.65      2.18     -4.99    -35.57    53.01
2  C/C   1.33     -1.18      3.25     -2.60     2.13    37.85
  ~~~~~
  ave.   1.48     -0.91      2.72     -3.79    -16.72    45.43
  s.d.   0.21      0.38      0.76      1.69     26.66    10.72
*****
Sugar conformational parameters:
  base  v0      v1      v2      v3      v4      tm      P      Puckering
1  A    -9.9   27.1   -32.7   28.0   -11.5   32.7   181.4   C3'-exo
2  C   -44.1   46.7   -32.0    7.3    22.7   47.1   132.8   C1'-exo
3  C   -44.9   45.2   -28.3    2.8    26.0   46.4   127.5   C1'-exo
*****

```

**5'-AAC-3' (H model) neutral / B3LYP-D**step overlap area ( $\text{\AA}^2$ )

1 A/A 5.51

2 A/C 4.14

\*\*\*\*\*

Local base step parameters

| step  | Shift | Slide | Rise | Tilt  | Roll   | Twist |
|-------|-------|-------|------|-------|--------|-------|
| 1 A/A | 2.86  | 1.96  | 2.92 | 17.20 | -11.77 | 50.54 |
| 2 A/C | 0.62  | 0.01  | 2.79 | 5.64  | 3.87   | 35.79 |
| ~~~~~ |       |       |      |       |        |       |
| ave.  | 1.74  | 0.98  | 2.86 | 11.42 | -3.95  | 43.17 |
| s.d.  | 1.58  | 1.38  | 0.09 | 8.17  | 11.06  | 10.43 |

\*\*\*\*\*

Local base helical parameters

| step  | X-disp | Y-disp | h-Rise | Incl.  | Tip    | h-Twist |
|-------|--------|--------|--------|--------|--------|---------|
| 1 A/A | 2.84   | -2.11  | 3.18   | -13.17 | -19.24 | 54.41   |
| 2 A/C | -0.45  | -0.32  | 2.84   | 6.22   | -9.08  | 36.42   |
| ~~~~~ |        |        |        |        |        |         |
| ave.  | 1.19   | -1.21  | 3.01   | -3.47  | -14.16 | 45.42   |
| s.d.  | 2.33   | 1.27   | 0.24   | 13.71  | 7.18   | 12.72   |

\*\*\*\*\*

Sugar conformational parameters:

| base | v0    | v1   | v2    | v3   | v4    | tm   | P     | Puckering |
|------|-------|------|-------|------|-------|------|-------|-----------|
| 1 A  | -10.1 | 27.1 | -32.6 | 27.6 | -11.1 | 32.6 | 180.9 | C3'-exo   |
| 2 A  | -40.9 | 45.8 | -33.5 | 10.7 | 18.7  | 45.5 | 137.5 | C1'-exo   |
| 3 C  | -45.1 | 45.3 | -28.2 | 2.6  | 26.2  | 46.6 | 127.3 | C1'-exo   |

\*\*\*\*\*

**5'-AAC-3' (H model) singly ionized / B3LYP-D**step overlap area ( $\text{\AA}^2$ )

1 A/A 5.27

2 A/C 5.05

\*\*\*\*\*

Local base step parameters

| step  | Shift | Slide | Rise | Tilt | Roll  | Twist |
|-------|-------|-------|------|------|-------|-------|
| 1 A/A | 1.07  | 1.86  | 2.85 | 6.17 | -2.67 | 40.93 |
| 2 A/C | 1.72  | 0.88  | 2.67 | 8.30 | -2.31 | 44.97 |
| ~~~~~ |       |       |      |      |       |       |
| ave.  | 1.39  | 1.37  | 2.76 | 7.24 | -2.49 | 42.95 |
| s.d.  | 0.46  | 0.69  | 0.13 | 1.51 | 0.25  | 2.86  |

\*\*\*\*\*

Local base helical parameters

| step  | X-disp | Y-disp | h-Rise | Incl. | Tip    | h-Twist |
|-------|--------|--------|--------|-------|--------|---------|
| 1 A/A | 2.87   | -0.94  | 2.85   | -3.78 | -8.76  | 41.45   |
| 2 A/C | 1.30   | -1.59  | 2.88   | -2.99 | -10.74 | 45.74   |
| ~~~~~ |        |        |        |       |        |         |
| ave.  | 2.09   | -1.26  | 2.86   | -3.39 | -9.75  | 43.60   |
| s.d.  | 1.11   | 0.46   | 0.02   | 0.56  | 1.40   | 3.03    |

\*\*\*\*\*

Sugar conformational parameters:

| base | v0    | v1   | v2    | v3   | v4    | tm   | P     | Puckering |
|------|-------|------|-------|------|-------|------|-------|-----------|
| 1 A  | -3.2  | 25.0 | -35.9 | 35.1 | -20.1 | 37.0 | 193.7 | C3'-exo   |
| 2 A  | -39.4 | 45.8 | -34.7 | 12.9 | 16.3  | 45.1 | 140.3 | C1'-exo   |
| 3 C  | -45.1 | 44.7 | -27.4 | 1.8  | 26.8  | 46.3 | 126.3 | C1'-exo   |

\*\*\*\*\*

**5'-CCA-3' (H model) neutral / B3LYP-D**

```

step  overlap area (Å2)
1  C/C  4.86
2  C/A  4.60
*****
Local base step parameters
  step  Shift      Slide      Rise      Tilt      Roll      Twist
1  C/C   0.21      0.80      2.15     20.91     -6.05     32.84
2  C/A   0.70      1.09      3.02      3.98      2.25     38.79
  ~~~~~
  ave.   0.45      0.95      2.59     12.44     -1.90     35.81
  s.d.   0.34      0.21      0.62     11.97      5.87      4.21
*****
Local base helical parameters
  step  X-disp     Y-disp     h-Rise     Incl.     Tip     h-Twist
1  C/C   1.67      1.34      1.80     -9.52    -32.87    39.23
2  C/A   1.38     -0.59      3.13      3.38     -5.97    39.05
  ~~~~~
  ave.   1.52      0.38      2.47     -3.07    -19.42    39.14
  s.d.   0.21      1.36      0.94      9.12     19.03      0.13
*****
Sugar conformational parameters:
  base   v0      v1      v2      v3      v4      tm      P      Puckering
1  C    -16.0    31.9    -35.0    26.6    -6.7    35.3    172.3    C2'-endo
2  C    -43.8    46.3    -31.7     7.1    22.7    46.8    132.8    C1'-exo
3  A    -42.4    44.2    -29.3     5.4    22.8    44.7    130.9    C1'-exo
*****

```

**5'-CCA-3' (H model) singly ionized / B3LYP-D**

```

step  overlap area (Å2)
1  C/C  4.55
2  C/A  5.98
*****
Local base step parameters
  step  Shift      Slide      Rise      Tilt      Roll      Twist
1  C/C   0.37      0.97      1.97     23.98     -6.34     36.58
2  C/A   1.06      2.01      2.75      7.25      0.07     41.60
  ~~~~~
  ave.   0.72      1.49      2.36     15.61     -3.14     39.09
  s.d.   0.49      0.74      0.55     11.83      4.53      3.55
*****
Local base helical parameters
  step  X-disp     Y-disp     h-Rise     Incl.     Tip     h-Twist
1  C/C   1.67      0.92      1.71     -8.95    -33.85    43.96
2  C/A   2.79     -0.83      2.89      0.10    -10.12    42.20
  ~~~~~
  ave.   2.23      0.04      2.30     -4.43    -21.98    43.08
  s.d.   0.80      1.24      0.83      6.40     16.78      1.24
*****
Sugar conformational parameters:
  base   v0      v1      v2      v3      v4      tm      P      Puckering
1  C    -15.8    31.7    -34.8    26.5    -6.8    35.1    172.4    C2'-endo
2  C    -43.5    45.7    -30.8     6.5    22.8    46.1    131.9    C1'-exo
3  A    -41.5    44.3    -30.1     7.1    21.1    44.2    132.8    C1'-exo
*****

```

**5'-CAA-3' (H model) neutral / B3LYP-D**step overlap area ( $\text{\AA}^2$ )

1 C/A 4.13  
 2 A/A 5.34

\*\*\*\*\*

Local base step parameters

| step  | Shift | Slide | Rise | Tilt  | Roll  | Twist |
|-------|-------|-------|------|-------|-------|-------|
| 1 C/A | 3.16  | 3.13  | 2.63 | 19.95 | -7.07 | 56.81 |
| 2 A/A | 0.43  | 0.88  | 3.17 | -0.35 | 8.66  | 32.85 |

~~~~~  
 ave. 1.80 2.00 2.90 9.80 0.80 44.83  
 s.d. 1.93 1.60 0.38 14.36 11.13 16.94

\*\*\*\*\*

Local base helical parameters

| step  | X-disp | Y-disp | h-Rise | Incl. | Tip    | h-Twist |
|-------|--------|--------|--------|-------|--------|---------|
| 1 C/A | 3.43   | -2.26  | 3.11   | -7.17 | -20.21 | 60.31   |
| 2 A/A | 0.11   | -0.80  | 3.28   | 15.00 | 0.61   | 33.95   |

~~~~~  
 ave. 1.77 -1.53 3.20 3.91 -9.80 47.13  
 s.d. 2.35 1.03 0.12 15.67 14.72 18.64

\*\*\*\*\*

Sugar conformational parameters:

| base | v0    | v1   | v2    | v3   | v4   | tm   | P     | Puckering |
|------|-------|------|-------|------|------|------|-------|-----------|
| 1 C  | -13.8 | 29.1 | -32.7 | 25.4 | -7.3 | 32.8 | 174.3 | C2'-endo  |
| 2 A  | -37.8 | 43.9 | -33.6 | 12.5 | 15.6 | 43.4 | 140.6 | C1'-exo   |
| 3 A  | -42.4 | 45.2 | -30.6 | 6.8  | 22.0 | 45.3 | 132.5 | C1'-exo   |

\*\*\*\*\*

**5'-CAA-3' (H model) singly ionized / B3LYP-D**step overlap area ( $\text{\AA}^2$ )

1 C/A 4.20  
 2 A/A 5.81

\*\*\*\*\*

Local base step parameters

| step  | Shift | Slide | Rise | Tilt  | Roll  | Twist |
|-------|-------|-------|------|-------|-------|-------|
| 1 C/A | 3.38  | 3.14  | 2.53 | 23.06 | -7.64 | 62.39 |
| 2 A/A | 1.23  | 1.60  | 2.91 | 2.93  | 1.43  | 40.32 |

~~~~~  
 ave. 2.30 2.37 2.72 13.00 -3.10 51.36  
 s.d. 1.52 1.09 0.27 14.24 6.42 15.60

\*\*\*\*\*

Local base helical parameters

| step  | X-disp | Y-disp | h-Rise | Incl. | Tip    | h-Twist |
|-------|--------|--------|--------|-------|--------|---------|
| 1 C/A | 3.14   | -2.25  | 3.12   | -7.10 | -21.42 | 66.50   |
| 2 A/A | 2.17   | -1.48  | 3.04   | 2.07  | -4.24  | 40.45   |

~~~~~  
 ave. 2.65 -1.87 3.08 -2.51 -12.83 53.48  
 s.d. 0.69 0.54 0.05 6.48 12.15 18.42

\*\*\*\*\*

Sugar conformational parameters:

| base | v0    | v1   | v2    | v3   | v4   | tm   | P     | Puckering |
|------|-------|------|-------|------|------|------|-------|-----------|
| 1 C  | -14.5 | 30.3 | -33.7 | 26.1 | -7.4 | 33.9 | 173.8 | C2'-endo  |
| 2 A  | -37.9 | 44.2 | -33.9 | 13.0 | 15.3 | 43.6 | 141.0 | C1'-exo   |
| 3 A  | -40.8 | 45.0 | -31.7 | 9.1  | 19.5 | 44.5 | 135.4 | C1'-exo   |

\*\*\*\*\*

**5'-ACC-3' (Na model) neutral / B3LYP-D**step overlap area (Å<sup>2</sup>)1 A/C 4.01  
2 C/C 2.81

\*\*\*\*\*

Local base step parameters

| step  | Shift | Slide | Rise | Tilt  | Roll | Twist |
|-------|-------|-------|------|-------|------|-------|
| 1 A/C | 0.54  | -0.06 | 2.77 | 6.57  | 0.85 | 35.83 |
| 2 C/C | 0.77  | -0.42 | 3.71 | -8.75 | 9.60 | 45.82 |
| ave.  | 0.66  | -0.24 | 3.24 | -1.09 | 5.22 | 40.82 |
| s.d.  | 0.16  | 0.26  | 0.66 | 10.84 | 6.19 | 7.06  |

\*\*\*\*\*

Local base helical parameters

| step  | X-disp | Y-disp | h-Rise | Incl. | Tip    | h-Twist |
|-------|--------|--------|--------|-------|--------|---------|
| 1 A/C | -0.20  | -0.08  | 2.82   | 1.36  | -10.57 | 36.41   |
| 2 C/C | -1.38  | -1.74  | 3.37   | 12.04 | 10.99  | 47.53   |
| ave.  | -0.79  | -0.91  | 3.10   | 6.70  | 0.21   | 41.97   |
| s.d.  | 0.83   | 1.17   | 0.38   | 7.55  | 15.24  | 7.86    |

\*\*\*\*\*

Sugar conformational parameters:

| base | v0    | v1   | v2    | v3   | v4    | tm   | P     | Puckering |
|------|-------|------|-------|------|-------|------|-------|-----------|
| 1 A  | -12.8 | 32.8 | -39.0 | 32.8 | -12.7 | 39.0 | 180.0 | C2'-endo  |
| 2 C  | -42.5 | 43.6 | -28.2 | 4.1  | 23.9  | 44.5 | 129.4 | C1'-exo   |
| 3 C  | -18.9 | 33.7 | -34.8 | 24.8 | -3.8  | 35.7 | 167.4 | C2'-endo  |

\*\*\*\*\*

**5'-ACC-3' (Na model) singly ionized / B3LYP-D**step overlap area (Å<sup>2</sup>)1 A/C 1.68  
2 C/C 2.64

\*\*\*\*\*

Local base step parameters

| step  | Shift | Slide | Rise | Tilt   | Roll   | Twist |
|-------|-------|-------|------|--------|--------|-------|
| 1 A/C | -1.15 | -0.22 | 2.68 | 9.69   | -19.23 | 25.28 |
| 2 C/C | 1.43  | -0.78 | 4.02 | -13.95 | 9.67   | 50.88 |
| ave.  | 0.14  | -0.50 | 3.35 | -2.13  | -4.78  | 38.08 |
| s.d.  | 1.82  | 0.39  | 0.94 | 16.71  | 20.44  | 18.11 |

\*\*\*\*\*

Local base helical parameters

| step  | X-disp | Y-disp | h-Rise | Incl.  | Tip    | h-Twist |
|-------|--------|--------|--------|--------|--------|---------|
| 1 A/C | 2.19   | 3.32   | 1.86   | -36.60 | -18.44 | 33.09   |
| 2 C/C | -1.57  | -2.61  | 3.36   | 10.92  | 15.74  | 53.46   |
| ave.  | 0.31   | 0.36   | 2.61   | -12.84 | -1.35  | 43.27   |
| s.d.  | 2.66   | 4.19   | 1.06   | 33.60  | 24.17  | 14.40   |

\*\*\*\*\*

Sugar conformational parameters:

| base | v0    | v1   | v2    | v3   | v4    | tm   | P     | Puckering |
|------|-------|------|-------|------|-------|------|-------|-----------|
| 1 A  | -10.6 | 30.2 | -37.0 | 32.1 | -13.6 | 37.1 | 182.4 | C3'-exo   |
| 2 C  | -41.6 | 45.9 | -32.4 | 9.2  | 19.9  | 45.5 | 135.4 | C1'-exo   |
| 3 C  | -17.0 | 32.4 | -34.7 | 25.8 | -5.7  | 35.1 | 170.5 | C2'-endo  |

\*\*\*\*\*



**5'-AAC-3' (Na model) neutral / B3LYP-D**step overlap area (Å<sup>2</sup>)1 A/A 5.01  
2 A/C 4.23

\*\*\*\*\*

Local base step parameters

| step  | Shift | Slide | Rise | Tilt | Roll  | Twist |
|-------|-------|-------|------|------|-------|-------|
| 1 A/A | 0.12  | 1.14  | 3.01 | 2.04 | 11.77 | 27.42 |
| 2 A/C | 0.68  | -0.17 | 2.83 | 5.06 | 5.23  | 37.43 |
| ave.  | 0.40  | 0.48  | 2.92 | 3.55 | 8.50  | 32.43 |
| s.d.  | 0.40  | 0.93  | 0.13 | 2.13 | 4.63  | 7.08  |

\*\*\*\*\*

Local base helical parameters

| step  | X-disp | Y-disp | h-Rise | Incl. | Tip   | h-Twist |
|-------|--------|--------|--------|-------|-------|---------|
| 1 A/A | -0.23  | 0.19   | 3.22   | 23.47 | -4.07 | 29.87   |
| 2 A/C | -0.85  | -0.48  | 2.84   | 8.05  | -7.79 | 38.11   |
| ave.  | -0.54  | -0.15  | 3.03   | 15.76 | -5.93 | 33.99   |
| s.d.  | 0.44   | 0.47   | 0.27   | 10.90 | 2.64  | 5.83    |

\*\*\*\*\*

Sugar conformational parameters:

| base | v0    | v1   | v2    | v3   | v4   | tm   | P     | Puckering |
|------|-------|------|-------|------|------|------|-------|-----------|
| 1 A  | -25.4 | 38.9 | -36.9 | 23.3 | 1.1  | 39.4 | 159.7 | C2'-endo  |
| 2 A  | -34.8 | 44.8 | -37.4 | 18.4 | 10.0 | 44.0 | 148.2 | C2'-endo  |
| 3 C  | -43.4 | 44.6 | -28.7 | 4.2  | 24.2 | 45.3 | 129.3 | C1'-exo   |

\*\*\*\*\*

**5'-AAC-3' (Na model) singly ionized / B3LYP-D**step overlap area (Å<sup>2</sup>)1 A/A 5.30  
2 A/C 5.17

\*\*\*\*\*

Local base step parameters

| step  | Shift | Slide | Rise | Tilt | Roll  | Twist |
|-------|-------|-------|------|------|-------|-------|
| 1 A/A | 1.09  | 1.81  | 2.88 | 5.36 | -2.31 | 41.34 |
| 2 A/C | 1.60  | 0.72  | 2.73 | 7.06 | -1.79 | 44.24 |
| ave.  | 1.34  | 1.26  | 2.81 | 6.21 | -2.05 | 42.79 |
| s.d.  | 0.36  | 0.77  | 0.10 | 1.20 | 0.37  | 2.05  |

\*\*\*\*\*

Local base helical parameters

| step  | X-disp | Y-disp | h-Rise | Incl. | Tip   | h-Twist |
|-------|--------|--------|--------|-------|-------|---------|
| 1 A/A | 2.75   | -1.02  | 2.89   | -3.25 | -7.55 | 41.74   |
| 2 A/C | 1.08   | -1.54  | 2.91   | -2.35 | -9.30 | 44.80   |
| ave.  | 1.92   | -1.28  | 2.90   | -2.80 | -8.43 | 43.27   |
| s.d.  | 1.18   | 0.37   | 0.02   | 0.63  | 1.24  | 2.17    |

\*\*\*\*\*

Sugar conformational parameters:

| base | v0    | v1   | v2    | v3   | v4    | tm   | P     | Puckering |
|------|-------|------|-------|------|-------|------|-------|-----------|
| 1 A  | -5.9  | 27.6 | -37.5 | 35.3 | -18.5 | 38.1 | 190.0 | C3'-exo   |
| 2 A  | -35.4 | 45.8 | -38.3 | 19.1 | 9.8   | 44.9 | 148.6 | C2'-endo  |
| 3 C  | -42.8 | 44.7 | -29.5 | 5.5  | 23.1  | 45.2 | 130.9 | C1'-exo   |

\*\*\*\*\*

**5'-CCA-3' (Na model) neutral / B3LYP-D**step overlap area ( $\text{\AA}^2$ )

1 C/C 2.92

2 C/A 2.33

\*\*\*\*\*

Local base step parameters

| step  | Shift | Slide | Rise | Tilt  | Roll   | Twist |
|-------|-------|-------|------|-------|--------|-------|
| 1 C/C | -0.44 | -0.05 | 2.57 | 11.10 | -12.14 | 30.81 |
| 2 C/A | 0.79  | 0.76  | 3.03 | 2.40  | 0.94   | 49.79 |
| ~~~~~ |       |       |      |       |        |       |
| ave.  | 0.18  | 0.35  | 2.80 | 6.75  | -5.60  | 40.30 |
| s.d.  | 0.87  | 0.57  | 0.33 | 6.15  | 9.25   | 13.42 |

\*\*\*\*\*

Local base helical parameters

| step  | X-disp | Y-disp | h-Rise | Incl.  | Tip    | h-Twist |
|-------|--------|--------|--------|--------|--------|---------|
| 1 C/C | 1.34   | 2.03   | 2.16   | -21.07 | -19.27 | 34.84   |
| 2 C/A | 0.83   | -0.77  | 3.07   | 1.12   | -2.85  | 49.85   |
| ~~~~~ |        |        |        |        |        |         |
| ave.  | 1.09   | 0.63   | 2.62   | -9.97  | -11.06 | 42.35   |
| s.d.  | 0.36   | 1.98   | 0.65   | 15.69  | 11.61  | 10.62   |

\*\*\*\*\*

Sugar conformational parameters:

| base | v0    | v1   | v2    | v3   | v4    | tm   | P     | Puckering |
|------|-------|------|-------|------|-------|------|-------|-----------|
| 1 C  | -17.1 | 34.5 | -37.8 | 29.0 | -7.5  | 38.2 | 172.6 | C2'-endo  |
| 2 C  | -40.0 | 45.8 | -34.0 | 11.6 | 17.5  | 45.2 | 138.8 | C1'-exo   |
| 3 A  | -12.2 | 29.3 | -34.2 | 28.1 | -10.2 | 34.2 | 178.3 | C2'-endo  |

\*\*\*\*\*

**5'-CCA-3' (Na model) singly ionized / B3LYP-D**step overlap area ( $\text{\AA}^2$ )

1 C/C 2.74

2 C/A 4.56

\*\*\*\*\*

Local base step parameters

| step  | Shift | Slide | Rise | Tilt | Roll   | Twist |
|-------|-------|-------|------|------|--------|-------|
| 1 C/C | -0.37 | -0.11 | 2.69 | 8.74 | -17.63 | 32.32 |
| 2 C/A | 1.72  | 1.15  | 2.81 | 8.49 | 7.40   | 57.84 |
| ~~~~~ |       |       |      |      |        |       |
| ave.  | 0.68  | 0.52  | 2.75 | 8.62 | -5.12  | 45.08 |
| s.d.  | 1.48  | 0.89  | 0.08 | 0.17 | 17.70  | 18.05 |

\*\*\*\*\*

Local base helical parameters

| step  | X-disp | Y-disp | h-Rise | Incl.  | Tip    | h-Twist |
|-------|--------|--------|--------|--------|--------|---------|
| 1 C/C | 1.71   | 1.50   | 2.28   | -28.61 | -14.18 | 37.70   |
| 2 C/A | 0.82   | -1.35  | 3.12   | 7.57   | -8.69  | 58.84   |
| ~~~~~ |        |        |        |        |        |         |
| ave.  | 1.26   | 0.08   | 2.70   | -10.52 | -11.43 | 48.27   |
| s.d.  | 0.63   | 2.02   | 0.59   | 25.58  | 3.88   | 14.95   |

Sugar conformational parameters:

| base | v0    | v1   | v2    | v3   | v4    | tm   | P     | Puckering |
|------|-------|------|-------|------|-------|------|-------|-----------|
| 1 C  | -17.9 | 35.4 | -38.5 | 29.2 | -7.2  | 38.9 | 171.9 | C2'-endo  |
| 2 C  | -41.1 | 47.0 | -34.2 | 11.4 | 18.3  | 46.1 | 138.0 | C1'-exo   |
| 3 A  | 10.1  | 10.9 | -26.0 | 32.5 | -27.1 | 32.3 | 216.3 | C4'-endo  |

\*\*\*\*\*

**5'-CAA-3' (Na model) neutral / B3LYP-D**step overlap area (Å<sup>2</sup>)

1 C/A 2.17  
2 A/A 5.06

\*\*\*\*\*

Local base step parameters

| step  | Shift | Slide | Rise | Tilt  | Roll  | Twist |
|-------|-------|-------|------|-------|-------|-------|
| 1 C/A | -0.02 | 0.71  | 2.68 | 11.37 | -9.89 | 35.44 |
| 2 A/A | 1.08  | 0.06  | 3.23 | -3.52 | 8.22  | 49.20 |

~~~~~  
ave. 0.53 0.38 2.96 3.93 -0.83 42.32  
s.d. 0.78 0.46 0.39 10.53 12.81 9.73

\*\*\*\*\*

Local base helical parameters

| step  | X-disp | Y-disp | h-Rise | Incl.  | Tip    | h-Twist |
|-------|--------|--------|--------|--------|--------|---------|
| 1 C/A | 2.06   | 1.15   | 2.30   | -15.42 | -17.73 | 38.42   |
| 2 A/A | -0.52  | -1.53  | 3.12   | 9.78   | 4.18   | 49.96   |

~~~~~  
ave. 0.77 -0.19 2.71 -2.82 -6.77 44.19  
s.d. 1.82 1.90 0.58 17.82 15.49 8.16

\*\*\*\*\*

Sugar conformational parameters:

| base | v0    | v1   | v2    | v3   | v4    | tm   | P     | Puckering |
|------|-------|------|-------|------|-------|------|-------|-----------|
| 1 C  | -17.3 | 34.5 | -37.8 | 28.8 | -7.3  | 38.1 | 172.3 | C2'-endo  |
| 2 A  | -34.0 | 43.4 | -35.8 | 16.9 | 10.6  | 42.6 | 147.2 | C2'-endo  |
| 3 A  | -12.2 | 29.6 | -34.5 | 28.4 | -10.4 | 34.5 | 178.4 | C2'-endo  |

\*\*\*\*\*

**5'-CAA-3' (Na model) singly ionized / B3LYP-D**step overlap area (Å<sup>2</sup>)

1 C/A 0.03  
2 A/A 5.71

\*\*\*\*\*

Local base step parameters

| step  | Shift | Slide | Rise | Tilt  | Roll   | Twist |
|-------|-------|-------|------|-------|--------|-------|
| 1 C/A | -1.79 | 0.30  | 2.24 | 16.43 | -27.56 | 21.40 |
| 2 A/A | 1.66  | -0.12 | 3.03 | -0.17 | 8.60   | 55.09 |

~~~~~  
ave. -0.07 0.09 2.64 8.13 -9.48 38.25  
s.d. 2.44 0.29 0.56 11.74 25.56 23.82

\*\*\*\*\*

Local base helical parameters

| step  | X-disp | Y-disp | h-Rise | Incl.  | Tip    | h-Twist |
|-------|--------|--------|--------|--------|--------|---------|
| 1 C/A | 2.20   | 3.77   | 0.29   | -49.08 | -29.26 | 38.41   |
| 2 A/A | -0.58  | -1.78  | 2.98   | 9.23   | 0.18   | 55.71   |

~~~~~  
ave. 0.81 0.99 1.64 -19.93 -14.54 47.06  
s.d. 1.97 3.92 1.90 41.23 20.82 12.23

\*\*\*\*\*

Sugar conformational parameters:

| base | v0    | v1   | v2    | v3   | v4    | tm   | P     | Puckering |
|------|-------|------|-------|------|-------|------|-------|-----------|
| 1 C  | -15.6 | 32.2 | -35.7 | 27.7 | -7.7  | 35.9 | 173.6 | C2'-endo  |
| 2 A  | -36.2 | 46.1 | -37.3 | 17.6 | 11.3  | 44.7 | 146.5 | C2'-endo  |
| 3 A  | 1.8   | 18.1 | -29.6 | 31.4 | -21.1 | 31.8 | 201.7 | C3'-exo   |

\*\*\*\*\*

**5'-ACC-3' (PO- model) neutral / B3LYP-D**step overlap area ( $\text{\AA}^2$ )

1 A/C 4.04  
 2 C/C 2.09

\*\*\*\*\*

Local base step parameters

| step  | Shift | Slide | Rise | Tilt   | Roll  | Twist |
|-------|-------|-------|------|--------|-------|-------|
| 1 A/C | 0.53  | -0.07 | 2.80 | 5.69   | 2.10  | 35.44 |
| 2 C/C | 1.11  | -0.82 | 4.22 | -16.78 | 13.85 | 49.31 |

~~~~~  
 ave. 0.82 -0.44 3.51 -5.54 7.97 42.38  
 s.d. 0.41 0.53 1.00 15.89 8.31 9.81

\*\*\*\*\*

Local base helical parameters

| step  | X-disp | Y-disp | h-Rise | Incl. | Tip   | h-Twist |
|-------|--------|--------|--------|-------|-------|---------|
| 1 A/C | -0.37  | -0.16  | 2.84   | 3.41  | -9.27 | 35.94   |
| 2 C/C | -1.97  | -2.52  | 3.38   | 15.74 | 19.08 | 53.62   |

~~~~~  
 ave. -1.17 -1.34 3.11 9.58 4.90 44.78  
 s.d. 1.13 1.67 0.38 8.72 20.05 12.50

\*\*\*\*\*

Sugar conformational parameters:

| base | v0    | v1   | v2    | v3   | v4   | tm   | P     | Puckering |
|------|-------|------|-------|------|------|------|-------|-----------|
| 1 A  | -17.2 | 35.7 | -39.4 | 30.7 | -8.6 | 39.6 | 173.6 | C2'-endo  |
| 2 C  | -40.8 | 44.7 | -31.2 | 8.3  | 20.2 | 44.5 | 134.6 | C1'-exo   |
| 3 C  | -14.2 | 30.8 | -34.6 | 27.3 | -8.4 | 34.8 | 175.0 | C2'-endo  |

\*\*\*\*\*

**5'-ACC-3' (PO- model) singly ionized / B3LYP-D**step overlap area ( $\text{\AA}^2$ )

1 A/C 1.72  
 2 C/C 0.78

\*\*\*\*\*

Local base step parameters

| step  | Shift | Slide | Rise | Tilt   | Roll   | Twist |
|-------|-------|-------|------|--------|--------|-------|
| 1 A/C | -1.14 | -0.25 | 2.71 | 8.85   | -18.76 | 25.44 |
| 2 C/C | 1.18  | -1.28 | 4.78 | -26.30 | 16.67  | 49.27 |

~~~~~  
 ave. 0.02 -0.77 3.75 -8.73 -1.05 37.35  
 s.d. 1.64 0.73 1.46 24.86 25.05 16.85

\*\*\*\*\*

Local base helical parameters

| step  | X-disp | Y-disp | h-Rise | Incl.  | Tip    | h-Twist |
|-------|--------|--------|--------|--------|--------|---------|
| 1 A/C | 2.18   | 3.27   | 1.96   | -35.94 | -16.96 | 32.72   |
| 2 C/C | -2.54  | -3.13  | 3.28   | 18.07  | 28.52  | 57.76   |

~~~~~  
 ave. -0.18 0.07 2.62 -8.93 5.78 45.24  
 s.d. 3.34 4.53 0.93 38.19 32.16 17.71

\*\*\*\*\*

Sugar conformational parameters:

| base | v0    | v1   | v2    | v3   | v4    | tm   | P     | Puckering |
|------|-------|------|-------|------|-------|------|-------|-----------|
| 1 A  | -11.1 | 30.7 | -37.2 | 32.0 | -13.3 | 37.3 | 181.7 | C3'-exo   |
| 2 C  | -39.3 | 47.0 | -35.9 | 14.2 | 15.4  | 45.8 | 141.6 | C1'-exo   |
| 3 C  | -10.3 | 27.7 | -33.5 | 28.5 | -11.7 | 33.5 | 181.2 | C3'-exo   |

\*\*\*\*\*

**5'-AAC-3' (PO- model) neutral / B3LYP-D**step overlap area ( $\text{\AA}^2$ )

1 A/A 5.73

2 A/C 4.91

\*\*\*\*\*

Local base step parameters

| step  | Shift | Slide | Rise | Tilt   | Roll  | Twist |
|-------|-------|-------|------|--------|-------|-------|
| 1 A/A | 0.63  | 0.59  | 3.22 | -1.29  | 8.42  | 35.27 |
| 2 A/C | 1.16  | -1.33 | 4.06 | -16.27 | 23.24 | 49.71 |

~~~~~

ave. 0.90 -0.37 3.64 -8.78 15.83 42.49

s.d. 0.38 1.35 0.60 10.60 10.48 10.21

\*\*\*\*\*

Local base helical parameters

| step  | X-disp | Y-disp | h-Rise | Incl. | Tip   | h-Twist |
|-------|--------|--------|--------|-------|-------|---------|
| 1 A/A | -0.24  | -1.19  | 3.24   | 13.65 | 2.09  | 36.26   |
| 2 A/C | -2.86  | -2.25  | 2.77   | 25.41 | 17.79 | 56.79   |

~~~~~

ave. -1.55 -1.72 3.01 19.53 9.94 46.52

s.d. 1.85 0.74 0.33 8.31 11.10 14.52

\*\*\*\*\*

Sugar conformational parameters:

| base | v0    | v1   | v2    | v3   | v4    | tm   | P     | Puckering |
|------|-------|------|-------|------|-------|------|-------|-----------|
| 1 A  | -29.6 | 42.7 | -38.8 | 23.0 | 3.8   | 42.5 | 156.0 | C2'-endo  |
| 2 A  | -33.5 | 45.0 | -38.3 | 19.9 | 8.2   | 44.0 | 150.4 | C2'-endo  |
| 3 C  | -8.4  | 26.1 | -32.9 | 29.0 | -13.2 | 33.0 | 184.3 | C3'-exo   |

\*\*\*\*\*

**5'-AAC-3' (PO- model) singly ionized / B3LYP-D**step overlap area ( $\text{\AA}^2$ )

1 A/A 7.39

2 A/C 5.14

\*\*\*\*\*

Local base step parameters

| step  | Shift | Slide | Rise | Tilt   | Roll  | Twist |
|-------|-------|-------|------|--------|-------|-------|
| 1 A/A | 1.39  | 0.31  | 3.05 | -0.53  | 5.07  | 37.53 |
| 2 A/C | 1.72  | -1.55 | 3.60 | -11.45 | 12.82 | 54.63 |

~~~~~

ave. 1.56 -0.62 3.33 -5.99 8.94 46.08

s.d. 0.23 1.31 0.39 7.72 5.48 12.09

\*\*\*\*\*

Local base helical parameters

| step  | X-disp | Y-disp | h-Rise | Incl. | Tip   | h-Twist |
|-------|--------|--------|--------|-------|-------|---------|
| 1 A/A | -0.14  | -2.21  | 3.05   | 7.83  | 0.82  | 37.87   |
| 2 A/C | -2.33  | -2.44  | 2.82   | 13.59 | 12.14 | 57.07   |

~~~~~

ave. -1.23 -2.32 2.94 10.71 6.48 47.47

s.d. 1.55 0.16 0.16 4.08 8.00 13.58

\*\*\*\*\*

Sugar conformational parameters:

| base | v0    | v1   | v2    | v3   | v4    | tm   | P     | Puckering |
|------|-------|------|-------|------|-------|------|-------|-----------|
| 1 A  | -30.6 | 44.6 | -40.6 | 24.5 | 3.4   | 44.2 | 156.6 | C2'-endo  |
| 2 A  | -37.4 | 47.0 | -37.3 | 17.1 | 12.3  | 45.4 | 145.3 | C2'-endo  |
| 3 C  | -9.8  | 27.0 | -33.0 | 28.2 | -11.8 | 33.0 | 181.8 | C3'-exo   |

\*\*\*\*\*

**5'-CCA-3' (PO- model) neutral / B3LYP-D**step overlap area (Å<sup>2</sup>)

1 C/C 2.60  
2 C/A 2.42

\*\*\*\*\*

Local base step parameters

| step  | Shift | Slide | Rise | Tilt  | Roll   | Twist |
|-------|-------|-------|------|-------|--------|-------|
| 1 C/C | -0.73 | 0.02  | 2.57 | 11.17 | -11.76 | 29.18 |
| 2 C/A | 0.84  | 0.73  | 3.05 | 1.82  | 1.33   | 49.93 |

~~~~~  
ave. 0.06 0.37 2.81 6.49 -5.21 39.56  
s.d. 1.11 0.50 0.33 6.61 9.25 14.67

\*\*\*\*\*

Local base helical parameters

| step  | X-disp | Y-disp | h-Rise | Incl.  | Tip    | h-Twist |
|-------|--------|--------|--------|--------|--------|---------|
| 1 C/C | 1.50   | 2.67   | 2.02   | -21.38 | -20.31 | 33.30   |
| 2 C/A | 0.77   | -0.87  | 3.09   | 1.57   | -2.15  | 49.98   |

~~~~~  
ave. 1.14 0.90 2.56 -9.90 -11.23 41.64  
s.d. 0.52 2.50 0.76 16.23 12.84 11.80

\*\*\*\*\*

Sugar conformational parameters:

| base | v0    | v1   | v2    | v3   | v4    | tm   | P     | Puckering |
|------|-------|------|-------|------|-------|------|-------|-----------|
| 1 C  | -17.2 | 34.3 | -37.4 | 28.5 | -7.2  | 37.7 | 172.2 | C2'-endo  |
| 2 C  | -37.0 | 45.2 | -35.9 | 15.2 | 13.4  | 44.4 | 143.9 | C1'-exo   |
| 3 A  | -10.2 | 28.1 | -34.1 | 29.2 | -12.1 | 34.1 | 181.7 | C3'-exo   |

\*\*\*\*\*

**5'-CCA-3' (PO- model) singly ionized / B3LYP-D**step overlap area (Å<sup>2</sup>)

1 C/C 2.73  
2 C/A 4.52

\*\*\*\*\*

Local base step parameters

| step  | Shift | Slide | Rise | Tilt | Roll   | Twist |
|-------|-------|-------|------|------|--------|-------|
| 1 C/C | -0.38 | -0.08 | 2.72 | 8.22 | -17.58 | 32.61 |
| 2 C/A | 1.70  | 1.14  | 2.83 | 8.14 | 7.74   | 57.77 |

~~~~~  
ave. 0.66 0.53 2.77 8.18 -4.92 45.19  
s.d. 1.47 0.86 0.08 0.05 17.90 17.79

\*\*\*\*\*

Local base helical parameters

| step  | X-disp | Y-disp | h-Rise | Incl.  | Tip    | h-Twist |
|-------|--------|--------|--------|--------|--------|---------|
| 1 C/C | 1.76   | 1.47   | 2.31   | -28.38 | -13.27 | 37.81   |
| 2 C/A | 0.80   | -1.35  | 3.14   | 7.93   | -8.34  | 58.76   |

~~~~~  
ave. 1.28 0.06 2.72 -10.23 -10.80 48.29  
s.d. 0.68 1.99 0.59 25.68 3.49 14.81

\*\*\*\*\*

Sugar conformational parameters:

| base | v0    | v1   | v2    | v3   | v4    | tm   | P     | Puckering |
|------|-------|------|-------|------|-------|------|-------|-----------|
| 1 C  | -18.2 | 35.7 | -38.7 | 29.3 | -7.1  | 39.2 | 171.6 | C2'-endo  |
| 2 C  | -38.5 | 46.9 | -36.4 | 15.1 | 14.4  | 45.7 | 142.9 | C1'-exo   |
| 3 A  | 11.2  | 9.7  | -25.2 | 32.2 | -27.6 | 32.1 | 218.4 | C4'-endo  |

\*\*\*\*\*

**5'-CAA-3' (PO- model) neutral / B3LYP-D**step overlap area (Å<sup>2</sup>)

1 C/A 1.94

2 A/A 4.91

\*\*\*\*\*

Local base step parameters

| step  | Shift | Slide | Rise | Tilt  | Roll  | Twist |
|-------|-------|-------|------|-------|-------|-------|
| 1 C/A | -0.07 | 0.70  | 2.68 | 11.14 | -9.67 | 35.73 |
| 2 A/A | 0.99  | 0.10  | 3.25 | -3.66 | 8.81  | 48.46 |
| ~~~~~ |       |       |      |       |       |       |
| ave.  | 0.46  | 0.40  | 2.97 | 3.74  | -0.43 | 42.10 |
| s.d.  | 0.75  | 0.42  | 0.40 | 10.47 | 13.07 | 9.00  |

\*\*\*\*\*

Local base helical parameters

| step  | X-disp | Y-disp | h-Rise | Incl.  | Tip    | h-Twist |
|-------|--------|--------|--------|--------|--------|---------|
| 1 C/A | 2.01   | 1.20   | 2.30   | -15.00 | -17.28 | 38.57   |
| 2 A/A | -0.53  | -1.45  | 3.15   | 10.62  | 4.41   | 49.34   |
| ~~~~~ |        |        |        |        |        |         |
| ave.  | 0.74   | -0.13  | 2.72   | -2.19  | -6.44  | 43.95   |
| s.d.  | 1.80   | 1.87   | 0.60   | 18.11  | 15.34  | 7.62    |

\*\*\*\*\*

Sugar conformational parameters:

| base | v0    | v1   | v2    | v3   | v4    | tm   | P     | Puckering |
|------|-------|------|-------|------|-------|------|-------|-----------|
| 1 C  | -17.6 | 34.9 | -38.0 | 28.9 | -7.2  | 38.3 | 172.1 | C2'-endo  |
| 2 A  | -30.8 | 42.4 | -37.3 | 20.2 | 6.4   | 42.0 | 152.6 | C2'-endo  |
| 3 A  | -10.2 | 28.1 | -34.2 | 29.3 | -12.2 | 34.2 | 181.7 | C3'-exo   |

\*\*\*\*\*

**5'-CAA-3' (PO- model) singly ionized / B3LYP-D**step overlap area (Å<sup>2</sup>)

1 C/A 0.00

2 A/A 5.75

\*\*\*\*\*

Local base step parameters

| step  | Shift | Slide | Rise | Tilt  | Roll   | Twist |
|-------|-------|-------|------|-------|--------|-------|
| 1 C/A | -1.83 | 0.38  | 2.28 | 15.65 | -28.18 | 21.60 |
| 2 A/A | 1.67  | -0.12 | 3.03 | -0.20 | 9.14   | 54.97 |
| ~~~~~ |       |       |      |       |        |       |
| ave.  | -0.08 | 0.13  | 2.66 | 7.72  | -9.52  | 38.28 |
| s.d.  | 2.48  | 0.35  | 0.53 | 11.21 | 26.39  | 23.60 |

\*\*\*\*\*

Local base helical parameters

| step  | X-disp | Y-disp | h-Rise | Incl.  | Tip    | h-Twist |
|-------|--------|--------|--------|--------|--------|---------|
| 1 C/A | 2.36   | 3.76   | 0.29   | -49.87 | -27.69 | 38.64   |
| 2 A/A | -0.62  | -1.80  | 2.97   | 9.82   | 0.22   | 55.67   |
| ~~~~~ |        |        |        |        |        |         |
| ave.  | 0.87   | 0.98   | 1.63   | -20.02 | -13.74 | 47.15   |
| s.d.  | 2.11   | 3.93   | 1.90   | 42.21  | 19.73  | 12.04   |

\*\*\*\*\*

Sugar conformational parameters:

| base | v0    | v1   | v2    | v3   | v4    | tm   | P     | Puckering |
|------|-------|------|-------|------|-------|------|-------|-----------|
| 1 C  | -15.6 | 32.4 | -35.9 | 27.9 | -7.9  | 36.2 | 173.7 | C2'-endo  |
| 2 A  | -33.3 | 45.7 | -39.3 | 21.4 | 7.0   | 44.6 | 151.9 | C2'-endo  |
| 3 A  | 2.9   | 17.2 | -29.2 | 31.7 | -22.0 | 31.9 | 203.7 | C3'-exo   |

\*\*\*\*\*

**5'-ACC-3' (H model) neutral / M06-2X**step overlap area (Å<sup>2</sup>)

1 A/C 3.90  
2 C/C 3.56

\*\*\*\*\*

Local base step parameters

| step  | Shift | Slide | Rise | Tilt  | Roll  | Twist |
|-------|-------|-------|------|-------|-------|-------|
| 1 A/C | 0.47  | 0.18  | 2.52 | 11.60 | -0.45 | 33.60 |
| 2 C/C | 0.06  | 0.02  | 2.71 | 7.22  | -7.19 | 34.92 |
| ~~~~~ |       |       |      |       |       |       |
| ave.  | 0.26  | 0.10  | 2.62 | 9.41  | -3.82 | 34.26 |
| s.d.  | 0.28  | 0.12  | 0.14 | 3.10  | 4.77  | 0.93  |

\*\*\*\*\*

Local base helical parameters

| step  | X-disp | Y-disp | h-Rise | Incl.  | Tip    | h-Twist |
|-------|--------|--------|--------|--------|--------|---------|
| 1 A/C | 0.35   | 0.59   | 2.54   | -0.75  | -19.36 | 35.50   |
| 2 C/C | 0.87   | 0.74   | 2.62   | -11.67 | -11.73 | 36.33   |
| ~~~~~ |        |        |        |        |        |         |
| ave.  | 0.61   | 0.66   | 2.58   | -6.21  | -15.54 | 35.92   |
| s.d.  | 0.36   | 0.11   | 0.06   | 7.73   | 5.40   | 0.59    |

\*\*\*\*\*

Sugar conformational parameters:

| base | v0    | v1   | v2    | v3   | v4   | tm   | P     | Puckering |
|------|-------|------|-------|------|------|------|-------|-----------|
| 1 A  | -15.2 | 33.4 | -37.9 | 30.3 | -9.5 | 38.0 | 175.7 | C2'-endo  |
| 2 C  | -45.0 | 47.4 | -32.3 | 7.2  | 23.4 | 47.9 | 132.5 | C1'-exo   |
| 3 C  | -46.7 | 44.5 | -25.5 | -1.0 | 29.6 | 47.1 | 122.8 | C1'-exo   |

\*\*\*\*\*

**5'-ACC-3' singly ionized H model / M06-2X**step overlap area (Å<sup>2</sup>)

1 A/C 3.06  
2 C/C 4.60

\*\*\*\*\*

Local base step parameters

| step  | Shift | Slide | Rise | Tilt  | Roll  | Twist |
|-------|-------|-------|------|-------|-------|-------|
| 1 A/C | 1.65  | 1.43  | 1.52 | 32.67 | -5.82 | 43.81 |
| 2 C/C | 0.23  | 0.63  | 3.26 | -0.92 | -2.20 | 34.51 |
| ~~~~~ |       |       |      |       |       |       |
| ave.  | 0.94  | 1.03  | 2.39 | 15.88 | -4.01 | 39.16 |
| s.d.  | 1.00  | 0.56  | 1.22 | 23.75 | 2.56  | 6.57  |

\*\*\*\*\*

Local base helical parameters

| step  | X-disp | Y-disp | h-Rise | Incl. | Tip    | h-Twist |
|-------|--------|--------|--------|-------|--------|---------|
| 1 A/C | 1.78   | -0.58  | 2.04   | -6.77 | -38.02 | 54.46   |
| 2 C/C | 1.40   | -0.52  | 3.20   | -3.70 | 1.54   | 34.59   |
| ~~~~~ |        |        |        |       |        |         |
| ave.  | 1.59   | -0.55  | 2.62   | -5.23 | -18.24 | 44.53   |
| s.d.  | 0.27   | 0.04   | 0.82   | 2.17  | 27.97  | 14.05   |

\*\*\*\*\*

Sugar conformational parameters:

| base | v0    | v1   | v2    | v3   | v4   | tm   | P     | Puckering |
|------|-------|------|-------|------|------|------|-------|-----------|
| 1 A  | -12.2 | 28.1 | -32.1 | 26.1 | -8.8 | 32.1 | 176.9 | C2'-endo  |
| 2 C  | -44.2 | 46.9 | -32.3 | 7.7  | 22.5 | 47.2 | 133.2 | C1'-exo   |
| 3 C  | -46.1 | 45.3 | -27.5 | 1.4  | 27.7 | 47.1 | 125.7 | C1'-exo   |

\*\*\*\*\*



**5'-AAC-3' neutral H model / M06-2X**step overlap area (Å<sup>2</sup>)

1 A/A 5.40  
2 A/C 4.17

\*\*\*\*\*

Local base step parameters

| step  | Shift | Slide | Rise | Tilt  | Roll   | Twist |
|-------|-------|-------|------|-------|--------|-------|
| 1 A/A | 2.78  | 2.10  | 3.01 | 17.61 | -15.86 | 51.36 |
| 2 A/C | 0.61  | 0.01  | 2.73 | 6.72  | 2.99   | 35.08 |

~~~~~  
ave. 1.70 1.05 2.87 12.16 -6.44 43.22  
s.d. 1.53 1.48 0.20 7.70 13.33 11.51

\*\*\*\*\*

Local base helical parameters

| step  | X-disp | Y-disp | h-Rise | Incl.  | Tip    | h-Twist |
|-------|--------|--------|--------|--------|--------|---------|
| 1 A/A | 3.11   | -1.97  | 3.02   | -17.29 | -19.20 | 56.22   |
| 2 A/C | -0.35  | -0.17  | 2.79   | 4.90   | -11.00 | 35.82   |

~~~~~  
ave. 1.38 -1.07 2.91 -6.20 -15.10 46.02  
s.d. 2.45 1.27 0.17 15.69 5.80 14.43

\*\*\*\*\*

Sugar conformational parameters:

| base | v0    | v1   | v2    | v3   | v4   | tm   | P     | Puckering |
|------|-------|------|-------|------|------|------|-------|-----------|
| 1 A  | -12.8 | 29.7 | -34.3 | 27.9 | -9.6 | 34.4 | 177.3 | C2'-endo  |
| 2 A  | -42.1 | 46.6 | -33.8 | 10.5 | 19.5 | 46.3 | 136.8 | C1'-exo   |
| 3 C  | -46.9 | 45.6 | -27.0 | 0.4  | 28.7 | 47.6 | 124.5 | C1'-exo   |

\*\*\*\*\*

**5'-AAC-3' singly ionized H model / M06-2X**step overlap area (Å<sup>2</sup>)

1 A/A 4.98  
2 A/C 5.00

\*\*\*\*\*

Local base step parameters

| step  | Shift | Slide | Rise | Tilt  | Roll  | Twist |
|-------|-------|-------|------|-------|-------|-------|
| 1 A/A | 0.82  | 1.84  | 2.85 | 6.70  | -1.43 | 37.23 |
| 2 A/C | 1.66  | 0.88  | 2.42 | 12.15 | -3.39 | 43.49 |

~~~~~  
ave. 1.24 1.36 2.63 9.43 -2.41 40.36  
s.d. 0.59 0.68 0.30 3.85 1.39 4.42

\*\*\*\*\*

Local base helical parameters

| step  | X-disp | Y-disp | h-Rise | Incl. | Tip    | h-Twist |
|-------|--------|--------|--------|-------|--------|---------|
| 1 A/A | 3.00   | -0.51  | 2.88   | -2.22 | -10.39 | 37.84   |
| 2 A/C | 1.39   | -1.29  | 2.69   | -4.47 | -16.00 | 45.20   |

~~~~~  
ave. 2.20 -0.90 2.79 -3.34 -13.19 41.52  
s.d. 1.14 0.55 0.13 1.59 3.97 5.20

\*\*\*\*\*

Sugar conformational parameters:

| base | v0    | v1   | v2    | v3   | v4    | tm   | P     | Puckering |
|------|-------|------|-------|------|-------|------|-------|-----------|
| 1 A  | -4.0  | 25.2 | -35.5 | 34.3 | -19.1 | 36.3 | 192.5 | C3'-exo   |
| 2 A  | -40.6 | 46.4 | -34.6 | 12.6 | 17.2  | 45.7 | 139.3 | C1'-exo   |
| 3 C  | -47.1 | 44.3 | -24.9 | -1.8 | 30.3  | 47.2 | 121.8 | C1'-exo   |

\*\*\*\*\*

**5'-CCA-3' neutral / H model / M06-2X**step overlap area (Å<sup>2</sup>)

1 C/C 4.98  
 2 C/A 6.87

\*\*\*\*\*

Local base step parameters

| step  | Shift | Slide | Rise | Tilt  | Roll  | Twist |
|-------|-------|-------|------|-------|-------|-------|
| 1 C/C | 0.04  | 0.95  | 2.56 | 10.36 | 2.00  | 29.72 |
| 2 C/A | 1.84  | 0.99  | 2.78 | 8.85  | -2.97 | 44.93 |

~~~~~  
 ave. 0.94 0.97 2.67 9.60 -0.49 37.32  
 s.d. 1.27 0.03 0.16 1.07 3.52 10.76

\*\*\*\*\*

Local base helical parameters

| step  | X-disp | Y-disp | h-Rise | Incl. | Tip    | h-Twist |
|-------|--------|--------|--------|-------|--------|---------|
| 1 C/C | 1.44   | 1.47   | 2.49   | 3.75  | -19.44 | 31.49   |
| 2 C/A | 1.50   | -1.67  | 3.00   | -3.84 | -11.43 | 45.84   |

~~~~~  
 ave. 1.47 -0.10 2.75 -0.04 -15.44 38.67  
 s.d. 0.04 2.22 0.36 5.37 5.66 10.15

\*\*\*\*\*

Sugar conformational parameters:

| base | v0    | v1   | v2    | v3   | v4   | tm   | P     | Puckering |
|------|-------|------|-------|------|------|------|-------|-----------|
| 1 C  | -34.0 | 42.6 | -35.3 | 16.6 | 10.7 | 42.1 | 146.9 | C2'-endo  |
| 2 C  | -43.2 | 47.6 | -34.3 | 10.3 | 20.3 | 47.5 | 136.3 | C1'-exo   |
| 3 A  | -44.9 | 45.0 | -28.1 | 2.9  | 26.0 | 46.2 | 127.4 | C1'-exo   |

\*\*\*\*\*

**5'-CCA-3' singly ionized / H model / M06-2X**step overlap area (Å<sup>2</sup>)

1 C/C 4.90  
 2 C/A 1.41

\*\*\*\*\*

Local base step parameters

| step  | Shift | Slide | Rise | Tilt  | Roll   | Twist |
|-------|-------|-------|------|-------|--------|-------|
| 1 C/C | 0.22  | 0.43  | 2.77 | 6.55  | -1.44  | 32.14 |
| 2 C/A | 0.30  | 0.10  | 2.30 | 13.69 | -11.09 | 38.66 |

~~~~~  
 ave. 0.26 0.26 2.53 10.12 -6.26 35.40  
 s.d. 0.05 0.23 0.33 5.05 6.83 4.61

\*\*\*\*\*

Local base helical parameters

| step  | X-disp | Y-disp | h-Rise | Incl.  | Tip    | h-Twist |
|-------|--------|--------|--------|--------|--------|---------|
| 1 C/C | 0.97   | 0.56   | 2.74   | -2.56  | -11.68 | 32.82   |
| 2 C/A | 0.95   | 0.59   | 2.18   | -15.79 | -19.49 | 42.35   |

~~~~~  
 ave. 0.96 0.58 2.46 -9.18 -15.58 37.58  
 s.d. 0.01 0.02 0.40 9.36 5.53 6.74

\*\*\*\*\*

Sugar conformational parameters:

| base | v0    | v1   | v2    | v3   | v4   | tm   | P     | Puckering |
|------|-------|------|-------|------|------|------|-------|-----------|
| 1 C  | -35.2 | 43.6 | -35.7 | 16.4 | 11.6 | 43.0 | 146.1 | C2'-endo  |
| 2 C  | -45.3 | 48.3 | -33.2 | 8.1  | 23.0 | 48.5 | 133.3 | C1'-exo   |
| 3 A  | -43.9 | 45.6 | -29.6 | 5.3  | 23.7 | 45.9 | 130.2 | C1'-exo   |

\*\*\*\*\*

**5'-CAA-3' neutral / H model / M06-2X**step overlap area (Å<sup>2</sup>)

1 C/A 1.45  
2 A/A 4.68

\*\*\*\*\*  
Local base step parameters

| step  |      | Shift | Slide | Rise | Tilt  | Roll   | Twist |
|-------|------|-------|-------|------|-------|--------|-------|
| 1     | C/A  | -0.59 | 0.49  | 2.48 | 17.64 | -19.41 | 27.27 |
| 2     | A/A  | 1.01  | 0.07  | 3.17 | -2.30 | 5.94   | 51.11 |
| ~~~~~ |      |       |       |      |       |        |       |
|       | ave. | 0.21  | 0.28  | 2.83 | 7.67  | -6.73  | 39.19 |
|       | s.d. | 1.13  | 0.30  | 0.49 | 14.10 | 17.93  | 16.86 |

\*\*\*\*\*  
Local base helical parameters

| step  |      | X-disp | Y-disp | h-Rise | Incl.  | Tip    | h-Twist |
|-------|------|--------|--------|--------|--------|--------|---------|
| 1     | C/A  | 2.47   | 2.47   | 1.29   | -33.05 | -30.04 | 37.66   |
| 2     | A/A  | -0.31  | -1.32  | 3.11   | 6.86   | 2.66   | 51.48   |
| ~~~~~ |      |        |        |        |        |        |         |
|       | ave. | 1.08   | 0.58   | 2.20   | -13.10 | -13.69 | 44.57   |
|       | s.d. | 1.97   | 2.68   | 1.29   | 28.22  | 23.12  | 9.77    |

\*\*\*\*\*  
Sugar conformational parameters:

| base |   | v0    | v1   | v2    | v3   | v4   | tm   | P     | Puckering |
|------|---|-------|------|-------|------|------|------|-------|-----------|
| 1    | C | -18.7 | 33.6 | -35.1 | 25.3 | -4.2 | 35.9 | 168.1 | C2'-endo  |
| 2    | A | -42.3 | 46.5 | -33.2 | 9.7  | 20.1 | 46.2 | 135.8 | C1'-exo   |
| 3    | A | -17.3 | 32.5 | -34.5 | 25.6 | -5.4 | 35.1 | 170.0 | C2'-endo  |

\*\*\*\*\*

**5'-CAA-3' singly ionized H model / M06-2X**step overlap area (Å<sup>2</sup>)

1 C/A 0.00  
2 A/A 3.83

\*\*\*\*\*  
Local base step parameters

| step  |      | Shift | Slide | Rise | Tilt  | Roll   | Twist |
|-------|------|-------|-------|------|-------|--------|-------|
| 1     | C/A  | -1.63 | 0.61  | 1.82 | 29.17 | -30.96 | 25.91 |
| 2     | A/A  | 1.35  | 2.11  | 2.85 | 5.87  | -0.18  | 55.91 |
| ~~~~~ |      |       |       |      |       |        |       |
|       | ave. | -0.14 | 1.36  | 2.33 | 17.52 | -15.57 | 40.91 |
|       | s.d. | 2.10  | 1.06  | 0.73 | 16.47 | 21.76  | 21.22 |

\*\*\*\*\*  
Local base helical parameters

| step  |      | X-disp | Y-disp | h-Rise | Incl.  | Tip    | h-Twist |
|-------|------|--------|--------|--------|--------|--------|---------|
| 1     | C/A  | 1.43   | 2.61   | -0.34  | -43.71 | -41.19 | 49.49   |
| 2     | A/A  | 2.25   | -1.14  | 2.96   | -0.19  | -6.24  | 56.19   |
| ~~~~~ |      |        |        |        |        |        |         |
|       | ave. | 1.84   | 0.73   | 1.31   | -21.95 | -23.72 | 52.84   |
|       | s.d. | 0.58   | 2.65   | 2.33   | 30.77  | 24.71  | 4.74    |

\*\*\*\*\*  
Sugar conformational parameters:

| base |   | v0    | v1   | v2    | v3   | v4   | tm   | P     | Puckering |
|------|---|-------|------|-------|------|------|------|-------|-----------|
| 1    | C | -18.6 | 33.3 | -34.9 | 25.1 | -4.2 | 35.6 | 168.1 | C2'-endo  |
| 2    | A | -39.3 | 46.3 | -35.8 | 14.6 | 15.1 | 45.4 | 141.9 | C1'-exo   |
| 3    | A | -17.7 | 32.7 | -34.4 | 25.3 | -4.9 | 35.0 | 169.2 | C2'-endo  |

\*\*\*\*\*

**5'-ACC-3' (Na model) neutral / M06-2X**step overlap area ( $\text{\AA}^2$ )

1 A/C 3.78  
2 C/C 2.86

\*\*\*\*\*

## Local base step parameters

| step  | Shift | Slide | Rise | Tilt | Roll  | Twist |
|-------|-------|-------|------|------|-------|-------|
| 1 A/C | 0.43  | 0.07  | 2.65 | 9.57 | -0.47 | 34.64 |
| 2 C/C | 0.15  | 0.27  | 2.92 | 3.43 | -7.12 | 42.91 |
| ave.  | 0.29  | 0.17  | 2.78 | 6.50 | -3.80 | 38.78 |
| s.d.  | 0.20  | 0.14  | 0.20 | 4.34 | 4.71  | 5.85  |

\*\*\*\*\*

## Local base helical parameters

| step  | X-disp | Y-disp | h-Rise | Incl. | Tip    | h-Twist |
|-------|--------|--------|--------|-------|--------|---------|
| 1 A/C | 0.16   | 0.44   | 2.67   | -0.77 | -15.70 | 35.90   |
| 2 C/C | 0.97   | 0.09   | 2.85   | -9.64 | -4.64  | 43.60   |
| ave.  | 0.57   | 0.26   | 2.76   | -5.20 | -10.17 | 39.75   |
| s.d.  | 0.57   | 0.24   | 0.13   | 6.27  | 7.82   | 5.45    |

\*\*\*\*\*

## Sugar conformational parameters:

| base | v0    | v1   | v2    | v3   | v4    | tm   | P     | Puckering |
|------|-------|------|-------|------|-------|------|-------|-----------|
| 1 A  | -14.2 | 33.6 | -39.0 | 32.1 | -11.4 | 39.1 | 178.0 | C2'-endo  |
| 2 C  | -42.4 | 48.1 | -35.5 | 12.0 | 18.8  | 47.5 | 138.3 | C1'-exo   |
| 3 C  | -24.0 | 36.5 | -34.5 | 21.7 | 1.3   | 36.9 | 159.3 | C2'-endo  |

\*\*\*\*\*

**5'-ACC-3' (Na model) singly ionized / M06-2X**step overlap area ( $\text{\AA}^2$ )

1 A/C 4.51  
2 C/C 3.32

\*\*\*\*\*

## Local base step parameters

| step  | Shift | Slide | Rise | Tilt  | Roll  | Twist |
|-------|-------|-------|------|-------|-------|-------|
| 1 A/C | 1.44  | 0.98  | 2.16 | 17.73 | -3.77 | 42.02 |
| 2 C/C | 0.27  | 0.59  | 3.04 | 1.87  | -4.68 | 43.08 |
| ave.  | 0.86  | 0.78  | 2.60 | 9.80  | -4.22 | 42.55 |
| s.d.  | 0.83  | 0.28  | 0.63 | 11.22 | 0.65  | 0.75  |

\*\*\*\*\*

## Local base helical parameters

| step  | X-disp | Y-disp | h-Rise | Incl. | Tip    | h-Twist |
|-------|--------|--------|--------|-------|--------|---------|
| 1 A/C | 1.51   | -0.71  | 2.45   | -4.98 | -23.46 | 45.60   |
| 2 C/C | 1.21   | -0.20  | 2.98   | -6.35 | -2.54  | 43.36   |
| ave.  | 1.36   | -0.46  | 2.71   | -5.67 | -13.00 | 44.48   |
| s.d.  | 0.21   | 0.36   | 0.37   | 0.96  | 14.80  | 1.58    |

\*\*\*\*\*

## Sugar conformational parameters:

| base | v0    | v1   | v2    | v3   | v4    | tm   | P     | Puckering |
|------|-------|------|-------|------|-------|------|-------|-----------|
| 1 A  | -8.7  | 30.2 | -38.8 | 35.3 | -16.7 | 39.0 | 186.3 | C3'-exo   |
| 2 C  | -41.0 | 48.1 | -37.0 | 14.6 | 16.2  | 47.3 | 141.5 | C1'-exo   |
| 3 C  | -24.2 | 36.7 | -34.7 | 21.8 | 1.4   | 37.1 | 159.2 | C2'-endo  |

\*\*\*\*\*

**5'-AAC-3' (Na model) neutral / M06-2X**step overlap area (Å<sup>2</sup>)

1 A/A 5.05  
 2 A/C 3.60

\*\*\*\*\*

## Local base step parameters

| step  | Shift | Slide | Rise | Tilt | Roll  | Twist |
|-------|-------|-------|------|------|-------|-------|
| 1 A/A | 0.20  | 1.31  | 2.94 | 3.61 | 10.45 | 26.42 |
| 2 A/C | 0.82  | 0.12  | 2.76 | 6.87 | 1.01  | 44.68 |

~~~~~  
 ave. 0.51 0.72 2.85 5.24 5.73 35.55  
 s.d. 0.44 0.84 0.13 2.30 6.68 12.91

\*\*\*\*\*

## Local base helical parameters

| step  | X-disp | Y-disp | h-Rise | Incl. | Tip   | h-Twist |
|-------|--------|--------|--------|-------|-------|---------|
| 1 A/A | 0.33   | 0.39   | 3.22   | 21.70 | -7.50 | 28.61   |
| 2 A/C | 0.08   | -0.54  | 2.85   | 1.32  | -8.97 | 45.19   |

~~~~~  
 ave. 0.20 -0.07 3.03 11.51 -8.23 36.90  
 s.d. 0.18 0.66 0.26 14.41 1.04 11.72

\*\*\*\*\*

## Sugar conformational parameters:

| base | v0    | v1   | v2    | v3   | v4   | tm   | P     | Puckering |
|------|-------|------|-------|------|------|------|-------|-----------|
| 1 A  | -27.3 | 39.7 | -36.6 | 22.1 | 3.0  | 39.8 | 157.0 | C2'-endo  |
| 2 A  | -36.3 | 45.6 | -37.2 | 17.6 | 11.5 | 44.7 | 146.5 | C2'-endo  |
| 3 C  | -25.6 | 37.6 | -34.7 | 21.0 | 2.7  | 37.7 | 157.3 | C2'-endo  |

\*\*\*\*\*

**5'-AAC-3' (Na model) singly ionized / M06-2X**step overlap area (Å<sup>2</sup>)

1 A/A 5.43  
 2 A/C 5.31

\*\*\*\*\*

## Local base step parameters

| step  | Shift | Slide | Rise | Tilt  | Roll  | Twist |
|-------|-------|-------|------|-------|-------|-------|
| 1 A/A | 0.86  | 1.58  | 2.88 | 4.85  | 2.12  | 35.70 |
| 2 A/C | 1.53  | 0.55  | 2.44 | 12.07 | -2.15 | 42.49 |

~~~~~  
 ave. 1.20 1.06 2.66 8.46 -0.02 39.10  
 s.d. 0.48 0.72 0.31 5.11 3.02 4.80

\*\*\*\*\*

## Sugar conformational parameters:

| base | v0    | v1   | v2    | v3   | v4   | tm   | P     | Puckering |
|------|-------|------|-------|------|------|------|-------|-----------|
| 1 A  | -21.8 | 37.5 | -38.2 | 27.0 | -3.5 | 39.4 | 166.2 | C2'-endo  |
| 2 A  | -37.7 | 47.0 | -38.0 | 17.8 | 12.0 | 45.8 | 146.0 | C2'-endo  |
| 3 C  | -45.2 | 45.7 | -28.8 | 3.6  | 25.7 | 46.7 | 128.1 | C1'-exo   |

\*\*\*\*\*

**5'-CCA-3' (Na model) neutral / M06-2X**step overlap area (Å<sup>2</sup>)

1 C/C 1.89  
 2 C/A 1.50

\*\*\*\*\*

Local base step parameters

| step |     | Shift | Slide | Rise | Tilt  | Roll   | Twist |
|------|-----|-------|-------|------|-------|--------|-------|
| 1    | C/C | -0.84 | -0.37 | 2.33 | 13.77 | -16.10 | 26.71 |
| 2    | C/A | 0.68  | 0.54  | 2.95 | 1.98  | -3.62  | 50.16 |

~~~~~  
 ave. -0.08 0.08 2.64 7.87 -9.86 38.43  
 s.d. 1.07 0.65 0.44 8.34 8.82 16.58

\*\*\*\*\*

Local base helical parameters

| step |     | X-disp | Y-disp | h-Rise | Incl.  | Tip    | h-Twist |
|------|-----|--------|--------|--------|--------|--------|---------|
| 1    | C/C | 1.14   | 2.97   | 1.68   | -29.63 | -25.34 | 33.97   |
| 2    | C/A | 0.87   | -0.67  | 2.93   | -4.26  | -2.33  | 50.31   |

~~~~~  
 ave. 1.01 1.15 2.30 -16.95 -13.84 42.14  
 s.d. 0.19 2.57 0.88 17.94 16.27 11.56

\*\*\*\*\*

Sugar conformational parameters:

| base |   | v0    | v1   | v2    | v3   | v4   | tm   | P     | Puckering |
|------|---|-------|------|-------|------|------|------|-------|-----------|
| 1    | C | -19.8 | 36.2 | -38.0 | 27.7 | -5.0 | 38.8 | 168.8 | C2'-endo  |
| 2    | C | -42.4 | 48.4 | -35.8 | 12.4 | 18.5 | 47.7 | 138.7 | C1'-exo   |
| 3    | A | -14.7 | 31.0 | -34.5 | 27.0 | -7.9 | 34.7 | 174.2 | C2'-endo  |

\*\*\*\*\*

**5'-CCA-3' (Na model) singly ionized / M06-2X**step overlap area (Å<sup>2</sup>)

1 C/C 1.38  
 2 C/A 1.64

\*\*\*\*\*

Local base step parameters

| step |     | Shift | Slide | Rise | Tilt  | Roll   | Twist |
|------|-----|-------|-------|------|-------|--------|-------|
| 1    | C/C | -1.10 | -0.54 | 2.62 | 9.87  | -20.35 | 24.52 |
| 2    | C/A | 1.07  | 0.36  | 2.41 | 11.26 | -11.19 | 54.34 |

~~~~~  
 ave. -0.01 -0.09 2.51 10.56 -15.77 39.43  
 s.d. 1.53 0.64 0.15 0.98 6.47 21.08

\*\*\*\*\*

Local base helical parameters

| step |     | X-disp | Y-disp | h-Rise | Incl.  | Tip    | h-Twist |
|------|-----|--------|--------|--------|--------|--------|---------|
| 1    | C/C | 1.81   | 3.26   | 1.95   | -38.94 | -18.88 | 33.24   |
| 2    | C/A | 0.86   | -0.65  | 2.46   | -11.97 | -12.04 | 56.44   |

~~~~~  
 ave. 1.34 1.30 2.21 -25.45 -15.46 44.84  
 s.d. 0.67 2.76 0.36 19.07 4.84 16.41

\*\*\*\*\*

Sugar conformational parameters:

| base |   | v0    | v1   | v2    | v3   | v4    | tm   | P     | Puckering |
|------|---|-------|------|-------|------|-------|------|-------|-----------|
| 1    | C | -20.1 | 36.2 | -37.8 | 27.3 | -4.6  | 38.7 | 168.1 | C2'-endo  |
| 2    | C | -42.8 | 47.7 | -34.2 | 10.4 | 20.0  | 47.2 | 136.4 | C1'-exo   |
| 3    | A | -10.7 | 28.1 | -33.6 | 28.5 | -11.4 | 33.6 | 180.6 | C3'-exo   |

\*\*\*\*\*

**5'-CAA-3' (Na model) neutral / M06-2X**step overlap area (Å<sup>2</sup>)

1 C/A 0.87  
2 A/A 4.79

\*\*\*\*\*

Local base step parameters

| step  | Shift | Slide | Rise | Tilt  | Roll   | Twist |
|-------|-------|-------|------|-------|--------|-------|
| 1 C/A | -0.72 | 0.11  | 2.46 | 13.44 | -15.83 | 28.77 |
| 2 A/A | 1.10  | -0.03 | 3.17 | -2.44 | 4.59   | 51.63 |

~~~~~  
ave. 0.19 0.04 2.81 5.50 -5.62 40.20  
s.d. 1.28 0.10 0.50 11.23 14.44 16.16

\*\*\*\*\*

Local base helical parameters

| step  | X-disp | Y-disp | h-Rise | Incl.  | Tip    | h-Twist |
|-------|--------|--------|--------|--------|--------|---------|
| 1 C/A | 1.83   | 2.58   | 1.69   | -27.76 | -23.57 | 35.35   |
| 2 A/A | -0.33  | -1.41  | 3.10   | 5.25   | 2.80   | 51.87   |

~~~~~  
ave. 0.75 0.59 2.40 -11.25 -10.39 43.61  
s.d. 1.53 2.82 1.00 23.35 18.64 11.68

\*\*\*\*\*

Sugar conformational parameters:

| base | v0    | v1   | v2    | v3   | v4   | tm   | P     | Puckering |
|------|-------|------|-------|------|------|------|-------|-----------|
| 1 C  | -19.7 | 36.0 | -37.8 | 27.6 | -5.0 | 38.5 | 168.7 | C2'-endo  |
| 2 A  | -35.9 | 45.1 | -36.8 | 17.1 | 11.6 | 44.2 | 146.4 | C2'-endo  |
| 3 A  | -14.1 | 30.7 | -34.5 | 27.4 | -8.5 | 34.7 | 175.2 | C2'-endo  |

\*\*\*\*\*

**5'-CAA-3' (Na model) singly ionized / M06-2X**step overlap area (Å<sup>2</sup>)

1 C/A 0.00  
2 A/A 5.61

\*\*\*\*\*

Local base step parameters

| step  | Shift | Slide | Rise | Tilt  | Roll   | Twist |
|-------|-------|-------|------|-------|--------|-------|
| 1 C/A | -1.72 | 0.64  | 2.17 | 18.97 | -31.63 | 25.46 |
| 2 A/A | 1.38  | -0.12 | 3.04 | -0.69 | 5.24   | 50.27 |

~~~~~  
ave. -0.17 0.26 2.60 9.14 -13.20 37.86  
s.d. 2.19 0.54 0.62 13.91 26.07 17.55

\*\*\*\*\*

Local base helical parameters

| step  | X-disp | Y-disp | h-Rise | Incl.  | Tip    | h-Twist |
|-------|--------|--------|--------|--------|--------|---------|
| 1 C/A | 2.16   | 3.05   | 0.09   | -48.49 | -29.09 | 44.56   |
| 2 A/A | -0.48  | -1.66  | 3.00   | 6.14   | 0.81   | 50.53   |

~~~~~  
ave. 0.84 0.70 1.54 -21.17 -14.14 47.55  
s.d. 1.87 3.33 2.06 38.64 21.14 4.22

\*\*\*\*\*

Sugar conformational parameters:

| base | v0    | v1   | v2    | v3   | v4   | tm   | P     | Puckering |
|------|-------|------|-------|------|------|------|-------|-----------|
| 1 C  | -19.8 | 34.9 | -36.2 | 25.9 | -3.9 | 37.1 | 167.4 | C2'-endo  |
| 2 A  | -30.2 | 42.1 | -37.2 | 21.0 | 5.5  | 41.5 | 153.6 | C2'-endo  |
| 3 A  | -15.2 | 31.3 | -34.5 | 26.8 | -7.5 | 34.7 | 173.4 | C2'-endo  |

\*\*\*\*\*

**5'-ACC-3' (PO- model) neutral / M06-2X**step overlap area ( $\text{\AA}^2$ )

1 A/C 4.22  
2 C/C 1.07

\*\*\*\*\*

## Local base step parameters

| step  | Shift | Slide | Rise | Tilt   | Roll  | Twist |
|-------|-------|-------|------|--------|-------|-------|
| 1 A/C | 0.59  | -0.08 | 2.76 | 6.37   | 1.70  | 34.48 |
| 2 C/C | 1.08  | -1.15 | 4.34 | -19.31 | 14.17 | 48.66 |
| ave.  | 0.83  | -0.61 | 3.55 | -6.47  | 7.93  | 41.57 |
| s.d.  | 0.35  | 0.76  | 1.12 | 18.16  | 8.82  | 10.03 |

\*\*\*\*\*

## Local base helical parameters

| step  | X-disp | Y-disp | h-Rise | Incl. | Tip    | h-Twist |
|-------|--------|--------|--------|-------|--------|---------|
| 1 A/C | -0.35  | -0.15  | 2.81   | 2.84  | -10.63 | 35.08   |
| 2 C/C | -2.36  | -2.68  | 3.30   | 16.11 | 21.96  | 53.92   |
| ave.  | -1.35  | -1.41  | 3.06   | 9.47  | 5.66   | 44.50   |
| s.d.  | 1.43   | 1.79   | 0.35   | 9.39  | 23.05  | 13.32   |

\*\*\*\*\*

## Sugar conformational parameters:

| base | v0    | v1   | v2    | v3   | v4   | tm   | P     | Puckering |
|------|-------|------|-------|------|------|------|-------|-----------|
| 1 A  | -26.1 | 40.9 | -39.4 | 25.7 | -0.0 | 41.6 | 161.2 | C2'-endo  |
| 2 C  | -43.0 | 45.8 | -30.8 | 6.7  | 22.5 | 45.9 | 132.2 | C1'-exo   |
| 3 C  | -16.8 | 32.3 | -34.7 | 25.9 | -5.9 | 35.1 | 170.7 | C2'-endo  |

\*\*\*\*\*

**5'-ACC-3' (PO- model) singly ionized / M06-2X**step overlap area ( $\text{\AA}^2$ )

1 A/C 1.74  
2 C/C 0.19

\*\*\*\*\*

## Local base step parameters

| step  | Shift | Slide | Rise | Tilt   | Roll   | Twist |
|-------|-------|-------|------|--------|--------|-------|
| 1 A/C | -1.15 | -0.30 | 2.81 | 7.85   | -19.51 | 25.54 |
| 2 C/C | 1.06  | -1.52 | 5.11 | -31.63 | 17.04  | 47.84 |
| ave.  | -0.04 | -0.91 | 3.96 | -11.89 | -1.24  | 36.69 |
| s.d.  | 1.56  | 0.87  | 1.63 | 27.92  | 25.85  | 15.77 |

\*\*\*\*\*

## Local base helical parameters

| step  | X-disp | Y-disp | h-Rise | Incl.  | Tip    | h-Twist |
|-------|--------|--------|--------|--------|--------|---------|
| 1 A/C | 2.29   | 3.16   | 2.09   | -37.13 | -14.94 | 32.98   |
| 2 C/C | -2.80  | -3.41  | 3.25   | 18.33  | 34.02  | 59.19   |
| ave.  | -0.25  | -0.12  | 2.67   | -9.40  | 9.54   | 46.08   |
| s.d.  | 3.60   | 4.65   | 0.82   | 39.21  | 34.62  | 18.53   |

\*\*\*\*\*

## Sugar conformational parameters:

| base | v0    | v1   | v2    | v3   | v4    | tm   | P     | Puckering |
|------|-------|------|-------|------|-------|------|-------|-----------|
| 1 A  | -12.9 | 32.1 | -37.9 | 31.8 | -12.0 | 37.9 | 179.4 | C2'-endo  |
| 2 C  | -41.1 | 47.8 | -35.5 | 12.8 | 17.4  | 46.7 | 139.5 | C1'-exo   |
| 3 C  | -14.1 | 30.3 | -34.1 | 27.0 | -8.3  | 34.3 | 175.1 | C2'-endo  |

\*\*\*\*\*



**5'-AAC-3' (PO- model) neutral / M06-2X**step overlap area ( $\text{\AA}^2$ )

1 A/A 5.78  
 2 A/C 4.92

\*\*\*\*\*

Local base step parameters

| step  | Shift | Slide | Rise | Tilt   | Roll  | Twist |
|-------|-------|-------|------|--------|-------|-------|
| 1 A/A | 0.74  | 0.49  | 3.19 | -0.68  | 7.64  | 37.10 |
| 2 A/C | 1.17  | -1.38 | 4.05 | -16.08 | 20.29 | 49.33 |

~~~~~

|      |      |       |      |       |       |       |
|------|------|-------|------|-------|-------|-------|
| ave. | 0.95 | -0.44 | 3.62 | -8.38 | 13.96 | 43.22 |
| s.d. | 0.31 | 1.32  | 0.61 | 10.89 | 8.94  | 8.65  |

\*\*\*\*\*

Local base helical parameters

| step  | X-disp | Y-disp | h-Rise | Incl. | Tip   | h-Twist |
|-------|--------|--------|--------|-------|-------|---------|
| 1 A/A | -0.21  | -1.23  | 3.22   | 11.85 | 1.06  | 37.86   |
| 2 A/C | -2.83  | -2.33  | 2.85   | 22.60 | 17.92 | 55.34   |

~~~~~

|      |       |       |      |       |       |       |
|------|-------|-------|------|-------|-------|-------|
| ave. | -1.52 | -1.78 | 3.03 | 17.23 | 9.49  | 46.60 |
| s.d. | 1.85  | 0.78  | 0.26 | 7.60  | 11.92 | 12.36 |

\*\*\*\*\*

Sugar conformational parameters:

| base | v0    | v1   | v2    | v3   | v4   | tm   | P     | Puckering |
|------|-------|------|-------|------|------|------|-------|-----------|
| 1 A  | -31.7 | 44.1 | -39.2 | 22.4 | 5.5  | 43.7 | 154.0 | C2'-endo  |
| 2 A  | -34.1 | 45.1 | -38.0 | 19.5 | 8.9  | 44.1 | 149.6 | C2'-endo  |
| 3 C  | -12.8 | 29.0 | -33.3 | 26.9 | -9.1 | 33.4 | 176.8 | C2'-endo  |

\*\*\*\*\*

**5'-AAC-3' (PO- model) singly ionized / M06-2X**step overlap area ( $\text{\AA}^2$ )

1 A/A 7.04  
 2 A/C 4.97

\*\*\*\*\*

Local base step parameters

| step  | Shift | Slide | Rise | Tilt  | Roll | Twist |
|-------|-------|-------|------|-------|------|-------|
| 1 A/A | 1.53  | 0.34  | 3.05 | 0.20  | 4.99 | 41.93 |
| 2 A/C | 1.81  | 0.05  | 2.62 | 10.82 | 1.32 | 55.74 |

~~~~~

|      |      |      |      |      |      |       |
|------|------|------|------|------|------|-------|
| ave. | 1.67 | 0.19 | 2.83 | 5.51 | 3.15 | 48.84 |
| s.d. | 0.20 | 0.20 | 0.30 | 7.51 | 2.59 | 9.77  |

\*\*\*\*\*

Local base helical parameters

| step  | X-disp | Y-disp | h-Rise | Incl. | Tip    | h-Twist |
|-------|--------|--------|--------|-------|--------|---------|
| 1 A/A | -0.01  | -2.10  | 3.07   | 6.94  | -0.28  | 42.21   |
| 2 A/C | -0.01  | -1.39  | 2.90   | 1.40  | -11.45 | 56.72   |

~~~~~

|      |       |       |      |      |       |       |
|------|-------|-------|------|------|-------|-------|
| ave. | -0.01 | -1.75 | 2.99 | 4.17 | -5.87 | 49.46 |
| s.d. | 0.00  | 0.50  | 0.12 | 3.92 | 7.90  | 10.25 |

\*\*\*\*\*

Sugar conformational parameters:

| base | v0    | v1   | v2    | v3   | v4    | tm   | P     | Puckering |
|------|-------|------|-------|------|-------|------|-------|-----------|
| 1 A  | -32.1 | 45.5 | -40.9 | 24.0 | 4.7   | 45.1 | 155.2 | C2'-endo  |
| 2 A  | -39.2 | 47.4 | -36.3 | 15.1 | 14.6  | 45.9 | 142.4 | C1'-exo   |
| 3 C  | 2.4   | 18.0 | -30.1 | 32.5 | -22.2 | 32.7 | 202.9 | C3'-exo   |

\*\*\*\*\*

**5'-CCA-3' (PO- model) neutral / M06-2X**

```

step  overlap area (Å2)
1  C/C  1.86
2  C/A  1.85
*****
Local base step parameters
  step      Shift      Slide      Rise      Tilt      Roll      Twist
1  C/C      -0.84     -0.30     2.42     12.27     -15.92    28.06
2  C/A       0.78      0.59     2.98     2.19      -0.86     50.39
~~~~~
  ave.      -0.03     0.14     2.70     7.23     -8.39     39.22
  s.d.       1.14     0.63     0.39     7.13     10.65     15.79
*****
Local base helical parameters
  step      X-disp      Y-disp      h-Rise      Incl.      Tip      h-Twist
1  C/C       1.28       2.80       1.83      -28.65     -22.08    34.40
2  C/A       0.74      -0.77       3.00      -1.01     -2.57     50.44
~~~~~
  ave.       1.01       1.01       2.41     -14.83     -12.33    42.42
  s.d.       0.38       2.53       0.82     19.54     13.79     11.34
*****
Sugar conformational parameters:
base      v0      v1      v2      v3      v4      tm      P      Puckering
1  C     -20.8   37.0   -38.4   27.6   -4.4   39.3   167.7   C2'-endo
2  C     -38.7   47.1   -37.4   16.1   13.9   46.2   144.0   C2'-endo
3  A     -11.8   29.2   -34.4   28.6  -10.8   34.5   179.1   C2'-endo
*****

```

**5'-CCA-3' (PO- model) singly ionized / M06-2X**

```

step  overlap area (Å2)
1  C/C  1.37
2  C/A  2.05
*****
Local base step parameters
  step      Shift      Slide      Rise      Tilt      Roll      Twist
1  C/C      -1.07     -0.54     2.72     7.56     -18.21    25.19
2  C/A       1.22      0.42     2.43     11.90     -6.02     55.41
~~~~~
  ave.       0.08     -0.06     2.58     9.73     -12.11    40.30
  s.d.       1.62     0.68     0.20     3.07     8.62     21.37
*****
Local base helical parameters
  step      X-disp      Y-disp      h-Rise      Incl.      Tip      h-Twist
1  C/C       1.83       3.11       2.21     -35.60     -14.78    31.89
2  C/A       0.70      -0.77       2.57     -6.37     -12.59    56.87
~~~~~
  ave.       1.27       1.17       2.39     -20.98     -13.68    44.38
  s.d.       0.80       2.75       0.25     20.67     1.54     17.66
*****
Sugar conformational parameters:
base      v0      v1      v2      v3      v4      tm      P      Puckering
1  C     -20.4   36.6   -38.1   27.4   -4.5   38.9   167.9   C2'-endo
2  C     -42.9   47.5   -33.4   9.5    20.6   46.9   135.3   C1'-exo
3  A     10.1   11.6   -27.0   33.5  -27.7   33.2   215.7   C3'-exo
*****

```

**5'-CAA-3' (PO- model) neutral / M06-2X**step overlap area (Å<sup>2</sup>)

1 C/A 0.72

2 A/A 4.81

\*\*\*\*\*

## Local base step parameters

| step  | Shift | Slide | Rise | Tilt  | Roll   | Twist |
|-------|-------|-------|------|-------|--------|-------|
| 1 C/A | -0.78 | 0.18  | 2.45 | 13.79 | -17.19 | 29.34 |
| 2 A/A | 1.08  | 0.00  | 3.18 | -2.47 | 5.98   | 50.96 |
| ave.  | 0.15  | 0.09  | 2.82 | 5.66  | -5.60  | 40.15 |
| s.d.  | 1.32  | 0.13  | 0.51 | 11.50 | 16.38  | 15.29 |

\*\*\*\*\*

## Local base helical parameters

| step  | X-disp | Y-disp | h-Rise | Incl.  | Tip    | h-Twist |
|-------|--------|--------|--------|--------|--------|---------|
| 1 C/A | 1.93   | 2.57   | 1.61   | -29.29 | -23.50 | 36.55   |
| 2 A/A | -0.40  | -1.40  | 3.11   | 6.92   | 2.86   | 51.34   |
| ave.  | 0.77   | 0.58   | 2.36   | -11.19 | -10.32 | 43.94   |
| s.d.  | 1.64   | 2.81   | 1.06   | 25.60  | 18.64  | 10.46   |

\*\*\*\*\*

## Sugar conformational parameters:

| base | v0    | v1   | v2    | v3   | v4    | tm   | P     | Puckering |
|------|-------|------|-------|------|-------|------|-------|-----------|
| 1 C  | -20.6 | 36.8 | -38.2 | 27.5 | -4.4  | 39.1 | 167.7 | C2'-endo  |
| 2 A  | -33.1 | 44.4 | -38.2 | 20.1 | 8.0   | 43.7 | 150.9 | C2'-endo  |
| 3 A  | -12.7 | 29.9 | -34.6 | 28.4 | -10.0 | 34.7 | 177.8 | C2'-endo  |

\*\*\*\*\*

**5'-CAA-3' (PO- model) singly ionized / M06-2X**step overlap area (Å<sup>2</sup>)

1 C/A 0.00

2 A/A 5.16

\*\*\*\*\*

## Local base step parameters

| step  | Shift | Slide | Rise | Tilt  | Roll   | Twist |
|-------|-------|-------|------|-------|--------|-------|
| 1 C/A | -1.85 | 0.68  | 2.38 | 15.49 | -35.03 | 25.04 |
| 2 A/A | 1.31  | -0.15 | 2.97 | 1.72  | 4.33   | 52.90 |
| ave.  | -0.27 | 0.27  | 2.67 | 8.61  | -15.35 | 38.97 |
| s.d.  | 2.23  | 0.59  | 0.42 | 9.74  | 27.83  | 19.70 |

\*\*\*\*\*

## Local base helical parameters

| step  | X-disp | Y-disp | h-Rise | Incl.  | Tip    | h-Twist |
|-------|--------|--------|--------|--------|--------|---------|
| 1 C/A | 2.50   | 3.10   | 0.20   | -53.07 | -23.47 | 45.50   |
| 2 A/A | -0.42  | -1.37  | 2.99   | 4.85   | -1.92  | 53.09   |
| ave.  | 1.04   | 0.87   | 1.59   | -24.11 | -12.70 | 49.30   |
| s.d.  | 2.06   | 3.16   | 1.97   | 40.95  | 15.24  | 5.37    |

\*\*\*\*\*

## Sugar conformational parameters:

| base | v0    | v1   | v2    | v3   | v4    | tm   | P     | Puckering |
|------|-------|------|-------|------|-------|------|-------|-----------|
| 1 C  | -20.2 | 35.6 | -36.8 | 26.3 | -3.9  | 37.7 | 167.3 | C2'-endo  |
| 2 A  | -22.7 | 39.6 | -40.0 | 28.4 | -3.9  | 41.2 | 166.2 | C2'-endo  |
| 3 A  | 1.3   | 18.5 | -29.7 | 31.3 | -20.7 | 31.8 | 200.8 | C3'-exo   |

\*\*\*\*\*

## Optimized Geometries. Cartesian coordinates (Å), PDB format

| COMPND | ACC / M06-2X / H | MODEL / NEUTRAL        |        |        |        |      |      |  |   |
|--------|------------------|------------------------|--------|--------|--------|------|------|--|---|
| ATOM   | 1 O5'            | DA A 1                 | 0.000  | 0.000  | 0.000  | 1.00 | 0.00 |  | O |
| ATOM   | 2 C5'            | DA A 1                 | 0.000  | 0.000  | 1.415  | 1.00 | 0.00 |  | C |
| ATOM   | 3 C4'            | DA A 1                 | 1.436  | 0.000  | 1.905  | 1.00 | 0.00 |  | C |
| ATOM   | 4 O4'            | DA A 1                 | 2.090  | -1.207 | 1.507  | 1.00 | 0.00 |  | O |
| ATOM   | 5 C3'            | DA A 1                 | 2.295  | 1.128  | 1.326  | 1.00 | 0.00 |  | C |
| ATOM   | 6 O3'            | DA A 1                 | 3.346  | 1.362  | 2.298  | 1.00 | 0.00 |  | O |
| ATOM   | 7 C2'            | DA A 1                 | 2.872  | 0.494  | 0.076  | 1.00 | 0.00 |  | C |
| ATOM   | 8 C1'            | DA A 1                 | 3.122  | -0.927 | 0.571  | 1.00 | 0.00 |  | C |
| ATOM   | 9 N9             | DA A 1                 | 3.128  | -1.919 | -0.479 | 1.00 | 0.00 |  | N |
| ATOM   | 10 C8            | DA A 1                 | 2.477  | -1.914 | -1.693 | 1.00 | 0.00 |  | C |
| ATOM   | 11 N7            | DA A 1                 | 2.798  | -2.920 | -2.466 | 1.00 | 0.00 |  | N |
| ATOM   | 12 C5            | DA A 1                 | 3.703  | -3.643 | -1.713 | 1.00 | 0.00 |  | C |
| ATOM   | 13 C6            | DA A 1                 | 4.483  | -4.782 | -1.986 | 1.00 | 0.00 |  | C |
| ATOM   | 14 N6            | DA A 1                 | 4.502  | -5.355 | -3.214 | 1.00 | 0.00 |  | N |
| ATOM   | 15 N1            | DA A 1                 | 5.280  | -5.265 | -1.024 | 1.00 | 0.00 |  | N |
| ATOM   | 16 C2            | DA A 1                 | 5.358  | -4.595 | 0.135  | 1.00 | 0.00 |  | C |
| ATOM   | 17 N3            | DA A 1                 | 4.730  | -3.479 | 0.493  | 1.00 | 0.00 |  | N |
| ATOM   | 18 C4            | DA A 1                 | 3.915  | -3.046 | -0.475 | 1.00 | 0.00 |  | C |
| ATOM   | 19 P             | DC A 2                 | 4.449  | 2.494  | 2.078  | 1.00 | 0.00 |  | P |
| ATOM   | 20 OP1           | DC A 2                 | 3.747  | 3.891  | 2.384  | 1.00 | 0.00 |  | O |
| ATOM   | 21 OP2           | DC A 2                 | 5.104  | 2.544  | 0.755  | 1.00 | 0.00 |  | O |
| ATOM   | 22 O5'           | DC A 2                 | 5.388  | 2.268  | 3.338  | 1.00 | 0.00 |  | O |
| ATOM   | 23 C5'           | DC A 2                 | 5.607  | 1.010  | 4.001  | 1.00 | 0.00 |  | C |
| ATOM   | 24 C4'           | DC A 2                 | 6.725  | 0.219  | 3.361  | 1.00 | 0.00 |  | C |
| ATOM   | 25 O4'           | DC A 2                 | 6.268  | -0.392 | 2.157  | 1.00 | 0.00 |  | O |
| ATOM   | 26 C3'           | DC A 2                 | 7.968  | 1.059  | 2.970  | 1.00 | 0.00 |  | C |
| ATOM   | 27 O3'           | DC A 2                 | 9.104  | 0.373  | 3.539  | 1.00 | 0.00 |  | O |
| ATOM   | 28 C2'           | DC A 2                 | 7.983  | 0.966  | 1.449  | 1.00 | 0.00 |  | C |
| ATOM   | 29 C1'           | DC A 2                 | 7.401  | -0.435 | 1.282  | 1.00 | 0.00 |  | C |
| ATOM   | 30 N1            | DC A 2                 | 6.977  | -0.850 | -0.031 | 1.00 | 0.00 |  | N |
| ATOM   | 31 C2            | DC A 2                 | 7.334  | -2.158 | -0.472 | 1.00 | 0.00 |  | C |
| ATOM   | 32 O2            | DC A 2                 | 8.010  | -2.873 | 0.259  | 1.00 | 0.00 |  | O |
| ATOM   | 33 N3            | DC A 2                 | 6.897  | -2.550 | -1.700 | 1.00 | 0.00 |  | N |
| ATOM   | 34 C4            | DC A 2                 | 6.163  | -1.745 | -2.444 | 1.00 | 0.00 |  | C |
| ATOM   | 35 N4            | DC A 2                 | 5.790  | -2.190 | -3.666 | 1.00 | 0.00 |  | N |
| ATOM   | 36 C5            | DC A 2                 | 5.786  | -0.422 | -2.029 | 1.00 | 0.00 |  | C |
| ATOM   | 37 C6            | DC A 2                 | 6.219  | -0.027 | -0.808 | 1.00 | 0.00 |  | C |
| ATOM   | 38 P             | DC A 3                 | 10.570 | 1.002  | 3.484  | 1.00 | 0.00 |  | P |
| ATOM   | 39 OP1           | DC A 3                 | 10.521 | 2.344  | 4.344  | 1.00 | 0.00 |  | O |
| ATOM   | 40 OP2           | DC A 3                 | 11.130 | 1.288  | 2.148  | 1.00 | 0.00 |  | O |
| ATOM   | 41 O5'           | DC A 3                 | 11.377 | -0.008 | 4.406  | 1.00 | 0.00 |  | O |
| ATOM   | 42 C5'           | DC A 3                 | 11.026 | -1.388 | 4.610  | 1.00 | 0.00 |  | C |
| ATOM   | 43 C4'           | DC A 3                 | 11.498 | -2.267 | 3.478  | 1.00 | 0.00 |  | C |
| ATOM   | 44 O4'           | DC A 3                 | 10.720 | -2.022 | 2.309  | 1.00 | 0.00 |  | O |
| ATOM   | 45 C3'           | DC A 3                 | 12.984 | -2.084 | 3.073  | 1.00 | 0.00 |  | C |
| ATOM   | 46 O3'           | DC A 3                 | 13.618 | -3.328 | 3.312  | 1.00 | 0.00 |  | O |
| ATOM   | 47 C2'           | DC A 3                 | 12.889 | -1.749 | 1.582  | 1.00 | 0.00 |  | C |
| ATOM   | 48 C1'           | DC A 3                 | 11.563 | -2.411 | 1.224  | 1.00 | 0.00 |  | C |
| ATOM   | 49 N1            | DC A 3                 | 10.963 | -2.021 | -0.031 | 1.00 | 0.00 |  | N |
| ATOM   | 50 C2            | DC A 3                 | 10.721 | -3.008 | -1.022 | 1.00 | 0.00 |  | C |
| ATOM   | 51 O2            | DC A 3                 | 11.086 | -4.163 | -0.819 | 1.00 | 0.00 |  | O |
| ATOM   | 52 N3            | DC A 3                 | 10.116 | -2.613 | -2.177 | 1.00 | 0.00 |  | N |
| ATOM   | 53 C4            | DC A 3                 | 9.735  | -1.358 | -2.337 | 1.00 | 0.00 |  | C |
| ATOM   | 54 N4            | DC A 3                 | 9.128  | -1.028 | -3.498 | 1.00 | 0.00 |  | N |
| ATOM   | 55 C5            | DC A 3                 | 9.969  | -0.337 | -1.356 | 1.00 | 0.00 |  | C |
| ATOM   | 56 C6            | DC A 3                 | 10.589 | -0.728 | -0.217 | 1.00 | 0.00 |  | C |
| END    |                  |                        |        |        |        |      |      |  |   |
| COMPND | ACC / M06-2X / H | MODEL / SINGLY IONIZED |        |        |        |      |      |  |   |
| ATOM   | 1 O5'            | DA A 1                 | 0.000  | 0.000  | 0.000  | 1.00 | 0.00 |  | O |
| ATOM   | 2 C5'            | DA A 1                 | 0.000  | 0.000  | 1.418  | 1.00 | 0.00 |  | C |
| ATOM   | 3 C4'            | DA A 1                 | 1.441  | 0.000  | 1.890  | 1.00 | 0.00 |  | C |
| ATOM   | 4 O4'            | DA A 1                 | 2.067  | -1.240 | 1.524  | 1.00 | 0.00 |  | O |
| ATOM   | 5 C3'            | DA A 1                 | 2.285  | 1.102  | 1.242  | 1.00 | 0.00 |  | C |
| ATOM   | 6 O3'            | DA A 1                 | 3.317  | 1.478  | 2.184  | 1.00 | 0.00 |  | O |
| ATOM   | 7 C2'            | DA A 1                 | 2.913  | 0.402  | 0.054  | 1.00 | 0.00 |  | C |
| ATOM   | 8 C1'            | DA A 1                 | 3.072  | -1.025 | 0.568  | 1.00 | 0.00 |  | C |
| ATOM   | 9 N9             | DA A 1                 | 2.943  | -1.997 | -0.521 | 1.00 | 0.00 |  | N |
| ATOM   | 10 C8            | DA A 1                 | 1.930  | -2.114 | -1.407 | 1.00 | 0.00 |  | C |
| ATOM   | 11 N7            | DA A 1                 | 2.165  | -3.001 | -2.391 | 1.00 | 0.00 |  | N |
| ATOM   | 12 C5            | DA A 1                 | 3.388  | -3.462 | -2.120 | 1.00 | 0.00 |  | C |
| ATOM   | 13 C6            | DA A 1                 | 4.254  | -4.396 | -2.781 | 1.00 | 0.00 |  | C |
| ATOM   | 14 N6            | DA A 1                 | 3.898  | -5.004 | -3.889 | 1.00 | 0.00 |  | N |
| ATOM   | 15 N1            | DA A 1                 | 5.470  | -4.652 | -2.239 | 1.00 | 0.00 |  | N |
| ATOM   | 16 C2            | DA A 1                 | 5.808  | -4.033 | -1.132 | 1.00 | 0.00 |  | C |
| ATOM   | 17 N3            | DA A 1                 | 5.075  | -3.136 | -0.389 | 1.00 | 0.00 |  | N |
| ATOM   | 18 C4            | DA A 1                 | 3.926  | -2.878 | -0.933 | 1.00 | 0.00 |  | C |
| ATOM   | 19 P             | DC A 2                 | 4.239  | 2.745  | 1.849  | 1.00 | 0.00 |  | P |
| ATOM   | 20 OP1           | DC A 2                 | 3.611  | 3.992  | 2.611  | 1.00 | 0.00 |  | O |
| ATOM   | 21 OP2           | DC A 2                 | 4.403  | 3.051  | 0.415  | 1.00 | 0.00 |  | O |
| ATOM   | 22 O5'           | DC A 2                 | 5.547  | 2.441  | 2.701  | 1.00 | 0.00 |  | O |
| ATOM   | 23 C5'           | DC A 2                 | 6.086  | 1.134  | 2.957  | 1.00 | 0.00 |  | C |
| ATOM   | 24 C4'           | DC A 2                 | 6.984  | 0.658  | 1.839  | 1.00 | 0.00 |  | C |
| ATOM   | 25 O4'           | DC A 2                 | 6.196  | 0.254  | 0.723  | 1.00 | 0.00 |  | O |
| ATOM   | 26 C3'           | DC A 2                 | 7.973  | 1.723  | 1.300  | 1.00 | 0.00 |  | C |
| ATOM   | 27 O3'           | DC A 2                 | 9.268  | 1.092  | 1.314  | 1.00 | 0.00 |  | O |
| ATOM   | 28 C2'           | DC A 2                 | 7.488  | 1.963  | -0.127 | 1.00 | 0.00 |  | C |
| ATOM   | 29 C1'           | DC A 2                 | 6.967  | 0.568  | -0.445 | 1.00 | 0.00 |  | C |
| ATOM   | 30 N1            | DC A 2                 | 6.133  | 0.373  | -1.607 | 1.00 | 0.00 |  | N |
| ATOM   | 31 C2            | DC A 2                 | 6.150  | -0.921 | -2.200 | 1.00 | 0.00 |  | C |
| ATOM   | 32 O2            | DC A 2                 | 7.004  | -1.727 | -1.843 | 1.00 | 0.00 |  | O |
| ATOM   | 33 N3            | DC A 2                 | 5.182  | -1.221 | -3.109 | 1.00 | 0.00 |  | N |
| ATOM   | 34 C4            | DC A 2                 | 4.346  | -0.274 | -3.526 | 1.00 | 0.00 |  | C |
| ATOM   | 35 N4            | DC A 2                 | 3.394  | -0.631 | -4.397 | 1.00 | 0.00 |  | N |
| ATOM   | 36 C5            | DC A 2                 | 4.420  | 1.086  | -3.072 | 1.00 | 0.00 |  | C |
| ATOM   | 37 C6            | DC A 2                 | 5.305  | 1.346  | -2.083 | 1.00 | 0.00 |  | C |
| ATOM   | 38 P             | DC A 3                 | 10.600 | 1.887  | 0.942  | 1.00 | 0.00 |  | P |
| ATOM   | 39 OP1           | DC A 3                 | 10.754 | 3.043  | 2.031  | 1.00 | 0.00 |  | O |
| ATOM   | 40 OP2           | DC A 3                 | 10.681 | 2.469  | -0.413 | 1.00 | 0.00 |  | O |
| ATOM   | 41 O5'           | DC A 3                 | 11.719 | 0.832  | 1.333  | 1.00 | 0.00 |  | O |
| ATOM   | 42 C5'           | DC A 3                 | 11.509 | -0.587 | 1.456  | 1.00 | 0.00 |  | C |
| ATOM   | 43 C4'           | DC A 3                 | 11.576 | -1.275 | 0.115  | 1.00 | 0.00 |  | C |
| ATOM   | 44 O4'           | DC A 3                 | 10.436 | -0.925 | -0.665 | 1.00 | 0.00 |  | O |
| ATOM   | 45 C3'           | DC A 3                 | 12.824 | -0.924 | -0.737 | 1.00 | 0.00 |  | C |
| ATOM   | 46 O3'           | DC A 3                 | 13.497 | -2.146 | -0.984 | 1.00 | 0.00 |  | O |
| ATOM   | 47 C2'           | DC A 3                 | 12.210 | -0.330 | -2.007 | 1.00 | 0.00 |  | C |
| ATOM   | 48 C1'           | DC A 3                 | 10.863 | -1.044 | -2.022 | 1.00 | 0.00 |  | C |
| ATOM   | 49 N1            | DC A 3                 | 9.847  | -0.518 | -2.904 | 1.00 | 0.00 |  | N |

|      |    |    |    |   |   |       |        |        |      |      |   |
|------|----|----|----|---|---|-------|--------|--------|------|------|---|
| ATOM | 50 | C2 | DC | A | 3 | 9.219 | -1.392 | -3.834 | 1.00 | 0.00 | C |
| ATOM | 51 | O2 | DC | A | 3 | 9.577 | -2.563 | -3.893 | 1.00 | 0.00 | O |
| ATOM | 52 | N3 | DC | A | 3 | 8.257 | -0.868 | -4.643 | 1.00 | 0.00 | N |
| ATOM | 53 | C4 | DC | A | 3 | 7.906 | 0.402  | -4.533 | 1.00 | 0.00 | C |
| ATOM | 54 | N4 | DC | A | 3 | 6.938 | 0.854  | -5.352 | 1.00 | 0.00 | N |
| ATOM | 55 | C5 | DC | A | 3 | 8.514 | 1.307  | -3.598 | 1.00 | 0.00 | C |
| ATOM | 56 | C6 | DC | A | 3 | 9.481 | 0.790  | -2.805 | 1.00 | 0.00 | C |

END

| COMPND | AAC | /   | M06-2X | / | H | MODEL  | /      | NEUTRAL |      |      |   |  |
|--------|-----|-----|--------|---|---|--------|--------|---------|------|------|---|--|
| ATOM   | 1   | O5' | DA     | A | 1 | 0.000  | 0.000  | 0.000   | 1.00 | 0.00 | O |  |
| ATOM   | 2   | C5' | DA     | A | 1 | 0.000  | 0.000  | 1.416   | 1.00 | 0.00 | C |  |
| ATOM   | 3   | C4' | DA     | A | 1 | 1.437  | 0.000  | 1.902   | 1.00 | 0.00 | C |  |
| ATOM   | 4   | O4' | DA     | A | 1 | 2.071  | -1.237 | 1.568   | 1.00 | 0.00 | O |  |
| ATOM   | 5   | C3' | DA     | A | 1 | 2.297  | 1.090  | 1.257   | 1.00 | 0.00 | C |  |
| ATOM   | 6   | O3' | DA     | A | 1 | 3.333  | 1.423  | 2.217   | 1.00 | 0.00 | O |  |
| ATOM   | 7   | C2' | DA     | A | 1 | 2.913  | 0.380  | 0.067   | 1.00 | 0.00 | C |  |
| ATOM   | 8   | C1' | DA     | A | 1 | 3.098  | -1.035 | 0.609   | 1.00 | 0.00 | C |  |
| ATOM   | 9   | N9  | DA     | A | 1 | 3.019  | -2.051 | -0.417  | 1.00 | 0.00 | N |  |
| ATOM   | 10  | C8  | DA     | A | 1 | 2.054  | -2.195 | -1.389  | 1.00 | 0.00 | C |  |
| ATOM   | 11  | N7  | DA     | A | 1 | 2.277  | -3.195 | -2.203  | 1.00 | 0.00 | N |  |
| ATOM   | 12  | C5  | DA     | A | 1 | 3.452  | -3.750 | -1.736  | 1.00 | 0.00 | C |  |
| ATOM   | 13  | C6  | DA     | A | 1 | 4.243  | -4.830 | -2.176  | 1.00 | 0.00 | C |  |
| ATOM   | 14  | N6  | DA     | A | 1 | 3.911  | -5.571 | -3.252  | 1.00 | 0.00 | N |  |
| ATOM   | 15  | N1  | DA     | A | 1 | 5.353  | -5.137 | -1.487  | 1.00 | 0.00 | N |  |
| ATOM   | 16  | C2  | DA     | A | 1 | 5.665  | -4.395 | -0.412  | 1.00 | 0.00 | C |  |
| ATOM   | 17  | N3  | DA     | A | 1 | 5.020  | -3.351 | 0.094   | 1.00 | 0.00 | N |  |
| ATOM   | 18  | C4  | DA     | A | 1 | 3.923  | -3.066 | -0.619  | 1.00 | 0.00 | C |  |
| ATOM   | 19  | P   | DA     | A | 2 | 4.256  | -2.702 | 1.966   | 1.00 | 0.00 | P |  |
| ATOM   | 20  | OP1 | DA     | A | 2 | 3.596  | 3.918  | 2.756   | 1.00 | 0.00 | O |  |
| ATOM   | 21  | OP2 | DA     | A | 2 | 4.470  | 3.074  | 0.554   | 1.00 | 0.00 | O |  |
| ATOM   | 22  | O5' | DA     | A | 2 | 5.539  | 2.372  | 2.849   | 1.00 | 0.00 | O |  |
| ATOM   | 23  | C5' | DA     | A | 2 | 6.015  | 1.050  | 3.147   | 1.00 | 0.00 | C |  |
| ATOM   | 24  | C4' | DA     | A | 2 | 6.918  | 0.525  | 2.055   | 1.00 | 0.00 | C |  |
| ATOM   | 25  | O4' | DA     | A | 2 | 6.131  | 0.224  | 0.904   | 1.00 | 0.00 | O |  |
| ATOM   | 26  | C3' | DA     | A | 2 | 8.006  | 1.518  | 1.580   | 1.00 | 0.00 | C |  |
| ATOM   | 27  | O3' | DA     | A | 2 | 9.228  | 0.755  | 1.520   | 1.00 | 0.00 | O |  |
| ATOM   | 28  | C2' | DA     | A | 2 | 7.543  | 1.895  | 0.179   | 1.00 | 0.00 | C |  |
| ATOM   | 29  | C1' | DA     | A | 2 | 6.919  | 0.570  | -0.238  | 1.00 | 0.00 | C |  |
| ATOM   | 30  | N9  | DA     | A | 2 | 6.099  | 0.590  | -1.412  | 1.00 | 0.00 | N |  |
| ATOM   | 31  | C8  | DA     | A | 2 | 5.382  | 1.633  | -1.964  | 1.00 | 0.00 | C |  |
| ATOM   | 32  | N7  | DA     | A | 2 | 4.776  | 1.315  | -3.078  | 1.00 | 0.00 | N |  |
| ATOM   | 33  | C5  | DA     | A | 2 | 5.113  | -0.011 | -3.280  | 1.00 | 0.00 | C |  |
| ATOM   | 34  | C6  | DA     | A | 2 | 4.862  | -0.910 | -4.335  | 1.00 | 0.00 | C |  |
| ATOM   | 35  | N6  | DA     | A | 2 | 4.184  | -0.532 | -5.446  | 1.00 | 0.00 | N |  |
| ATOM   | 36  | N1  | DA     | A | 2 | 5.372  | -2.146 | -4.266  | 1.00 | 0.00 | N |  |
| ATOM   | 37  | C2  | DA     | A | 2 | 6.166  | -2.450 | -3.228  | 1.00 | 0.00 | C |  |
| ATOM   | 38  | N3  | DA     | A | 2 | 6.514  | -1.686 | -2.196  | 1.00 | 0.00 | N |  |
| ATOM   | 39  | C4  | DA     | A | 2 | 5.943  | -0.479 | -2.269  | 1.00 | 0.00 | C |  |
| ATOM   | 40  | P   | DC     | A | 3 | 10.622 | 1.416  | 1.124   | 1.00 | 0.00 | P |  |
| ATOM   | 41  | OP2 | DC     | A | 3 | 10.713 | 2.092  | -0.189  | 1.00 | 0.00 | O |  |
| ATOM   | 42  | OP1 | DC     | A | 3 | 10.944 | 2.394  | 2.345   | 1.00 | 0.00 | O |  |
| ATOM   | 43  | O5' | DC     | A | 3 | 11.614 | 0.205  | 1.369   | 1.00 | 0.00 | O |  |
| ATOM   | 44  | C5' | DC     | A | 3 | 11.241 | -1.182 | 1.287   | 1.00 | 0.00 | C |  |
| ATOM   | 45  | C4' | DC     | A | 3 | 11.233 | -1.679 | -0.137  | 1.00 | 0.00 | C |  |
| ATOM   | 46  | O4' | DC     | A | 3 | 10.133 | -1.119 | -0.852  | 1.00 | 0.00 | O |  |
| ATOM   | 47  | C3' | DC     | A | 3 | 12.511 | -1.346 | -0.950  | 1.00 | 0.00 | C |  |
| ATOM   | 48  | O3' | DC     | A | 3 | 13.071 | -2.587 | -1.340  | 1.00 | 0.00 | O |  |
| ATOM   | 49  | C2' | DC     | A | 3 | 11.959 | -0.555 | -2.139  | 1.00 | 0.00 | C |  |
| ATOM   | 50  | C1' | DC     | A | 3 | 10.550 | -1.130 | -2.218  | 1.00 | 0.00 | C |  |
| ATOM   | 51  | N1  | DC     | A | 3 | 9.595  | -0.419 | -3.038  | 1.00 | 0.00 | N |  |
| ATOM   | 52  | C2  | DC     | A | 3 | 8.961  | -1.110 | -4.107  | 1.00 | 0.00 | C |  |
| ATOM   | 53  | O2  | DC     | A | 3 | 9.236  | -2.288 | -4.310  | 1.00 | 0.00 | O |  |
| ATOM   | 54  | N3  | DC     | A | 3 | 8.075  | -0.413 | -4.872  | 1.00 | 0.00 | N |  |
| ATOM   | 55  | C4  | DC     | A | 3 | 7.801  | 0.850  | -4.602  | 1.00 | 0.00 | C |  |
| ATOM   | 56  | N4  | DC     | A | 3 | 6.918  | 1.484  | -5.408  | 1.00 | 0.00 | N |  |
| ATOM   | 57  | C5  | DC     | A | 3 | 8.418  | 1.572  | -3.524  | 1.00 | 0.00 | C |  |
| ATOM   | 58  | C6  | DC     | A | 3 | 9.314  | 0.888  | -2.774  | 1.00 | 0.00 | C |  |

END

| COMPND | AAC | /   | M06-2X | / | H | MODEL  | /      | SINGLY IONIZED |      |      |   |  |
|--------|-----|-----|--------|---|---|--------|--------|----------------|------|------|---|--|
| ATOM   | 1   | O5' | DA     | A | 1 | 0.000  | 0.000  | 0.000          | 1.00 | 0.00 | O |  |
| ATOM   | 2   | C5' | DA     | A | 1 | 0.000  | 0.000  | 1.415          | 1.00 | 0.00 | C |  |
| ATOM   | 3   | C4' | DA     | A | 1 | 1.436  | 0.000  | 1.909          | 1.00 | 0.00 | C |  |
| ATOM   | 4   | O4' | DA     | A | 1 | 2.114  | -1.187 | 1.491          | 1.00 | 0.00 | O |  |
| ATOM   | 5   | C3' | DA     | A | 1 | 2.298  | 1.138  | 1.363          | 1.00 | 0.00 | C |  |
| ATOM   | 6   | O3' | DA     | A | 1 | 3.383  | 1.295  | 2.311          | 1.00 | 0.00 | O |  |
| ATOM   | 7   | C2' | DA     | A | 1 | 2.818  | 0.564  | 0.056          | 1.00 | 0.00 | C |  |
| ATOM   | 8   | C1' | DA     | A | 1 | 3.001  | -0.309 | 0.424          | 1.00 | 0.00 | C |  |
| ATOM   | 9   | N9  | DA     | A | 1 | 2.750  | -1.826 | -0.678         | 1.00 | 0.00 | N |  |
| ATOM   | 10  | C8  | DA     | A | 1 | 2.043  | -1.653 | -1.844         | 1.00 | 0.00 | C |  |
| ATOM   | 11  | N7  | DA     | A | 1 | 1.958  | -2.739 | -2.576         | 1.00 | 0.00 | N |  |
| ATOM   | 12  | C5  | DA     | A | 1 | 2.622  | -3.692 | -1.839         | 1.00 | 0.00 | C |  |
| ATOM   | 13  | C6  | DA     | A | 1 | 2.900  | -5.060 | -2.068         | 1.00 | 0.00 | C |  |
| ATOM   | 14  | N6  | DA     | A | 1 | 2.529  | -5.680 | -3.195         | 1.00 | 0.00 | N |  |
| ATOM   | 15  | N1  | DA     | A | 1 | 3.570  | -5.742 | -1.125         | 1.00 | 0.00 | N |  |
| ATOM   | 16  | C2  | DA     | A | 1 | 3.974  | -5.089 | -0.029         | 1.00 | 0.00 | C |  |
| ATOM   | 17  | N3  | DA     | A | 1 | 3.808  | -3.803 | 0.290          | 1.00 | 0.00 | N |  |
| ATOM   | 18  | C4  | DA     | A | 1 | 3.121  | -3.155 | -0.655         | 1.00 | 0.00 | C |  |
| ATOM   | 19  | P   | DA     | A | 2 | 4.486  | 2.433  | 2.133          | 1.00 | 0.00 | P |  |
| ATOM   | 20  | OP1 | DA     | A | 2 | 3.801  | 3.813  | 2.532          | 1.00 | 0.00 | O |  |
| ATOM   | 21  | OP2 | DA     | A | 2 | 5.109  | 2.554  | 0.799          | 1.00 | 0.00 | O |  |
| ATOM   | 22  | O5' | DA     | A | 2 | 5.471  | 2.124  | 3.341          | 1.00 | 0.00 | O |  |
| ATOM   | 23  | C5' | DA     | A | 2 | 5.625  | 0.851  | 3.991          | 1.00 | 0.00 | C |  |
| ATOM   | 24  | C4' | DA     | A | 2 | 6.649  | -0.010 | 3.288          | 1.00 | 0.00 | C |  |
| ATOM   | 25  | O4' | DA     | A | 2 | 6.102  | -0.481 | 2.051          | 1.00 | 0.00 | O |  |
| ATOM   | 26  | C3' | DA     | A | 2 | 7.966  | 0.715  | 2.918          | 1.00 | 0.00 | C |  |
| ATOM   | 27  | O3' | DA     | A | 2 | 9.018  | -0.200 | 3.277          | 1.00 | 0.00 | O |  |
| ATOM   | 28  | C2' | DA     | A | 2 | 7.874  | 0.852  | 1.402          | 1.00 | 0.00 | C |  |
| ATOM   | 29  | C1' | DA     | A | 2 | 7.151  | -0.451 | 1.095          | 1.00 | 0.00 | C |  |
| ATOM   | 30  | N9  | DA     | A | 2 | 6.563  | -0.578 | -0.221         | 1.00 | 0.00 | N |  |
| ATOM   | 31  | C8  | DA     | A | 2 | 6.019  | 0.371  | -1.023         | 1.00 | 0.00 | C |  |
| ATOM   | 32  | N7  | DA     | A | 2 | 5.462  | -0.118 | -2.139         | 1.00 | 0.00 | N |  |
| ATOM   | 33  | C5  | DA     | A | 2 | 5.670  | -1.439 | -2.054         | 1.00 | 0.00 | C |  |
| ATOM   | 34  | C6  | DA     | A | 2 | 5.366  | -2.534 | -2.927         | 1.00 | 0.00 | C |  |
| ATOM   | 35  | N6  | DA     | A | 2 | 4.719  | -2.358 | -4.057         | 1.00 | 0.00 | N |  |
| ATOM   | 36  | N1  | DA     | A | 2 | 5.755  | -3.782 | -2.563         | 1.00 | 0.00 | N |  |
| ATOM   | 37  | C2  | DA     | A | 2 | 6.389  | -3.937 | -1.422         | 1.00 | 0.00 | C |  |
| ATOM   | 38  | N3  | DA     | A | 2 | 6.717  | -2.985 | -0.486         | 1.00 | 0.00 | N |  |
| ATOM   | 39  | C4  | DA     | A | 2 | 6.354  | -1.792 | -0.858         | 1.00 | 0.00 | C |  |
| ATOM   | 40  | P   | DC     | A | 3 | 10.567 | 0.141  | 3.102          | 1.00 | 0.00 | P |  |
| ATOM   | 41  | OP1 | DC     | A | 3 | 10.866 | 1.187  | 4.269          | 1.00 | 0.00 | O |  |
| ATOM   | 42  | OP2 | DC     | A | 3 | 11.020 | 0.614  | 1.775          | 1.00 | 0.00 | O |  |
| ATOM   | 43  | O5' | DC     | A | 3 | 11.226 | -1.192 | 3.653          | 1.00 | 0.00 | O |  |
| ATOM   | 44  | C5' | DC     | A | 3 | 10.606 | -2.487 | 3.565          | 1.00 | 0.00 | C |  |
| ATOM   | 45  | C4' | DC     | A | 3 | 10.730 | -3.090 | 2.187          | 1.00 | 0.00 | C |  |
| ATOM   | 46  | O4' | DC     | A | 3 | 9.922  | -2.368 | 1.258          | 1.00 | 0.00 | O |  |
| ATOM   | 47  | C3' | DC     | A | 3 | 12.165 | -3.114 | 1.600          | 1.00 | 0.00 | C |  |

|      |    |     |    |   |   |        |        |        |      |      |   |
|------|----|-----|----|---|---|--------|--------|--------|------|------|---|
| ATOM | 48 | O3' | DC | A | 3 | 12.504 | -4.478 | 1.435  | 1.00 | 0.00 | O |
| ATOM | 49 | C2' | DC | A | 3 | 12.004 | -2.379 | 0.264  | 1.00 | 0.00 | C |
| ATOM | 50 | C1' | DC | A | 3 | 10.524 | -2.620 | -0.011 | 1.00 | 0.00 | C |
| ATOM | 51 | N1  | DC | A | 3 | 9.895  | -1.800 | -1.026 | 1.00 | 0.00 | N |
| ATOM | 52 | C2  | DC | A | 3 | 9.152  | -2.435 | -2.055 | 1.00 | 0.00 | C |
| ATOM | 53 | O2  | DC | A | 3 | 9.071  | -3.660 | -2.075 | 1.00 | 0.00 | O |
| ATOM | 54 | N3  | DC | A | 3 | 8.525  | -1.646 | -2.972 | 1.00 | 0.00 | N |
| ATOM | 55 | C4  | DC | A | 3 | 8.674  | -0.324 | -2.935 | 1.00 | 0.00 | C |
| ATOM | 56 | N4  | DC | A | 3 | 8.051  | 0.392  | -3.877 | 1.00 | 0.00 | N |
| ATOM | 57 | C5  | DC | A | 3 | 9.444  | 0.343  | -1.925 | 1.00 | 0.00 | C |
| ATOM | 58 | C6  | DC | A | 3 | 10.028 | -0.443 | -0.991 | 1.00 | 0.00 | C |
| END  |    |     |    |   |   |        |        |        |      |      |   |

| COMPND | CCA / | M06-2X / | H  | MODEL / | NEUTRAL |        |        |        |      |      |   |
|--------|-------|----------|----|---------|---------|--------|--------|--------|------|------|---|
| ATOM   | 1     | O5'      | DC | A       | 1       | 0.000  | 0.000  | 0.000  | 1.00 | 0.00 | O |
| ATOM   | 2     | C5'      | DC | A       | 1       | 0.000  | 0.000  | 1.414  | 1.00 | 0.00 | C |
| ATOM   | 3     | C4'      | DC | A       | 1       | 1.422  | 0.000  | 1.951  | 1.00 | 0.00 | C |
| ATOM   | 4     | O4'      | DC | A       | 1       | 2.072  | -1.165 | 1.435  | 1.00 | 0.00 | O |
| ATOM   | 5     | C3'      | DC | A       | 1       | 2.261  | 1.197  | 1.468  | 1.00 | 0.00 | C |
| ATOM   | 6     | O3'      | DC | A       | 1       | 3.085  | 1.588  | 2.589  | 1.00 | 0.00 | O |
| ATOM   | 7     | C2'      | DC | A       | 1       | 3.106  | 0.606  | 0.348  | 1.00 | 0.00 | C |
| ATOM   | 8     | C1'      | DC | A       | 1       | 3.345  | -0.789 | 0.908  | 1.00 | 0.00 | C |
| ATOM   | 9     | N1       | DC | A       | 1       | 3.779  | -1.816 | -0.015 | 1.00 | 0.00 | N |
| ATOM   | 10    | C2       | DC | A       | 1       | 4.344  | -2.987 | 0.570  | 1.00 | 0.00 | C |
| ATOM   | 11    | O2       | DC | A       | 1       | 4.461  | -3.031 | 1.789  | 1.00 | 0.00 | O |
| ATOM   | 12    | N3       | DC | A       | 1       | 4.722  | -3.997 | -0.261 | 1.00 | 0.00 | N |
| ATOM   | 13    | C4       | DC | A       | 1       | 4.540  | -3.892 | -1.565 | 1.00 | 0.00 | C |
| ATOM   | 14    | N4       | DC | A       | 1       | 4.990  | -4.894 | -2.341 | 1.00 | 0.00 | N |
| ATOM   | 15    | C5       | DC | A       | 1       | 3.918  | -2.754 | -2.183 | 1.00 | 0.00 | C |
| ATOM   | 16    | C6       | DC | A       | 1       | 3.561  | -1.745 | -1.359 | 1.00 | 0.00 | C |
| ATOM   | 17    | P        | DC | A       | 2       | 3.978  | 2.907  | 2.521  | 1.00 | 0.00 | P |
| ATOM   | 18    | OP1      | DC | A       | 2       | 2.968  | 4.134  | 2.390  | 1.00 | 0.00 | O |
| ATOM   | 19    | OP2      | DC | A       | 2       | 4.988  | 2.975  | 1.446  | 1.00 | 0.00 | O |
| ATOM   | 20    | O5'      | DC | A       | 2       | 4.527  | 3.005  | 4.008  | 1.00 | 0.00 | O |
| ATOM   | 21    | C5'      | DC | A       | 2       | 4.542  | 1.934  | 4.970  | 1.00 | 0.00 | C |
| ATOM   | 22    | C4'      | DC | A       | 2       | 5.816  | 1.129  | 4.856  | 1.00 | 0.00 | C |
| ATOM   | 23    | O4'      | DC | A       | 2       | 5.777  | 0.332  | 3.677  | 1.00 | 0.00 | O |
| ATOM   | 24    | C3'      | DC | A       | 2       | 7.090  | 2.002  | 4.742  | 1.00 | 0.00 | C |
| ATOM   | 25    | O3'      | DC | A       | 2       | 8.039  | 1.441  | 5.675  | 1.00 | 0.00 | O |
| ATOM   | 26    | C2'      | DC | A       | 2       | 7.536  | 1.771  | 3.305  | 1.00 | 0.00 | C |
| ATOM   | 27    | C1'      | DC | A       | 2       | 7.114  | 0.314  | 3.155  | 1.00 | 0.00 | C |
| ATOM   | 28    | N1       | DC | A       | 2       | 7.110  | -0.272 | 1.839  | 1.00 | 0.00 | N |
| ATOM   | 29    | C2       | DC | A       | 2       | 7.395  | -1.668 | 1.744  | 1.00 | 0.00 | C |
| ATOM   | 30    | O2       | DC | A       | 2       | 7.650  | -2.293 | 2.766  | 1.00 | 0.00 | O |
| ATOM   | 31    | N3       | DC | A       | 2       | 7.390  | -2.233 | 0.505  | 1.00 | 0.00 | N |
| ATOM   | 32    | C4       | DC | A       | 2       | 7.073  | -1.515 | -0.557 | 1.00 | 0.00 | C |
| ATOM   | 33    | N4       | DC | A       | 2       | 7.125  | -2.119 | -1.758 | 1.00 | 0.00 | N |
| ATOM   | 34    | C5       | DC | A       | 2       | 6.706  | -0.127 | -0.486 | 1.00 | 0.00 | C |
| ATOM   | 35    | C6       | DC | A       | 2       | 6.743  | 0.446  | 0.739  | 1.00 | 0.00 | C |
| ATOM   | 36    | P        | DA | A       | 3       | 9.462  | 2.107  | 5.943  | 1.00 | 0.00 | P |
| ATOM   | 37    | OP1      | DA | A       | 3       | 9.189  | 3.440  | 6.777  | 1.00 | 0.00 | O |
| ATOM   | 38    | OP2      | DA | A       | 3       | 10.300 | 2.424  | 4.770  | 1.00 | 0.00 | O |
| ATOM   | 39    | O5'      | DA | A       | 3       | 10.072 | 1.110  | 7.019  | 1.00 | 0.00 | O |
| ATOM   | 40    | C5'      | DA | A       | 3       | 9.701  | -0.275 | 7.144  | 1.00 | 0.00 | C |
| ATOM   | 41    | C4'      | DA | A       | 3       | 10.417 | -1.137 | 6.134  | 1.00 | 0.00 | C |
| ATOM   | 42    | O4'      | DA | A       | 3       | 9.929  | -0.845 | 4.824  | 1.00 | 0.00 | O |
| ATOM   | 43    | C3'      | DA | A       | 3       | 11.956 | -0.952 | 6.089  | 1.00 | 0.00 | C |
| ATOM   | 44    | O3'      | DA | A       | 3       | 12.519 | -2.230 | 6.324  | 1.00 | 0.00 | O |
| ATOM   | 45    | C2'      | DA | A       | 3       | 12.197 | -0.468 | 4.657  | 1.00 | 0.00 | C |
| ATOM   | 46    | C1'      | DA | A       | 3       | 11.015 | -1.116 | 3.945  | 1.00 | 0.00 | C |
| ATOM   | 47    | N9       | DA | A       | 3       | 10.721 | -0.629 | 2.625  | 1.00 | 0.00 | N |
| ATOM   | 48    | O8       | DA | A       | 3       | 10.562 | 0.678  | 2.216  | 1.00 | 0.00 | O |
| ATOM   | 49    | N7       | DA | A       | 3       | 10.300 | 0.798  | 0.939  | 1.00 | 0.00 | N |
| ATOM   | 50    | C5       | DA | A       | 3       | 10.306 | -0.503 | 0.471  | 1.00 | 0.00 | C |
| ATOM   | 51    | C6       | DA | A       | 3       | 10.124 | -1.060 | -0.810 | 1.00 | 0.00 | C |
| ATOM   | 52    | N6       | DA | A       | 3       | 9.873  | -0.291 | -1.898 | 1.00 | 0.00 | N |
| ATOM   | 53    | N1       | DA | A       | 3       | 10.240 | -2.386 | -0.959 | 1.00 | 0.00 | N |
| ATOM   | 54    | C2       | DA | A       | 3       | 10.499 | -3.128 | 0.128  | 1.00 | 0.00 | C |
| ATOM   | 55    | N3       | DA | A       | 3       | 10.679 | -2.733 | 1.384  | 1.00 | 0.00 | N |
| ATOM   | 56    | C4       | DA | A       | 3       | 10.568 | -1.405 | 1.498  | 1.00 | 0.00 | C |
| END    |       |          |    |         |         |        |        |        |      |      |   |

| COMPND | CCA / | M06-2X / | H  | MODEL / | SINGLY IONIZED |        |        |        |      |      |   |
|--------|-------|----------|----|---------|----------------|--------|--------|--------|------|------|---|
| ATOM   | 1     | O5'      | DC | A       | 1              | 0.000  | 0.000  | 0.000  | 1.00 | 0.00 | O |
| ATOM   | 2     | C5'      | DC | A       | 1              | 0.000  | 0.000  | 1.414  | 1.00 | 0.00 | C |
| ATOM   | 3     | C4'      | DC | A       | 1              | 1.421  | 0.000  | 1.953  | 1.00 | 0.00 | C |
| ATOM   | 4     | O4'      | DC | A       | 1              | 2.071  | -1.170 | 1.446  | 1.00 | 0.00 | O |
| ATOM   | 5     | C3'      | DC | A       | 1              | 2.264  | 1.194  | 1.465  | 1.00 | 0.00 | C |
| ATOM   | 6     | O3'      | DC | A       | 1              | 3.082  | 1.590  | 2.590  | 1.00 | 0.00 | O |
| ATOM   | 7     | C2'      | DC | A       | 1              | 3.114  | 0.593  | 0.356  | 1.00 | 0.00 | C |
| ATOM   | 8     | C1'      | DC | A       | 1              | 3.353  | -0.794 | 0.941  | 1.00 | 0.00 | C |
| ATOM   | 9     | N1       | DC | A       | 1              | 3.825  | -1.829 | 0.047  | 1.00 | 0.00 | N |
| ATOM   | 10    | C2       | DC | A       | 1              | 4.528  | -2.917 | 0.642  | 1.00 | 0.00 | C |
| ATOM   | 11    | O2       | DC | A       | 1              | 4.712  | -2.905 | 1.854  | 1.00 | 0.00 | O |
| ATOM   | 12    | N3       | DC | A       | 1              | 4.965  | -3.916 | -0.172 | 1.00 | 0.00 | N |
| ATOM   | 13    | C4       | DC | A       | 1              | 4.745  | -3.865 | -1.473 | 1.00 | 0.00 | C |
| ATOM   | 14    | N4       | DC | A       | 1              | 5.259  | -4.849 | -2.233 | 1.00 | 0.00 | N |
| ATOM   | 15    | C5       | DC | A       | 1              | 4.019  | -2.797 | -2.104 | 1.00 | 0.00 | C |
| ATOM   | 16    | C6       | DC | A       | 1              | 3.577  | -1.812 | -1.293 | 1.00 | 0.00 | C |
| ATOM   | 17    | P        | DC | A       | 2              | 4.037  | 2.864  | 2.525  | 1.00 | 0.00 | P |
| ATOM   | 18    | OP1      | DC | A       | 2              | 3.095  | 4.137  | 2.348  | 1.00 | 0.00 | O |
| ATOM   | 19    | OP2      | DC | A       | 2              | 5.082  | 2.871  | 1.481  | 1.00 | 0.00 | O |
| ATOM   | 20    | O5'      | DC | A       | 2              | 4.552  | 2.955  | 4.026  | 1.00 | 0.00 | O |
| ATOM   | 21    | C5'      | DC | A       | 2              | 4.493  | 1.887  | 4.987  | 1.00 | 0.00 | C |
| ATOM   | 22    | C4'      | DC | A       | 2              | 5.703  | 0.991  | 4.878  | 1.00 | 0.00 | C |
| ATOM   | 23    | O4'      | DC | A       | 2              | 5.650  | 0.245  | 3.663  | 1.00 | 0.00 | O |
| ATOM   | 24    | C3'      | DC | A       | 2              | 7.057  | 1.746  | 4.858  | 1.00 | 0.00 | C |
| ATOM   | 25    | O3'      | DC | A       | 2              | 7.880  | 1.087  | 5.846  | 1.00 | 0.00 | O |
| ATOM   | 26    | C2'      | DC | A       | 2              | 7.576  | 1.479  | 3.450  | 1.00 | 0.00 | C |
| ATOM   | 27    | C1'      | DC | A       | 2              | 7.008  | 0.078  | 3.252  | 1.00 | 0.00 | C |
| ATOM   | 28    | N1       | DC | A       | 2              | 7.060  | -0.486 | 1.925  | 1.00 | 0.00 | N |
| ATOM   | 29    | C2       | DC | A       | 2              | 7.583  | -1.795 | 1.770  | 1.00 | 0.00 | C |
| ATOM   | 30    | O2       | DC | A       | 2              | 7.991  | -2.402 | 2.758  | 1.00 | 0.00 | O |
| ATOM   | 31    | N3       | DC | A       | 2              | 7.672  | -2.301 | 0.511  | 1.00 | 0.00 | N |
| ATOM   | 32    | C4       | DC | A       | 2              | 7.233  | -1.605 | -0.526 | 1.00 | 0.00 | C |
| ATOM   | 33    | N4       | DC | A       | 2              | 7.362  | -2.161 | -1.744 | 1.00 | 0.00 | N |
| ATOM   | 34    | C5       | DC | A       | 2              | 6.679  | -0.287 | -0.401 | 1.00 | 0.00 | C |
| ATOM   | 35    | C6       | DC | A       | 2              | 6.619  | 0.228  | 0.849  | 1.00 | 0.00 | C |
| ATOM   | 36    | P        | DA | A       | 3              | 9.349  | 1.584  | 6.216  | 1.00 | 0.00 | P |
| ATOM   | 37    | OP1      | DA | A       | 3              | 9.199  | 3.018  | 6.891  | 1.00 | 0.00 | O |
| ATOM   | 38    | OP2      | DA | A       | 3              | 10.325 | 1.655  | 5.108  | 1.00 | 0.00 | O |
| ATOM   | 39    | O5'      | DA | A       | 3              | 9.711  | 0.621  | 7.425  | 1.00 | 0.00 | O |
| ATOM   | 40    | C5'      | DA | A       | 3              | 9.128  | -0.673 | 7.657  | 1.00 | 0.00 | C |
| ATOM   | 41    | C4'      | DA | A       | 3              | 9.873  | -1.753 | 6.911  | 1.00 | 0.00 | C |
| ATOM   | 42    | O4'      | DA | A       | 3              | 9.620  | -1.624 | 5.506  | 1.00 | 0.00 | O |
| ATOM   | 43    | C3'      | DA | A       | 3              | 11.412 | -1.731 | 7.089  | 1.00 | 0.00 | C |
| ATOM   | 44    | O3'      | DA | A       | 3              | 11.782 | -3.025 | 7.526  | 1.00 | 0.00 | O |
| ATOM   | 45    | C2'      | DA | A       | 3              | 11.913 | -1.442 | 5.671  | 1.00 | 0.00 | C |

|      |    |     |    |   |   |        |        |        |      |      |  |   |
|------|----|-----|----|---|---|--------|--------|--------|------|------|--|---|
| ATOM | 46 | C1' | DA | A | 3 | 10.793 | -2.083 | 4.864  | 1.00 | 0.00 |  | C |
| ATOM | 47 | N9  | DA | A | 3 | 10.733 | -1.712 | 3.463  | 1.00 | 0.00 |  | N |
| ATOM | 48 | C8  | DA | A | 3 | 10.555 | -0.476 | 2.958  | 1.00 | 0.00 |  | C |
| ATOM | 49 | N7  | DA | A | 3 | 10.442 | -0.446 | 1.614  | 1.00 | 0.00 |  | N |
| ATOM | 50 | C5  | DA | A | 3 | 10.554 | -1.724 | 1.256  | 1.00 | 0.00 |  | C |
| ATOM | 51 | C6  | DA | A | 3 | 10.522 | -2.387 | -0.016 | 1.00 | 0.00 |  | C |
| ATOM | 52 | N6  | DA | A | 3 | 10.409 | -1.722 | -1.141 | 1.00 | 0.00 |  | N |
| ATOM | 53 | N1  | DA | A | 3 | 10.639 | -3.741 | -0.048 | 1.00 | 0.00 |  | N |
| ATOM | 54 | C2  | DA | A | 3 | 10.786 | -4.381 | 1.088  | 1.00 | 0.00 |  | C |
| ATOM | 55 | N3  | DA | A | 3 | 10.853 | -3.873 | 2.364  | 1.00 | 0.00 |  | N |
| ATOM | 56 | C4  | DA | A | 3 | 10.720 | -2.582 | 2.387  | 1.00 | 0.00 |  | C |
| END  |    |     |    |   |   |        |        |        |      |      |  |   |

|        |                                  |     |    |   |   |        |        |        |      |      |  |   |
|--------|----------------------------------|-----|----|---|---|--------|--------|--------|------|------|--|---|
| COMPND | CAA / M06-2X / H MODEL / NEUTRAL |     |    |   |   |        |        |        |      |      |  |   |
| ATOM   | 1                                | O5' | DC | A | 1 | 0.000  | 0.000  | 0.000  | 1.00 | 0.00 |  | O |
| ATOM   | 2                                | C5' | DC | A | 1 | 0.000  | 0.000  | 1.417  | 1.00 | 0.00 |  | C |
| ATOM   | 3                                | C4' | DC | A | 1 | 1.439  | 0.000  | 1.896  | 1.00 | 0.00 |  | C |
| ATOM   | 4                                | O4' | DC | A | 1 | 2.059  | -1.243 | 1.567  | 1.00 | 0.00 |  | O |
| ATOM   | 5                                | C3' | DC | A | 1 | 2.295  | 1.083  | 1.229  | 1.00 | 0.00 |  | C |
| ATOM   | 6                                | O3' | DC | A | 1 | 3.297  | 1.475  | 2.200  | 1.00 | 0.00 |  | O |
| ATOM   | 7                                | C2' | DC | A | 1 | 2.945  | 0.342  | 0.075  | 1.00 | 0.00 |  | C |
| ATOM   | 8                                | C1' | DC | A | 1 | 3.158  | -1.043 | 0.684  | 1.00 | 0.00 |  | C |
| ATOM   | 9                                | N1  | DC | A | 1 | 3.192  | -2.123 | -0.285 | 1.00 | 0.00 |  | N |
| ATOM   | 10                               | C2  | DC | A | 1 | 4.216  | -3.101 | -0.200 | 1.00 | 0.00 |  | C |
| ATOM   | 11                               | O2  | DC | A | 1 | 5.002  | -3.068 | 0.742  | 1.00 | 0.00 |  | O |
| ATOM   | 12                               | N3  | DC | A | 1 | 4.281  | -4.032 | -1.192 | 1.00 | 0.00 |  | N |
| ATOM   | 13                               | C4  | DC | A | 1 | 3.341  | -4.085 | -2.121 | 1.00 | 0.00 |  | C |
| ATOM   | 14                               | N4  | DC | A | 1 | 3.482  | -4.995 | -3.099 | 1.00 | 0.00 |  | N |
| ATOM   | 15                               | C5  | DC | A | 1 | 2.190  | -3.224 | -2.122 | 1.00 | 0.00 |  | C |
| ATOM   | 16                               | C6  | DC | A | 1 | 2.168  | -2.257 | -1.179 | 1.00 | 0.00 |  | C |
| ATOM   | 17                               | P   | DA | A | 2 | 4.203  | 2.751  | 1.914  | 1.00 | 0.00 |  | P |
| ATOM   | 18                               | OP2 | DA | A | 2 | 4.920  | 2.803  | 0.620  | 1.00 | 0.00 |  | O |
| ATOM   | 19                               | OP1 | DA | A | 2 | 3.203  | 3.980  | 2.111  | 1.00 | 0.00 |  | O |
| ATOM   | 20                               | O5' | DA | A | 2 | 5.110  | 2.814  | 3.214  | 1.00 | 0.00 |  | O |
| ATOM   | 21                               | C5' | DA | A | 2 | 5.401  | 1.711  | 4.087  | 1.00 | 0.00 |  | C |
| ATOM   | 22                               | C4' | DA | A | 2 | 6.606  | 0.937  | 3.606  | 1.00 | 0.00 |  | C |
| ATOM   | 23                               | O4' | DA | A | 2 | 6.250  | 0.186  | 2.445  | 1.00 | 0.00 |  | O |
| ATOM   | 24                               | C3' | DA | A | 2 | 7.813  | 1.818  | 3.195  | 1.00 | 0.00 |  | C |
| ATOM   | 25                               | O3' | DA | A | 2 | 8.963  | 1.219  | 3.838  | 1.00 | 0.00 |  | O |
| ATOM   | 26                               | C2' | DA | A | 2 | 7.871  | 1.633  | 1.684  | 1.00 | 0.00 |  | C |
| ATOM   | 27                               | C1' | DA | A | 2 | 7.390  | 0.193  | 1.587  | 1.00 | 0.00 |  | C |
| ATOM   | 28                               | N9  | DA | A | 2 | 7.025  | -0.286 | 0.290  | 1.00 | 0.00 |  | N |
| ATOM   | 29                               | C8  | DA | A | 2 | 6.337  | 0.357  | -0.713 | 1.00 | 0.00 |  | C |
| ATOM   | 30                               | N7  | DA | A | 2 | 6.174  | -0.377 | -1.786 | 1.00 | 0.00 |  | N |
| ATOM   | 31                               | C5  | DA | A | 2 | 6.805  | -1.570 | -1.477 | 1.00 | 0.00 |  | C |
| ATOM   | 32                               | C6  | DA | A | 2 | 7.019  | -2.757 | -2.200 | 1.00 | 0.00 |  | C |
| ATOM   | 33                               | N6  | DA | A | 2 | 6.572  | -2.915 | -3.472 | 1.00 | 0.00 |  | N |
| ATOM   | 34                               | N1  | DA | A | 2 | 7.748  | -3.730 | -1.637 | 1.00 | 0.00 |  | N |
| ATOM   | 35                               | C2  | DA | A | 2 | 8.231  | -3.533 | -0.402 | 1.00 | 0.00 |  | C |
| ATOM   | 36                               | N3  | DA | A | 2 | 8.082  | -2.476 | 0.391  | 1.00 | 0.00 |  | N |
| ATOM   | 37                               | C4  | DA | A | 2 | 7.351  | -1.529 | -0.200 | 1.00 | 0.00 |  | C |
| ATOM   | 38                               | P   | DA | A | 3 | 10.430 | 1.819  | 3.668  | 1.00 | 0.00 |  | P |
| ATOM   | 39                               | OP2 | DA | A | 3 | 10.610 | 2.860  | 2.642  | 1.00 | 0.00 |  | O |
| ATOM   | 40                               | OP1 | DA | A | 3 | 10.748 | 2.212  | 5.181  | 1.00 | 0.00 |  | O |
| ATOM   | 41                               | O5' | DA | A | 3 | 11.321 | 0.535  | 3.344  | 1.00 | 0.00 |  | O |
| ATOM   | 42                               | C5' | DA | A | 3 | 11.244 | -0.648 | 4.160  | 1.00 | 0.00 |  | C |
| ATOM   | 43                               | C4' | DA | A | 3 | 11.968 | -1.764 | 3.436  | 1.00 | 0.00 |  | C |
| ATOM   | 44                               | O4' | DA | A | 3 | 11.265 | -2.078 | 2.233  | 1.00 | 0.00 |  | O |
| ATOM   | 45                               | C3' | DA | A | 3 | 13.408 | -1.439 | 3.019  | 1.00 | 0.00 |  | C |
| ATOM   | 46                               | O3' | DA | A | 3 | 14.117 | -2.663 | 3.086  | 1.00 | 0.00 |  | O |
| ATOM   | 47                               | C2  | DA | A | 3 | 13.238 | -0.974 | 1.577  | 1.00 | 0.00 |  | C |
| ATOM   | 48                               | C1' | DA | A | 3 | 12.089 | -1.861 | 1.098  | 1.00 | 0.00 |  | C |
| ATOM   | 49                               | N9  | DA | A | 3 | 11.288 | -1.269 | 0.048  | 1.00 | 0.00 |  | N |
| ATOM   | 50                               | C8  | DA | A | 3 | 10.600 | -0.080 | 0.108  | 1.00 | 0.00 |  | C |
| ATOM   | 51                               | N7  | DA | A | 3 | 9.889  | 0.175  | -0.960 | 1.00 | 0.00 |  | N |
| ATOM   | 52                               | C5  | DA | A | 3 | 10.118 | -0.916 | -1.778 | 1.00 | 0.00 |  | C |
| ATOM   | 53                               | C6  | DA | A | 3 | 9.635  | -1.279 | -3.051 | 1.00 | 0.00 |  | C |
| ATOM   | 54                               | N6  | DA | A | 3 | 8.779  | -0.496 | -3.757 | 1.00 | 0.00 |  | N |
| ATOM   | 55                               | N1  | DA | A | 3 | 10.059 | -2.429 | -3.596 | 1.00 | 0.00 |  | N |
| ATOM   | 56                               | C2  | DA | A | 3 | 10.892 | -3.204 | -2.887 | 1.00 | 0.00 |  | C |
| ATOM   | 57                               | N3  | DA | A | 3 | 11.393 | -2.995 | -1.673 | 1.00 | 0.00 |  | N |
| ATOM   | 58                               | C4  | DA | A | 3 | 10.975 | -1.829 | -1.167 | 1.00 | 0.00 |  | C |
| END    |                                  |     |    |   |   |        |        |        |      |      |  |   |

|        |                                         |     |    |   |   |        |        |        |      |      |  |   |
|--------|-----------------------------------------|-----|----|---|---|--------|--------|--------|------|------|--|---|
| COMPND | CAA / M06-2X / H MODEL / SINGLY IONIZED |     |    |   |   |        |        |        |      |      |  |   |
| ATOM   | 1                                       | O5' | DC | A | 1 | 0.000  | 0.000  | 0.000  | 1.00 | 0.00 |  | O |
| ATOM   | 2                                       | C5' | DC | A | 1 | 0.000  | 0.000  | 1.417  | 1.00 | 0.00 |  | C |
| ATOM   | 3                                       | C4' | DC | A | 1 | 1.439  | 0.000  | 1.894  | 1.00 | 0.00 |  | C |
| ATOM   | 4                                       | O4' | DC | A | 1 | 2.063  | -1.244 | 1.569  | 1.00 | 0.00 |  | O |
| ATOM   | 5                                       | C3' | DC | A | 1 | 2.302  | 1.081  | 1.235  | 1.00 | 0.00 |  | C |
| ATOM   | 6                                       | O3' | DC | A | 1 | 3.291  | 1.462  | 2.223  | 1.00 | 0.00 |  | O |
| ATOM   | 7                                       | C2' | DC | A | 1 | 2.966  | 0.340  | 0.088  | 1.00 | 0.00 |  | C |
| ATOM   | 8                                       | C1' | DC | A | 1 | 3.166  | -1.046 | 0.699  | 1.00 | 0.00 |  | C |
| ATOM   | 9                                       | N1  | DC | A | 1 | 3.175  | -2.127 | -0.280 | 1.00 | 0.00 |  | N |
| ATOM   | 10                                      | C2  | DC | A | 1 | 4.323  | -2.929 | -0.427 | 1.00 | 0.00 |  | C |
| ATOM   | 11                                      | O2  | DC | A | 1 | 5.313  | -2.691 | 0.274  | 1.00 | 0.00 |  | O |
| ATOM   | 12                                      | N3  | DC | A | 1 | 4.297  | -3.927 | -1.345 | 1.00 | 0.00 |  | N |
| ATOM   | 13                                      | C4  | DC | A | 1 | 3.202  | -4.142 | -2.066 | 1.00 | 0.00 |  | C |
| ATOM   | 14                                      | N4  | DC | A | 1 | 3.241  | -5.131 | -2.969 | 1.00 | 0.00 |  | N |
| ATOM   | 15                                      | C5  | DC | A | 1 | 2.002  | -3.371 | -1.909 | 1.00 | 0.00 |  | C |
| ATOM   | 16                                      | C6  | DC | A | 1 | 2.042  | -2.374 | -0.997 | 1.00 | 0.00 |  | C |
| ATOM   | 17                                      | P   | DA | A | 2 | 4.191  | 2.751  | 1.981  | 1.00 | 0.00 |  | P |
| ATOM   | 18                                      | OP1 | DA | A | 2 | 3.167  | 3.969  | 2.083  | 1.00 | 0.00 |  | O |
| ATOM   | 19                                      | OP2 | DA | A | 2 | 4.998  | 2.783  | 0.741  | 1.00 | 0.00 |  | O |
| ATOM   | 20                                      | O5' | DA | A | 2 | 4.996  | 2.848  | 3.344  | 1.00 | 0.00 |  | O |
| ATOM   | 21                                      | C5' | DA | A | 2 | 5.277  | 1.754  | 4.234  | 1.00 | 0.00 |  | C |
| ATOM   | 22                                      | C4' | DA | A | 2 | 6.615  | 1.127  | 3.913  | 1.00 | 0.00 |  | C |
| ATOM   | 23                                      | O4' | DA | A | 2 | 6.506  | 0.355  | 2.712  | 1.00 | 0.00 |  | O |
| ATOM   | 24                                      | C3' | DA | A | 2 | 7.741  | 2.150  | 3.653  | 1.00 | 0.00 |  | C |
| ATOM   | 25                                      | O3' | DA | A | 2 | 8.919  | 1.616  | 4.292  | 1.00 | 0.00 |  | O |
| ATOM   | 26                                      | C2' | DA | A | 2 | 7.929  | 2.090  | 2.141  | 1.00 | 0.00 |  | C |
| ATOM   | 27                                      | C1' | DA | A | 2 | 7.676  | 0.601  | 1.946  | 1.00 | 0.00 |  | C |
| ATOM   | 28                                      | N9  | DA | A | 2 | 7.437  | 0.118  | 0.603  | 1.00 | 0.00 |  | N |
| ATOM   | 29                                      | C8  | DA | A | 2 | 6.775  | 0.697  | -0.430 | 1.00 | 0.00 |  | C |
| ATOM   | 30                                      | N7  | DA | A | 2 | 6.590  | -0.119 | -1.479 | 1.00 | 0.00 |  | N |
| ATOM   | 31                                      | C5  | DA | A | 2 | 7.155  | -1.268 | -1.100 | 1.00 | 0.00 |  | C |
| ATOM   | 32                                      | C6  | DA | A | 2 | 7.260  | -2.558 | -1.719 | 1.00 | 0.00 |  | C |
| ATOM   | 33                                      | N6  | DA | A | 2 | 6.757  | -2.792 | -2.909 | 1.00 | 0.00 |  | N |
| ATOM   | 34                                      | N1  | DA | A | 2 | 7.884  | -3.555 | -1.046 | 1.00 | 0.00 |  | N |
| ATOM   | 35                                      | C2  | DA | A | 2 | 8.330  | -3.306 | 0.166  | 1.00 | 0.00 |  | C |
| ATOM   | 36                                      | N3  | DA | A | 2 | 8.273  | -2.141 | 0.883  | 1.00 | 0.00 |  | N |
| ATOM   | 37                                      | C4  | DA | A | 2 | 7.698  | -1.185 | 0.214  | 1.00 | 0.00 |  | C |
| ATOM   | 38                                      | P   | DA | A | 3 | 10.136 | 2.566  | 4.687  | 1.00 | 0.00 |  | P |
| ATOM   | 39                                      | OP1 | DA | A | 3 | 9.631  | 3.139  | 6.088  | 1.00 | 0.00 |  | O |
| ATOM   | 40                                      | OP2 | DA | A | 3 | 10.559 | 3.570  | 3.694  | 1.00 | 0.00 |  | O |
| ATOM   | 41                                      | O5' | DA | A | 3 | 11.283 | 1.506  | 4.986  | 1.00 | 0.00 |  | O |
| ATOM   | 42                                      | C5' | DA | A | 3 | 11.033 | 0.320  | 5.767  | 1.00 | 0.00 |  | C |
| ATOM   | 43                                      | C4' | DA | A | 3 | 11.729 | -0.848 | 5.097  | 1.00 | 0.00 |  | C |

|      |    |     |    |   |   |        |        |        |      |      |   |
|------|----|-----|----|---|---|--------|--------|--------|------|------|---|
| ATOM | 44 | O4' | DA | A | 3 | 11.206 | -1.007 | 3.777  | 1.00 | 0.00 | O |
| ATOM | 45 | C3' | DA | A | 3 | 13.249 | -0.709 | 4.944  | 1.00 | 0.00 | C |
| ATOM | 46 | O3' | DA | A | 3 | 13.774 | -2.020 | 5.053  | 1.00 | 0.00 | O |
| ATOM | 47 | C2' | DA | A | 3 | 13.395 | -0.169 | 3.525  | 1.00 | 0.00 | C |
| ATOM | 48 | C1' | DA | A | 3 | 12.240 | -0.867 | 2.812  | 1.00 | 0.00 | C |
| ATOM | 49 | N9  | DA | A | 3 | 11.716 | -0.132 | 1.679  | 1.00 | 0.00 | N |
| ATOM | 50 | C8  | DA | A | 3 | 11.387 | 1.202  | 1.634  | 1.00 | 0.00 | C |
| ATOM | 51 | N7  | DA | A | 3 | 10.766 | 1.554  | 0.535  | 1.00 | 0.00 | N |
| ATOM | 52 | C5  | DA | A | 3 | 10.670 | 0.382  | -0.181 | 1.00 | 0.00 | C |
| ATOM | 53 | C6  | DA | A | 3 | 10.074 | 0.074  | -1.424 | 1.00 | 0.00 | C |
| ATOM | 54 | N6  | DA | A | 3 | 9.428  | 0.999  | -2.146 | 1.00 | 0.00 | N |
| ATOM | 55 | N1  | DA | A | 3 | 10.125 | -1.198 | -1.861 | 1.00 | 0.00 | N |
| ATOM | 56 | C2  | DA | A | 3 | 10.763 | -2.107 | -1.105 | 1.00 | 0.00 | C |
| ATOM | 57 | N3  | DA | A | 3 | 11.336 | -1.948 | 0.085  | 1.00 | 0.00 | N |
| ATOM | 58 | C4  | DA | A | 3 | 11.249 | -0.680 | 0.506  | 1.00 | 0.00 | C |

END

| COMPND | ACC | /   | M06-2X | / | NA | MODEL  | /      | NEUTRAL |      |      |   |
|--------|-----|-----|--------|---|----|--------|--------|---------|------|------|---|
| ATOM   | 1   | O5' | DA     | A | 1  | 7.107  | 0.774  | -0.532  | 1.00 | 0.00 | O |
| ATOM   | 2   | C5' | DA     | A | 1  | 6.770  | 1.663  | -1.581  | 1.00 | 0.00 | C |
| ATOM   | 3   | C4' | DA     | A | 1  | 5.261  | 1.822  | -1.641  | 1.00 | 0.00 | C |
| ATOM   | 4   | O4' | DA     | A | 1  | 4.650  | 0.568  | -1.961  | 1.00 | 0.00 | O |
| ATOM   | 5   | C3' | DA     | A | 1  | 4.607  | 2.257  | -0.326  | 1.00 | 0.00 | C |
| ATOM   | 6   | O3' | DA     | A | 1  | 3.372  | 2.891  | -0.685  | 1.00 | 0.00 | O |
| ATOM   | 7   | C2' | DA     | A | 1  | 4.335  | 0.923  | 0.349   | 1.00 | 0.00 | C |
| ATOM   | 8   | C1' | DA     | A | 1  | 3.900  | 0.090  | -0.852  | 1.00 | 0.00 | C |
| ATOM   | 9   | N9  | DA     | A | 1  | 4.108  | -1.333 | -0.684  | 1.00 | 0.00 | N |
| ATOM   | 10  | C8  | DA     | A | 1  | 5.063  | -1.990 | 0.057   | 1.00 | 0.00 | C |
| ATOM   | 11  | N7  | DA     | A | 1  | 4.888  | -3.286 | 0.115   | 1.00 | 0.00 | N |
| ATOM   | 12  | C5  | DA     | A | 1  | 3.755  | -3.501 | -0.646  | 1.00 | 0.00 | C |
| ATOM   | 13  | C6  | DA     | A | 1  | 2.995  | -4.652 | -0.929  | 1.00 | 0.00 | C |
| ATOM   | 14  | N6  | DA     | A | 1  | 3.273  | -5.848 | -0.356  | 1.00 | 0.00 | N |
| ATOM   | 15  | N1  | DA     | A | 1  | 1.930  | -4.541 | -1.733  | 1.00 | 0.00 | N |
| ATOM   | 16  | C2  | DA     | A | 1  | 1.590  | -3.322 | -2.175  | 1.00 | 0.00 | C |
| ATOM   | 17  | N3  | DA     | A | 1  | 2.179  | -2.155 | -1.932  | 1.00 | 0.00 | N |
| ATOM   | 18  | C4  | DA     | A | 1  | 3.260  | -2.306 | -1.159  | 1.00 | 0.00 | C |
| ATOM   | 19  | P   | DC     | A | 2  | 2.464  | 3.610  | 0.456   | 1.00 | 0.00 | P |
| ATOM   | 20  | OP1 | DC     | A | 2  | 3.094  | 4.898  | 0.918   | 1.00 | 0.00 | O |
| ATOM   | 21  | OP2 | DC     | A | 2  | 2.127  | 2.659  | 1.585   | 1.00 | 0.00 | O |
| ATOM   | 22  | O5' | DC     | A | 2  | 1.159  | 3.958  | -0.431  | 1.00 | 0.00 | O |
| ATOM   | 23  | C5' | DC     | A | 2  | 0.772  | 3.348  | -1.662  | 1.00 | 0.00 | C |
| ATOM   | 24  | C4' | DC     | A | 2  | -0.236 | 2.234  | -1.468  | 1.00 | 0.00 | C |
| ATOM   | 25  | O4' | DC     | A | 2  | 0.424  | 1.036  | -1.052  | 1.00 | 0.00 | O |
| ATOM   | 26  | C3' | DC     | A | 2  | -1.306 | 2.532  | -0.390  | 1.00 | 0.00 | C |
| ATOM   | 27  | O3' | DC     | A | 2  | -2.576 | 2.160  | -0.938  | 1.00 | 0.00 | O |
| ATOM   | 28  | C2' | DC     | A | 2  | -0.922 | 1.577  | 0.732   | 1.00 | 0.00 | C |
| ATOM   | 29  | C1' | DC     | A | 2  | -0.442 | 0.401  | -0.110  | 1.00 | 0.00 | C |
| ATOM   | 30  | N1  | DC     | A | 2  | 0.272  | -0.668 | 0.553   | 1.00 | 0.00 | N |
| ATOM   | 31  | C2  | DC     | A | 2  | -0.053 | -2.015 | 0.224   | 1.00 | 0.00 | C |
| ATOM   | 32  | O2  | DC     | A | 2  | -0.956 | -2.241 | -0.574  | 1.00 | 0.00 | O |
| ATOM   | 33  | N3  | DC     | A | 2  | 0.666  | -3.004 | 0.828   | 1.00 | 0.00 | N |
| ATOM   | 34  | C4  | DC     | A | 2  | 1.655  | -2.710 | 1.650   | 1.00 | 0.00 | C |
| ATOM   | 35  | N4  | DC     | A | 2  | 2.315  | -3.742 | 2.228   | 1.00 | 0.00 | N |
| ATOM   | 36  | C5  | DC     | A | 2  | 2.024  | -1.363 | 1.981   | 1.00 | 0.00 | C |
| ATOM   | 37  | C6  | DC     | A | 2  | 1.298  | -0.377 | 1.398   | 1.00 | 0.00 | C |
| ATOM   | 38  | P   | DC     | A | 3  | -3.939 | 2.689  | -0.210  | 1.00 | 0.00 | P |
| ATOM   | 39  | OP1 | DC     | A | 3  | -4.372 | 3.999  | -0.814  | 1.00 | 0.00 | O |
| ATOM   | 40  | OP2 | DC     | A | 3  | -3.805 | 2.663  | 1.290   | 1.00 | 0.00 | O |
| ATOM   | 41  | O5' | DC     | A | 3  | -4.933 | 1.476  | -0.627  | 1.00 | 0.00 | O |
| ATOM   | 42  | C5' | DC     | A | 3  | -5.043 | 1.084  | -1.995  | 1.00 | 0.00 | C |
| ATOM   | 43  | C4' | DC     | A | 3  | -5.432 | -0.379 | -2.032  | 1.00 | 0.00 | C |
| ATOM   | 44  | O4  | DC     | A | 3  | -4.391 | -1.144 | -1.420  | 1.00 | 0.00 | O |
| ATOM   | 45  | C3' | DC     | A | 3  | -6.726 | -0.717 | -1.276  | 1.00 | 0.00 | C |
| ATOM   | 46  | O3' | DC     | A | 3  | -7.368 | -1.738 | -2.021  | 1.00 | 0.00 | O |
| ATOM   | 47  | C2' | DC     | A | 3  | -6.207 | -1.241 | 0.058   | 1.00 | 0.00 | C |
| ATOM   | 48  | C1' | DC     | A | 3  | -4.925 | -1.947 | -0.376  | 1.00 | 0.00 | C |
| ATOM   | 49  | N1  | DC     | A | 3  | -3.926 | -2.089 | 0.672   | 1.00 | 0.00 | N |
| ATOM   | 50  | C2  | DC     | A | 3  | -3.428 | -3.380 | 0.987   | 1.00 | 0.00 | C |
| ATOM   | 51  | O2  | DC     | A | 3  | -3.868 | -4.357 | 0.387   | 1.00 | 0.00 | O |
| ATOM   | 52  | N3  | DC     | A | 3  | -2.487 | -3.479 | 1.968   | 1.00 | 0.00 | N |
| ATOM   | 53  | C4  | DC     | A | 3  | -2.038 | -2.396 | 2.572   | 1.00 | 0.00 | C |
| ATOM   | 54  | N4  | DC     | A | 3  | -1.091 | -2.550 | 3.524   | 1.00 | 0.00 | N |
| ATOM   | 55  | C5  | DC     | A | 3  | -2.523 | -1.077 | 2.281   | 1.00 | 0.00 | C |
| ATOM   | 56  | C6  | DC     | A | 3  | -3.449 | -0.979 | 1.299   | 1.00 | 0.00 | C |

END

| COMPND | ACC | /   | M06-2X | / | NA | MODEL  | /      | SINGLY IONIZED |      |      |   |
|--------|-----|-----|--------|---|----|--------|--------|----------------|------|------|---|
| ATOM   | 1   | O5' | DA     | A | 1  | 6.783  | 0.071  | -0.671         | 1.00 | 0.00 | O |
| ATOM   | 2   | C5' | DA     | A | 1  | 6.629  | 1.032  | -1.702         | 1.00 | 0.00 | C |
| ATOM   | 3   | C4' | DA     | A | 1  | 5.176  | 1.466  | -1.774         | 1.00 | 0.00 | C |
| ATOM   | 4   | O4' | DA     | A | 1  | 4.339  | 0.336  | -2.059         | 1.00 | 0.00 | O |
| ATOM   | 5   | C3' | DA     | A | 1  | 4.595  | 2.049  | -0.483         | 1.00 | 0.00 | C |
| ATOM   | 6   | O3' | DA     | A | 1  | 3.452  | 2.815  | -0.881         | 1.00 | 0.00 | O |
| ATOM   | 7   | C2' | DA     | A | 1  | 4.148  | 0.799  | 0.257          | 1.00 | 0.00 | C |
| ATOM   | 8   | C1' | DA     | A | 1  | 3.605  | -0.022 | -0.909         | 1.00 | 0.00 | C |
| ATOM   | 9   | N9  | DA     | A | 1  | 3.699  | -1.470 | -0.694         | 1.00 | 0.00 | N |
| ATOM   | 10  | C8  | DA     | A | 1  | 4.606  | -2.192 | -0.003         | 1.00 | 0.00 | C |
| ATOM   | 11  | N7  | DA     | A | 1  | 4.349  | -3.512 | 0.028          | 1.00 | 0.00 | N |
| ATOM   | 12  | C5  | DA     | A | 1  | 3.229  | -3.636 | -0.685         | 1.00 | 0.00 | C |
| ATOM   | 13  | C6  | DA     | A | 1  | 2.392  | -4.755 | -1.016         | 1.00 | 0.00 | C |
| ATOM   | 14  | N6  | DA     | A | 1  | 2.660  | -5.968 | -0.588         | 1.00 | 0.00 | N |
| ATOM   | 15  | N1  | DA     | A | 1  | 1.303  | -4.544 | -1.794         | 1.00 | 0.00 | N |
| ATOM   | 16  | C2  | DA     | A | 1  | 1.049  | -3.321 | -2.203         | 1.00 | 0.00 | C |
| ATOM   | 17  | N3  | DA     | A | 1  | 1.757  | -2.169 | -1.962         | 1.00 | 0.00 | N |
| ATOM   | 18  | C4  | DA     | A | 1  | 2.785  | -2.380 | -1.196         | 1.00 | 0.00 | C |
| ATOM   | 19  | P   | DC     | A | 2  | 2.578  | 3.662  | 0.202          | 1.00 | 0.00 | P |
| ATOM   | 20  | OP1 | DC     | A | 2  | 3.226  | 4.987  | 0.507          | 1.00 | 0.00 | O |
| ATOM   | 21  | OP2 | DC     | A | 2  | 2.262  | 2.840  | 1.432          | 1.00 | 0.00 | O |
| ATOM   | 22  | O5' | DC     | A | 2  | 1.254  | 3.934  | -0.685         | 1.00 | 0.00 | O |
| ATOM   | 23  | C5' | DC     | A | 2  | 0.820  | 3.203  | -1.831         | 1.00 | 0.00 | C |
| ATOM   | 24  | C4' | DC     | A | 2  | -0.205 | 2.139  | -1.493         | 1.00 | 0.00 | C |
| ATOM   | 25  | O4' | DC     | A | 2  | 0.450  | 0.987  | -0.956         | 1.00 | 0.00 | O |
| ATOM   | 26  | C3' | DC     | A | 2  | -1.251 | 2.563  | -0.437         | 1.00 | 0.00 | C |
| ATOM   | 27  | O3' | DC     | A | 2  | -2.519 | 2.082  | -0.893         | 1.00 | 0.00 | O |
| ATOM   | 28  | C2' | DC     | A | 2  | -0.814 | 1.782  | 0.799          | 1.00 | 0.00 | C |
| ATOM   | 29  | C1' | DC     | A | 2  | -0.370 | 0.500  | 0.107          | 1.00 | 0.00 | C |
| ATOM   | 30  | N1  | DC     | A | 2  | 0.381  | -0.480 | 0.866          | 1.00 | 0.00 | N |
| ATOM   | 31  | C2  | DC     | A | 2  | 0.217  | -1.850 | 0.524          | 1.00 | 0.00 | C |
| ATOM   | 32  | O2  | DC     | A | 2  | -0.597 | -2.158 | -0.344         | 1.00 | 0.00 | O |
| ATOM   | 33  | N3  | DC     | A | 2  | 1.002  | -2.768 | 1.152          | 1.00 | 0.00 | N |
| ATOM   | 34  | C4  | DC     | A | 2  | 1.851  | -2.385 | 2.103          | 1.00 | 0.00 | C |
| ATOM   | 35  | N4  | DC     | A | 2  | 2.572  | -3.339 | 2.704          | 1.00 | 0.00 | N |
| ATOM   | 36  | C5  | DC     | A | 2  | 2.029  | -1.014 | 2.478          | 1.00 | 0.00 | C |
| ATOM   | 37  | C6  | DC     | A | 2  | 1.278  | -0.100 | 1.817          | 1.00 | 0.00 | C |
| ATOM   | 38  | P   | DC     | A | 3  | -3.887 | 2.637  | -0.200         | 1.00 | 0.00 | P |
| ATOM   | 39  | OP1 | DC     | A | 3  | -4.233 | 3.996  | -0.752         | 1.00 | 0.00 | O |
| ATOM   | 40  | OP2 | DC     | A | 3  | -3.830 | 2.536  | 1.303          | 1.00 | 0.00 | O |
| ATOM   | 41  | O5' | DC     | A | 3  | -4.901 | 1.482  | -0.717         | 1.00 | 0.00 | O |
| ATOM   | 42  | C5' | DC     | A | 3  | -4.900 | 1.057  | -2.081         | 1.00 | 0.00 | C |



|      |    |     |    |   |   |        |        |        |      |      |   |
|------|----|-----|----|---|---|--------|--------|--------|------|------|---|
| ATOM | 43 | C4' | DC | A | 3 | -5.154 | -0.436 | -2.112 | 1.00 | 0.00 | C |
| ATOM | 44 | O4' | DC | A | 3 | -4.100 | -1.101 | -1.412 | 1.00 | 0.00 | O |
| ATOM | 45 | C3' | DC | A | 3 | -6.468 | -0.877 | -1.447 | 1.00 | 0.00 | C |
| ATOM | 46 | O3' | DC | A | 3 | -6.961 | -1.960 | -2.218 | 1.00 | 0.00 | O |
| ATOM | 47 | C2' | DC | A | 3 | -6.006 | -1.336 | -0.069 | 1.00 | 0.00 | C |
| ATOM | 48 | C1' | DC | A | 3 | -4.642 | -1.937 | -0.396 | 1.00 | 0.00 | C |
| ATOM | 49 | N1  | DC | A | 3 | -3.714 | -1.984 | 0.723  | 1.00 | 0.00 | N |
| ATOM | 50 | C2  | DC | A | 3 | -3.133 | -3.224 | 1.097  | 1.00 | 0.00 | C |
| ATOM | 51 | O2  | DC | A | 3 | -3.447 | -4.242 | 0.488  | 1.00 | 0.00 | O |
| ATOM | 52 | N3  | DC | A | 3 | -2.260 | -3.228 | 2.143  | 1.00 | 0.00 | N |
| ATOM | 53 | C4  | DC | A | 3 | -1.945 | -2.099 | 2.753  | 1.00 | 0.00 | C |
| ATOM | 54 | N4  | DC | A | 3 | -1.038 | -2.154 | 3.745  | 1.00 | 0.00 | N |
| ATOM | 55 | C5  | DC | A | 3 | -2.517 | -0.830 | 2.402  | 1.00 | 0.00 | C |
| ATOM | 56 | C6  | DC | A | 3 | -3.384 | -0.829 | 1.364  | 1.00 | 0.00 | C |
| END  |    |     |    |   |   |        |        |        |      |      |   |

| COMPND | AAC / | M06-2X / | NA | MODEL / | NEUTRAL |        |        |        |      |      |   |
|--------|-------|----------|----|---------|---------|--------|--------|--------|------|------|---|
| ATOM   | 1     | O5'      | DA | A       | 1       | 6.648  | 2.170  | -1.018 | 1.00 | 0.00 | O |
| ATOM   | 2     | C5'      | DA | A       | 1       | 5.907  | 2.540  | -2.164 | 1.00 | 0.00 | C |
| ATOM   | 3     | C4'      | DA | A       | 1       | 4.447  | 2.223  | -1.912 | 1.00 | 0.00 | C |
| ATOM   | 4     | O4'      | DA | A       | 1       | 4.271  | 0.803  | -1.857 | 1.00 | 0.00 | O |
| ATOM   | 5     | C3'      | DA | A       | 1       | 3.929  | 2.765  | -0.572 | 1.00 | 0.00 | C |
| ATOM   | 6     | O3'      | DA | A       | 1       | 2.561  | 3.139  | -0.762 | 1.00 | 0.00 | O |
| ATOM   | 7     | C2'      | DA | A       | 1       | 4.019  | 1.547  | 0.339  | 1.00 | 0.00 | C |
| ATOM   | 8     | C1'      | DA | A       | 1       | 3.634  | 0.449  | -0.642 | 1.00 | 0.00 | C |
| ATOM   | 9     | N9       | DA | A       | 1       | 4.078  | -0.874 | -0.252 | 1.00 | 0.00 | N |
| ATOM   | 10    | C8       | DA | A       | 1       | 4.741  | -1.260 | 0.889  | 1.00 | 0.00 | C |
| ATOM   | 11    | N7       | DA | A       | 1       | 4.926  | -2.551 | 0.984  | 1.00 | 0.00 | N |
| ATOM   | 12    | C5       | DA | A       | 1       | 4.349  | -3.053 | -0.166 | 1.00 | 0.00 | C |
| ATOM   | 13    | C6       | DA | A       | 1       | 4.142  | -4.364 | -0.634 | 1.00 | 0.00 | C |
| ATOM   | 14    | N6       | DA | A       | 1       | 4.507  | -5.447 | 0.096  | 1.00 | 0.00 | N |
| ATOM   | 15    | N1       | DA | A       | 1       | 3.509  | -4.540 | -1.800 | 1.00 | 0.00 | N |
| ATOM   | 16    | C2       | DA | A       | 1       | 3.040  | -3.457 | -2.438 | 1.00 | 0.00 | C |
| ATOM   | 17    | N3       | DA | A       | 1       | 3.125  | -2.177 | -2.085 | 1.00 | 0.00 | N |
| ATOM   | 18    | C4       | DA | A       | 1       | 3.802  | -2.033 | -0.939 | 1.00 | 0.00 | C |
| ATOM   | 19    | P        | DA | A       | 2       | 1.852  | 4.040  | 0.390  | 1.00 | 0.00 | P |
| ATOM   | 20    | OP1      | DA | A       | 2       | 2.619  | 5.321  | 0.597  | 1.00 | 0.00 | O |
| ATOM   | 21    | OP2      | DA | A       | 2       | 1.618  | 3.255  | 1.662  | 1.00 | 0.00 | O |
| ATOM   | 22    | O5'      | DA | A       | 2       | 0.431  | 4.335  | -0.324 | 1.00 | 0.00 | O |
| ATOM   | 23    | C5'      | DA | A       | 2       | 0.016  | 3.886  | -1.613 | 1.00 | 0.00 | C |
| ATOM   | 24    | C4'      | DA | A       | 2       | -0.848 | 2.646  | -1.504 | 1.00 | 0.00 | C |
| ATOM   | 25    | O4'      | DA | A       | 2       | -0.032 | 1.517  | -1.176 | 1.00 | 0.00 | O |
| ATOM   | 26    | C3'      | DA | A       | 2       | -1.922 | 2.732  | -0.399 | 1.00 | 0.00 | C |
| ATOM   | 27    | O3'      | DA | A       | 2       | -3.096 | 2.099  | -0.919 | 1.00 | 0.00 | O |
| ATOM   | 28    | C2'      | DA | A       | 2       | -1.326 | 1.875  | 0.709  | 1.00 | 0.00 | C |
| ATOM   | 29    | C1'      | DA | A       | 2       | -0.689 | 0.790  | -0.145 | 1.00 | 0.00 | C |
| ATOM   | 30    | N9       | DA | A       | 2       | 0.247  | -0.071 | 0.526  | 1.00 | 0.00 | N |
| ATOM   | 31    | C8       | DA | A       | 2       | 1.051  | 0.206  | 1.612  | 1.00 | 0.00 | C |
| ATOM   | 32    | N7       | DA | A       | 2       | 1.706  | -0.839 | 2.055  | 1.00 | 0.00 | N |
| ATOM   | 33    | C5       | DA | A       | 2       | 1.309  | -1.867 | 1.219  | 1.00 | 0.00 | C |
| ATOM   | 34    | C6       | DA | A       | 2       | 1.576  | -3.250 | 1.199  | 1.00 | 0.00 | C |
| ATOM   | 35    | N6       | DA | A       | 2       | 2.328  | -3.858 | 2.158  | 1.00 | 0.00 | N |
| ATOM   | 36    | N1       | DA | A       | 2       | 1.025  | -4.000 | 0.238  | 1.00 | 0.00 | N |
| ATOM   | 37    | C2       | DA | A       | 2       | 0.196  | -3.413 | -0.637 | 1.00 | 0.00 | C |
| ATOM   | 38    | N3       | DA | A       | 2       | -0.182 | -2.139 | -0.695 | 1.00 | 0.00 | N |
| ATOM   | 39    | C4       | DA | A       | 2       | 0.410  | -1.412 | 0.259  | 1.00 | 0.00 | C |
| ATOM   | 40    | P        | DC | A       | 3       | -4.520 | 2.219  | -0.131 | 1.00 | 0.00 | P |
| ATOM   | 41    | OP1      | DC | A       | 3       | -5.258 | 3.453  | -0.581 | 1.00 | 0.00 | O |
| ATOM   | 42    | OP2      | DC | A       | 3       | -4.349 | 2.066  | 1.358  | 1.00 | 0.00 | O |
| ATOM   | 43    | O5'      | DC | A       | 3       | -5.215 | 0.857  | -0.673 | 1.00 | 0.00 | O |
| ATOM   | 44    | C5'      | DC | A       | 3       | -5.155 | 0.490  | -2.051 | 1.00 | 0.00 | C |
| ATOM   | 45    | C4'      | DC | A       | 3       | -5.119 | -1.022 | -2.128 | 1.00 | 0.00 | C |
| ATOM   | 46    | O4'      | DC | A       | 3       | -3.938 | -1.489 | -1.470 | 1.00 | 0.00 | O |
| ATOM   | 47    | C3'      | DC | A       | 3       | -6.307 | -1.723 | -1.447 | 1.00 | 0.00 | C |
| ATOM   | 48    | O3'      | DC | A       | 3       | -6.615 | -2.854 | -2.247 | 1.00 | 0.00 | O |
| ATOM   | 49    | C2'      | DC | A       | 3       | -5.724 | -2.134 | -0.101 | 1.00 | 0.00 | C |
| ATOM   | 50    | C1'      | DC | A       | 3       | -4.285 | -2.458 | -0.490 | 1.00 | 0.00 | C |
| ATOM   | 51    | N1       | DC | A       | 3       | -3.330 | -2.389 | 0.606  | 1.00 | 0.00 | N |
| ATOM   | 52    | C2       | DC | A       | 3       | -2.548 | -3.532 | 0.912  | 1.00 | 0.00 | C |
| ATOM   | 53    | O2       | DC | A       | 3       | -2.686 | -4.555 | 0.247  | 1.00 | 0.00 | O |
| ATOM   | 54    | N3       | DC | A       | 3       | -1.673 | -3.443 | 1.954  | 1.00 | 0.00 | N |
| ATOM   | 55    | C4       | DC | A       | 3       | -1.545 | -2.315 | 2.627  | 1.00 | 0.00 | C |
| ATOM   | 56    | N4       | DC | A       | 3       | -0.670 | -2.298 | 3.659  | 1.00 | 0.00 | N |
| ATOM   | 57    | C5       | DC | A       | 3       | -2.306 | -1.134 | 2.328  | 1.00 | 0.00 | C |
| ATOM   | 58    | C6       | DC | A       | 3       | -3.179 | -1.225 | 1.296  | 1.00 | 0.00 | C |
| END    |       |          |    |         |         |        |        |        |      |      |   |

| COMPND | AAC / | M06-2X / | NA | MODEL / | SINGLY IONIZED |        |        |        |      |      |   |
|--------|-------|----------|----|---------|----------------|--------|--------|--------|------|------|---|
| ATOM   | 1     | O5'      | DA | A       | 1              | 6.511  | 2.148  | -0.495 | 1.00 | 0.00 | O |
| ATOM   | 2     | C5'      | DA | A       | 1              | 5.955  | 2.736  | -1.656 | 1.00 | 0.00 | C |
| ATOM   | 3     | C4'      | DA | A       | 1              | 4.456  | 2.512  | -1.643 | 1.00 | 0.00 | C |
| ATOM   | 4     | O4'      | DA | A       | 1              | 4.173  | 1.114  | -1.785 | 1.00 | 0.00 | O |
| ATOM   | 5     | C3'      | DA | A       | 1              | 3.772  | 2.938  | -0.338 | 1.00 | 0.00 | C |
| ATOM   | 6     | O3'      | DA | A       | 1              | 2.439  | 3.329  | -0.681 | 1.00 | 0.00 | O |
| ATOM   | 7     | C2'      | DA | A       | 1              | 3.752  | 1.641  | 0.460  | 1.00 | 0.00 | C |
| ATOM   | 8     | C1'      | DA | A       | 1              | 3.456  | 0.647  | -0.655 | 1.00 | 0.00 | C |
| ATOM   | 9     | N9       | DA | A       | 1              | 3.872  | -0.714 | -0.370 | 1.00 | 0.00 | N |
| ATOM   | 10    | C8       | DA | A       | 1              | 4.723  | -1.186 | 0.601  | 1.00 | 0.00 | C |
| ATOM   | 11    | N7       | DA | A       | 1              | 4.953  | -2.476 | 0.521  | 1.00 | 0.00 | N |
| ATOM   | 12    | C5       | DA | A       | 1              | 4.227  | -2.875 | -0.577 | 1.00 | 0.00 | C |
| ATOM   | 13    | C6       | DA | A       | 1              | 4.035  | -4.135 | -1.190 | 1.00 | 0.00 | C |
| ATOM   | 14    | N6       | DA | A       | 1              | 4.587  | -5.252 | -0.695 | 1.00 | 0.00 | N |
| ATOM   | 15    | N1       | DA | A       | 1              | 3.256  | -4.203 | -2.280 | 1.00 | 0.00 | N |
| ATOM   | 16    | C2       | DA | A       | 1              | 2.663  | -3.082 | -2.713 | 1.00 | 0.00 | C |
| ATOM   | 17    | N3       | DA | A       | 1              | 2.738  | -1.847 | -2.214 | 1.00 | 0.00 | N |
| ATOM   | 18    | C4       | DA | A       | 1              | 3.542  | -1.804 | -1.146 | 1.00 | 0.00 | C |
| ATOM   | 19    | P        | DA | A       | 2              | 1.522  | 4.064  | 0.441  | 1.00 | 0.00 | P |
| ATOM   | 20    | OP1      | DA | A       | 2              | 2.119  | 5.389  | 0.838  | 1.00 | 0.00 | O |
| ATOM   | 21    | OP2      | DA | A       | 2              | 1.238  | 3.150  | 1.615  | 1.00 | 0.00 | O |
| ATOM   | 22    | O5'      | DA | A       | 2              | 0.176  | 4.296  | -0.423 | 1.00 | 0.00 | O |
| ATOM   | 23    | C5'      | DA | A       | 2              | -0.095 | 3.769  | -1.721 | 1.00 | 0.00 | C |
| ATOM   | 24    | C4'      | DA | A       | 2              | -0.902 | 2.489  | -1.648 | 1.00 | 0.00 | C |
| ATOM   | 25    | O4'      | DA | A       | 2              | -0.069 | 1.408  | -1.199 | 1.00 | 0.00 | O |
| ATOM   | 26    | C3'      | DA | A       | 2              | -2.085 | 2.548  | -0.658 | 1.00 | 0.00 | C |
| ATOM   | 27    | O3'      | DA | A       | 2              | -3.162 | 1.845  | -1.277 | 1.00 | 0.00 | O |
| ATOM   | 28    | C2'      | DA | A       | 2              | -1.560 | 1.758  | 0.536  | 1.00 | 0.00 | C |
| ATOM   | 29    | C1'      | DA | A       | 2              | -0.806 | 0.682  | -0.230 | 1.00 | 0.00 | C |
| ATOM   | 30    | N9       | DA | A       | 2              | 0.120  | -0.125 | 0.544  | 1.00 | 0.00 | N |
| ATOM   | 31    | C8       | DA | A       | 2              | 0.845  | 0.217  | 1.636  | 1.00 | 0.00 | C |
| ATOM   | 32    | N7       | DA | A       | 2              | 1.608  | -0.781 | 2.114  | 1.00 | 0.00 | N |
| ATOM   | 33    | C5       | DA | A       | 2              | 1.351  | -1.806 | 1.293  | 1.00 | 0.00 | C |
| ATOM   | 34    | C6       | DA | A       | 2              | 1.774  | -3.176 | 1.279  | 1.00 | 0.00 | C |
| ATOM   | 35    | N6       | DA | A       | 2              | 2.592  | -3.656 | 2.188  | 1.00 | 0.00 | N |
| ATOM   | 36    | N1       | DA | A       | 2              | 1.316  | -3.987 | 0.294  | 1.00 | 0.00 | N |
| ATOM   | 37    | C2       | DA | A       | 2              | 0.481  | -3.492 | -0.593 | 1.00 | 0.00 | C |
| ATOM   | 38    | N3       | DA | A       | 2              | -0.026 | -2.218 | -0.678 | 1.00 | 0.00 | N |
| ATOM   | 39    | C4       | DA | A       | 2              | 0.426  | -1.448 | 0.271  | 1.00 | 0.00 | C |
| ATOM   | 40    | P        | DC | A       | 3              | -4.652 | 1.865  | -0.622 | 1.00 | 0.00 | P |

|      |    |     |    |   |   |        |        |        |      |      |   |
|------|----|-----|----|---|---|--------|--------|--------|------|------|---|
| ATOM | 41 | OP1 | DC | A | 3 | -5.230 | 3.256  | -0.653 | 1.00 | 0.00 | O |
| ATOM | 42 | OP2 | DC | A | 3 | -4.679 | 1.223  | 0.748  | 1.00 | 0.00 | O |
| ATOM | 43 | O5' | DC | A | 3 | -5.411 | 0.953  | -1.720 | 1.00 | 0.00 | O |
| ATOM | 44 | C5' | DC | A | 3 | -4.775 | 0.042  | -2.616 | 1.00 | 0.00 | C |
| ATOM | 45 | C4' | DC | A | 3 | -4.550 | -1.324 | -2.010 | 1.00 | 0.00 | C |
| ATOM | 46 | O4' | DC | A | 3 | -3.500 | -1.282 | -1.042 | 1.00 | 0.00 | O |
| ATOM | 47 | C3' | DC | A | 3 | -5.785 | -1.932 | -1.299 | 1.00 | 0.00 | C |
| ATOM | 48 | O3' | DC | A | 3 | -6.047 | -3.173 | -1.934 | 1.00 | 0.00 | O |
| ATOM | 49 | C2' | DC | A | 3 | -5.297 | -2.110 | 0.140  | 1.00 | 0.00 | C |
| ATOM | 50 | C1' | DC | A | 3 | -3.807 | -2.311 | -0.109 | 1.00 | 0.00 | C |
| ATOM | 51 | N1' | DC | A | 3 | -2.928 | -2.205 | 1.040  | 1.00 | 0.00 | N |
| ATOM | 52 | C2  | DC | A | 3 | -1.997 | -3.243 | 1.289  | 1.00 | 0.00 | C |
| ATOM | 53 | O2  | DC | A | 3 | -1.944 | -4.206 | 0.527  | 1.00 | 0.00 | O |
| ATOM | 54 | N3  | DC | A | 3 | -1.168 | -3.115 | 2.363  | 1.00 | 0.00 | N |
| ATOM | 55 | C4  | DC | A | 3 | -1.267 | -2.058 | 3.166  | 1.00 | 0.00 | C |
| ATOM | 56 | N4  | DC | A | 3 | -0.447 | -2.013 | 4.223  | 1.00 | 0.00 | N |
| ATOM | 57 | C5  | DC | A | 3 | -2.182 | -0.983 | 2.923  | 1.00 | 0.00 | C |
| ATOM | 58 | C6  | DC | A | 3 | -2.992 | -1.107 | 1.842  | 1.00 | 0.00 | C |
| END  |    |     |    |   |   |        |        |        |      |      |   |

| COMPND | CCA / M06-2X / | NA  | MODEL / | NEUTRAL |   |        |        |        |      |      |   |
|--------|----------------|-----|---------|---------|---|--------|--------|--------|------|------|---|
| ATOM   | 1              | O5' | DC      | A       | 1 | -7.314 | -0.919 | -0.443 | 1.00 | 0.00 | O |
| ATOM   | 2              | C5' | DC      | A       | 1 | -6.920 | -1.858 | -1.430 | 1.00 | 0.00 | C |
| ATOM   | 3              | C4' | DC      | A       | 1 | -5.405 | -1.906 | -1.487 | 1.00 | 0.00 | C |
| ATOM   | 4              | O4' | DC      | A       | 1 | -4.898 | -0.663 | -1.975 | 1.00 | 0.00 | O |
| ATOM   | 5              | C3' | DC      | A       | 1 | -4.730 | -2.120 | -0.125 | 1.00 | 0.00 | C |
| ATOM   | 6              | O3' | DC      | A       | 1 | -3.492 | -2.794 | -0.388 | 1.00 | 0.00 | O |
| ATOM   | 7              | C2' | DC      | A       | 1 | -4.461 | -0.695 | 0.332  | 1.00 | 0.00 | C |
| ATOM   | 8              | C1' | DC      | A       | 1 | -4.071 | -0.044 | -0.993 | 1.00 | 0.00 | C |
| ATOM   | 9              | N1  | DC      | A       | 1 | -4.276 | 1.392  | -1.040 | 1.00 | 0.00 | N |
| ATOM   | 10             | C2  | DC      | A       | 1 | -3.224 | 2.227  | -1.496 | 1.00 | 0.00 | C |
| ATOM   | 11             | O2  | DC      | A       | 1 | -2.210 | 1.715  | -1.960 | 1.00 | 0.00 | O |
| ATOM   | 12             | N3  | DC      | A       | 1 | -3.397 | 3.574  | -1.382 | 1.00 | 0.00 | N |
| ATOM   | 13             | C4  | DC      | A       | 1 | -4.552 | 4.065  | -0.965 | 1.00 | 0.00 | C |
| ATOM   | 14             | N4  | DC      | A       | 1 | -4.644 | 5.399  | -0.817 | 1.00 | 0.00 | N |
| ATOM   | 15             | C5  | DC      | A       | 1 | -5.692 | 3.245  | -0.664 | 1.00 | 0.00 | C |
| ATOM   | 16             | C6  | DC      | A       | 1 | -5.494 | 1.908  | -0.714 | 1.00 | 0.00 | C |
| ATOM   | 17             | P   | DC      | A       | 2 | -2.622 | -3.369 | 0.860  | 1.00 | 0.00 | P |
| ATOM   | 18             | OP1 | DC      | A       | 2 | -3.337 | -4.512 | 1.534  | 1.00 | 0.00 | O |
| ATOM   | 19             | OP2 | DC      | A       | 2 | -2.210 | -2.266 | 1.811  | 1.00 | 0.00 | O |
| ATOM   | 20             | O5' | DC      | A       | 2 | -1.351 | -3.950 | 0.048  | 1.00 | 0.00 | O |
| ATOM   | 21             | C5' | DC      | A       | 2 | -0.948 | -3.598 | -1.276 | 1.00 | 0.00 | C |
| ATOM   | 22             | C4' | DC      | A       | 2 | 0.111  | -2.515 | -1.298 | 1.00 | 0.00 | C |
| ATOM   | 23             | O4' | DC      | A       | 2 | -0.485 | -1.233 | -1.092 | 1.00 | 0.00 | O |
| ATOM   | 24             | C3' | DC      | A       | 2 | 1.200  | -2.668 | -0.209 | 1.00 | 0.00 | C |
| ATOM   | 25             | O3' | DC      | A       | 2 | 2.462  | -2.456 | -0.859 | 1.00 | 0.00 | O |
| ATOM   | 26             | C2' | DC      | A       | 2 | 0.884  | -1.515 | 0.736  | 1.00 | 0.00 | C |
| ATOM   | 27             | C1' | DC      | A       | 2 | 0.436  | -0.485 | -0.293 | 1.00 | 0.00 | C |
| ATOM   | 28             | N1  | DC      | A       | 2 | -0.208 | 0.717  | 0.181  | 1.00 | 0.00 | N |
| ATOM   | 29             | C2  | DC      | A       | 2 | 0.232  | 1.971  | -0.318 | 1.00 | 0.00 | C |
| ATOM   | 30             | O2  | DC      | A       | 2 | 1.160  | 2.012  | -1.119 | 1.00 | 0.00 | O |
| ATOM   | 31             | N3  | DC      | A       | 2 | -0.387 | 3.093  | 0.151  | 1.00 | 0.00 | N |
| ATOM   | 32             | C4  | DC      | A       | 2 | -1.402 | 2.994  | 0.984  | 1.00 | 0.00 | C |
| ATOM   | 33             | N4  | DC      | A       | 2 | -1.939 | 4.150  | 1.458  | 1.00 | 0.00 | N |
| ATOM   | 34             | C5  | DC      | A       | 2 | -1.911 | 1.740  | 1.457  | 1.00 | 0.00 | C |
| ATOM   | 35             | C6  | DC      | A       | 2 | -1.269 | 0.626  | 1.023  | 1.00 | 0.00 | C |
| ATOM   | 36             | P   | DA      | A       | 3 | 3.848  | -2.871 | -0.107 | 1.00 | 0.00 | P |
| ATOM   | 37             | OP1 | DA      | A       | 3 | 4.350  | -4.189 | -0.636 | 1.00 | 0.00 | O |
| ATOM   | 38             | OP2 | DA      | A       | 3 | 3.712  | -2.756 | 1.387  | 1.00 | 0.00 | O |
| ATOM   | 39             | O5' | DA      | A       | 3 | 4.794  | -1.644 | -0.601 | 1.00 | 0.00 | O |
| ATOM   | 40             | C5' | DA      | A       | 3 | 4.959  | -1.405 | -1.999 | 1.00 | 0.00 | C |
| ATOM   | 41             | C4' | DA      | A       | 3 | 5.519  | -0.010 | -2.187 | 1.00 | 0.00 | C |
| ATOM   | 42             | O4' | DA      | A       | 3 | 4.565  | 0.953  | -1.729 | 1.00 | 0.00 | O |
| ATOM   | 43             | C3' | DA      | A       | 3 | 6.813  | 0.278  | -1.419 | 1.00 | 0.00 | C |
| ATOM   | 44             | O3' | DA      | A       | 3 | 7.539  | 1.210  | -2.203 | 1.00 | 0.00 | O |
| ATOM   | 45             | C2' | DA      | A       | 3 | 6.299  | 0.915  | -0.134 | 1.00 | 0.00 | C |
| ATOM   | 46             | C1' | DA      | A       | 3 | 5.077  | 1.689  | -0.632 | 1.00 | 0.00 | C |
| ATOM   | 47             | N9  | DA      | A       | 3 | 4.043  | 1.839  | 0.370  | 1.00 | 0.00 | N |
| ATOM   | 48             | C8  | DA      | A       | 3 | 3.407  | 0.830  | 1.053  | 1.00 | 0.00 | C |
| ATOM   | 49             | N7  | DA      | A       | 3 | 2.479  | 1.253  | 1.875  | 1.00 | 0.00 | N |
| ATOM   | 50             | C5  | DA      | A       | 3 | 2.498  | 2.624  | 1.718  | 1.00 | 0.00 | C |
| ATOM   | 51             | C6  | DA      | A       | 3 | 1.715  | 3.654  | 2.269  | 1.00 | 0.00 | C |
| ATOM   | 52             | N6  | DA      | A       | 3 | 0.757  | 3.408  | 3.201  | 1.00 | 0.00 | N |
| ATOM   | 53             | N1  | DA      | A       | 3 | 1.949  | 4.917  | 1.886  | 1.00 | 0.00 | N |
| ATOM   | 54             | C2  | DA      | A       | 3 | 2.911  | 5.137  | 0.977  | 1.00 | 0.00 | C |
| ATOM   | 55             | N3  | DA      | A       | 3 | 3.704  | 4.258  | 0.370  | 1.00 | 0.00 | N |
| ATOM   | 56             | C4  | DA      | A       | 3 | 3.448  | 3.009  | 0.775  | 1.00 | 0.00 | C |
| END    |                |     |         |         |   |        |        |        |      |      |   |

| COMPND | CCA / M06-2X / | NA  | MODEL / | SINGLY IONIZED |   |        |        |        |      |      |   |
|--------|----------------|-----|---------|----------------|---|--------|--------|--------|------|------|---|
| ATOM   | 1              | O5' | DC      | A              | 1 | -7.306 | -0.737 | -0.602 | 1.00 | 0.00 | O |
| ATOM   | 2              | C5' | DC      | A              | 1 | -6.900 | -1.695 | -1.565 | 1.00 | 0.00 | C |
| ATOM   | 3              | C4' | DC      | A              | 1 | -5.387 | -1.790 | -1.557 | 1.00 | 0.00 | C |
| ATOM   | 4              | O4' | DC      | A              | 1 | -4.823 | -0.565 | -2.034 | 1.00 | 0.00 | O |
| ATOM   | 5              | C3' | DC      | A              | 1 | -4.779 | -2.012 | -0.166 | 1.00 | 0.00 | C |
| ATOM   | 6              | O3' | DC      | A              | 1 | -3.556 | -2.734 | -0.365 | 1.00 | 0.00 | O |
| ATOM   | 7              | C2' | DC      | A              | 1 | -4.479 | -0.592 | 0.288  | 1.00 | 0.00 | C |
| ATOM   | 8              | C1' | DC      | A              | 1 | -4.014 | 0.033  | -1.026 | 1.00 | 0.00 | C |
| ATOM   | 9              | N1  | DC      | A              | 1 | -4.172 | 1.476  | -1.090 | 1.00 | 0.00 | N |
| ATOM   | 10             | C2  | DC      | A              | 1 | -3.073 | 2.284  | -1.480 | 1.00 | 0.00 | C |
| ATOM   | 11             | O2  | DC      | A              | 1 | -2.045 | 1.749  | -1.885 | 1.00 | 0.00 | O |
| ATOM   | 12             | N3  | DC      | A              | 1 | -3.217 | 3.635  | -1.371 | 1.00 | 0.00 | N |
| ATOM   | 13             | C4  | DC      | A              | 1 | -4.386 | 4.157  | -1.036 | 1.00 | 0.00 | C |
| ATOM   | 14             | N4  | DC      | A              | 1 | -4.456 | 5.492  | -0.908 | 1.00 | 0.00 | N |
| ATOM   | 15             | C5  | DC      | A              | 1 | -5.565 | 3.365  | -0.814 | 1.00 | 0.00 | C |
| ATOM   | 16             | C6  | DC      | A              | 1 | -5.396 | 2.024  | -0.847 | 1.00 | 0.00 | C |
| ATOM   | 17             | P   | DC      | A              | 2 | -2.769 | -3.334 | 0.925  | 1.00 | 0.00 | P |
| ATOM   | 18             | OP1 | DC      | A              | 2 | -3.588 | -4.401 | 1.606  | 1.00 | 0.00 | O |
| ATOM   | 19             | OP2 | DC      | A              | 2 | -2.303 | -2.237 | 1.860  | 1.00 | 0.00 | O |
| ATOM   | 20             | O5' | DC      | A              | 2 | -1.515 | -4.023 | 0.174  | 1.00 | 0.00 | O |
| ATOM   | 21             | C5' | DC      | A              | 2 | -1.081 | -3.764 | -1.159 | 1.00 | 0.00 | C |
| ATOM   | 22             | C4' | DC      | A              | 2 | 0.012  | -2.719 | -1.222 | 1.00 | 0.00 | C |
| ATOM   | 23             | O4' | DC      | A              | 2 | -0.541 | -1.412 | -1.043 | 1.00 | 0.00 | O |
| ATOM   | 24             | C3' | DC      | A              | 2 | 1.121  | -2.876 | -0.149 | 1.00 | 0.00 | C |
| ATOM   | 25             | O3' | DC      | A              | 2 | 2.366  | -2.803 | -0.859 | 1.00 | 0.00 | O |
| ATOM   | 26             | C2' | DC      | A              | 2 | 0.891  | -1.659 | 0.737  | 1.00 | 0.00 | C |
| ATOM   | 27             | C1' | DC      | A              | 2 | 0.431  | -0.664 | -0.319 | 1.00 | 0.00 | C |
| ATOM   | 28             | N1  | DC      | A              | 2 | -0.150 | 0.570  | 0.162  | 1.00 | 0.00 | N |
| ATOM   | 29             | C2  | DC      | A              | 2 | 0.434  | 1.797  | -0.225 | 1.00 | 0.00 | C |
| ATOM   | 30             | O2  | DC      | A              | 2 | 1.423  | 1.795  | -0.956 | 1.00 | 0.00 | O |
| ATOM   | 31             | N3  | DC      | A              | 2 | -0.078 | 2.944  | 0.303  | 1.00 | 0.00 | N |
| ATOM   | 32             | C4  | DC      | A              | 2 | -1.148 | 2.899  | 1.083  | 1.00 | 0.00 | C |
| ATOM   | 33             | N4  | DC      | A              | 2 | -1.564 | 4.065  | 1.620  | 1.00 | 0.00 | N |
| ATOM   | 34             | C5  | DC      | A              | 2 | -1.800 | 1.676  | 1.442  | 1.00 | 0.00 | C |
| ATOM   | 35             | C6  | DC      | A              | 2 | -1.243 | 0.533  | 0.969  | 1.00 | 0.00 | C |
| ATOM   | 36             | P   | DA      | A              | 3 | 3.816  | -2.876 | -0.123 | 1.00 | 0.00 | P |
| ATOM   | 37             | OP1 | DA      | A              | 3 | 4.570  | -4.080 | -0.616 | 1.00 | 0.00 | O |
| ATOM   | 38             | OP2 | DA      | A              | 3 | 3.709  | -2.699 | 1.367  | 1.00 | 0.00 | O |

|      |    |     |    |   |   |       |        |        |      |      |   |
|------|----|-----|----|---|---|-------|--------|--------|------|------|---|
| ATOM | 39 | O5' | DA | A | 3 | 4.493 | -1.504 | -0.693 | 1.00 | 0.00 | O |
| ATOM | 40 | C5' | DA | A | 3 | 4.608 | -1.313 | -2.100 | 1.00 | 0.00 | C |
| ATOM | 41 | C4' | DA | A | 3 | 5.227 | 0.048  | -2.344 | 1.00 | 0.00 | C |
| ATOM | 42 | O4' | DA | A | 3 | 4.369 | 1.065  | -1.810 | 1.00 | 0.00 | O |
| ATOM | 43 | C3' | DA | A | 3 | 6.592 | 0.275  | -1.689 | 1.00 | 0.00 | C |
| ATOM | 44 | O3' | DA | A | 3 | 7.275 | 1.196  | -2.521 | 1.00 | 0.00 | O |
| ATOM | 45 | C2' | DA | A | 3 | 6.222 | 0.908  | -0.351 | 1.00 | 0.00 | C |
| ATOM | 46 | C1' | DA | A | 3 | 4.977 | 1.716  | -0.724 | 1.00 | 0.00 | C |
| ATOM | 47 | N9  | DA | A | 3 | 4.015 | 1.817  | 0.381  | 1.00 | 0.00 | N |
| ATOM | 48 | C8  | DA | A | 3 | 3.489 | 0.813  | 1.110  | 1.00 | 0.00 | C |
| ATOM | 49 | N7  | DA | A | 3 | 2.566 | 1.209  | -2.010 | 1.00 | 0.00 | N |
| ATOM | 50 | C5  | DA | A | 3 | 2.489 | 2.525  | 1.826  | 1.00 | 0.00 | C |
| ATOM | 51 | C6  | DA | A | 3 | 1.701 | 3.553  | 2.445  | 1.00 | 0.00 | C |
| ATOM | 52 | N6  | DA | A | 3 | 0.876 | 3.291  | 3.431  | 1.00 | 0.00 | N |
| ATOM | 53 | N1  | DA | A | 3 | 1.831 | 4.831  | 2.003  | 1.00 | 0.00 | N |
| ATOM | 54 | C2  | DA | A | 3 | 2.678 | 5.068  | 1.029  | 1.00 | 0.00 | C |
| ATOM | 55 | N3  | DA | A | 3 | 3.502 | 4.190  | 0.366  | 1.00 | 0.00 | N |
| ATOM | 56 | C4  | DA | A | 3 | 3.364 | 2.968  | 0.785  | 1.00 | 0.00 | C |
| END  |    |     |    |   |   |       |        |        |      |      |   |

| COMPND | CAA | /   | M06-2X | / | NA | MODEL  | /      | NEUTRAL |      |      |   |  |
|--------|-----|-----|--------|---|----|--------|--------|---------|------|------|---|--|
| ATOM   | 1   | O5' | DC     | A | 1  | -7.276 | -0.856 | -0.308  | 1.00 | 0.00 | O |  |
| ATOM   | 2   | C5' | DC     | A | 1  | -6.931 | -1.817 | -1.290  | 1.00 | 0.00 | C |  |
| ATOM   | 3   | C4' | DC     | A | 1  | -5.419 | -1.909 | -1.379  | 1.00 | 0.00 | C |  |
| ATOM   | 4   | O4' | DC     | A | 1  | -4.891 | -0.684 | -1.892  | 1.00 | 0.00 | O |  |
| ATOM   | 5   | C3' | DC     | A | 1  | -4.725 | -2.124 | -0.028  | 1.00 | 0.00 | C |  |
| ATOM   | 6   | O3' | DC     | A | 1  | -3.510 | -2.838 | -0.296  | 1.00 | 0.00 | O |  |
| ATOM   | 7   | C2' | DC     | A | 1  | -4.408 | -0.702 | 0.407   | 1.00 | 0.00 | C |  |
| ATOM   | 8   | C1' | DC     | A | 1  | -4.031 | -0.076 | -0.933  | 1.00 | 0.00 | C |  |
| ATOM   | 9   | N1  | DC     | A | 1  | -4.193 | 1.366  | -0.993  | 1.00 | 0.00 | N |  |
| ATOM   | 10  | C2  | DC     | A | 1  | -3.164 | 2.150  | -1.576  | 1.00 | 0.00 | C |  |
| ATOM   | 11  | O2  | DC     | A | 1  | -2.228 | 1.592  | -2.139  | 1.00 | 0.00 | O |  |
| ATOM   | 12  | N3  | DC     | A | 1  | -3.267 | 3.505  | -1.465  | 1.00 | 0.00 | N |  |
| ATOM   | 13  | C4  | DC     | A | 1  | -4.362 | 4.049  | -0.963  | 1.00 | 0.00 | C |  |
| ATOM   | 14  | N4  | DC     | A | 1  | -4.386 | 5.388  | -0.826  | 1.00 | 0.00 | N |  |
| ATOM   | 15  | C5  | DC     | A | 1  | -5.507 | 3.281  | -0.557  | 1.00 | 0.00 | C |  |
| ATOM   | 16  | C6  | DC     | A | 1  | -5.362 | 1.937  | -0.588  | 1.00 | 0.00 | C |  |
| ATOM   | 17  | P   | DA     | A | 2  | -2.703 | -3.486 | 0.957   | 1.00 | 0.00 | P |  |
| ATOM   | 18  | OP1 | DA     | A | 2  | -3.507 | -4.590 | 1.597   | 1.00 | 0.00 | O |  |
| ATOM   | 19  | OP2 | DA     | A | 2  | -2.242 | -2.427 | 1.935   | 1.00 | 0.00 | O |  |
| ATOM   | 20  | O5' | DA     | A | 2  | -1.431 | -4.107 | 0.179   | 1.00 | 0.00 | O |  |
| ATOM   | 21  | C5' | DA     | A | 2  | -1.086 | -3.951 | -1.196  | 1.00 | 0.00 | C |  |
| ATOM   | 22  | C4' | DA     | A | 2  | 0.058  | -2.973 | -1.373  | 1.00 | 0.00 | C |  |
| ATOM   | 23  | O4' | DA     | A | 2  | -0.421 | -1.627 | -1.267  | 1.00 | 0.00 | O |  |
| ATOM   | 24  | C3' | DA     | A | 2  | 1.171  | -3.120 | -0.311  | 1.00 | 0.00 | C |  |
| ATOM   | 25  | O3' | DA     | A | 2  | 2.414  | -2.999 | -1.014  | 1.00 | 0.00 | O |  |
| ATOM   | 26  | C2' | DA     | A | 2  | 0.907  | -1.927 | 0.598   | 1.00 | 0.00 | C |  |
| ATOM   | 27  | C1' | DA     | A | 2  | 0.480  | -0.899 | -0.439  | 1.00 | 0.00 | C |  |
| ATOM   | 28  | N9  | DA     | A | 2  | -0.177 | 0.275  | 0.065   | 1.00 | 0.00 | N |  |
| ATOM   | 29  | C8  | DA     | A | 2  | -1.150 | 0.340  | 1.032   | 1.00 | 0.00 | C |  |
| ATOM   | 30  | N7  | DA     | A | 2  | -1.534 | 1.565  | 1.307   | 1.00 | 0.00 | N |  |
| ATOM   | 31  | C5  | DA     | A | 2  | -0.755 | 2.352  | 0.478   | 1.00 | 0.00 | C |  |
| ATOM   | 32  | C6  | DA     | A | 2  | -0.663 | 3.741  | 0.292   | 1.00 | 0.00 | C |  |
| ATOM   | 33  | N6  | DA     | A | 2  | -1.414 | 4.617  | 1.014   | 1.00 | 0.00 | N |  |
| ATOM   | 34  | N1  | DA     | A | 2  | 0.244  | 4.217  | -0.574  | 1.00 | 0.00 | N |  |
| ATOM   | 35  | C2  | DA     | A | 2  | 1.014  | 3.340  | -1.235  | 1.00 | 0.00 | C |  |
| ATOM   | 36  | N3  | DA     | A | 2  | 1.007  | 2.011  | -1.170  | 1.00 | 0.00 | N |  |
| ATOM   | 37  | C4  | DA     | A | 2  | 0.096  | 1.571  | -0.298  | 1.00 | 0.00 | C |  |
| ATOM   | 38  | P   | DA     | A | 3  | 3.848  | -3.102 | -0.242  | 1.00 | 0.00 | P |  |
| ATOM   | 39  | OP1 | DA     | A | 3  | 4.667  | -4.193 | -0.876  | 1.00 | 0.00 | O |  |
| ATOM   | 40  | OP2 | DA     | A | 3  | 3.669  | -3.158 | 1.249   | 1.00 | 0.00 | O |  |
| ATOM   | 41  | O5' | DA     | A | 3  | 4.479  | -1.640 | -0.601  | 1.00 | 0.00 | O |  |
| ATOM   | 42  | C5' | DA     | A | 3  | 4.670  | -1.316 | -1.978  | 1.00 | 0.00 | C |  |
| ATOM   | 43  | C4' | DA     | A | 3  | 5.278  | 0.067  | -2.083  | 1.00 | 0.00 | C |  |
| ATOM   | 44  | O4' | DA     | A | 3  | 4.363  | 1.039  | -1.570  | 1.00 | 0.00 | O |  |
| ATOM   | 45  | C3' | DA     | A | 3  | 6.582  | 0.261  | -1.300  | 1.00 | 0.00 | C |  |
| ATOM   | 46  | O3' | DA     | A | 3  | 7.340  | 1.214  | -2.026  | 1.00 | 0.00 | O |  |
| ATOM   | 47  | C2' | DA     | A | 3  | 6.089  | 0.834  | 0.023   | 1.00 | 0.00 | C |  |
| ATOM   | 48  | C1' | DA     | A | 3  | 4.896  | 1.681  | -0.425  | 1.00 | 0.00 | C |  |
| ATOM   | 49  | N9  | DA     | A | 3  | 3.857  | 1.793  | 0.578   | 1.00 | 0.00 | N |  |
| ATOM   | 50  | C8  | DA     | A | 3  | 3.153  | 0.757  | 1.145   | 1.00 | 0.00 | C |  |
| ATOM   | 51  | N7  | DA     | A | 3  | 2.199  | 1.147  | 1.953   | 1.00 | 0.00 | N |  |
| ATOM   | 52  | C5  | DA     | A | 3  | 2.273  | 2.526  | 1.911   | 1.00 | 0.00 | C |  |
| ATOM   | 53  | C6  | DA     | A | 3  | 1.501  | 3.544  | 2.502   | 1.00 | 0.00 | C |  |
| ATOM   | 54  | N6  | DA     | A | 3  | 0.445  | 3.277  | 3.317   | 1.00 | 0.00 | N |  |
| ATOM   | 55  | N1  | DA     | A | 3  | 1.831  | 4.822  | 2.264   | 1.00 | 0.00 | N |  |
| ATOM   | 56  | C2  | DA     | A | 3  | 2.851  | 5.075  | 1.432   | 1.00 | 0.00 | C |  |
| ATOM   | 57  | N3  | DA     | A | 3  | 3.625  | 4.214  | 0.777   | 1.00 | 0.00 | N |  |
| ATOM   | 58  | C4  | DA     | A | 3  | 3.291  | 2.948  | 1.056   | 1.00 | 0.00 | C |  |
| END    |     |     |        |   |    |        |        |         |      |      |   |  |

| COMPND | CAA | /   | M06-2X | / | NA | MODEL  | /      | SINGLY IONIZED |      |      |   |  |
|--------|-----|-----|--------|---|----|--------|--------|----------------|------|------|---|--|
| ATOM   | 1   | O5' | DC     | A | 1  | -6.984 | -1.619 | -0.498         | 1.00 | 0.00 | O |  |
| ATOM   | 2   | C5' | DC     | A | 1  | -6.409 | -2.463 | -1.482         | 1.00 | 0.00 | C |  |
| ATOM   | 3   | C4' | DC     | A | 1  | -4.906 | -2.262 | -1.469         | 1.00 | 0.00 | C |  |
| ATOM   | 4   | O4' | DC     | A | 1  | -4.593 | -0.945 | -1.932         | 1.00 | 0.00 | O |  |
| ATOM   | 5   | C3' | DC     | A | 1  | -4.279 | -2.372 | -0.074         | 1.00 | 0.00 | C |  |
| ATOM   | 6   | O3' | DC     | A | 1  | -2.942 | -2.860 | -0.244         | 1.00 | 0.00 | O |  |
| ATOM   | 7   | C2' | DC     | A | 1  | -4.232 | -0.924 | 0.389          | 1.00 | 0.00 | C |  |
| ATOM   | 8   | C1' | DC     | A | 1  | -3.916 | -0.209 | -0.925         | 1.00 | 0.00 | C |  |
| ATOM   | 9   | N1  | DC     | A | 1  | -4.376 | 1.173  | -0.980         | 1.00 | 0.00 | N |  |
| ATOM   | 10  | C2  | DC     | A | 1  | -3.476 | 2.205  | -1.312         | 1.00 | 0.00 | C |  |
| ATOM   | 11  | O2  | DC     | A | 1  | -2.305 | 1.919  | -1.592         | 1.00 | 0.00 | O |  |
| ATOM   | 12  | N3  | DC     | A | 1  | -3.924 | 3.484  | -1.289         | 1.00 | 0.00 | N |  |
| ATOM   | 13  | C4  | DC     | A | 1  | -5.208 | 3.735  | -1.054         | 1.00 | 0.00 | C |  |
| ATOM   | 14  | N4  | DC     | A | 1  | -5.593 | 5.017  | -1.030         | 1.00 | 0.00 | N |  |
| ATOM   | 15  | C5  | DC     | A | 1  | -6.176 | 2.698  | -0.842         | 1.00 | 0.00 | C |  |
| ATOM   | 16  | C6  | DC     | A | 1  | -5.705 | 1.431  | -0.812         | 1.00 | 0.00 | C |  |
| ATOM   | 17  | P   | DA     | A | 2  | -2.271 | -3.653 | 1.007          | 1.00 | 0.00 | P |  |
| ATOM   | 18  | OP1 | DA     | A | 2  | -3.148 | -4.800 | 1.432          | 1.00 | 0.00 | O |  |
| ATOM   | 19  | OP2 | DA     | A | 2  | -1.902 | -2.705 | 2.129          | 1.00 | 0.00 | O |  |
| ATOM   | 20  | O5' | DA     | A | 2  | -0.903 | -4.159 | 0.317          | 1.00 | 0.00 | O |  |
| ATOM   | 21  | C5' | DA     | A | 2  | -0.593 | -4.167 | -1.075         | 1.00 | 0.00 | C |  |
| ATOM   | 22  | C4' | DA     | A | 2  | 0.519  | -3.173 | -1.352         | 1.00 | 0.00 | C |  |
| ATOM   | 23  | O4' | DA     | A | 2  | -0.003 | -1.835 | -1.306         | 1.00 | 0.00 | O |  |
| ATOM   | 24  | C3' | DA     | A | 2  | 1.660  | -3.220 | -0.316         | 1.00 | 0.00 | C |  |
| ATOM   | 25  | O3' | DA     | A | 2  | 2.868  | -3.022 | -1.054         | 1.00 | 0.00 | O |  |
| ATOM   | 26  | C2' | DA     | A | 2  | 1.319  | -2.043 | 0.592          | 1.00 | 0.00 | C |  |
| ATOM   | 27  | C1' | DA     | A | 2  | 0.797  | -1.057 | -0.440         | 1.00 | 0.00 | C |  |
| ATOM   | 28  | N9  | DA     | A | 2  | -0.015 | 0.017  | 0.106          | 1.00 | 0.00 | N |  |
| ATOM   | 29  | C8  | DA     | A | 2  | -0.916 | -0.049 | 1.117          | 1.00 | 0.00 | C |  |
| ATOM   | 30  | N7  | DA     | A | 2  | -1.466 | 1.135  | 1.433          | 1.00 | 0.00 | N |  |
| ATOM   | 31  | C5  | DA     | A | 2  | -0.882 | 1.993  | 0.595          | 1.00 | 0.00 | C |  |
| ATOM   | 32  | C6  | DA     | A | 2  | -1.036 | 3.401  | 0.375          | 1.00 | 0.00 | C |  |
| ATOM   | 33  | N6  | DA     | A | 2  | -1.895 | 4.106  | 1.073          | 1.00 | 0.00 | N |  |
| ATOM   | 34  | N1  | DA     | A | 2  | -0.273 | 4.004  | -0.569         | 1.00 | 0.00 | N |  |
| ATOM   | 35  | C2  | DA     | A | 2  | 0.556  | 3.257  | -1.267         | 1.00 | 0.00 | C |  |
| ATOM   | 36  | N3  | DA     | A | 2  | 0.775  | 1.907  | -1.191         | 1.00 | 0.00 | N |  |

|        |                    |                        |    |   |   |        |        |        |      |      |   |
|--------|--------------------|------------------------|----|---|---|--------|--------|--------|------|------|---|
| ATOM   | 37                 | C4                     | DA | A | 2 | 0.049  | 1.343  | -0.272 | 1.00 | 0.00 | C |
| ATOM   | 38                 | P                      | DA | A | 3 | 4.304  | -2.733 | -0.332 | 1.00 | 0.00 | P |
| ATOM   | 39                 | OP1                    | DA | A | 3 | 5.354  | -3.538 | -1.046 | 1.00 | 0.00 | O |
| ATOM   | 40                 | OP2                    | DA | A | 3 | 4.217  | -2.874 | 1.161  | 1.00 | 0.00 | O |
| ATOM   | 41                 | O5'                    | DA | A | 3 | 4.489  | -1.142 | -0.658 | 1.00 | 0.00 | O |
| ATOM   | 42                 | C5'                    | DA | A | 3 | 4.605  | -0.768 | -2.033 | 1.00 | 0.00 | C |
| ATOM   | 43                 | C4'                    | DA | A | 3 | 5.027  | 0.683  | -2.119 | 1.00 | 0.00 | C |
| ATOM   | 44                 | O4'                    | DA | A | 3 | 4.011  | 1.515  | -1.552 | 1.00 | 0.00 | O |
| ATOM   | 45                 | C3'                    | DA | A | 3 | 6.320  | 1.021  | -1.369 | 1.00 | 0.00 | C |
| ATOM   | 46                 | O3'                    | DA | A | 3 | 6.934  | 2.071  | -2.095 | 1.00 | 0.00 | O |
| ATOM   | 47                 | C2'                    | DA | A | 3 | 5.802  | 1.506  | -0.020 | 1.00 | 0.00 | C |
| ATOM   | 48                 | C1'                    | DA | A | 3 | 4.503  | 2.206  | -0.419 | 1.00 | 0.00 | C |
| ATOM   | 49                 | N9                     | DA | A | 3 | 3.490  | 2.182  | 0.620  | 1.00 | 0.00 | N |
| ATOM   | 50                 | C8                     | DA | A | 3 | 2.990  | 1.069  | 1.253  | 1.00 | 0.00 | C |
| ATOM   | 51                 | N7                     | DA | A | 3 | 2.015  | 1.331  | 2.088  | 1.00 | 0.00 | N |
| ATOM   | 52                 | C5                     | DA | A | 3 | 1.860  | 2.703  | 1.996  | 1.00 | 0.00 | C |
| ATOM   | 53                 | C6                     | DA | A | 3 | 0.988  | 3.617  | 2.625  | 1.00 | 0.00 | C |
| ATOM   | 54                 | N6                     | DA | A | 3 | 0.028  | 3.221  | 3.485  | 1.00 | 0.00 | N |
| ATOM   | 55                 | N1                     | DA | A | 3 | 1.077  | 4.917  | 2.301  | 1.00 | 0.00 | N |
| ATOM   | 56                 | C2                     | DA | A | 3 | 1.992  | 5.291  | 1.396  | 1.00 | 0.00 | C |
| ATOM   | 57                 | N3                     | DA | A | 3 | 2.870  | 4.538  | 0.738  | 1.00 | 0.00 | N |
| ATOM   | 58                 | C4                     | DA | A | 3 | 2.761  | 3.249  | 1.081  | 1.00 | 0.00 | C |
| END    |                    |                        |    |   |   |        |        |        |      |      |   |
| COMPND | ACC / M06-2X / PO- | MODEL / NEUTRAL        |    |   |   |        |        |        |      |      |   |
| ATOM   | 1                  | O5'                    | DA | A | 1 | -7.345 | -0.356 | 0.238  | 1.00 | 0.00 | O |
| ATOM   | 2                  | C5'                    | DA | A | 1 | -7.088 | -1.316 | -0.770 | 1.00 | 0.00 | C |
| ATOM   | 3                  | C4'                    | DA | A | 1 | -5.591 | -1.521 | -0.882 | 1.00 | 0.00 | C |
| ATOM   | 4                  | O4'                    | DA | A | 1 | -4.979 | -0.326 | -1.384 | 1.00 | 0.00 | O |
| ATOM   | 5                  | C3'                    | DA | A | 1 | -4.893 | -1.817 | 0.455  | 1.00 | 0.00 | C |
| ATOM   | 6                  | O3'                    | DA | A | 1 | -3.776 | -2.649 | 0.159  | 1.00 | 0.00 | O |
| ATOM   | 7                  | C2'                    | DA | A | 1 | -4.423 | -0.433 | 0.884  | 1.00 | 0.00 | C |
| ATOM   | 8                  | C1'                    | DA | A | 1 | -3.985 | 0.111  | -0.467 | 1.00 | 0.00 | C |
| ATOM   | 9                  | N9                     | DA | A | 1 | -3.863 | 1.550  | -0.533 | 1.00 | 0.00 | N |
| ATOM   | 10                 | C8                     | DA | A | 1 | -4.436 | 2.509  | 0.270  | 1.00 | 0.00 | C |
| ATOM   | 11                 | N7                     | DA | A | 1 | -4.003 | 3.722  | 0.039  | 1.00 | 0.00 | N |
| ATOM   | 12                 | C5                     | DA | A | 1 | -3.089 | 3.557  | -0.984 | 1.00 | 0.00 | C |
| ATOM   | 13                 | C6                     | DA | A | 1 | -2.215 | 4.447  | -1.636 | 1.00 | 0.00 | C |
| ATOM   | 14                 | N6                     | DA | A | 1 | -2.114 | 5.748  | -1.266 | 1.00 | 0.00 | N |
| ATOM   | 15                 | N1                     | DA | A | 1 | -1.414 | 3.976  | -2.600 | 1.00 | 0.00 | N |
| ATOM   | 16                 | C2                     | DA | A | 1 | -1.435 | 2.660  | -2.857 | 1.00 | 0.00 | C |
| ATOM   | 17                 | N3                     | DA | A | 1 | -2.170 | 1.711  | -2.284 | 1.00 | 0.00 | N |
| ATOM   | 18                 | C4                     | DA | A | 1 | -2.984 | 2.220  | -1.352 | 1.00 | 0.00 | C |
| ATOM   | 19                 | P                      | DC | A | 2 | -2.907 | -3.279 | 1.407  | 1.00 | 0.00 | P |
| ATOM   | 20                 | OP2                    | DC | A | 2 | -2.163 | -2.194 | 2.139  | 1.00 | 0.00 | O |
| ATOM   | 21                 | OP1                    | DC | A | 2 | -3.772 | -4.217 | 2.191  | 1.00 | 0.00 | O |
| ATOM   | 22                 | O5'                    | DC | A | 2 | -1.864 | -4.171 | 0.520  | 1.00 | 0.00 | O |
| ATOM   | 23                 | C5'                    | DC | A | 2 | -1.548 | -3.963 | -0.848 | 1.00 | 0.00 | C |
| ATOM   | 24                 | C4'                    | DC | A | 2 | -0.401 | -2.999 | -1.074 | 1.00 | 0.00 | C |
| ATOM   | 25                 | O4'                    | DC | A | 2 | -0.834 | -1.645 | -0.910 | 1.00 | 0.00 | O |
| ATOM   | 26                 | C3'                    | DC | A | 2 | 0.810  | -3.199 | -0.128 | 1.00 | 0.00 | C |
| ATOM   | 27                 | O3'                    | DC | A | 2 | 1.955  | -3.386 | -0.958 | 1.00 | 0.00 | O |
| ATOM   | 28                 | C2'                    | DC | A | 2 | 0.841  | -1.887 | 0.651  | 1.00 | 0.00 | C |
| ATOM   | 29                 | C1'                    | DC | A | 2 | 0.286  | -0.933 | -0.399 | 1.00 | 0.00 | C |
| ATOM   | 30                 | N1                     | DC | A | 2 | -0.134 | 0.372  | 0.073  | 1.00 | 0.00 | N |
| ATOM   | 31                 | C2                     | DC | A | 2 | 0.426  | 1.534  | -0.522 | 1.00 | 0.00 | C |
| ATOM   | 32                 | O2                     | DC | A | 2 | 1.206  | 1.417  | -1.461 | 1.00 | 0.00 | O |
| ATOM   | 33                 | N3                     | DC | A | 2 | 0.071  | 2.746  | -0.003 | 1.00 | 0.00 | N |
| ATOM   | 34                 | C4                     | DC | A | 2 | -0.794 | 2.822  | 0.992  | 1.00 | 0.00 | C |
| ATOM   | 35                 | N4                     | DC | A | 2 | -1.108 | 4.054  | 1.460  | 1.00 | 0.00 | N |
| ATOM   | 36                 | C5                     | DC | A | 2 | -1.377 | 1.666  | 1.611  | 1.00 | 0.00 | C |
| ATOM   | 37                 | C6                     | DC | A | 2 | -1.016 | 0.458  | 1.105  | 1.00 | 0.00 | C |
| ATOM   | 38                 | P                      | DC | A | 3 | 3.451  | -3.493 | -0.278 | 1.00 | 0.00 | P |
| ATOM   | 39                 | OP1                    | DC | A | 3 | 4.264  | -4.375 | -1.171 | 1.00 | 0.00 | O |
| ATOM   | 40                 | OP2                    | DC | A | 3 | 3.333  | -3.710 | 1.195  | 1.00 | 0.00 | O |
| ATOM   | 41                 | O5'                    | DC | A | 3 | 3.962  | -1.930 | -0.469 | 1.00 | 0.00 | O |
| ATOM   | 42                 | C5'                    | DC | A | 3 | 4.229  | -1.489 | -1.795 | 1.00 | 0.00 | C |
| ATOM   | 43                 | C4'                    | DC | A | 3 | 5.240  | -0.361 | -1.771 | 1.00 | 0.00 | C |
| ATOM   | 44                 | O4'                    | DC | A | 3 | 4.649  | 0.825  | -1.233 | 1.00 | 0.00 | O |
| ATOM   | 45                 | C3'                    | DC | A | 3 | 6.477  | -0.646 | -0.912 | 1.00 | 0.00 | C |
| ATOM   | 46                 | O3'                    | DC | A | 3 | 7.566  | 0.012  | -1.539 | 1.00 | 0.00 | O |
| ATOM   | 47                 | C2'                    | DC | A | 3 | 6.115  | 0.015  | 0.414  | 1.00 | 0.00 | C |
| ATOM   | 48                 | C1'                    | DC | A | 3 | 5.311  | 1.232  | -0.049 | 1.00 | 0.00 | C |
| ATOM   | 49                 | N1                     | DC | A | 3 | 4.298  | 1.675  | 0.906  | 1.00 | 0.00 | N |
| ATOM   | 50                 | C2                     | DC | A | 3 | 4.373  | 2.969  | 1.470  | 1.00 | 0.00 | C |
| ATOM   | 51                 | O2                     | DC | A | 3 | 5.332  | 3.688  | 1.202  | 1.00 | 0.00 | O |
| ATOM   | 52                 | N3                     | DC | A | 3 | 3.359  | 3.359  | 2.295  | 1.00 | 0.00 | N |
| ATOM   | 53                 | C4                     | DC | A | 3 | 2.372  | 2.526  | 2.579  | 1.00 | 0.00 | C |
| ATOM   | 54                 | N4                     | DC | A | 3 | 1.410  | 2.954  | 3.422  | 1.00 | 0.00 | N |
| ATOM   | 55                 | C5                     | DC | A | 3 | 2.291  | 1.194  | 2.054  | 1.00 | 0.00 | C |
| ATOM   | 56                 | C6                     | DC | A | 3 | 3.269  | 0.832  | 1.192  | 1.00 | 0.00 | C |
| END    |                    |                        |    |   |   |        |        |        |      |      |   |
| COMPND | ACC / M06-2X / PO- | MODEL / SINGLY IONIZED |    |   |   |        |        |        |      |      |   |
| ATOM   | 1                  | O5'                    | DA | A | 1 | -7.125 | -0.479 | 0.519  | 1.00 | 0.00 | O |
| ATOM   | 2                  | C5'                    | DA | A | 1 | -7.010 | -1.611 | -0.327 | 1.00 | 0.00 | C |
| ATOM   | 3                  | C4'                    | DA | A | 1 | -5.543 | -1.918 | -0.560 | 1.00 | 0.00 | C |
| ATOM   | 4                  | O4'                    | DA | A | 1 | -4.924 | -0.838 | -1.279 | 1.00 | 0.00 | O |
| ATOM   | 5                  | C3'                    | DA | A | 1 | -4.697 | -2.083 | 0.705  | 1.00 | 0.00 | C |
| ATOM   | 6                  | O3'                    | DA | A | 1 | -3.590 | -2.901 | 0.345  | 1.00 | 0.00 | O |
| ATOM   | 7                  | C2'                    | DA | A | 1 | -4.229 | -0.658 | 0.969  | 1.00 | 0.00 | C |
| ATOM   | 8                  | C1'                    | DA | A | 1 | -3.989 | -0.178 | -0.460 | 1.00 | 0.00 | C |
| ATOM   | 9                  | N9                     | DA | A | 1 | -4.181 | 1.269  | -0.610 | 1.00 | 0.00 | N |
| ATOM   | 10                 | C8                     | DA | A | 1 | -5.242 | 1.998  | -0.210 | 1.00 | 0.00 | C |
| ATOM   | 11                 | N7                     | DA | A | 1 | -5.130 | 3.316  | -0.464 | 1.00 | 0.00 | N |
| ATOM   | 12                 | C5                     | DA | A | 1 | -3.945 | 3.424  | -1.066 | 1.00 | 0.00 | C |
| ATOM   | 13                 | C6                     | DA | A | 1 | -3.218 | 4.540  | -1.603 | 1.00 | 0.00 | C |
| ATOM   | 14                 | N6                     | DA | A | 1 | -3.677 | 5.766  | -1.527 | 1.00 | 0.00 | N |
| ATOM   | 15                 | N1                     | DA | A | 1 | -2.025 | 4.310  | -2.210 | 1.00 | 0.00 | N |
| ATOM   | 16                 | C2                     | DA | A | 1 | -1.581 | 3.076  | -2.277 | 1.00 | 0.00 | C |
| ATOM   | 17                 | N3                     | DA | A | 1 | -2.176 | 1.922  | -1.811 | 1.00 | 0.00 | N |
| ATOM   | 18                 | C4                     | DA | A | 1 | -3.306 | 2.155  | -1.212 | 1.00 | 0.00 | C |
| ATOM   | 19                 | P                      | DC | A | 2 | -2.583 | -3.437 | 1.535  | 1.00 | 0.00 | P |
| ATOM   | 20                 | OP2                    | DC | A | 2 | -1.894 | -2.271 | 2.193  | 1.00 | 0.00 | O |
| ATOM   | 21                 | OP1                    | DC | A | 2 | -3.304 | -4.427 | 2.392  | 1.00 | 0.00 | O |
| ATOM   | 22                 | O5'                    | DC | A | 2 | -1.527 | -4.248 | 0.592  | 1.00 | 0.00 | O |
| ATOM   | 23                 | C5'                    | DC | A | 2 | -1.340 | -4.077 | -0.807 | 1.00 | 0.00 | C |
| ATOM   | 24                 | C4'                    | DC | A | 2 | -0.206 | -3.132 | -1.153 | 1.00 | 0.00 | C |
| ATOM   | 25                 | O4'                    | DC | A | 2 | -0.629 | -1.766 | -1.024 | 1.00 | 0.00 | O |
| ATOM   | 26                 | C3'                    | DC | A | 2 | 1.061  | -3.290 | -0.273 | 1.00 | 0.00 | C |
| ATOM   | 27                 | O3'                    | DC | A | 2 | 2.171  | -3.389 | -1.167 | 1.00 | 0.00 | O |
| ATOM   | 28                 | C2'                    | DC | A | 2 | 1.036  | -2.002 | 0.548  | 1.00 | 0.00 | C |
| ATOM   | 29                 | C1'                    | DC | A | 2 | 0.483  | -1.048 | -0.500 | 1.00 | 0.00 | C |
| ATOM   | 30                 | N1                     | DC | A | 2 | 0.039  | 0.249  | -0.027 | 1.00 | 0.00 | N |
| ATOM   | 31                 | C2                     | DC | A | 2 | 0.530  | 1.422  | -0.651 | 1.00 | 0.00 | C |
| ATOM   | 32                 | O2                     | DC | A | 2 | 1.296  | 1.338  | -1.604 | 1.00 | 0.00 | O |
| ATOM   | 33                 | N3                     | DC | A | 2 | 0.104  | 2.628  | -0.164 | 1.00 | 0.00 | N |
| ATOM   | 34                 | C4                     | DC | A | 2 | -0.812 | 2.678  | 0.790  | 1.00 | 0.00 | C |
| ATOM   | 35                 | N4                     | DC | A | 2 | -1.321 | 3.893  | 1.086  | 1.00 | 0.00 | N |

|      |    |     |    |   |   |        |        |        |      |      |   |
|------|----|-----|----|---|---|--------|--------|--------|------|------|---|
| ATOM | 36 | C5  | DC | A | 2 | -1.330 | 1.509  | 1.436  | 1.00 | 0.00 | C |
| ATOM | 37 | C6  | DC | A | 2 | -0.870 | 0.315  | 0.982  | 1.00 | 0.00 | C |
| ATOM | 38 | P   | DC | A | 3 | 3.705  | -3.051 | -0.675 | 1.00 | 0.00 | P |
| ATOM | 39 | OP1 | DC | A | 3 | 4.614  | -3.636 | -1.707 | 1.00 | 0.00 | O |
| ATOM | 40 | OP2 | DC | A | 3 | 3.853  | -3.320 | 0.789  | 1.00 | 0.00 | O |
| ATOM | 41 | O5' | DC | A | 3 | 3.701  | -1.407 | -0.829 | 1.00 | 0.00 | O |
| ATOM | 42 | C5' | DC | A | 3 | 4.054  | -0.795 | -2.065 | 1.00 | 0.00 | C |
| ATOM | 43 | C4' | DC | A | 3 | 5.224  | 0.147  | -1.846 | 1.00 | 0.00 | C |
| ATOM | 44 | O4' | DC | A | 3 | 4.801  | 1.298  | -1.109 | 1.00 | 0.00 | O |
| ATOM | 45 | C3' | DC | A | 3 | 6.366  | -0.475 | -1.035 | 1.00 | 0.00 | C |
| ATOM | 46 | O3' | DC | A | 3 | 7.568  | 0.119  | -1.502 | 1.00 | 0.00 | O |
| ATOM | 47 | C2' | DC | A | 3 | 6.041  | -0.032 | 0.390  | 1.00 | 0.00 | C |
| ATOM | 48 | C1' | DC | A | 3 | 5.426  | 1.352  | 0.162  | 1.00 | 0.00 | C |
| ATOM | 49 | N1  | DC | A | 3 | 4.416  | 1.739  | 1.146  | 1.00 | 0.00 | N |
| ATOM | 50 | C2  | DC | A | 3 | 4.555  | 2.950  | 1.866  | 1.00 | 0.00 | C |
| ATOM | 51 | O2  | DC | A | 3 | 5.595  | 3.596  | 1.763  | 1.00 | 0.00 | O |
| ATOM | 52 | N3  | DC | A | 3 | 3.510  | 3.347  | 2.649  | 1.00 | 0.00 | N |
| ATOM | 53 | C4  | DC | A | 3 | 2.428  | 2.594  | 2.749  | 1.00 | 0.00 | C |
| ATOM | 54 | N4  | DC | A | 3 | 1.407  | 3.051  | 3.496  | 1.00 | 0.00 | N |
| ATOM | 55 | C5  | DC | A | 3 | 2.284  | 1.334  | 2.080  | 1.00 | 0.00 | C |
| ATOM | 56 | C6  | DC | A | 3 | 3.294  | 0.975  | 1.257  | 1.00 | 0.00 | C |
| END  |    |     |    |   |   |        |        |        |      |      |   |

| COMPND | AAC | /   | M06-2X | / | PO- | MODEL  | /      | NEUTRAL |      |      |   |
|--------|-----|-----|--------|---|-----|--------|--------|---------|------|------|---|
| ATOM   | 1   | O5' | DA     | A | 1   | -7.349 | -0.395 | 0.191   | 1.00 | 0.00 | O |
| ATOM   | 2   | C5' | DA     | A | 1   | -6.992 | -1.252 | -0.877  | 1.00 | 0.00 | C |
| ATOM   | 3   | C4' | DA     | A | 1   | -5.484 | -1.388 | -0.903  | 1.00 | 0.00 | C |
| ATOM   | 4   | O4' | DA     | A | 1   | -4.898 | -0.137 | -1.290  | 1.00 | 0.00 | O |
| ATOM   | 5   | C3' | DA     | A | 1   | -4.867 | -1.737 | 0.464   | 1.00 | 0.00 | C |
| ATOM   | 6   | O3' | DA     | A | 1   | -3.733 | -2.562 | 0.213   | 1.00 | 0.00 | O |
| ATOM   | 7   | C2' | DA     | A | 1   | -4.416 | -0.371 | 0.973   | 1.00 | 0.00 | C |
| ATOM   | 8   | C1' | DA     | A | 1   | -3.904 | 0.208  | -0.336  | 1.00 | 0.00 | C |
| ATOM   | 9   | N9  | DA     | A | 1   | -3.705 | 1.638  | -0.348  | 1.00 | 0.00 | N |
| ATOM   | 10  | C8  | DA     | A | 1   | -4.064 | 2.583  | 0.584   | 1.00 | 0.00 | C |
| ATOM   | 11  | N7  | DA     | A | 1   | -3.620 | 3.785  | 0.317   | 1.00 | 0.00 | N |
| ATOM   | 12  | C5  | DA     | A | 1   | -2.921 | 3.626  | -0.865  | 1.00 | 0.00 | C |
| ATOM   | 13  | C6  | DA     | A | 1   | -2.148 | 4.506  | -1.647  | 1.00 | 0.00 | C |
| ATOM   | 14  | N6  | DA     | A | 1   | -1.970 | 5.804  | -1.309  | 1.00 | 0.00 | N |
| ATOM   | 15  | N1  | DA     | A | 1   | -1.523 | 4.022  | -2.730  | 1.00 | 0.00 | N |
| ATOM   | 16  | C2  | DA     | A | 1   | -1.638 | 2.714  | -3.005  | 1.00 | 0.00 | C |
| ATOM   | 17  | N3  | DA     | A | 1   | -2.325 | 1.782  | -2.350  | 1.00 | 0.00 | N |
| ATOM   | 18  | C4  | DA     | A | 1   | -2.950 | 2.301  | -1.286  | 1.00 | 0.00 | C |
| ATOM   | 19  | P   | DA     | A | 2   | -3.046 | -3.340 | 1.489   | 1.00 | 0.00 | P |
| ATOM   | 20  | OP1 | DA     | A | 2   | -4.031 | -4.316 | 2.053   | 1.00 | 0.00 | O |
| ATOM   | 21  | OP2 | DA     | A | 2   | -2.378 | -2.354 | 2.411   | 1.00 | 0.00 | O |
| ATOM   | 22  | O5' | DA     | A | 2   | -1.864 | -4.129 | 0.684   | 1.00 | 0.00 | O |
| ATOM   | 23  | C5' | DA     | A | 2   | -1.701 | -4.209 | -0.724  | 1.00 | 0.00 | C |
| ATOM   | 24  | C4' | DA     | A | 2   | -0.498 | -3.399 | -1.169  | 1.00 | 0.00 | C |
| ATOM   | 25  | O4' | DA     | A | 2   | -0.804 | -1.996 | -1.113  | 1.00 | 0.00 | O |
| ATOM   | 26  | C3' | DA     | A | 2   | 0.751  | -3.608 | -0.283  | 1.00 | 0.00 | C |
| ATOM   | 27  | O3' | DA     | A | 2   | 1.875  | -3.673 | -1.163  | 1.00 | 0.00 | O |
| ATOM   | 28  | C2' | DA     | A | 2   | 0.728  | -2.352 | 0.582   | 1.00 | 0.00 | C |
| ATOM   | 29  | C1' | DA     | A | 2   | 0.264  | -1.338 | -0.449  | 1.00 | 0.00 | C |
| ATOM   | 30  | N9  | DA     | A | 2   | -0.190 | -0.081 | 0.094   | 1.00 | 0.00 | N |
| ATOM   | 31  | C8  | DA     | A | 2   | -1.016 | 0.115  | 1.178   | 1.00 | 0.00 | C |
| ATOM   | 32  | N7  | DA     | A | 2   | -1.140 | 1.379  | 1.513   | 1.00 | 0.00 | N |
| ATOM   | 33  | C5  | DA     | A | 2   | -0.338 | 2.049  | 0.607   | 1.00 | 0.00 | C |
| ATOM   | 34  | C6  | DA     | A | 2   | -0.001 | 3.407  | 0.449   | 1.00 | 0.00 | C |
| ATOM   | 35  | N6  | DA     | A | 2   | -0.531 | 4.379  | 1.237   | 1.00 | 0.00 | N |
| ATOM   | 36  | N1  | DA     | A | 2   | 0.899  | 3.740  | -0.487  | 1.00 | 0.00 | N |
| ATOM   | 37  | C2  | DA     | A | 2   | 1.408  | 2.768  | -1.260  | 1.00 | 0.00 | C |
| ATOM   | 38  | N3  | DA     | A | 2   | 1.141  | 1.466  | -1.241  | 1.00 | 0.00 | N |
| ATOM   | 39  | C4  | DA     | A | 2   | 0.266  | 1.161  | -0.278  | 1.00 | 0.00 | C |
| ATOM   | 40  | P   | DC     | A | 3   | 3.409  | -3.364 | -0.650  | 1.00 | 0.00 | P |
| ATOM   | 41  | OP1 | DC     | A | 3   | 4.319  | -3.958 | -1.676  | 1.00 | 0.00 | O |
| ATOM   | 42  | OP2 | DC     | A | 3   | 3.537  | -3.641 | 0.814   | 1.00 | 0.00 | O |
| ATOM   | 43  | O5' | DC     | A | 3   | 3.438  | -1.720 | -0.789  | 1.00 | 0.00 | O |
| ATOM   | 44  | C5' | DC     | A | 3   | 3.834  | -1.096 | -2.005  | 1.00 | 0.00 | C |
| ATOM   | 45  | C4' | DC     | A | 3   | 5.033  | -0.201 | -1.745  | 1.00 | 0.00 | C |
| ATOM   | 46  | O4' | DC     | A | 3   | 4.639  | 0.926  | -0.959  | 1.00 | 0.00 | O |
| ATOM   | 47  | C3' | DC     | A | 3   | 6.157  | -0.889 | -0.964  | 1.00 | 0.00 | C |
| ATOM   | 48  | O3' | DC     | A | 3   | 7.373  | -0.307 | -1.407  | 1.00 | 0.00 | O |
| ATOM   | 49  | C2' | DC     | A | 3   | 5.847  | -0.503 | 0.483   | 1.00 | 0.00 | C |
| ATOM   | 50  | C1' | DC     | A | 3   | 5.250  | 0.898  | 0.322   | 1.00 | 0.00 | C |
| ATOM   | 51  | N1  | DC     | A | 3   | 4.240  | 1.260  | 1.315   | 1.00 | 0.00 | N |
| ATOM   | 52  | C2  | DC     | A | 3   | 4.273  | 2.550  | 1.903   | 1.00 | 0.00 | C |
| ATOM   | 53  | O2  | DC     | A | 3   | 5.255  | 3.266  | 1.731   | 1.00 | 0.00 | O |
| ATOM   | 54  | N3  | DC     | A | 3   | 3.187  | 2.946  | 2.631   | 1.00 | 0.00 | N |
| ATOM   | 55  | C4  | DC     | A | 3   | 2.163  | 2.128  | 2.803   | 1.00 | 0.00 | C |
| ATOM   | 56  | N4  | DC     | A | 3   | 1.097  | 2.578  | 3.505   | 1.00 | 0.00 | N |
| ATOM   | 57  | C5  | DC     | A | 3   | 2.135  | 0.792  | 2.285   | 1.00 | 0.00 | C |
| ATOM   | 58  | C6  | DC     | A | 3   | 3.173  | 0.433  | 1.499   | 1.00 | 0.00 | C |
| END    |     |     |        |   |     |        |        |         |      |      |   |

| COMPND | AAC | /   | M06-2X | / | PO- | MODEL  | /      | SINGLY IONIZED |      |      |   |
|--------|-----|-----|--------|---|-----|--------|--------|----------------|------|------|---|
| ATOM   | 1   | O5' | DA     | A | 1   | -7.282 | 0.442  | -0.256         | 1.00 | 0.00 | O |
| ATOM   | 2   | C5' | DA     | A | 1   | -7.004 | -0.491 | -1.283         | 1.00 | 0.00 | C |
| ATOM   | 3   | C4' | DA     | A | 1   | -5.549 | -0.901 | -1.192         | 1.00 | 0.00 | C |
| ATOM   | 4   | O4' | DA     | A | 1   | -4.712 | 0.211  | -1.548         | 1.00 | 0.00 | O |
| ATOM   | 5   | C3' | DA     | A | 1   | -5.099 | -1.324 | 0.219          | 1.00 | 0.00 | C |
| ATOM   | 6   | O3' | DA     | A | 1   | -4.098 | -2.321 | 0.037          | 1.00 | 0.00 | O |
| ATOM   | 7   | C2' | DA     | A | 1   | -4.475 | -0.036 | 0.748          | 1.00 | 0.00 | C |
| ATOM   | 8   | C1' | DA     | A | 1   | -3.753 | 0.394  | -0.518         | 1.00 | 0.00 | C |
| ATOM   | 9   | N9  | DA     | A | 1   | -3.279 | 1.760  | -0.529         | 1.00 | 0.00 | N |
| ATOM   | 10  | C8  | DA     | A | 1   | -3.599 | 2.806  | 0.307          | 1.00 | 0.00 | C |
| ATOM   | 11  | N7  | DA     | A | 1   | -2.922 | 3.902  | 0.066          | 1.00 | 0.00 | N |
| ATOM   | 12  | C5  | DA     | A | 1   | -2.108 | 3.561  | -0.991         | 1.00 | 0.00 | C |
| ATOM   | 13  | C6  | DA     | A | 1   | -1.122 | 4.274  | -1.710         | 1.00 | 0.00 | C |
| ATOM   | 14  | N6  | DA     | A | 1   | -0.825 | 5.552  | -1.423         | 1.00 | 0.00 | N |
| ATOM   | 15  | N1  | DA     | A | 1   | -0.440 | 3.630  | -2.671         | 1.00 | 0.00 | N |
| ATOM   | 16  | C2  | DA     | A | 1   | -0.735 | 2.344  | -2.916         | 1.00 | 0.00 | C |
| ATOM   | 17  | N3  | DA     | A | 1   | -1.646 | 1.569  | -2.330         | 1.00 | 0.00 | N |
| ATOM   | 18  | C4  | DA     | A | 1   | -2.304 | 2.233  | -1.372         | 1.00 | 0.00 | C |
| ATOM   | 19  | P   | DA     | A | 2   | -3.403 | -3.058 | 1.329          | 1.00 | 0.00 | P |
| ATOM   | 20  | OP1 | DA     | A | 2   | -4.411 | -3.905 | 2.037          | 1.00 | 0.00 | O |
| ATOM   | 21  | OP2 | DA     | A | 2   | -2.599 | -2.068 | 2.134          | 1.00 | 0.00 | O |
| ATOM   | 22  | O5' | DA     | A | 2   | -2.379 | -4.031 | 0.504          | 1.00 | 0.00 | O |
| ATOM   | 23  | C5' | DA     | A | 2   | -2.059 | -3.920 | -0.875         | 1.00 | 0.00 | C |
| ATOM   | 24  | C4' | DA     | A | 2   | -0.795 | -3.124 | -1.126         | 1.00 | 0.00 | C |
| ATOM   | 25  | O4' | DA     | A | 2   | -1.037 | -1.720 | -0.905         | 1.00 | 0.00 | O |
| ATOM   | 26  | C3' | DA     | A | 2   | 0.405  | -3.511 | -0.225         | 1.00 | 0.00 | C |
| ATOM   | 27  | O3' | DA     | A | 2   | 1.541  | -3.644 | -1.082         | 1.00 | 0.00 | O |
| ATOM   | 28  | C2' | DA     | A | 2   | 0.481  | -2.321 | 0.723          | 1.00 | 0.00 | C |
| ATOM   | 29  | C1' | DA     | A | 2   | 0.101  | -1.215 | -0.244         | 1.00 | 0.00 | C |
| ATOM   | 30  | N9  | DA     | A | 2   | -0.204 | 0.065  | 0.376          | 1.00 | 0.00 | N |
| ATOM   | 31  | C8  | DA     | A | 2   | -1.089 | 0.328  | 1.362          | 1.00 | 0.00 | C |
| ATOM   | 32  | N7  | DA     | A | 2   | -1.091 | 1.620  | 1.755          | 1.00 | 0.00 | N |
| ATOM   | 33  | C5  | DA     | A | 2   | -0.145 | 2.189  | 1.002          | 1.00 | 0.00 | C |

|      |    |     |    |   |   |        |        |        |      |      |   |
|------|----|-----|----|---|---|--------|--------|--------|------|------|---|
| ATOM | 34 | C6  | DA | A | 2 | 0.373  | 3.525  | 0.909  | 1.00 | 0.00 | C |
| ATOM | 35 | N6  | DA | A | 2 | -0.157 | 4.517  | 1.588  | 1.00 | 0.00 | N |
| ATOM | 36 | N1  | DA | A | 2 | 1.411  | 3.769  | 0.071  | 1.00 | 0.00 | N |
| ATOM | 37 | C2  | DA | A | 2 | 1.879  | 2.779  | -0.655 | 1.00 | 0.00 | C |
| ATOM | 38 | N3  | DA | A | 2 | 1.441  | 1.477  | -0.711 | 1.00 | 0.00 | N |
| ATOM | 39 | C4  | DA | A | 2 | 0.465  | 1.248  | 0.120  | 1.00 | 0.00 | C |
| ATOM | 40 | F   | DC | A | 3 | 3.091  | -3.314 | -0.637 | 1.00 | 0.00 | P |
| ATOM | 41 | OP1 | DC | A | 3 | 3.954  | -3.928 | -1.690 | 1.00 | 0.00 | O |
| ATOM | 42 | OP2 | DC | A | 3 | 3.295  | -3.559 | 0.828  | 1.00 | 0.00 | O |
| ATOM | 43 | O5' | DC | A | 3 | 3.113  | -1.674 | -0.790 | 1.00 | 0.00 | O |
| ATOM | 44 | O5' | DC | A | 3 | 3.443  | -1.068 | -2.034 | 1.00 | 0.00 | O |
| ATOM | 45 | C4' | DC | A | 3 | 4.712  | -0.254 | -1.874 | 1.00 | 0.00 | C |
| ATOM | 46 | O4' | DC | A | 3 | 4.509  | 0.832  | -0.969 | 1.00 | 0.00 | O |
| ATOM | 47 | C3' | DC | A | 3 | 5.887  | -1.039 | -1.294 | 1.00 | 0.00 | C |
| ATOM | 48 | O3' | DC | A | 3 | 7.066  | -0.409 | -1.770 | 1.00 | 0.00 | O |
| ATOM | 49 | C2' | DC | A | 3 | 5.714  | -0.846 | 0.217  | 1.00 | 0.00 | C |
| ATOM | 50 | C1' | DC | A | 3 | 5.048  | 0.534  | 0.306  | 1.00 | 0.00 | C |
| ATOM | 51 | N1  | DC | A | 3 | 4.002  | 0.687  | 1.332  | 1.00 | 0.00 | N |
| ATOM | 52 | C2  | DC | A | 3 | 3.675  | 2.032  | 1.660  | 1.00 | 0.00 | C |
| ATOM | 53 | O2  | DC | A | 3 | 4.292  | 2.940  | 1.110  | 1.00 | 0.00 | O |
| ATOM | 54 | N3  | DC | A | 3 | 2.678  | 2.260  | 2.561  | 1.00 | 0.00 | N |
| ATOM | 55 | C4  | DC | A | 3 | 2.047  | 1.238  | 3.128  | 1.00 | 0.00 | C |
| ATOM | 56 | N4  | DC | A | 3 | 1.113  | 1.523  | 4.050  | 1.00 | 0.00 | N |
| ATOM | 57 | C5  | DC | A | 3 | 2.317  | -0.123 | 2.783  | 1.00 | 0.00 | C |
| ATOM | 58 | C6  | DC | A | 3 | 3.298  | -0.342 | 1.870  | 1.00 | 0.00 | C |
| END  |    |     |    |   |   |        |        |        |      |      |   |

| COMPND | CCA / M06-2X / | PO- | MODEL / | NEUTRAL |   |        |        |        |      |      |   |
|--------|----------------|-----|---------|---------|---|--------|--------|--------|------|------|---|
| ATOM   | 1              | O5' | DC      | A       | 1 | -7.342 | -0.870 | 0.004  | 1.00 | 0.00 | O |
| ATOM   | 2              | C5' | DC      | A       | 1 | -7.024 | -1.924 | -0.888 | 1.00 | 0.00 | C |
| ATOM   | 3              | C4' | DC      | A       | 1 | -5.516 | -2.029 | -1.013 | 1.00 | 0.00 | C |
| ATOM   | 4              | O4' | DC      | A       | 1 | -5.005 | -0.856 | -1.652 | 1.00 | 0.00 | O |
| ATOM   | 5              | C3' | DC      | A       | 1 | -4.772 | -2.129 | 0.326  | 1.00 | 0.00 | C |
| ATOM   | 6              | O3' | DC      | A       | 1 | -3.577 | -2.871 | 0.082  | 1.00 | 0.00 | O |
| ATOM   | 7              | C2' | DC      | A       | 1 | -4.439 | -0.673 | 0.619  | 1.00 | 0.00 | C |
| ATOM   | 8              | C1' | DC      | A       | 1 | -4.098 | -0.180 | -0.784 | 1.00 | 0.00 | C |
| ATOM   | 9              | N1  | DC      | A       | 1 | -4.246 | 1.252  | -0.979 | 1.00 | 0.00 | N |
| ATOM   | 10             | C2  | DC      | A       | 1 | -3.180 | 1.987  | -1.559 | 1.00 | 0.00 | C |
| ATOM   | 11             | O2  | DC      | A       | 1 | -2.197 | 1.389  | -1.982 | 1.00 | 0.00 | O |
| ATOM   | 12             | N3  | DC      | A       | 1 | -3.306 | 3.345  | -1.606 | 1.00 | 0.00 | N |
| ATOM   | 13             | C4  | DC      | A       | 1 | -4.428 | 3.925  | -1.217 | 1.00 | 0.00 | C |
| ATOM   | 14             | N4  | DC      | A       | 1 | -4.473 | 5.269  | -1.236 | 1.00 | 0.00 | N |
| ATOM   | 15             | C5  | DC      | A       | 1 | -5.582 | 3.190  | -0.776 | 1.00 | 0.00 | C |
| ATOM   | 16             | C6  | DC      | A       | 1 | -5.430 | 1.850  | -0.673 | 1.00 | 0.00 | C |
| ATOM   | 17             | F   | DC      | A       | 2 | -2.699 | -3.370 | 1.382  | 1.00 | 0.00 | P |
| ATOM   | 18             | OP1 | DC      | A       | 2 | -3.437 | -4.460 | 2.096  | 1.00 | 0.00 | O |
| ATOM   | 19             | OP2 | DC      | A       | 2 | -2.216 | -2.184 | 2.172  | 1.00 | 0.00 | O |
| ATOM   | 20             | O5' | DC      | A       | 2 | -1.449 | -4.045 | 0.576  | 1.00 | 0.00 | O |
| ATOM   | 21             | C5' | DC      | A       | 2 | -1.102 | -3.858 | -0.789 | 1.00 | 0.00 | C |
| ATOM   | 22             | C4' | DC      | A       | 2 | 0.042  | -2.878 | -0.983 | 1.00 | 0.00 | C |
| ATOM   | 23             | O4' | DC      | A       | 2 | -0.439 | -1.531 | -0.952 | 1.00 | 0.00 | O |
| ATOM   | 24             | C3' | DC      | A       | 2 | 1.145  | -2.971 | 0.096  | 1.00 | 0.00 | C |
| ATOM   | 25             | O3' | DC      | A       | 2 | 2.399  | -2.899 | -0.586 | 1.00 | 0.00 | O |
| ATOM   | 26             | C2' | DC      | A       | 2 | 0.886  | -1.718 | 0.926  | 1.00 | 0.00 | C |
| ATOM   | 27             | C1' | DC      | A       | 2 | 0.496  | -0.763 | -0.193 | 1.00 | 0.00 | C |
| ATOM   | 28             | N1  | DC      | A       | 2 | -0.116 | 0.496  | 0.175  | 1.00 | 0.00 | N |
| ATOM   | 29             | C2  | DC      | A       | 2 | 0.337  | 1.687  | -0.448 | 1.00 | 0.00 | C |
| ATOM   | 30             | O2  | DC      | A       | 2 | 1.240  | 1.633  | -1.277 | 1.00 | 0.00 | O |
| ATOM   | 31             | N3  | DC      | A       | 2 | -0.242 | 2.863  | -0.068 | 1.00 | 0.00 | N |
| ATOM   | 32             | C4  | DC      | A       | 2 | -1.242 | 2.866  | 0.787  | 1.00 | 0.00 | C |
| ATOM   | 33             | N4  | DC      | A       | 2 | -1.742 | 4.076  | 1.166  | 1.00 | 0.00 | N |
| ATOM   | 34             | C5  | DC      | A       | 2 | -1.770 | 1.674  | 1.379  | 1.00 | 0.00 | C |
| ATOM   | 35             | C6  | DC      | A       | 2 | -1.163 | 0.509  | 1.037  | 1.00 | 0.00 | C |
| ATOM   | 36             | F   | DA      | A       | 3 | 3.798  | -3.229 | 0.223  | 1.00 | 0.00 | P |
| ATOM   | 37             | OP1 | DA      | A       | 3 | 4.359  | -4.512 | -0.303 | 1.00 | 0.00 | O |
| ATOM   | 38             | OP2 | DA      | A       | 3 | 3.619  | -2.974 | 1.686  | 1.00 | 0.00 | O |
| ATOM   | 39             | O5' | DA      | A       | 3 | 4.701  | -1.971 | -0.336 | 1.00 | 0.00 | O |
| ATOM   | 40             | C5' | DA      | A       | 3 | 4.915  | -1.854 | -1.733 | 1.00 | 0.00 | C |
| ATOM   | 41             | C4' | DA      | A       | 3 | 5.583  | -0.521 | -2.009 | 1.00 | 0.00 | C |
| ATOM   | 42             | O4' | DA      | A       | 3 | 4.701  | 0.545  | -1.643 | 1.00 | 0.00 | O |
| ATOM   | 43             | C3' | DA      | A       | 3 | 6.877  | -0.275 | -1.229 | 1.00 | 0.00 | C |
| ATOM   | 44             | O3' | DA      | A       | 3 | 7.675  | 0.573  | -2.040 | 1.00 | 0.00 | O |
| ATOM   | 45             | C2' | DA      | A       | 3 | 6.380  | 0.455  | 0.014  | 1.00 | 0.00 | C |
| ATOM   | 46             | C1' | DA      | A       | 3 | 5.217  | 1.276  | -0.545 | 1.00 | 0.00 | C |
| ATOM   | 47             | N9  | DA      | A       | 3 | 4.164  | 1.515  | 0.422  | 1.00 | 0.00 | N |
| ATOM   | 48             | C8  | DA      | A       | 3 | 3.489  | 0.575  | 1.169  | 1.00 | 0.00 | C |
| ATOM   | 49             | N7  | DA      | A       | 3 | 2.545  | 1.085  | 1.921  | 1.00 | 0.00 | N |
| ATOM   | 50             | C5  | DA      | A       | 3 | 2.592  | 2.436  | 1.648  | 1.00 | 0.00 | C |
| ATOM   | 51             | C6  | DA      | A       | 3 | 1.817  | 3.523  | 2.090  | 1.00 | 0.00 | C |
| ATOM   | 52             | N6  | DA      | A       | 3 | 0.835  | 3.375  | 3.018  | 1.00 | 0.00 | N |
| ATOM   | 53             | N1  | DA      | A       | 3 | 2.085  | 4.745  | 1.608  | 1.00 | 0.00 | N |
| ATOM   | 54             | C2  | DA      | A       | 3 | 3.073  | 4.870  | 0.709  | 1.00 | 0.00 | C |
| ATOM   | 55             | N3  | DA      | A       | 3 | 3.865  | 3.930  | 0.202  | 1.00 | 0.00 | N |
| ATOM   | 56             | C4  | DA      | A       | 3 | 3.576  | 2.723  | 0.706  | 1.00 | 0.00 | C |
| END    |                |     |         |         |   |        |        |        |      |      |   |

| COMPND | CCA / M06-2X / | PO- | MODEL / | SINGLY IONIZED |   |        |        |        |      |      |   |
|--------|----------------|-----|---------|----------------|---|--------|--------|--------|------|------|---|
| ATOM   | 1              | O5' | DC      | A              | 1 | -7.286 | -0.330 | -0.186 | 1.00 | 0.00 | O |
| ATOM   | 2              | C5' | DC      | A              | 1 | -7.026 | -1.451 | -1.014 | 1.00 | 0.00 | C |
| ATOM   | 3              | C4' | DC      | A              | 1 | -5.532 | -1.709 | -1.042 | 1.00 | 0.00 | C |
| ATOM   | 4              | O4' | DC      | A              | 1 | -4.868 | -0.630 | -1.706 | 1.00 | 0.00 | O |
| ATOM   | 5              | C3' | DC      | A              | 1 | -4.880 | -1.809 | 0.344  | 1.00 | 0.00 | C |
| ATOM   | 6              | O3' | DC      | A              | 1 | -3.763 | -2.684 | 0.211  | 1.00 | 0.00 | O |
| ATOM   | 7              | C2' | DC      | A              | 1 | -4.411 | -0.380 | 0.582  | 1.00 | 0.00 | C |
| ATOM   | 8              | C1' | DC      | A              | 1 | -3.947 | 0.003  | -0.822 | 1.00 | 0.00 | C |
| ATOM   | 9              | N1  | DC      | A              | 1 | -3.954 | 1.433  | -1.088 | 1.00 | 0.00 | N |
| ATOM   | 10             | C2  | DC      | A              | 1 | -2.796 | 2.055  | -1.621 | 1.00 | 0.00 | C |
| ATOM   | 11             | O2  | DC      | A              | 1 | -1.841 | 1.365  | -1.964 | 1.00 | 0.00 | O |
| ATOM   | 12             | N3  | DC      | A              | 1 | -2.801 | 3.416  | -1.716 | 1.00 | 0.00 | N |
| ATOM   | 13             | C4  | DC      | A              | 1 | -3.893 | 4.102  | -1.422 | 1.00 | 0.00 | C |
| ATOM   | 14             | N4  | DC      | A              | 1 | -3.822 | 5.443  | -1.494 | 1.00 | 0.00 | N |
| ATOM   | 15             | C5  | DC      | A              | 1 | -5.131 | 3.482  | -1.038 | 1.00 | 0.00 | C |
| ATOM   | 16             | C6  | DC      | A              | 1 | -5.100 | 2.140  | -0.881 | 1.00 | 0.00 | C |
| ATOM   | 17             | F   | DC      | A              | 2 | -2.985 | -3.179 | 1.574  | 1.00 | 0.00 | P |
| ATOM   | 18             | OP2 | DC      | A              | 2 | -2.325 | -2.013 | 2.262  | 1.00 | 0.00 | O |
| ATOM   | 19             | OP1 | DC      | A              | 2 | -3.889 | -4.068 | 2.370  | 1.00 | 0.00 | O |
| ATOM   | 20             | O5' | DC      | A              | 2 | -1.850 | -4.116 | 0.862  | 1.00 | 0.00 | O |
| ATOM   | 21             | C5' | DC      | A              | 2 | -1.448 | -4.051 | -0.498 | 1.00 | 0.00 | C |
| ATOM   | 22             | C4' | DC      | A              | 2 | -0.267 | -3.134 | -0.740 | 1.00 | 0.00 | C |
| ATOM   | 23             | O4' | DC      | A              | 2 | -0.679 | -1.763 | -0.713 | 1.00 | 0.00 | O |
| ATOM   | 24             | C3' | DC      | A              | 2 | 0.894  | -3.275 | 0.286  | 1.00 | 0.00 | C |
| ATOM   | 25             | O3' | DC      | A              | 2 | 2.083  | -3.532 | -0.470 | 1.00 | 0.00 | O |
| ATOM   | 26             | C2' | DC      | A              | 2 | 0.853  | -1.924 | 0.990  | 1.00 | 0.00 | C |
| ATOM   | 27             | C1' | DC      | A              | 2 | 0.413  | -1.037 | -0.163 | 1.00 | 0.00 | C |
| ATOM   | 28             | N1  | DC      | A              | 2 | -0.013 | 0.303  | 0.190  | 1.00 | 0.00 | N |
| ATOM   | 29             | C2  | DC      | A              | 2 | 0.723  | 1.400  | -0.304 | 1.00 | 0.00 | C |
| ATOM   | 30             | O2  | DC      | A              | 2 | 1.742  | 1.201  | -0.965 | 1.00 | 0.00 | O |
| ATOM   | 31             | N3  | DC      | A              | 2 | 0.302  | 2.654  | 0.030  | 1.00 | 0.00 | N |

|      |    |     |    |   |   |        |        |        |      |      |   |
|------|----|-----|----|---|---|--------|--------|--------|------|------|---|
| ATOM | 32 | C4  | DC | A | 2 | -0.777 | 2.816  | 0.780  | 1.00 | 0.00 | C |
| ATOM | 33 | N4  | DC | A | 2 | -1.107 | 4.085  | 1.117  | 1.00 | 0.00 | N |
| ATOM | 34 | C5  | DC | A | 2 | -1.524 | 1.722  | 1.317  | 1.00 | 0.00 | C |
| ATOM | 35 | C6  | DC | A | 2 | -1.090 | 0.476  | 0.995  | 1.00 | 0.00 | C |
| ATOM | 36 | P   | DA | A | 3 | 3.585  | -2.975 | -0.136 | 1.00 | 0.00 | P |
| ATOM | 37 | OP1 | DA | A | 3 | 4.506  | -3.753 | -1.019 | 1.00 | 0.00 | O |
| ATOM | 38 | OP2 | DA | A | 3 | 3.815  | -2.830 | 1.342  | 1.00 | 0.00 | O |
| ATOM | 39 | O5' | DA | A | 3 | 3.484  | -1.419 | -0.667 | 1.00 | 0.00 | O |
| ATOM | 40 | C5' | DA | A | 3 | 3.685  | -1.104 | -2.038 | 1.00 | 0.00 | C |
| ATOM | 41 | C4' | DA | A | 3 | 4.959  | -0.296 | -2.197 | 1.00 | 0.00 | C |
| ATOM | 42 | O4' | DA | A | 3 | 4.840  | 0.997  | -1.567 | 1.00 | 0.00 | O |
| ATOM | 43 | C3' | DA | A | 3 | 6.187  | -0.917 | -1.532 | 1.00 | 0.00 | C |
| ATOM | 44 | O3' | DA | A | 3 | 7.316  | -0.430 | -2.238 | 1.00 | 0.00 | O |
| ATOM | 45 | C2' | DA | A | 3 | 6.130  | -0.346 | -0.106 | 1.00 | 0.00 | C |
| ATOM | 46 | C1' | DA | A | 3 | 5.381  | 0.982  | -0.298 | 1.00 | 0.00 | C |
| ATOM | 47 | N9  | DA | A | 3 | 4.305  | 1.202  | 0.696  | 1.00 | 0.00 | N |
| ATOM | 48 | C8  | DA | A | 3 | 3.639  | 0.337  | 1.485  | 1.00 | 0.00 | C |
| ATOM | 49 | N7  | DA | A | 3 | 2.661  | 0.910  | 2.227  | 1.00 | 0.00 | N |
| ATOM | 50 | C5  | DA | A | 3 | 2.698  | 2.190  | 1.871  | 1.00 | 0.00 | C |
| ATOM | 51 | C6  | DA | A | 3 | 1.948  | 3.340  | 2.284  | 1.00 | 0.00 | C |
| ATOM | 52 | N6  | DA | A | 3 | 1.025  | 3.264  | 3.215  | 1.00 | 0.00 | N |
| ATOM | 53 | N1  | DA | A | 3 | 2.222  | 4.539  | 1.708  | 1.00 | 0.00 | N |
| ATOM | 54 | C2  | DA | A | 3 | 3.173  | 4.590  | 0.805  | 1.00 | 0.00 | C |
| ATOM | 55 | N3  | DA | A | 3 | 3.983  | 3.582  | 0.341  | 1.00 | 0.00 | N |
| ATOM | 56 | C4  | DA | A | 3 | 3.706  | 2.434  | 0.886  | 1.00 | 0.00 | C |
| END  |    |     |    |   |   |        |        |        |      |      |   |

| COMPND | CAA / M06-2X / | PO- | MODEL / | NEUTRAL |   |        |        |        |      |      |   |
|--------|----------------|-----|---------|---------|---|--------|--------|--------|------|------|---|
| ATOM   | 1              | O5' | DC      | A       | 1 | -7.289 | -0.728 | 0.077  | 1.00 | 0.00 | O |
| ATOM   | 2              | C5' | DC      | A       | 1 | -7.020 | -1.785 | -0.828 | 1.00 | 0.00 | C |
| ATOM   | 3              | C4' | DC      | A       | 1 | -5.518 | -1.942 | -0.971 | 1.00 | 0.00 | C |
| ATOM   | 4              | O4' | DC      | A       | 1 | -4.974 | -0.783 | -1.609 | 1.00 | 0.00 | O |
| ATOM   | 5              | C3' | DC      | A       | 1 | -4.767 | -2.075 | 0.360  | 1.00 | 0.00 | C |
| ATOM   | 6              | O3' | DC      | A       | 1 | -3.599 | -2.857 | 0.110  | 1.00 | 0.00 | O |
| ATOM   | 7              | C2' | DC      | A       | 1 | -4.379 | -0.634 | 0.658  | 1.00 | 0.00 | C |
| ATOM   | 8              | C1' | DC      | A       | 1 | -4.038 | -0.144 | -0.746 | 1.00 | 0.00 | C |
| ATOM   | 9              | N1  | DC      | A       | 1 | -4.136 | 1.294  | -0.929 | 1.00 | 0.00 | N |
| ATOM   | 10             | C2  | DC      | A       | 1 | -3.077 | 1.985  | -1.570 | 1.00 | 0.00 | C |
| ATOM   | 11             | O2  | DC      | A       | 1 | -2.156 | 1.349  | -2.070 | 1.00 | 0.00 | O |
| ATOM   | 12             | N3  | DC      | A       | 1 | -3.137 | 3.348  | -1.587 | 1.00 | 0.00 | N |
| ATOM   | 13             | C4  | DC      | A       | 1 | -4.214 | 3.973  | -1.143 | 1.00 | 0.00 | C |
| ATOM   | 14             | N4  | DC      | A       | 1 | -4.196 | 5.319  | -1.140 | 1.00 | 0.00 | N |
| ATOM   | 15             | C5  | DC      | A       | 1 | -5.382 | 3.284  | -0.669 | 1.00 | 0.00 | C |
| ATOM   | 16             | C6  | DC      | A       | 1 | -5.283 | 1.939  | -0.577 | 1.00 | 0.00 | C |
| ATOM   | 17             | P   | DA      | A       | 2 | -2.818 | -3.471 | 1.422  | 1.00 | 0.00 | P |
| ATOM   | 18             | OP1 | DA      | A       | 2 | -3.672 | -4.525 | 2.057  | 1.00 | 0.00 | O |
| ATOM   | 19             | OP2 | DA      | A       | 2 | -2.281 | -2.356 | 2.278  | 1.00 | 0.00 | O |
| ATOM   | 20             | O5' | DA      | A       | 2 | -1.567 | -4.187 | 0.655  | 1.00 | 0.00 | O |
| ATOM   | 21             | C5' | DA      | A       | 2 | -1.261 | -4.158 | -0.731 | 1.00 | 0.00 | C |
| ATOM   | 22             | C4' | DA      | A       | 2 | -0.046 | -3.294 | -1.024 | 1.00 | 0.00 | C |
| ATOM   | 23             | O4' | DA      | A       | 2 | -0.415 | -1.908 | -1.056 | 1.00 | 0.00 | O |
| ATOM   | 24             | C3' | DA      | A       | 2 | 1.073  | -3.416 | 0.031  | 1.00 | 0.00 | C |
| ATOM   | 25             | O3' | DA      | A       | 2 | 2.306  | -3.408 | -0.687 | 1.00 | 0.00 | O |
| ATOM   | 26             | C2' | DA      | A       | 2 | 0.869  | -2.150 | 0.852  | 1.00 | 0.00 | C |
| ATOM   | 27             | C1' | DA      | A       | 2 | 0.506  | -1.176 | -0.256 | 1.00 | 0.00 | C |
| ATOM   | 28             | N9  | DA      | A       | 2 | -0.104 | 0.058  | 0.166  | 1.00 | 0.00 | N |
| ATOM   | 29             | C8  | DA      | A       | 2 | -1.057 | 0.230  | 1.140  | 1.00 | 0.00 | C |
| ATOM   | 30             | N7  | DA      | A       | 2 | -1.393 | 1.486  | 1.325  | 1.00 | 0.00 | N |
| ATOM   | 31             | C5  | DA      | A       | 2 | -0.605 | 2.180  | 0.426  | 1.00 | 0.00 | C |
| ATOM   | 32             | C6  | DA      | A       | 2 | -0.476 | 3.544  | 0.127  | 1.00 | 0.00 | C |
| ATOM   | 33             | N6  | DA      | A       | 2 | -1.183 | 4.499  | 0.794  | 1.00 | 0.00 | N |
| ATOM   | 34             | N1  | DA      | A       | 2 | 0.421  | 3.321  | -0.796 | 1.00 | 0.00 | N |
| ATOM   | 35             | C2  | DA      | A       | 2 | 1.148  | 2.970  | -1.400 | 1.00 | 0.00 | C |
| ATOM   | 36             | N3  | DA      | A       | 2 | 1.105  | 1.652  | -1.226 | 1.00 | 0.00 | N |
| ATOM   | 37             | C4  | DA      | A       | 2 | 0.204  | 1.311  | -0.301 | 1.00 | 0.00 | C |
| ATOM   | 38             | P   | DA      | A       | 3 | 3.756  | -3.513 | 0.092  | 1.00 | 0.00 | P |
| ATOM   | 39             | OP1 | DA      | A       | 3 | 4.530  | -4.619 | -0.551 | 1.00 | 0.00 | O |
| ATOM   | 40             | OP2 | DA      | A       | 3 | 3.562  | -3.414 | 1.570  | 1.00 | 0.00 | O |
| ATOM   | 41             | O5' | DA      | A       | 3 | 4.403  | -2.068 | -0.374 | 1.00 | 0.00 | O |
| ATOM   | 42             | C5' | DA      | A       | 3 | 4.617  | -1.865 | -1.762 | 1.00 | 0.00 | C |
| ATOM   | 43             | C4' | DA      | A       | 3 | 5.322  | -0.539 | -1.966 | 1.00 | 0.00 | C |
| ATOM   | 44             | O4' | DA      | A       | 3 | 4.479  | 0.533  | -1.531 | 1.00 | 0.00 | O |
| ATOM   | 45             | C3' | DA      | A       | 3 | 6.630  | -0.383 | -1.185 | 1.00 | 0.00 | C |
| ATOM   | 46             | O3' | DA      | A       | 3 | 7.456  | 0.476  | -1.955 | 1.00 | 0.00 | O |
| ATOM   | 47             | C2' | DA      | A       | 3 | 6.168  | 0.296  | 0.099  | 1.00 | 0.00 | C |
| ATOM   | 48             | C1' | DA      | A       | 3 | 5.036  | 1.191  | -0.408 | 1.00 | 0.00 | C |
| ATOM   | 49             | N9  | DA      | A       | 3 | 3.997  | 1.422  | 0.574  | 1.00 | 0.00 | N |
| ATOM   | 50             | C8  | DA      | A       | 3 | 3.248  | 0.466  | 1.222  | 1.00 | 0.00 | C |
| ATOM   | 51             | N7  | DA      | A       | 3 | 2.308  | 0.963  | 1.987  | 1.00 | 0.00 | N |
| ATOM   | 52             | C5  | DA      | A       | 3 | 2.438  | 2.330  | 1.828  | 1.00 | 0.00 | C |
| ATOM   | 53             | C6  | DA      | A       | 3 | 1.711  | 3.426  | 2.330  | 1.00 | 0.00 | C |
| ATOM   | 54             | N6  | DA      | A       | 3 | 0.650  | 3.271  | 3.167  | 1.00 | 0.00 | N |
| ATOM   | 55             | N1  | DA      | A       | 3 | 2.093  | 4.664  | 1.986  | 1.00 | 0.00 | N |
| ATOM   | 56             | C2  | DA      | A       | 3 | 3.122  | 4.803  | 1.139  | 1.00 | 0.00 | C |
| ATOM   | 57             | N3  | DA      | A       | 3 | 3.861  | 3.859  | 0.564  | 1.00 | 0.00 | N |
| ATOM   | 58             | C4  | DA      | A       | 3 | 3.475  | 2.635  | 0.948  | 1.00 | 0.00 | C |
| END    |                |     |         |         |   |        |        |        |      |      |   |

| COMPND | CAA / M06-2X / | PO- | MODEL / | SINGLY IONIZED |   |        |        |        |      |      |   |
|--------|----------------|-----|---------|----------------|---|--------|--------|--------|------|------|---|
| ATOM   | 1              | O5' | DC      | A              | 1 | -7.072 | -0.991 | -0.518 | 1.00 | 0.00 | O |
| ATOM   | 2              | C5' | DC      | A              | 1 | -6.518 | -2.012 | -1.332 | 1.00 | 0.00 | C |
| ATOM   | 3              | C4' | DC      | A              | 1 | -5.009 | -1.979 | -1.191 | 1.00 | 0.00 | C |
| ATOM   | 4              | O4' | DC      | A              | 1 | -4.504 | -0.766 | -1.761 | 1.00 | 0.00 | O |
| ATOM   | 5              | C3' | DC      | A              | 1 | -4.512 | -1.995 | 0.261  | 1.00 | 0.00 | C |
| ATOM   | 6              | O3' | DC      | A              | 1 | -3.235 | -2.631 | 0.278  | 1.00 | 0.00 | O |
| ATOM   | 7              | C2' | DC      | A              | 1 | -4.340 | -0.515 | 0.569  | 1.00 | 0.00 | C |
| ATOM   | 8              | C1' | DC      | A              | 1 | -3.827 | -0.001 | -0.776 | 1.00 | 0.00 | C |
| ATOM   | 9              | N1  | DC      | A              | 1 | -4.100 | 1.410  | -1.024 | 1.00 | 0.00 | N |
| ATOM   | 10             | C2  | DC      | A              | 1 | -3.056 | 2.281  | -1.395 | 1.00 | 0.00 | C |
| ATOM   | 11             | O2  | DC      | A              | 1 | -1.920 | 1.822  | -1.571 | 1.00 | 0.00 | O |
| ATOM   | 12             | N3  | DC      | A              | 1 | -3.336 | 3.601  | -1.529 | 1.00 | 0.00 | N |
| ATOM   | 13             | C4  | DC      | A              | 1 | -4.590 | 4.028  | -1.427 | 1.00 | 0.00 | C |
| ATOM   | 14             | N4  | DC      | A              | 1 | -4.807 | 5.344  | -1.560 | 1.00 | 0.00 | N |
| ATOM   | 15             | C5  | DC      | A              | 1 | -5.696 | 3.144  | -1.197 | 1.00 | 0.00 | C |
| ATOM   | 16             | C6  | DC      | A              | 1 | -5.393 | 1.842  | -0.997 | 1.00 | 0.00 | C |
| ATOM   | 17             | P   | DA      | A              | 2 | -2.826 | -3.383 | 1.688  | 1.00 | 0.00 | P |
| ATOM   | 18             | OP1 | DA      | A              | 2 | -3.735 | -4.551 | 1.895  | 1.00 | 0.00 | O |
| ATOM   | 19             | OP2 | DA      | A              | 2 | -2.627 | -2.350 | 2.762  | 1.00 | 0.00 | O |
| ATOM   | 20             | O5' | DA      | A              | 2 | -1.322 | -3.852 | 1.258  | 1.00 | 0.00 | O |
| ATOM   | 21             | C5' | DA      | A              | 2 | -1.056 | -4.469 | 0.008  | 1.00 | 0.00 | C |
| ATOM   | 22             | C4' | DA      | A              | 2 | 0.113  | -3.757 | -0.652 | 1.00 | 0.00 | C |
| ATOM   | 23             | O4' | DA      | A              | 2 | -0.249 | -2.384 | -0.879 | 1.00 | 0.00 | O |
| ATOM   | 24             | C3' | DA      | A              | 2 | 1.408  | -3.711 | 0.182  | 1.00 | 0.00 | C |
| ATOM   | 25             | O3' | DA      | A              | 2 | 2.487  | -3.695 | -0.756 | 1.00 | 0.00 | O |
| ATOM   | 26             | C2' | DA      | A              | 2 | 1.243  | -2.393 | 0.924  | 1.00 | 0.00 | C |
| ATOM   | 27             | C1' | DA      | A              | 2 | 0.653  | -1.546 | -0.188 | 1.00 | 0.00 | C |
| ATOM   | 28             | N9  | DA      | A              | 2 | -0.034 | -0.355 | 0.288  | 1.00 | 0.00 | N |
| ATOM   | 29             | C8  | DA      | A              | 2 | -0.966 | -0.232 | 1.262  | 1.00 | 0.00 | C |

|        |       |         |     |       |                  |        |        |        |      |      |   |
|--------|-------|---------|-----|-------|------------------|--------|--------|--------|------|------|---|
| ATOM   | 30    | N7      | DA  | A     | 2                | -1.320 | 1.045  | 1.511  | 1.00 | 0.00 | N |
| ATOM   | 31    | C5      | DA  | A     | 2                | -0.566 | 1.758  | 0.674  | 1.00 | 0.00 | C |
| ATOM   | 32    | C6      | DA  | A     | 2                | -0.477 | 3.160  | 0.379  | 1.00 | 0.00 | C |
| ATOM   | 33    | N6      | DA  | A     | 2                | -1.252 | 4.033  | 0.978  | 1.00 | 0.00 | N |
| ATOM   | 34    | N1      | DA  | A     | 2                | 0.434  | 3.581  | -0.533 | 1.00 | 0.00 | N |
| ATOM   | 35    | C2      | DA  | A     | 2                | 1.169  | 2.675  | -1.143 | 1.00 | 0.00 | C |
| ATOM   | 36    | N3      | DA  | A     | 2                | 1.136  | 1.312  | -1.018 | 1.00 | 0.00 | N |
| ATOM   | 37    | C4      | DA  | A     | 2                | 0.277  | 0.923  | -0.122 | 1.00 | 0.00 | C |
| ATOM   | 38    | P       | DA  | A     | 3                | 3.955  | -2.997 | -0.474 | 1.00 | 0.00 | P |
| ATOM   | 39    | OP1     | DA  | A     | 3                | 4.890  | -3.589 | -1.477 | 1.00 | 0.00 | O |
| ATOM   | 40    | OP2     | DA  | A     | 3                | 4.247  | -2.958 | 0.996  | 1.00 | 0.00 | O |
| ATOM   | 41    | O5'     | DA  | A     | 3                | 3.642  | -1.431 | -0.876 | 1.00 | 0.00 | O |
| ATOM   | 42    | C5'     | DA  | A     | 3                | 3.796  | -0.963 | -2.208 | 1.00 | 0.00 | C |
| ATOM   | 43    | C4'     | DA  | A     | 3                | 4.837  | 0.141  | -2.235 | 1.00 | 0.00 | C |
| ATOM   | 44    | O4'     | DA  | A     | 3                | 4.382  | 1.297  | -1.525 | 1.00 | 0.00 | O |
| ATOM   | 45    | C3'     | DA  | A     | 3                | 6.156  | -0.247 | -1.566 | 1.00 | 0.00 | C |
| ATOM   | 46    | O3'     | DA  | A     | 3                | 7.170  | 0.516  | -2.198 | 1.00 | 0.00 | O |
| ATOM   | 47    | C2'     | DA  | A     | 3                | 5.945  | 0.190  | -0.114 | 1.00 | 0.00 | C |
| ATOM   | 48    | C1'     | DA  | A     | 3                | 4.985  | 1.379  | -0.250 | 1.00 | 0.00 | C |
| ATOM   | 49    | N9      | DA  | A     | 3                | 3.958  | 1.431  | 0.785  | 1.00 | 0.00 | N |
| ATOM   | 50    | C8      | DA  | A     | 3                | 3.317  | 0.406  | 1.444  | 1.00 | 0.00 | C |
| ATOM   | 51    | N7      | DA  | A     | 3                | 2.340  | 0.808  | 2.222  | 1.00 | 0.00 | N |
| ATOM   | 52    | C5      | DA  | A     | 3                | 2.332  | 2.181  | 2.065  | 1.00 | 0.00 | C |
| ATOM   | 53    | C6      | DA  | A     | 3                | 1.550  | 3.210  | 2.631  | 1.00 | 0.00 | C |
| ATOM   | 54    | N6      | DA  | A     | 3                | 0.528  | 2.957  | 3.474  | 1.00 | 0.00 | N |
| ATOM   | 55    | N1      | DA  | A     | 3                | 1.795  | 4.479  | 2.267  | 1.00 | 0.00 | N |
| ATOM   | 56    | C2      | DA  | A     | 3                | 2.774  | 4.712  | 1.381  | 1.00 | 0.00 | C |
| ATOM   | 57    | N3      | DA  | A     | 3                | 3.583  | 3.841  | 0.783  | 1.00 | 0.00 | N |
| ATOM   | 58    | C4      | DA  | A     | 3                | 3.322  | 2.586  | 1.172  | 1.00 | 0.00 | C |
| END    |       |         |     |       |                  |        |        |        |      |      |   |
| COMPND | ACC / | D-B3LYP | / H | MODEL | / NEUTRAL        |        |        |        |      |      |   |
| ATOM   | 1     | O5'     | DA  | A     | 1                | -6.945 | -1.095 | 0.101  | 1.00 | 0.00 | O |
| ATOM   | 2     | C5'     | DA  | A     | 1                | -6.699 | -2.134 | -0.844 | 1.00 | 0.00 | C |
| ATOM   | 3     | C4'     | DA  | A     | 1                | -5.200 | -2.316 | -1.042 | 1.00 | 0.00 | C |
| ATOM   | 4     | O4'     | DA  | A     | 1                | -4.620 | -1.144 | -1.642 | 1.00 | 0.00 | O |
| ATOM   | 5     | C3'     | DA  | A     | 1                | -4.415 | -2.534 | 0.257  | 1.00 | 0.00 | C |
| ATOM   | 6     | O3'     | DA  | A     | 1                | -3.215 | -3.281 | -0.114 | 1.00 | 0.00 | O |
| ATOM   | 7     | C2'     | DA  | A     | 1                | -4.058 | -1.117 | 0.663  | 1.00 | 0.00 | C |
| ATOM   | 8     | C1'     | DA  | A     | 1                | -3.786 | -0.466 | -0.696 | 1.00 | 0.00 | C |
| ATOM   | 9     | N9      | DA  | A     | 1                | -4.048 | 0.958  | -0.713 | 1.00 | 0.00 | N |
| ATOM   | 10    | C8      | DA  | A     | 1                | -5.012 | 1.667  | -0.019 | 1.00 | 0.00 | C |
| ATOM   | 11    | N7      | DA  | A     | 1                | -4.897 | 2.970  | -0.140 | 1.00 | 0.00 | N |
| ATOM   | 12    | C5      | DA  | A     | 1                | -3.806 | 3.132  | -0.976 | 1.00 | 0.00 | C |
| ATOM   | 13    | C6      | DA  | A     | 1                | -3.108 | 4.268  | -1.427 | 1.00 | 0.00 | C |
| ATOM   | 14    | N6      | DA  | A     | 1                | -3.398 | 5.516  | -0.962 | 1.00 | 0.00 | N |
| ATOM   | 15    | N1      | DA  | A     | 1                | -2.076 | 4.106  | -2.275 | 1.00 | 0.00 | N |
| ATOM   | 16    | C2      | DA  | A     | 1                | -1.707 | 2.854  | -2.591 | 1.00 | 0.00 | C |
| ATOM   | 17    | N3      | DA  | A     | 1                | -2.230 | 1.697  | -2.171 | 1.00 | 0.00 | N |
| ATOM   | 18    | C4      | DA  | A     | 1                | -3.275 | 1.899  | -1.360 | 1.00 | 0.00 | C |
| ATOM   | 19    | P       | DC  | A     | 2                | -2.125 | -3.735 | 0.975  | 1.00 | 0.00 | P |
| ATOM   | 20    | OP1     | DC  | A     | 2                | -2.664 | -5.092 | 1.645  | 1.00 | 0.00 | O |
| ATOM   | 21    | OP2     | DC  | A     | 2                | -1.781 | -2.757 | 2.038  | 1.00 | 0.00 | O |
| ATOM   | 22    | O5'     | DC  | A     | 2                | -0.940 | -4.256 | 0.037  | 1.00 | 0.00 | O |
| ATOM   | 23    | C5'     | DC  | A     | 2                | -0.570 | -3.698 | -1.249 | 1.00 | 0.00 | C |
| ATOM   | 24    | C4'     | DC  | A     | 2                | 0.375  | -2.518 | -1.133 | 1.00 | 0.00 | C |
| ATOM   | 25    | O4'     | DC  | A     | 2                | -0.350 | -1.328 | -0.803 | 1.00 | 0.00 | O |
| ATOM   | 26    | C3'     | DC  | A     | 2                | 1.477  | -2.671 | -0.047 | 1.00 | 0.00 | C |
| ATOM   | 27    | O3'     | DC  | A     | 2                | 2.743  | -2.417 | -0.718 | 1.00 | 0.00 | O |
| ATOM   | 28    | C2'     | DC  | A     | 2                | 1.144  | -1.561 | 0.946  | 1.00 | 0.00 | C |
| ATOM   | 29    | C1'     | DC  | A     | 2                | 0.550  | -0.526 | -0.008 | 1.00 | 0.00 | C |
| ATOM   | 30    | N1      | DC  | A     | 2                | -0.173 | 0.592  | 0.548  | 1.00 | 0.00 | N |
| ATOM   | 31    | C2      | DC  | A     | 2                | 0.023  | 1.893  | -0.034 | 1.00 | 0.00 | C |
| ATOM   | 32    | O2      | DC  | A     | 2                | 0.863  | 2.033  | -0.921 | 1.00 | 0.00 | O |
| ATOM   | 33    | N3      | DC  | A     | 2                | -0.741 | 2.915  | 0.439  | 1.00 | 0.00 | N |
| ATOM   | 34    | C4      | DC  | A     | 2                | -1.642 | 2.708  | 1.387  | 1.00 | 0.00 | C |
| ATOM   | 35    | N4      | DC  | A     | 2                | -2.357 | 3.780  | 1.816  | 1.00 | 0.00 | N |
| ATOM   | 36    | C5      | DC  | A     | 2                | -1.856 | 1.425  | 1.995  | 1.00 | 0.00 | C |
| ATOM   | 37    | C6      | DC  | A     | 2                | -1.098 | 0.398  | 1.533  | 1.00 | 0.00 | C |
| ATOM   | 38    | P       | DC  | A     | 3                | 4.146  | -2.641 | 0.033  | 1.00 | 0.00 | P |
| ATOM   | 39    | OP1     | DC  | A     | 3                | 4.298  | -4.225 | 0.263  | 1.00 | 0.00 | O |
| ATOM   | 40    | OP2     | DC  | A     | 3                | 4.348  | -1.932 | 1.322  | 1.00 | 0.00 | O |
| ATOM   | 41    | O5'     | DC  | A     | 3                | 5.185  | -2.341 | -1.142 | 1.00 | 0.00 | O |
| ATOM   | 42    | C5'     | DC  | A     | 3                | 4.970  | -1.402 | -2.229 | 1.00 | 0.00 | C |
| ATOM   | 43    | C4'     | DC  | A     | 3                | 5.214  | 0.036  | -1.828 | 1.00 | 0.00 | C |
| ATOM   | 44    | O4'     | DC  | A     | 3                | 4.131  | 0.514  | -1.020 | 1.00 | 0.00 | O |
| ATOM   | 45    | C3'     | DC  | A     | 3                | 6.523  | 0.296  | -1.029 | 1.00 | 0.00 | C |
| ATOM   | 46    | O3'     | DC  | A     | 3                | 7.294  | 1.220  | -1.795 | 1.00 | 0.00 | O |
| ATOM   | 47    | C2'     | DC  | A     | 3                | 6.008  | 0.906  | 0.283  | 1.00 | 0.00 | C |
| ATOM   | 48    | C1'     | DC  | A     | 3                | 4.703  | 1.544  | -0.194 | 1.00 | 0.00 | C |
| ATOM   | 49    | N1      | DC  | A     | 3                | 3.748  | 1.946  | 0.815  | 1.00 | 0.00 | N |
| ATOM   | 50    | C2      | DC  | A     | 3                | 3.200  | 3.270  | 0.773  | 1.00 | 0.00 | C |
| ATOM   | 51    | O2      | DC  | A     | 3                | 3.631  | 4.076  | -0.054 | 1.00 | 0.00 | O |
| ATOM   | 52    | N3      | DC  | A     | 3                | 2.227  | 3.583  | 1.677  | 1.00 | 0.00 | N |
| ATOM   | 53    | C4      | DC  | A     | 3                | 1.794  | 2.675  | 2.542  | 1.00 | 0.00 | C |
| ATOM   | 54    | N4      | DC  | A     | 3                | 0.799  | 3.037  | 3.391  | 1.00 | 0.00 | N |
| ATOM   | 55    | C5      | DC  | A     | 3                | 2.347  | 1.355  | 2.632  | 1.00 | 0.00 | C |
| ATOM   | 56    | C6      | DC  | A     | 3                | 3.316  | 1.037  | 1.736  | 1.00 | 0.00 | C |
| END    |       |         |     |       |                  |        |        |        |      |      |   |
| COMPND | ACC / | D-B3LYP | / H | MODEL | / SINGLY IONIZED |        |        |        |      |      |   |
| ATOM   | 1     | O5'     | DA  | A     | 1                | -6.571 | -0.378 | 0.321  | 1.00 | 0.00 | O |
| ATOM   | 2     | C5'     | DA  | A     | 1                | -6.680 | -1.456 | -0.609 | 1.00 | 0.00 | C |
| ATOM   | 3     | C4'     | DA  | A     | 1                | -5.288 | -1.904 | -1.030 | 1.00 | 0.00 | C |
| ATOM   | 4     | O4'     | DA  | A     | 1                | -4.649 | -0.877 | -1.821 | 1.00 | 0.00 | O |
| ATOM   | 5     | C3'     | DA  | A     | 1                | -4.346 | -2.169 | 0.152  | 1.00 | 0.00 | C |
| ATOM   | 6     | O3'     | DA  | A     | 1                | -3.398 | -3.197 | -0.262 | 1.00 | 0.00 | O |
| ATOM   | 7     | C2'     | DA  | A     | 1                | -3.637 | -0.839 | 0.324  | 1.00 | 0.00 | C |
| ATOM   | 8     | C1'     | DA  | A     | 1                | -3.563 | -0.313 | -1.111 | 1.00 | 0.00 | C |
| ATOM   | 9     | N9      | DA  | A     | 1                | -3.631 | 1.152  | -1.149 | 1.00 | 0.00 | N |
| ATOM   | 10    | C8      | DA  | A     | 1                | -4.548 | 1.958  | -0.548 | 1.00 | 0.00 | C |
| ATOM   | 11    | N7      | DA  | A     | 1                | -4.256 | 3.266  | -0.626 | 1.00 | 0.00 | N |
| ATOM   | 12    | C5      | DA  | A     | 1                | -3.093 | 3.297  | -1.303 | 1.00 | 0.00 | C |
| ATOM   | 13    | C6      | DA  | A     | 1                | -2.234 | 4.366  | -1.719 | 1.00 | 0.00 | C |
| ATOM   | 14    | N6      | DA  | A     | 1                | -2.511 | 5.630  | -1.438 | 1.00 | 0.00 | N |
| ATOM   | 15    | N1      | DA  | A     | 1                | -1.115 | 4.070  | -2.424 | 1.00 | 0.00 | N |
| ATOM   | 16    | C2      | DA  | A     | 1                | -0.861 | 2.800  | -2.694 | 1.00 | 0.00 | C |
| ATOM   | 17    | N3      | DA  | A     | 1                | -1.604 | 1.688  | -2.382 | 1.00 | 0.00 | N |
| ATOM   | 18    | C4      | DA  | A     | 1                | -2.666 | 1.990  | -1.679 | 1.00 | 0.00 | C |
| ATOM   | 19    | P       | DC  | A     | 2                | -2.333 | -3.788 | 0.795  | 1.00 | 0.00 | P |
| ATOM   | 20    | OP1     | DC  | A     | 2                | -2.924 | -5.178 | 1.335  | 1.00 | 0.00 | O |
| ATOM   | 21    | OP2     | DC  | A     | 2                | -1.986 | -2.902 | 1.934  | 1.00 | 0.00 | O |
| ATOM   | 22    | O5'     | DC  | A     | 2                | -1.149 | -4.277 | -0.166 | 1.00 | 0.00 | O |
| ATOM   | 23    | C5'     | DC  | A     | 2                | -0.731 | -3.609 | -1.381 | 1.00 | 0.00 | C |
| ATOM   | 24    | C4'     | DC  | A     | 2                | 0.249  | -2.481 | -1.132 | 1.00 | 0.00 | C |
| ATOM   | 25    | O4'     | DC  | A     | 2                | -0.438 | -1.320 | -0.647 | 1.00 | 0.00 | O |
| ATOM   | 26    | C3'     | DC  | A     | 2                | 1.361  | -2.790 | -0.091 | 1.00 | 0.00 | C |
| ATOM   | 27    | O3'     | DC  | A     | 2                | 2.612  | -2.476 | -0.756 | 1.00 | 0.00 | O |
| ATOM   | 28    | C2'     | DC  | A     | 2                | 1.063  | -1.811 | 1.045  | 1.00 | 0.00 | C |



|      |    |     |    |   |   |        |        |        |      |      |   |
|------|----|-----|----|---|---|--------|--------|--------|------|------|---|
| ATOM | 29 | C1' | DC | A | 2 | 0.489  | -0.652 | 0.235  | 1.00 | 0.00 | C |
| ATOM | 30 | N1  | DC | A | 2 | -0.219 | 0.407  | 0.925  | 1.00 | 0.00 | N |
| ATOM | 31 | C2  | DC | A | 2 | -0.206 | 1.707  | 0.331  | 1.00 | 0.00 | C |
| ATOM | 32 | O2  | DC | A | 2 | 0.567  | 1.930  | -0.606 | 1.00 | 0.00 | O |
| ATOM | 33 | N3  | DC | A | 2 | -1.076 | 2.642  | 0.798  | 1.00 | 0.00 | N |
| ATOM | 34 | C4  | DC | A | 2 | -1.851 | 2.371  | 1.855  | 1.00 | 0.00 | C |
| ATOM | 35 | N4  | DC | A | 2 | -2.718 | 3.317  | 2.244  | 1.00 | 0.00 | N |
| ATOM | 36 | C5  | DC | A | 2 | -1.779 | 1.127  | 2.560  | 1.00 | 0.00 | C |
| ATOM | 37 | C6  | DC | A | 2 | -0.979 | 0.165  | 2.033  | 1.00 | 0.00 | C |
| ATOM | 38 | P   | DC | A | 3 | 4.051  | -2.696 | -0.078 | 1.00 | 0.00 | P |
| ATOM | 39 | OP1 | DC | A | 3 | 4.272  | -4.284 | 0.040  | 1.00 | 0.00 | O |
| ATOM | 40 | OP2 | DC | A | 3 | 4.283  | -2.065 | 1.246  | 1.00 | 0.00 | O |
| ATOM | 41 | O5' | DC | A | 3 | 5.020  | -2.269 | -1.273 | 1.00 | 0.00 | O |
| ATOM | 42 | C5' | DC | A | 3 | 4.685  | -1.320 | -2.319 | 1.00 | 0.00 | C |
| ATOM | 43 | C4' | DC | A | 3 | 4.851  | 0.118  | -1.880 | 1.00 | 0.00 | C |
| ATOM | 44 | O4' | DC | A | 3 | 3.800  | 0.487  | -0.975 | 1.00 | 0.00 | O |
| ATOM | 45 | C3' | DC | A | 3 | 6.195  | 0.438  | -1.167 | 1.00 | 0.00 | C |
| ATOM | 46 | O3' | DC | A | 3 | 6.832  | 1.460  | -1.931 | 1.00 | 0.00 | O |
| ATOM | 47 | C2' | DC | A | 3 | 5.739  | 0.935  | 0.212  | 1.00 | 0.00 | C |
| ATOM | 48 | C1' | DC | A | 3 | 4.367  | 1.510  | -0.138 | 1.00 | 0.00 | C |
| ATOM | 49 | N1  | DC | A | 3 | 3.471  | 1.801  | 0.959  | 1.00 | 0.00 | N |
| ATOM | 50 | C2  | DC | A | 3 | 2.878  | 3.105  | 1.049  | 1.00 | 0.00 | C |
| ATOM | 51 | O2  | DC | A | 3 | 3.185  | 3.968  | 0.225  | 1.00 | 0.00 | O |
| ATOM | 52 | N3  | DC | A | 3 | 2.005  | 3.331  | 2.073  | 1.00 | 0.00 | N |
| ATOM | 53 | C4  | DC | A | 3 | 1.722  | 2.370  | 2.944  | 1.00 | 0.00 | C |
| ATOM | 54 | N4  | DC | A | 3 | 0.847  | 2.660  | 3.932  | 1.00 | 0.00 | N |
| ATOM | 55 | C5  | DC | A | 3 | 2.307  | 1.061  | 2.885  | 1.00 | 0.00 | C |
| ATOM | 56 | C6  | DC | A | 3 | 3.175  | 0.827  | 1.868  | 1.00 | 0.00 | C |
| END  |    |     |    |   |   |        |        |        |      |      |   |

| COMPND | AAC | /   | D-B3LYP | / | H MODEL | /      | NEUTRAL |        |      |      |   |
|--------|-----|-----|---------|---|---------|--------|---------|--------|------|------|---|
| ATOM   | 1   | O5' | DA      | A | 1       | 0.000  | 0.000   | 0.000  | 1.00 | 0.00 | O |
| ATOM   | 2   | C5' | DA      | A | 1       | 0.000  | 0.000   | 1.426  | 1.00 | 0.00 | C |
| ATOM   | 3   | C4' | DA      | A | 1       | 1.435  | 0.000   | 1.936  | 1.00 | 0.00 | C |
| ATOM   | 4   | O4' | DA      | A | 1       | 2.072  | -1.260  | 1.660  | 1.00 | 0.00 | O |
| ATOM   | 5   | C3' | DA      | A | 1       | 2.312  | 1.071   | 1.276  | 1.00 | 0.00 | C |
| ATOM   | 6   | O3' | DA      | A | 1       | 3.319  | 1.469   | 2.260  | 1.00 | 0.00 | O |
| ATOM   | 7   | C2' | DA      | A | 1       | 2.961  | 0.320   | 0.128  | 1.00 | 0.00 | C |
| ATOM   | 8   | C1' | DA      | A | 1       | 3.105  | -1.097  | 0.687  | 1.00 | 0.00 | C |
| ATOM   | 9   | N9  | DA      | A | 1       | 2.999  | -2.118  | -0.337 | 1.00 | 0.00 | N |
| ATOM   | 10  | C8  | DA      | A | 1       | 2.041  | -2.225  | -1.328 | 1.00 | 0.00 | C |
| ATOM   | 11  | N7  | DA      | A | 1       | 2.246  | -3.229  | -2.151 | 1.00 | 0.00 | N |
| ATOM   | 12  | C5  | DA      | A | 1       | 3.402  | -3.823  | -1.672 | 1.00 | 0.00 | C |
| ATOM   | 13  | C6  | DA      | A | 1       | 4.174  | -4.911  | -2.124 | 1.00 | 0.00 | C |
| ATOM   | 14  | N6  | DA      | A | 1       | 3.833  | -5.633  | -3.221 | 1.00 | 0.00 | N |
| ATOM   | 15  | N1  | DA      | A | 1       | 5.280  | -5.254  | -1.432 | 1.00 | 0.00 | N |
| ATOM   | 16  | C2  | DA      | A | 1       | 5.599  | -4.531  | -0.343 | 1.00 | 0.00 | C |
| ATOM   | 17  | N3  | DA      | A | 1       | 4.969  | -3.474  | 0.175  | 1.00 | 0.00 | N |
| ATOM   | 18  | C4  | DA      | A | 1       | 3.880  | -3.158  | -0.539 | 1.00 | 0.00 | C |
| ATOM   | 19  | P   | DA      | A | 2       | 4.296  | 2.709   | 1.956  | 1.00 | 0.00 | P |
| ATOM   | 20  | OP1 | DA      | A | 2       | 3.732  | 3.967   | 2.780  | 1.00 | 0.00 | O |
| ATOM   | 21  | OP2 | DA      | A | 2       | 4.462  | 3.072   | 0.527  | 1.00 | 0.00 | O |
| ATOM   | 22  | O5' | DA      | A | 2       | 5.612  | 2.329   | 2.789  | 1.00 | 0.00 | O |
| ATOM   | 23  | C5' | DA      | A | 2       | 6.084  | 0.985   | 3.047  | 1.00 | 0.00 | C |
| ATOM   | 24  | C4' | DA      | A | 2       | 6.957  | 0.447   | 1.931  | 1.00 | 0.00 | C |
| ATOM   | 25  | O4' | DA      | A | 2       | 6.140  | 0.078   | 0.811  | 1.00 | 0.00 | O |
| ATOM   | 26  | C3' | DA      | A | 2       | 8.014  | 1.444   | 1.387  | 1.00 | 0.00 | C |
| ATOM   | 27  | O3' | DA      | A | 2       | 9.260  | 0.702   | 1.334  | 1.00 | 0.00 | O |
| ATOM   | 28  | C2' | DA      | A | 2       | 7.503  | 1.758   | -0.016 | 1.00 | 0.00 | C |
| ATOM   | 29  | C1' | DA      | A | 2       | 6.884  | 0.411   | -0.375 | 1.00 | 0.00 | C |
| ATOM   | 30  | N9  | DA      | A | 2       | 6.015  | 0.395   | -1.515 | 1.00 | 0.00 | N |
| ATOM   | 31  | OP1 | DA      | A | 2       | 5.246  | 1.419   | -2.042 | 1.00 | 0.00 | O |
| ATOM   | 32  | N7  | DA      | A | 2       | 4.587  | 1.073   | -3.123 | 1.00 | 0.00 | N |
| ATOM   | 33  | C5  | DA      | A | 2       | 4.942  | -0.252  | -3.326 | 1.00 | 0.00 | C |
| ATOM   | 34  | C6  | DA      | A | 2       | 4.664  | -1.166  | -4.361 | 1.00 | 0.00 | C |
| ATOM   | 35  | N6  | DA      | A | 2       | 3.935  | -0.810  | -5.452 | 1.00 | 0.00 | N |
| ATOM   | 36  | N1  | DA      | A | 2       | 5.201  | -2.397  | -4.303 | 1.00 | 0.00 | N |
| ATOM   | 37  | C2  | DA      | A | 2       | 6.041  | -2.677  | -3.292 | 1.00 | 0.00 | C |
| ATOM   | 38  | N3  | DA      | A | 2       | 6.423  | -1.890  | -2.282 | 1.00 | 0.00 | N |
| ATOM   | 39  | C4  | DA      | A | 2       | 5.833  | -0.691  | -2.348 | 1.00 | 0.00 | C |
| ATOM   | 40  | P   | DC      | A | 3       | 10.644 | 1.342   | 0.843  | 1.00 | 0.00 | P |
| ATOM   | 41  | OP1 | DC      | A | 3       | 11.057 | 2.350   | 2.029  | 1.00 | 0.00 | O |
| ATOM   | 42  | OP2 | DC      | A | 3       | 10.671 | 1.990   | -0.497 | 1.00 | 0.00 | O |
| ATOM   | 43  | O5' | DC      | A | 3       | 11.641 | 0.119   | 1.073  | 1.00 | 0.00 | O |
| ATOM   | 44  | C5' | DC      | A | 3       | 11.269 | -1.282  | 0.994  | 1.00 | 0.00 | C |
| ATOM   | 45  | C4' | DC      | A | 3       | 11.238 | -1.803  | -0.426 | 1.00 | 0.00 | C |
| ATOM   | 46  | O4' | DC      | A | 3       | 10.082 | -1.310  | -1.121 | 1.00 | 0.00 | O |
| ATOM   | 47  | C3' | DC      | A | 3       | 12.478 | -1.431  | -1.289 | 1.00 | 0.00 | C |
| ATOM   | 48  | O3' | DC      | A | 3       | 13.064 | -2.660  | -1.714 | 1.00 | 0.00 | O |
| ATOM   | 49  | C2' | DC      | A | 3       | 11.859 | -0.645  | -2.452 | 1.00 | 0.00 | C |
| ATOM   | 50  | C1' | DC      | A | 3       | 10.469 | -1.275  | -2.506 | 1.00 | 0.00 | C |
| ATOM   | 51  | N1  | DC      | A | 3       | 9.465  | -0.582  | -3.285 | 1.00 | 0.00 | N |
| ATOM   | 52  | C2  | DC      | A | 3       | 8.801  | -1.280  | -4.346 | 1.00 | 0.00 | C |
| ATOM   | 53  | O2  | DC      | A | 3       | 9.100  | -2.453  | -4.580 | 1.00 | 0.00 | O |
| ATOM   | 54  | N3  | DC      | A | 3       | 7.861  | -0.598  | -5.059 | 1.00 | 0.00 | N |
| ATOM   | 55  | C4  | DC      | A | 3       | 7.559  | 0.658   | -4.754 | 1.00 | 0.00 | C |
| ATOM   | 56  | N4  | DC      | A | 3       | 6.602  | 1.273   | -5.500 | 1.00 | 0.00 | N |
| ATOM   | 57  | C5  | DC      | A | 3       | 8.211  | 1.384   | -3.703 | 1.00 | 0.00 | C |
| ATOM   | 58  | C6  | DC      | A | 3       | 9.160  | 0.718   | -2.996 | 1.00 | 0.00 | C |
| END    |     |     |         |   |         |        |         |        |      |      |   |

| COMPND | AAC | /   | D-B3LYP | / | H MODEL | /      | SINGLY IONIZED |        |      |      |   |
|--------|-----|-----|---------|---|---------|--------|----------------|--------|------|------|---|
| ATOM   | 1   | O5' | DA      | A | 1       | -6.362 | -1.479         | -0.024 | 1.00 | 0.00 | O |
| ATOM   | 2   | C5' | DA      | A | 1       | -6.067 | -2.473         | -1.001 | 1.00 | 0.00 | C |
| ATOM   | 3   | C4' | DA      | A | 1       | -4.559 | -2.646         | -1.129 | 1.00 | 0.00 | C |
| ATOM   | 4   | O4' | DA      | A | 1       | -3.935 | -1.434         | -1.589 | 1.00 | 0.00 | O |
| ATOM   | 5   | C3' | DA      | A | 1       | -3.833 | -2.975         | 0.177  | 1.00 | 0.00 | C |
| ATOM   | 6   | O3' | DA      | A | 1       | -2.589 | -3.629         | -0.219 | 1.00 | 0.00 | O |
| ATOM   | 7   | C2' | DA      | A | 1       | -3.559 | -1.595         | 0.756  | 1.00 | 0.00 | C |
| ATOM   | 8   | C1' | DA      | A | 1       | -3.274 | -0.779         | -0.510 | 1.00 | 0.00 | C |
| ATOM   | 9   | N9  | DA      | A | 1       | -3.722 | 0.610          | -0.439 | 1.00 | 0.00 | N |
| ATOM   | 10  | C8  | DA      | A | 1       | -4.718 | 1.187          | 0.304  | 1.00 | 0.00 | C |
| ATOM   | 11  | N7  | DA      | A | 1       | -4.931 | 2.466          | 0.015  | 1.00 | 0.00 | N |
| ATOM   | 12  | C5  | DA      | A | 1       | -4.047 | 2.730          | -0.990 | 1.00 | 0.00 | C |
| ATOM   | 13  | C6  | DA      | A | 1       | -3.783 | 3.897          | -1.758 | 1.00 | 0.00 | C |
| ATOM   | 14  | N6  | DA      | A | 1       | -4.424 | 5.047          | -1.539 | 1.00 | 0.00 | N |
| ATOM   | 15  | N1  | DA      | A | 1       | -2.855 | 3.827          | -2.741 | 1.00 | 0.00 | N |
| ATOM   | 16  | C2  | DA      | A | 1       | -2.210 | 2.674          | -2.922 | 1.00 | 0.00 | C |
| ATOM   | 17  | N3  | DA      | A | 1       | -2.355 | 1.504          | -2.255 | 1.00 | 0.00 | N |
| ATOM   | 18  | C4  | DA      | A | 1       | -3.279 | 1.596          | -1.307 | 1.00 | 0.00 | C |
| ATOM   | 19  | P   | DA      | A | 2       | -1.501 | -4.152         | 0.837  | 1.00 | 0.00 | P |
| ATOM   | 20  | OP1 | DA      | A | 2       | -2.009 | -5.574         | 1.381  | 1.00 | 0.00 | O |
| ATOM   | 21  | OP2 | DA      | A | 2       | -1.193 | -3.264         | 1.987  | 1.00 | 0.00 | O |
| ATOM   | 22  | O5' | DA      | A | 2       | -0.276 | -4.535         | -0.118 | 1.00 | 0.00 | O |
| ATOM   | 23  | C5' | DA      | A | 2       | 0.008  | -3.960         | -1.417 | 1.00 | 0.00 | C |
| ATOM   | 24  | C4' | DA      | A | 2       | 0.861  | -2.710         | -1.326 | 1.00 | 0.00 | C |
| ATOM   | 25  | O4' | DA      | A | 2       | 0.058  | -1.604         | -0.873 | 1.00 | 0.00 | O |
| ATOM   | 26  | C3' | DA      | A | 2       | 2.056  | -2.803         | -0.341 | 1.00 | 0.00 | C |

|      |    |     |    |   |   |        |        |        |      |      |   |
|------|----|-----|----|---|---|--------|--------|--------|------|------|---|
| ATOM | 27 | O3' | DA | A | 2 | 3.190  | -2.244 | -1.056 | 1.00 | 0.00 | O |
| ATOM | 28 | C2' | DA | A | 2 | 1.628  | -1.898 | 0.809  | 1.00 | 0.00 | C |
| ATOM | 29 | C1' | DA | A | 2 | 0.870  | -0.835 | 0.024  | 1.00 | 0.00 | C |
| ATOM | 30 | N9  | DA | A | 2 | 0.006  | 0.037  | 0.782  | 1.00 | 0.00 | N |
| ATOM | 31 | C8  | DA | A | 2 | -0.730 | -0.243 | 1.903  | 1.00 | 0.00 | C |
| ATOM | 32 | N7  | DA | A | 2 | -1.526 | 0.752  | 2.281  | 1.00 | 0.00 | N |
| ATOM | 33 | C5  | DA | A | 2 | -1.290 | 1.728  | 1.365  | 1.00 | 0.00 | C |
| ATOM | 34 | C6  | DA | A | 2 | -1.812 | 3.042  | 1.197  | 1.00 | 0.00 | C |
| ATOM | 35 | N6  | DA | A | 2 | -2.753 | 3.527  | 1.999  | 1.00 | 0.00 | N |
| ATOM | 36 | N1  | DA | A | 2 | -1.346 | 3.804  | 0.176  | 1.00 | 0.00 | N |
| ATOM | 37 | C2  | DA | A | 2 | -0.423 | 3.287  | -0.627 | 1.00 | 0.00 | C |
| ATOM | 38 | N3  | DA | A | 2 | 0.123  | 2.041  | -0.599 | 1.00 | 0.00 | N |
| ATOM | 39 | C4  | DA | A | 2 | -0.338 | 1.324  | 0.407  | 1.00 | 0.00 | C |
| ATOM | 40 | P   | DC | A | 3 | 4.668  | -2.095 | -0.445 | 1.00 | 0.00 | P |
| ATOM | 41 | OP1 | DC | A | 3 | 5.345  | -3.551 | -0.496 | 1.00 | 0.00 | O |
| ATOM | 42 | OP2 | DC | A | 3 | 4.789  | -1.542 | 0.927  | 1.00 | 0.00 | O |
| ATOM | 43 | O5' | DC | A | 3 | 5.403  | -1.309 | -1.627 | 1.00 | 0.00 | O |
| ATOM | 44 | C5' | DC | A | 3 | 4.754  | -0.372 | -2.526 | 1.00 | 0.00 | C |
| ATOM | 45 | C4' | DC | A | 3 | 4.584  | 1.004  | -1.922 | 1.00 | 0.00 | C |
| ATOM | 46 | O4' | DC | A | 3 | 3.570  | 0.984  | -0.906 | 1.00 | 0.00 | O |
| ATOM | 47 | C3' | DC | A | 3 | 5.860  | 1.607  | -1.270 | 1.00 | 0.00 | C |
| ATOM | 48 | O3' | DC | A | 3 | 6.140  | 2.819  | -1.966 | 1.00 | 0.00 | O |
| ATOM | 49 | C2' | DC | A | 3 | 5.423  | 1.851  | 0.183  | 1.00 | 0.00 | C |
| ATOM | 50 | C1' | DC | A | 3 | 3.920  | 2.048  | -0.005 | 1.00 | 0.00 | C |
| ATOM | 51 | N1  | DC | A | 3 | 3.086  | 1.981  | 1.178  | 1.00 | 0.00 | N |
| ATOM | 52 | C2  | DC | A | 3 | 2.146  | 3.031  | 1.429  | 1.00 | 0.00 | C |
| ATOM | 53 | O2  | DC | A | 3 | 2.099  | 3.998  | 0.663  | 1.00 | 0.00 | O |
| ATOM | 54 | N3  | DC | A | 3 | 1.321  | 2.905  | 2.506  | 1.00 | 0.00 | N |
| ATOM | 55 | C4  | DC | A | 3 | 1.433  | 1.858  | 3.325  | 1.00 | 0.00 | C |
| ATOM | 56 | N4  | DC | A | 3 | 0.604  | 1.808  | 4.384  | 1.00 | 0.00 | N |
| ATOM | 57 | C5  | DC | A | 3 | 2.386  | 0.808  | 3.116  | 1.00 | 0.00 | C |
| ATOM | 58 | C6  | DC | A | 3 | 3.184  | 0.912  | 2.023  | 1.00 | 0.00 | C |
| END  |    |     |    |   |   |        |        |        |      |      |   |

| COMPND | CCA / | D-B3LYP / | H MODEL / | NEUTRAL |   |        |        |        |      |      |   |
|--------|-------|-----------|-----------|---------|---|--------|--------|--------|------|------|---|
| ATOM   | 1     | O5'       | DC        | A       | 1 | -6.945 | -1.204 | 0.390  | 1.00 | 0.00 | O |
| ATOM   | 2     | C5'       | DC        | A       | 1 | -6.738 | -2.253 | -0.555 | 1.00 | 0.00 | C |
| ATOM   | 3     | C4'       | DC        | A       | 1 | -5.255 | -2.356 | -0.884 | 1.00 | 0.00 | C |
| ATOM   | 4     | O4'       | DC        | A       | 1 | -4.829 | -1.211 | -1.639 | 1.00 | 0.00 | O |
| ATOM   | 5     | C3'       | DC        | A       | 1 | -4.356 | -2.400 | 0.360  | 1.00 | 0.00 | C |
| ATOM   | 6     | O3'       | DC        | A       | 1 | -3.188 | -3.207 | 0.012  | 1.00 | 0.00 | O |
| ATOM   | 7     | C2'       | DC        | A       | 1 | -3.962 | -0.946 | 0.547  | 1.00 | 0.00 | C |
| ATOM   | 8     | C1'       | DC        | A       | 1 | -3.857 | -0.457 | -0.901 | 1.00 | 0.00 | C |
| ATOM   | 9     | N1        | DC        | A       | 1 | -4.113 | 0.967  | -1.076 | 1.00 | 0.00 | N |
| ATOM   | 10    | C2        | DC        | A       | 1 | -3.258 | 1.734  | -1.931 | 1.00 | 0.00 | C |
| ATOM   | 11    | O2        | DC        | A       | 1 | -2.380 | 1.162  | -2.578 | 1.00 | 0.00 | O |
| ATOM   | 12    | N3        | DC        | A       | 1 | -3.460 | 3.083  | -1.972 | 1.00 | 0.00 | N |
| ATOM   | 13    | C4        | DC        | A       | 1 | -4.469 | 3.631  | -1.312 | 1.00 | 0.00 | C |
| ATOM   | 14    | N4        | DC        | A       | 1 | -4.532 | 4.986  | -1.278 | 1.00 | 0.00 | N |
| ATOM   | 15    | C5        | DC        | A       | 1 | -5.458 | 2.863  | -0.610 | 1.00 | 0.00 | C |
| ATOM   | 16    | C6        | DC        | A       | 1 | -5.233 | 1.528  | -0.526 | 1.00 | 0.00 | C |
| ATOM   | 17    | P         | DC        | A       | 2 | -2.130 | -3.616 | 1.150  | 1.00 | 0.00 | P |
| ATOM   | 18    | OP1       | DC        | A       | 2 | -2.734 | -4.896 | 1.912  | 1.00 | 0.00 | O |
| ATOM   | 19    | OP2       | DC        | A       | 2 | -1.775 | -2.570 | 2.142  | 1.00 | 0.00 | O |
| ATOM   | 20    | O5'       | DC        | A       | 2 | -0.949 | -4.257 | 0.283  | 1.00 | 0.00 | O |
| ATOM   | 21    | C5'       | DC        | A       | 2 | -0.543 | -3.832 | -1.043 | 1.00 | 0.00 | C |
| ATOM   | 22    | C4'       | DC        | A       | 2 | 0.416  | -2.658 | -1.019 | 1.00 | 0.00 | C |
| ATOM   | 23    | O4'       | DC        | A       | 2 | -0.304 | -1.442 | -0.796 | 1.00 | 0.00 | O |
| ATOM   | 24    | C3'       | DC        | A       | 2 | 1.505  | -2.728 | 0.088  | 1.00 | 0.00 | C |
| ATOM   | 25    | O3'       | DC        | A       | 2 | 2.780  | -2.527 | -0.585 | 1.00 | 0.00 | O |
| ATOM   | 26    | C2'       | DC        | A       | 2 | 1.162  | -1.547 | 0.993  | 1.00 | 0.00 | C |
| ATOM   | 27    | C1'       | DC        | A       | 2 | 0.584  | -0.585 | -0.044 | 1.00 | 0.00 | C |
| ATOM   | 28    | N1        | DC        | A       | 2 | -0.153 | 0.571  | 0.404  | 1.00 | 0.00 | N |
| ATOM   | 29    | C2        | DC        | A       | 2 | -0.092 | 1.759  | -0.408 | 1.00 | 0.00 | C |
| ATOM   | 30    | O2        | DC        | A       | 2 | 0.693  | 1.798  | -1.353 | 1.00 | 0.00 | O |
| ATOM   | 31    | N3        | DC        | A       | 2 | -0.913 | 2.794  | -0.076 | 1.00 | 0.00 | N |
| ATOM   | 32    | C4        | DC        | A       | 2 | -1.724 | 2.707  | 0.966  | 1.00 | 0.00 | C |
| ATOM   | 33    | N4        | DC        | A       | 2 | -2.512 | 3.779  | 1.242  | 1.00 | 0.00 | N |
| ATOM   | 34    | C5        | DC        | A       | 2 | -1.770 | 1.561  | 1.827  | 1.00 | 0.00 | C |
| ATOM   | 35    | C6        | DC        | A       | 2 | -0.979 | 0.511  | 1.488  | 1.00 | 0.00 | C |
| ATOM   | 36    | P         | DA        | A       | 3 | 4.173  | -2.694 | 0.197  | 1.00 | 0.00 | P |
| ATOM   | 37    | OP1       | DA        | A       | 3 | 4.320  | -4.258 | 0.544  | 1.00 | 0.00 | O |
| ATOM   | 38    | OP2       | DA        | A       | 3 | 4.362  | -1.894 | 1.433  | 1.00 | 0.00 | O |
| ATOM   | 39    | O5'       | DA        | A       | 3 | 5.230  | -2.476 | -0.982 | 1.00 | 0.00 | O |
| ATOM   | 40    | C5'       | DA        | A       | 3 | 5.014  | -1.669 | -2.168 | 1.00 | 0.00 | C |
| ATOM   | 41    | C4'       | DA        | A       | 3 | 5.243  | -0.193 | -1.924 | 1.00 | 0.00 | C |
| ATOM   | 42    | O4'       | DA        | A       | 3 | 4.151  | 0.347  | -1.164 | 1.00 | 0.00 | O |
| ATOM   | 43    | C3'       | DA        | A       | 3 | 6.545  | 0.157  | -1.152 | 1.00 | 0.00 | C |
| ATOM   | 44    | O3'       | DA        | A       | 3 | 7.263  | 1.086  | -1.962 | 1.00 | 0.00 | O |
| ATOM   | 45    | C2'       | DA        | A       | 3 | 6.017  | 0.799  | 0.138  | 1.00 | 0.00 | C |
| ATOM   | 46    | C1'       | DA        | A       | 3 | 4.706  | 1.399  | -0.362 | 1.00 | 0.00 | C |
| ATOM   | 47    | N9        | DA        | A       | 3 | 3.752  | 1.790  | 0.639  | 1.00 | 0.00 | N |
| ATOM   | 48    | C8        | DA        | A       | 3 | 3.307  | 1.048  | 1.718  | 1.00 | 0.00 | C |
| ATOM   | 49    | N7        | DA        | A       | 3 | 2.344  | 1.631  | 2.394  | 1.00 | 0.00 | N |
| ATOM   | 50    | C5        | DA        | A       | 3 | 2.143  | 2.831  | 1.729  | 1.00 | 0.00 | C |
| ATOM   | 51    | C6        | DA        | A       | 3 | 1.242  | 3.895  | 1.928  | 1.00 | 0.00 | C |
| ATOM   | 52    | N6        | DA        | A       | 3 | 0.335  | 3.898  | 2.945  | 1.00 | 0.00 | N |
| ATOM   | 53    | N1        | DA        | A       | 3 | 1.299  | 4.956  | 1.100  | 1.00 | 0.00 | N |
| ATOM   | 54    | C2        | DA        | A       | 3 | 2.196  | 4.935  | 0.100  | 1.00 | 0.00 | C |
| ATOM   | 55    | N3        | DA        | A       | 3 | 3.080  | 3.981  | -0.215 | 1.00 | 0.00 | N |
| ATOM   | 56    | C4        | DA        | A       | 3 | 3.003  | 2.950  | 0.634  | 1.00 | 0.00 | C |
| END    |       |           |           |         |   |        |        |        |      |      |   |

| COMPND | CCA / | D-B3LYP / | H MODEL / | SINGLY IONIZED |   |        |        |        |      |      |   |
|--------|-------|-----------|-----------|----------------|---|--------|--------|--------|------|------|---|
| ATOM   | 1     | O5'       | DC        | A              | 1 | -6.867 | -1.394 | 0.467  | 1.00 | 0.00 | O |
| ATOM   | 2     | C5'       | DC        | A              | 1 | -6.637 | -2.474 | -0.436 | 1.00 | 0.00 | C |
| ATOM   | 3     | C4'       | DC        | A              | 1 | -5.159 | -2.535 | -0.793 | 1.00 | 0.00 | C |
| ATOM   | 4     | O4'       | DC        | A              | 1 | -4.794 | -1.415 | -1.617 | 1.00 | 0.00 | O |
| ATOM   | 5     | C3'       | DC        | A              | 1 | -4.233 | -2.479 | 0.430  | 1.00 | 0.00 | C |
| ATOM   | 6     | O3'       | DC        | A              | 1 | -3.044 | -3.257 | 0.090  | 1.00 | 0.00 | O |
| ATOM   | 7     | C2'       | DC        | A              | 1 | -3.891 | -1.002 | 0.529  | 1.00 | 0.00 | C |
| ATOM   | 8     | C1'       | DC        | A              | 1 | -3.839 | -0.585 | -0.944 | 1.00 | 0.00 | C |
| ATOM   | 9     | N1        | DC        | A              | 1 | -4.169 | 0.817  | -1.173 | 1.00 | 0.00 | N |
| ATOM   | 10    | C2        | DC        | A              | 1 | -3.320 | 1.620  | -1.999 | 1.00 | 0.00 | C |
| ATOM   | 11    | O2        | DC        | A              | 1 | -2.365 | 1.097  | -2.576 | 1.00 | 0.00 | O |
| ATOM   | 12    | N3        | DC        | A              | 1 | -3.606 | 2.951  | -2.083 | 1.00 | 0.00 | N |
| ATOM   | 13    | C4        | DC        | A              | 1 | -4.679 | 3.447  | -1.482 | 1.00 | 0.00 | C |
| ATOM   | 14    | N4        | DC        | A              | 1 | -4.823 | 4.796  | -1.476 | 1.00 | 0.00 | N |
| ATOM   | 15    | C5        | DC        | A              | 1 | -5.648 | 2.633  | -0.805 | 1.00 | 0.00 | C |
| ATOM   | 16    | C6        | DC        | A              | 1 | -5.342 | 1.318  | -0.678 | 1.00 | 0.00 | C |
| ATOM   | 17    | P         | DC        | A              | 2 | -1.906 | -3.548 | 1.185  | 1.00 | 0.00 | P |
| ATOM   | 18    | OP1       | DC        | A              | 2 | -2.361 | -4.842 | 2.018  | 1.00 | 0.00 | O |
| ATOM   | 19    | OP2       | DC        | A              | 2 | -1.581 | -2.442 | 2.120  | 1.00 | 0.00 | O |
| ATOM   | 20    | O5'       | DC        | A              | 2 | -0.729 | -4.124 | 0.267  | 1.00 | 0.00 | O |
| ATOM   | 21    | C5'       | DC        | A              | 2 | -0.408 | -3.664 | -1.069 | 1.00 | 0.00 | C |
| ATOM   | 22    | C4'       | DC        | A              | 2 | 0.517  | -2.463 | -1.067 | 1.00 | 0.00 | C |
| ATOM   | 23    | O4'       | DC        | A              | 2 | -0.228 | -1.266 | -0.793 | 1.00 | 0.00 | O |
| ATOM   | 24    | C3'       | DC        | A              | 2 | 1.648  | -2.520 | -0.006 | 1.00 | 0.00 | C |

|      |    |     |    |   |   |        |        |        |      |      |   |
|------|----|-----|----|---|---|--------|--------|--------|------|------|---|
| ATOM | 25 | O3' | DC | A | 2 | 2.890  | -2.297 | -0.722 | 1.00 | 0.00 | O |
| ATOM | 26 | C2' | DC | A | 2 | 1.320  | -1.353 | 0.927  | 1.00 | 0.00 | C |
| ATOM | 27 | C1' | DC | A | 2 | 0.661  | -0.403 | -0.070 | 1.00 | 0.00 | C |
| ATOM | 28 | N1  | DC | A | 2 | -0.125 | 0.715  | 0.440  | 1.00 | 0.00 | N |
| ATOM | 29 | C2  | DC | A | 2 | -0.221 | 1.907  | -0.390 | 1.00 | 0.00 | C |
| ATOM | 30 | O2  | DC | A | 2 | 0.584  | 2.045  | -1.306 | 1.00 | 0.00 | O |
| ATOM | 31 | N3  | DC | A | 2 | -1.172 | 2.823  | -0.088 | 1.00 | 0.00 | N |
| ATOM | 32 | C4  | DC | A | 2 | -1.975 | 2.658  | 0.956  | 1.00 | 0.00 | C |
| ATOM | 33 | N4  | DC | A | 2 | -2.916 | 3.587  | 1.187  | 1.00 | 0.00 | N |
| ATOM | 34 | C5  | DC | A | 2 | -1.834 | 1.544  | 1.855  | 1.00 | 0.00 | C |
| ATOM | 35 | C6  | DC | A | 2 | -0.934 | 0.568  | -1.512 | 1.00 | 0.00 | C |
| ATOM | 36 | F   | DA | A | 3 | 4.311  | -2.507 | -0.001 | 1.00 | 0.00 | F |
| ATOM | 37 | OP1 | DA | A | 3 | 4.476  | -4.085 | 0.246  | 1.00 | 0.00 | O |
| ATOM | 38 | OP2 | DA | A | 3 | 4.528  | -1.782 | 1.276  | 1.00 | 0.00 | O |
| ATOM | 39 | O5' | DA | A | 3 | 5.324  | -2.206 | -1.198 | 1.00 | 0.00 | O |
| ATOM | 40 | C5' | DA | A | 3 | 5.050  | -1.337 | -2.327 | 1.00 | 0.00 | C |
| ATOM | 41 | C4' | DA | A | 3 | 5.239  | 0.126  | -1.991 | 1.00 | 0.00 | C |
| ATOM | 42 | O4' | DA | A | 3 | 4.167  | 0.561  | -1.132 | 1.00 | 0.00 | O |
| ATOM | 43 | C3' | DA | A | 3 | 6.565  | 0.472  | -1.261 | 1.00 | 0.00 | C |
| ATOM | 44 | O3' | DA | A | 3 | 7.181  | 1.517  | -2.008 | 1.00 | 0.00 | O |
| ATOM | 45 | C2' | DA | A | 3 | 6.088  | 0.952  | 0.119  | 1.00 | 0.00 | C |
| ATOM | 46 | C1' | DA | A | 3 | 4.732  | 1.537  | -0.256 | 1.00 | 0.00 | C |
| ATOM | 47 | N9  | DA | A | 3 | 3.800  | 1.774  | 0.824  | 1.00 | 0.00 | N |
| ATOM | 48 | C8  | DA | A | 3 | 3.566  | 1.019  | 1.943  | 1.00 | 0.00 | C |
| ATOM | 49 | N7  | DA | A | 3 | 2.533  | 1.439  | 2.668  | 1.00 | 0.00 | N |
| ATOM | 50 | C5  | DA | A | 3 | 2.070  | 2.521  | 1.983  | 1.00 | 0.00 | C |
| ATOM | 51 | C6  | DA | A | 3 | 0.994  | 3.423  | 2.196  | 1.00 | 0.00 | C |
| ATOM | 52 | N6  | DA | A | 3 | 0.120  | 3.261  | 3.192  | 1.00 | 0.00 | N |
| ATOM | 53 | N1  | DA | A | 3 | 0.810  | 4.455  | 1.333  | 1.00 | 0.00 | N |
| ATOM | 54 | C2  | DA | A | 3 | 1.623  | 4.551  | 0.289  | 1.00 | 0.00 | C |
| ATOM | 55 | N3  | DA | A | 3 | 2.664  | 3.742  | -0.045 | 1.00 | 0.00 | N |
| ATOM | 56 | C4  | DA | A | 3 | 2.840  | 2.767  | 0.824  | 1.00 | 0.00 | C |
| END  |    |     |    |   |   |        |        |        |      |      |   |

| COMPND | CAA / | D-B3LYP / | H MODEL / | NEUTRAL |   |        |        |        |      |      |   |
|--------|-------|-----------|-----------|---------|---|--------|--------|--------|------|------|---|
| ATOM   | 1     | O5'       | DC        | A       | 1 | -6.236 | -0.662 | 0.768  | 1.00 | 0.00 | O |
| ATOM   | 2     | C5'       | DC        | A       | 1 | -6.430 | -1.860 | 0.018  | 1.00 | 0.00 | C |
| ATOM   | 3     | C4'       | DC        | A       | 1 | -5.099 | -2.314 | -0.565 | 1.00 | 0.00 | C |
| ATOM   | 4     | O4'       | DC        | A       | 1 | -4.686 | -1.441 | -1.628 | 1.00 | 0.00 | O |
| ATOM   | 5     | C3'       | DC        | A       | 1 | -3.958 | -2.303 | 0.461  | 1.00 | 0.00 | C |
| ATOM   | 6     | O3'       | DC        | A       | 1 | -3.054 | -3.398 | 0.102  | 1.00 | 0.00 | O |
| ATOM   | 7     | C2'       | DC        | A       | 1 | -3.283 | -0.963 | 0.223  | 1.00 | 0.00 | C |
| ATOM   | 8     | C1'       | DC        | A       | 1 | -3.473 | -0.756 | -1.282 | 1.00 | 0.00 | C |
| ATOM   | 9     | N1        | DC        | A       | 1 | -3.586 | 0.640  | -1.691 | 1.00 | 0.00 | N |
| ATOM   | 10    | C2        | DC        | A       | 1 | -2.790 | 1.130  | -2.772 | 1.00 | 0.00 | C |
| ATOM   | 11    | O2        | DC        | A       | 1 | -2.000 | 0.371  | -3.339 | 1.00 | 0.00 | O |
| ATOM   | 12    | N3        | DC        | A       | 1 | -2.939 | 2.441  | -3.122 | 1.00 | 0.00 | N |
| ATOM   | 13    | C4        | DC        | A       | 1 | -3.842 | 3.203  | -2.512 | 1.00 | 0.00 | C |
| ATOM   | 14    | N4        | DC        | A       | 1 | -3.932 | 4.494  | -2.896 | 1.00 | 0.00 | N |
| ATOM   | 15    | C5        | DC        | A       | 1 | -4.729 | 2.708  | -1.499 | 1.00 | 0.00 | C |
| ATOM   | 16    | C6        | DC        | A       | 1 | -4.562 | 1.416  | -1.127 | 1.00 | 0.00 | C |
| ATOM   | 17    | F         | DA        | A       | 2 | -1.953 | -3.890 | 1.164  | 1.00 | 0.00 | F |
| ATOM   | 18    | OP1       | DA        | A       | 2 | -2.497 | -5.256 | 1.813  | 1.00 | 0.00 | O |
| ATOM   | 19    | OP2       | DA        | A       | 2 | -1.613 | -2.918 | 2.231  | 1.00 | 0.00 | O |
| ATOM   | 20    | O5'       | DA        | A       | 2 | -0.767 | -4.425 | 0.227  | 1.00 | 0.00 | O |
| ATOM   | 21    | C5'       | DA        | A       | 2 | -0.428 | -3.914 | -1.084 | 1.00 | 0.00 | C |
| ATOM   | 22    | C4'       | DA        | A       | 2 | 0.532  | -2.742 | -1.022 | 1.00 | 0.00 | C |
| ATOM   | 23    | O4'       | DA        | A       | 2 | -0.176 | -1.563 | -0.613 | 1.00 | 0.00 | O |
| ATOM   | 24    | C3'       | DA        | A       | 2 | 1.702  | -2.911 | -0.021 | 1.00 | 0.00 | C |
| ATOM   | 25    | O3'       | DA        | A       | 2 | 2.894  | -2.491 | -0.738 | 1.00 | 0.00 | O |
| ATOM   | 26    | C2'       | DA        | A       | 2 | 1.351  | -1.933 | 1.097  | 1.00 | 0.00 | C |
| ATOM   | 27    | C1'       | DA        | A       | 2 | 0.672  | -0.833 | 0.291  | 1.00 | 0.00 | C |
| ATOM   | 28    | N9        | DA        | A       | 2 | -0.141 | 0.087  | 1.037  | 1.00 | 0.00 | N |
| ATOM   | 29    | C8        | DA        | A       | 2 | -0.684 | -0.046 | 2.300  | 1.00 | 0.00 | C |
| ATOM   | 30    | N7        | DA        | A       | 2 | -1.473 | 0.946  | 2.639  | 1.00 | 0.00 | N |
| ATOM   | 31    | C5        | DA        | A       | 2 | -1.460 | 1.781  | 1.532  | 1.00 | 0.00 | C |
| ATOM   | 32    | C6        | DA        | A       | 2 | -2.058 | 3.027  | 1.267  | 1.00 | 0.00 | C |
| ATOM   | 33    | N6        | DA        | A       | 2 | -2.806 | 3.678  | 2.199  | 1.00 | 0.00 | N |
| ATOM   | 34    | N1        | DA        | A       | 2 | -1.826 | 3.618  | 0.081  | 1.00 | 0.00 | N |
| ATOM   | 35    | C2        | DA        | A       | 2 | -1.002 | 3.007  | -0.786 | 1.00 | 0.00 | C |
| ATOM   | 36    | N3        | DA        | A       | 2 | -0.358 | 1.842  | -0.648 | 1.00 | 0.00 | N |
| ATOM   | 37    | C4        | DA        | A       | 2 | -0.632 | 1.274  | 0.531  | 1.00 | 0.00 | C |
| ATOM   | 38    | F         | DA        | A       | 3 | 4.364  | -2.537 | -0.095 | 1.00 | 0.00 | F |
| ATOM   | 39    | OP1       | DA        | A       | 3 | 4.738  | -4.089 | 0.096  | 1.00 | 0.00 | O |
| ATOM   | 40    | OP2       | DA        | A       | 3 | 4.571  | -1.818 | 1.187  | 1.00 | 0.00 | O |
| ATOM   | 41    | O5'       | DA        | A       | 3 | 5.259  | -2.083 | -1.339 | 1.00 | 0.00 | O |
| ATOM   | 42    | C5'       | DA        | A       | 3 | 4.802  | -1.255 | -2.441 | 1.00 | 0.00 | C |
| ATOM   | 43    | C4'       | DA        | A       | 3 | 4.837  | 0.221  | -2.111 | 1.00 | 0.00 | C |
| ATOM   | 44    | O4'       | DA        | A       | 3 | 3.773  | 0.548  | -1.201 | 1.00 | 0.00 | O |
| ATOM   | 45    | C3'       | DA        | A       | 3 | 6.157  | 0.714  | -1.456 | 1.00 | 0.00 | C |
| ATOM   | 46    | O3'       | DA        | A       | 3 | 6.621  | 1.808  | -2.245 | 1.00 | 0.00 | O |
| ATOM   | 47    | C2'       | DA        | A       | 3 | 5.698  | 1.160  | -0.062 | 1.00 | 0.00 | C |
| ATOM   | 48    | C1'       | DA        | A       | 3 | 4.273  | 1.607  | -0.374 | 1.00 | 0.00 | C |
| ATOM   | 49    | N9        | DA        | A       | 3 | 3.394  | 1.798  | 0.747  | 1.00 | 0.00 | N |
| ATOM   | 50    | C8        | DA        | A       | 3 | 3.163  | 0.945  | 1.811  | 1.00 | 0.00 | C |
| ATOM   | 51    | N7        | DA        | A       | 3 | 2.260  | 1.393  | 2.653  | 1.00 | 0.00 | N |
| ATOM   | 52    | C5        | DA        | A       | 3 | 1.876  | 2.615  | 2.123  | 1.00 | 0.00 | C |
| ATOM   | 53    | C6        | DA        | A       | 3 | 0.930  | 3.584  | 2.520  | 1.00 | 0.00 | C |
| ATOM   | 54    | N6        | DA        | A       | 3 | 0.158  | 3.447  | 3.633  | 1.00 | 0.00 | N |
| ATOM   | 55    | N1        | DA        | A       | 3 | 0.797  | 4.699  | 1.773  | 1.00 | 0.00 | N |
| ATOM   | 56    | C2        | DA        | A       | 3 | 1.547  | 4.825  | 0.667  | 1.00 | 0.00 | C |
| ATOM   | 57    | N3        | DA        | A       | 3 | 2.447  | 3.972  | 0.166  | 1.00 | 0.00 | N |
| ATOM   | 58    | C4        | DA        | A       | 3 | 2.567  | 2.885  | 0.937  | 1.00 | 0.00 | C |
| END    |       |           |           |         |   |        |        |        |      |      |   |

| COMPND | CAA / | D-B3LYP / | H MODEL / | SINGLY IONIZED |   |        |        |        |      |      |   |
|--------|-------|-----------|-----------|----------------|---|--------|--------|--------|------|------|---|
| ATOM   | 1     | O5'       | DC        | A              | 1 | 6.234  | 0.592  | 0.562  | 1.00 | 0.00 | O |
| ATOM   | 2     | C5'       | DC        | A              | 1 | 6.392  | 1.838  | -0.116 | 1.00 | 0.00 | C |
| ATOM   | 3     | C4'       | DC        | A              | 1 | 5.038  | 2.319  | -0.617 | 1.00 | 0.00 | C |
| ATOM   | 4     | O4'       | DC        | A              | 1 | 4.576  | 1.498  | -1.704 | 1.00 | 0.00 | O |
| ATOM   | 5     | C3'       | DC        | A              | 1 | 3.938  | 2.261  | 0.452  | 1.00 | 0.00 | C |
| ATOM   | 6     | O3'       | DC        | A              | 1 | 3.019  | 3.362  | 0.162  | 1.00 | 0.00 | O |
| ATOM   | 7     | C2'       | DC        | A              | 1 | 3.264  | 0.926  | 0.181  | 1.00 | 0.00 | C |
| ATOM   | 8     | C1'       | DC        | A              | 1 | 3.377  | 0.803  | -1.341 | 1.00 | 0.00 | C |
| ATOM   | 9     | N1        | DC        | A              | 1 | 3.459  | -0.572 | -1.821 | 1.00 | 0.00 | N |
| ATOM   | 10    | C2        | DC        | A              | 1 | 2.546  | -1.033 | -2.821 | 1.00 | 0.00 | C |
| ATOM   | 11    | O2        | DC        | A              | 1 | 1.708  | -0.258 | -3.284 | 1.00 | 0.00 | O |
| ATOM   | 12    | N3        | DC        | A              | 1 | 2.641  | -2.341 | -3.204 | 1.00 | 0.00 | N |
| ATOM   | 13    | C4        | DC        | A              | 1 | 3.611  | -3.117 | -2.724 | 1.00 | 0.00 | C |
| ATOM   | 14    | N4        | DC        | A              | 1 | 3.631  | -4.404 | -3.120 | 1.00 | 0.00 | N |
| ATOM   | 15    | C5        | DC        | A              | 1 | 4.611  | -2.644 | -1.810 | 1.00 | 0.00 | C |
| ATOM   | 16    | C6        | DC        | A              | 1 | 4.487  | -1.362 | -1.387 | 1.00 | 0.00 | C |
| ATOM   | 17    | F         | DA        | A              | 2 | 1.893  | 3.783  | 1.227  | 1.00 | 0.00 | F |
| ATOM   | 18    | OP1       | DA        | A              | 2 | 2.387  | 5.132  | 1.940  | 1.00 | 0.00 | O |
| ATOM   | 19    | OP2       | DA        | A              | 2 | 1.559  | 2.757  | 2.245  | 1.00 | 0.00 | O |
| ATOM   | 20    | O5'       | DA        | A              | 2 | 0.709  | 4.320  | 0.287  | 1.00 | 0.00 | O |
| ATOM   | 21    | C5'       | DA        | A              | 2 | 0.403  | 3.818  | -1.035 | 1.00 | 0.00 | C |
| ATOM   | 22    | C4'       | DA        | A              | 2 | -0.552 | 2.643  | -1.002 | 1.00 | 0.00 | C |

|        |       |         |    |    |         |                |        |        |      |      |   |
|--------|-------|---------|----|----|---------|----------------|--------|--------|------|------|---|
| ATOM   | 23    | O4'     | DA | A  | 2       | 0.140          | 1.464  | -0.557 | 1.00 | 0.00 | O |
| ATOM   | 24    | C3'     | DA | A  | 2       | -1.761         | 2.812  | -0.049 | 1.00 | 0.00 | C |
| ATOM   | 25    | O3'     | DA | A  | 2       | -2.912         | 2.372  | -0.812 | 1.00 | 0.00 | O |
| ATOM   | 26    | C2'     | DA | A  | 2       | -1.448         | 1.848  | 1.093  | 1.00 | 0.00 | C |
| ATOM   | 27    | C1'     | DA | A  | 2       | -0.738         | 0.746  | 0.316  | 1.00 | 0.00 | C |
| ATOM   | 28    | N9      | DA | A  | 2       | 0.068          | -0.174 | 1.091  | 1.00 | 0.00 | N |
| ATOM   | 29    | C8      | DA | A  | 2       | 0.651          | -0.000 | 2.317  | 1.00 | 0.00 | C |
| ATOM   | 30    | N7      | DA | A  | 2       | 1.517          | -0.960 | 2.639  | 1.00 | 0.00 | N |
| ATOM   | 31    | C5      | DA | A  | 2       | 1.496          | -1.798 | 1.571  | 1.00 | 0.00 | C |
| ATOM   | 32    | C6      | DA | A  | 2       | 2.221          | -2.987 | 1.260  | 1.00 | 0.00 | C |
| ATOM   | 33    | N6      | DA | A  | 2       | 3.127          | -3.491 | 2.090  | 1.00 | 0.00 | N |
| ATOM   | 34    | N1      | DA | A  | 2       | 1.975          | -3.605 | 0.081  | 1.00 | 0.00 | N |
| ATOM   | 35    | C2      | DA | A  | 2       | 1.069          | -3.076 | -0.735 | 1.00 | 0.00 | C |
| ATOM   | 36    | N3      | DA | A  | 2       | 0.340          | -1.936 | -0.574 | 1.00 | 0.00 | N |
| ATOM   | 37    | C4      | DA | A  | 2       | 0.595          | -1.352 | 0.580  | 1.00 | 0.00 | C |
| ATOM   | 38    | P       | DA | A  | 3       | -4.422         | 2.417  | -0.272 | 1.00 | 0.00 | P |
| ATOM   | 39    | OP1     | DA | A  | 3       | -4.848         | 3.964  | -0.204 | 1.00 | 0.00 | O |
| ATOM   | 40    | OP2     | DA | A  | 3       | -4.696         | 1.772  | 1.037  | 1.00 | 0.00 | O |
| ATOM   | 41    | O5'     | DA | A  | 3       | -5.215         | 1.846  | -1.536 | 1.00 | 0.00 | O |
| ATOM   | 42    | C5'     | DA | A  | 3       | -4.643         | 1.026  | -2.587 | 1.00 | 0.00 | C |
| ATOM   | 43    | C4'     | DA | A  | 3       | -4.605         | -0.440 | -2.216 | 1.00 | 0.00 | C |
| ATOM   | 44    | O4'     | DA | A  | 3       | -3.606         | -0.665 | -1.201 | 1.00 | 0.00 | O |
| ATOM   | 45    | C3'     | DA | A  | 3       | -5.940         | -1.007 | -1.661 | 1.00 | 0.00 | C |
| ATOM   | 46    | O3'     | DA | A  | 3       | -6.226         | -2.185 | -2.409 | 1.00 | 0.00 | O |
| ATOM   | 47    | C2'     | DA | A  | 3       | -5.594         | -1.324 | -0.200 | 1.00 | 0.00 | C |
| ATOM   | 48    | C1'     | DA | A  | 3       | -4.122         | -1.688 | -0.347 | 1.00 | 0.00 | C |
| ATOM   | 49    | N9      | DA | A  | 3       | -3.346         | -1.721 | 0.871  | 1.00 | 0.00 | N |
| ATOM   | 50    | C8      | DA | A  | 3       | -3.376         | -0.838 | 1.924  | 1.00 | 0.00 | C |
| ATOM   | 51    | N7      | DA | A  | 3       | -2.511         | -1.131 | 2.885  | 1.00 | 0.00 | N |
| ATOM   | 52    | C5      | DA | A  | 3       | -1.889         | -2.263 | 2.436  | 1.00 | 0.00 | C |
| ATOM   | 53    | C6      | DA | A  | 3       | -0.862         | -3.076 | 2.981  | 1.00 | 0.00 | C |
| ATOM   | 54    | N6      | DA | A  | 3       | -0.307         | -2.816 | 4.164  | 1.00 | 0.00 | N |
| ATOM   | 55    | N1      | DA | A  | 3       | -0.419         | -4.140 | 2.260  | 1.00 | 0.00 | N |
| ATOM   | 56    | C2      | DA | A  | 3       | -0.991         | -4.389 | 1.083  | 1.00 | 0.00 | C |
| ATOM   | 57    | N3      | DA | A  | 3       | -1.979         | -3.701 | 0.465  | 1.00 | 0.00 | N |
| ATOM   | 58    | C4      | DA | A  | 3       | -2.378         | -2.656 | 1.180  | 1.00 | 0.00 | C |
| END    |       |         |    |    |         |                |        |        |      |      |   |
| COMPND | ACC / | D-B3LYP | /  | NA | MODEL / | NEUTRAL        |        |        |      |      |   |
| ATOM   | 1     | O5'     | DA | A  | 1       | 7.165          | 0.633  | 0.116  | 1.00 | 0.00 | O |
| ATOM   | 2     | C5'     | DA | A  | 1       | 6.985          | 1.644  | -0.873 | 1.00 | 0.00 | C |
| ATOM   | 3     | C4'     | DA | A  | 1       | 5.501          | 1.892  | -1.110 | 1.00 | 0.00 | C |
| ATOM   | 4     | O4'     | DA | A  | 1       | 4.874          | 0.718  | -1.658 | 1.00 | 0.00 | O |
| ATOM   | 5     | C3'     | DA | A  | 1       | 4.691          | 2.229  | 0.150  | 1.00 | 0.00 | C |
| ATOM   | 6     | O3'     | DA | A  | 1       | 3.547          | 2.987  | -0.296 | 1.00 | 0.00 | O |
| ATOM   | 7     | C2'     | DA | A  | 1       | 4.273          | 0.847  | 0.631  | 1.00 | 0.00 | C |
| ATOM   | 8     | C1'     | DA | A  | 1       | 3.968          | 0.158  | -0.701 | 1.00 | 0.00 | C |
| ATOM   | 9     | N9      | DA | A  | 1       | 4.109          | -1.284 | -0.664 | 1.00 | 0.00 | N |
| ATOM   | 10    | C8      | DA | A  | 1       | 4.941          | -2.053 | 0.125  | 1.00 | 0.00 | C |
| ATOM   | 11    | N7      | DA | A  | 1       | 4.717          | -3.344 | 0.032  | 1.00 | 0.00 | N |
| ATOM   | 12    | C5      | DA | A  | 1       | 3.686          | -3.436 | -0.888 | 1.00 | 0.00 | C |
| ATOM   | 13    | C6      | DA | A  | 1       | 2.932          | -4.522 | -1.373 | 1.00 | 0.00 | C |
| ATOM   | 14    | N6      | DA | A  | 1       | 3.084          | -5.780 | -0.875 | 1.00 | 0.00 | N |
| ATOM   | 15    | N1      | DA | A  | 1       | 1.982          | -4.294 | -2.298 | 1.00 | 0.00 | N |
| ATOM   | 16    | C2      | DA | A  | 1       | 1.746          | -3.023 | -2.664 | 1.00 | 0.00 | C |
| ATOM   | 17    | N3      | DA | A  | 1       | 2.335          | -1.904 | -2.230 | 1.00 | 0.00 | N |
| ATOM   | 18    | C4      | DA | A  | 1       | 3.301          | -2.173 | -1.342 | 1.00 | 0.00 | C |
| ATOM   | 19    | P       | DC | A  | 2       | 2.448          | 3.587  | 0.763  | 1.00 | 0.00 | P |
| ATOM   | 20    | OP1     | DC | A  | 2       | 3.005          | 4.773  | 1.523  | 1.00 | 0.00 | O |
| ATOM   | 21    | OP2     | DC | A  | 2       | 1.857          | 2.497  | 1.646  | 1.00 | 0.00 | O |
| ATOM   | 22    | O5'     | DC | A  | 2       | 1.362          | 4.156  | -0.310 | 1.00 | 0.00 | O |
| ATOM   | 23    | C5'     | DC | A  | 2       | 1.051          | 3.580  | -1.588 | 1.00 | 0.00 | C |
| ATOM   | 24    | C4'     | DC | A  | 2       | 0.000          | 2.481  | -1.552 | 1.00 | 0.00 | C |
| ATOM   | 25    | O4'     | DC | A  | 2       | 0.598          | 1.218  | -1.217 | 1.00 | 0.00 | O |
| ATOM   | 26    | C3'     | DC | A  | 2       | -1.162         | 2.706  | -0.546 | 1.00 | 0.00 | C |
| ATOM   | 27    | O3'     | DC | A  | 2       | -2.384         | 2.709  | -1.312 | 1.00 | 0.00 | O |
| ATOM   | 28    | C2'     | DC | A  | 2       | -1.039         | 1.506  | 0.394  | 1.00 | 0.00 | C |
| ATOM   | 29    | C1'     | DC | A  | 2       | -0.411         | 0.466  | -0.532 | 1.00 | 0.00 | C |
| ATOM   | 30    | N1      | DC | A  | 2       | 0.203          | -0.685 | 0.103  | 1.00 | 0.00 | N |
| ATOM   | 31    | C2      | DC | A  | 2       | -0.175         | -2.002 | -0.311 | 1.00 | 0.00 | C |
| ATOM   | 32    | O2      | DC | A  | 2       | -1.039         | -2.143 | -1.177 | 1.00 | 0.00 | O |
| ATOM   | 33    | N3      | DC | A  | 2       | 0.456          | -3.055 | 0.285  | 1.00 | 0.00 | N |
| ATOM   | 34    | C4      | DC | A  | 2       | 1.398          | -2.853 | 1.193  | 1.00 | 0.00 | C |
| ATOM   | 35    | N4      | DC | A  | 2       | 1.995          | -3.950 | 1.737  | 1.00 | 0.00 | N |
| ATOM   | 36    | C5      | DC | A  | 2       | 1.776          | -1.547 | 1.648  | 1.00 | 0.00 | C |
| ATOM   | 37    | C6      | DC | A  | 2       | 1.149          | -0.491 | 1.063  | 1.00 | 0.00 | C |
| ATOM   | 38    | P       | DC | A  | 3       | -3.837         | 2.872  | -0.554 | 1.00 | 0.00 | P |
| ATOM   | 39    | OP1     | DC | A  | 3       | -4.713         | 3.742  | -1.427 | 1.00 | 0.00 | O |
| ATOM   | 40    | OP2     | DC | A  | 3       | -3.662         | 3.262  | 0.896  | 1.00 | 0.00 | O |
| ATOM   | 41    | O5'     | DC | A  | 3       | -4.389         | 1.315  | -0.571 | 1.00 | 0.00 | O |
| ATOM   | 42    | C5'     | DC | A  | 3       | -4.651         | 0.739  | -1.864 | 1.00 | 0.00 | C |
| ATOM   | 43    | C4'     | DC | A  | 3       | -5.356         | -0.596 | -1.717 | 1.00 | 0.00 | C |
| ATOM   | 44    | O4'     | DC | A  | 3       | -4.466         | -1.567 | -1.141 | 1.00 | 0.00 | O |
| ATOM   | 45    | C3'     | DC | A  | 3       | -6.610         | -0.570 | -0.825 | 1.00 | 0.00 | C |
| ATOM   | 46    | O3'     | DC | A  | 3       | -7.538         | -1.494 | -1.394 | 1.00 | 0.00 | O |
| ATOM   | 47    | C2'     | DC | A  | 3       | -6.069         | -1.065 | 0.516  | 1.00 | 0.00 | C |
| ATOM   | 48    | C1'     | DC | A  | 3       | -5.011         | -2.083 | 0.075  | 1.00 | 0.00 | C |
| ATOM   | 49    | N1      | DC | A  | 3       | -3.917         | -2.272 | 1.026  | 1.00 | 0.00 | N |
| ATOM   | 50    | C2      | DC | A  | 3       | -3.593         | -3.580 | 1.497  | 1.00 | 0.00 | C |
| ATOM   | 51    | O2      | DC | A  | 3       | -4.295         | -4.537 | 1.160  | 1.00 | 0.00 | O |
| ATOM   | 52    | N3      | DC | A  | 3       | -2.506         | -3.707 | 2.315  | 1.00 | 0.00 | N |
| ATOM   | 53    | C4      | DC | A  | 3       | -1.790         | -2.641 | 2.653  | 1.00 | 0.00 | C |
| ATOM   | 54    | N4      | DC | A  | 3       | -0.734         | -2.825 | 3.488  | 1.00 | 0.00 | N |
| ATOM   | 55    | C5      | DC | A  | 3       | -2.095         | -1.316 | 2.198  | 1.00 | 0.00 | C |
| ATOM   | 56    | C6      | DC | A  | 3       | -3.154         | -1.194 | 1.361  | 1.00 | 0.00 | C |
| END    |       |         |    |    |         |                |        |        |      |      |   |
| COMPND | ACC / | D-B3LYP | /  | NA | MODEL / | SINGLY IONIZED |        |        |      |      |   |
| ATOM   | 1     | O5'     | DA | A  | 1       | -7.099         | -1.048 | 0.057  | 1.00 | 0.00 | O |
| ATOM   | 2     | C5'     | DA | A  | 1       | -6.812         | -2.024 | -0.945 | 1.00 | 0.00 | C |
| ATOM   | 3     | C4'     | DA | A  | 1       | -5.308         | -2.158 | -1.134 | 1.00 | 0.00 | C |
| ATOM   | 4     | O4'     | DA | A  | 1       | -4.755         | -0.953 | -1.711 | 1.00 | 0.00 | O |
| ATOM   | 5     | C3'     | DA | A  | 1       | -4.507         | -2.386 | 0.155  | 1.00 | 0.00 | C |
| ATOM   | 6     | O3'     | DA | A  | 1       | -3.307         | -3.081 | -0.228 | 1.00 | 0.00 | O |
| ATOM   | 7     | C2'     | DA | A  | 1       | -4.187         | -0.960 | 0.591  | 1.00 | 0.00 | C |
| ATOM   | 8     | C1'     | DA | A  | 1       | -3.944         | -0.282 | -0.763 | 1.00 | 0.00 | C |
| ATOM   | 9     | N9      | DA | A  | 1       | -4.304         | 1.139  | -0.751 | 1.00 | 0.00 | N |
| ATOM   | 10    | C8      | DA | A  | 1       | -5.469         | 1.689  | -0.317 | 1.00 | 0.00 | C |
| ATOM   | 11    | N7      | DA | A  | 1       | -5.501         | 3.029  | -0.396 | 1.00 | 0.00 | N |
| ATOM   | 12    | C5      | DA | A  | 1       | -4.299         | 3.350  | -0.913 | 1.00 | 0.00 | C |
| ATOM   | 13    | C6      | DA | A  | 1       | -3.690         | 4.598  | -1.266 | 1.00 | 0.00 | C |
| ATOM   | 14    | N6      | DA | A  | 1       | -4.306         | 5.753  | -1.071 | 1.00 | 0.00 | N |
| ATOM   | 15    | N1      | DA | A  | 1       | -2.450         | 4.590  | -1.820 | 1.00 | 0.00 | N |
| ATOM   | 16    | C2      | DA | A  | 1       | -1.854         | 3.426  | -2.014 | 1.00 | 0.00 | C |
| ATOM   | 17    | N3      | DA | A  | 1       | -2.334         | 2.163  | -1.745 | 1.00 | 0.00 | N |
| ATOM   | 18    | C4      | DA | A  | 1       | -3.517         | 2.191  | -1.181 | 1.00 | 0.00 | C |
| ATOM   | 19    | P       | DC | A  | 2       | -2.278         | -3.640 | 0.922  | 1.00 | 0.00 | P |
| ATOM   | 20    | OP1     | DC | A  | 2       | -2.909         | -4.764 | 1.716  | 1.00 | 0.00 | O |
| ATOM   | 21    | OP2     | DC | A  | 2       | -1.732         | -2.501 | 1.776  | 1.00 | 0.00 | O |

|      |    |     |    |   |   |        |        |        |      |      |   |
|------|----|-----|----|---|---|--------|--------|--------|------|------|---|
| ATOM | 22 | O5' | DC | A | 2 | -1.130 | -4.268 | -0.045 | 1.00 | 0.00 | O |
| ATOM | 23 | C5' | DC | A | 2 | -0.841 | -3.874 | -1.397 | 1.00 | 0.00 | C |
| ATOM | 24 | C4' | DC | A | 2 | 0.186  | -2.763 | -1.509 | 1.00 | 0.00 | C |
| ATOM | 25 | O4' | DC | A | 2 | -0.420 | -1.481 | -1.249 | 1.00 | 0.00 | O |
| ATOM | 26 | C3' | DC | A | 2 | 1.397  | -2.887 | -0.543 | 1.00 | 0.00 | C |
| ATOM | 27 | O3' | DC | A | 2 | 2.583  | -2.807 | -1.360 | 1.00 | 0.00 | O |
| ATOM | 28 | C2' | DC | A | 2 | 1.212  | -1.681 | 0.380  | 1.00 | 0.00 | C |
| ATOM | 29 | C1' | DC | A | 2 | 0.577  | -0.693 | -0.592 | 1.00 | 0.00 | C |
| ATOM | 30 | N1  | DC | A | 2 | -0.050 | 0.481  | -0.011 | 1.00 | 0.00 | N |
| ATOM | 31 | C2  | DC | A | 2 | 0.306  | 1.772  | -0.495 | 1.00 | 0.00 | C |
| ATOM | 32 | O2  | DC | A | 2 | 1.104  | 1.889  | -1.421 | 1.00 | 0.00 | O |
| ATOM | 33 | N3  | DC | A | 2 | -0.282 | 2.861  | 0.098  | 1.00 | 0.00 | N |
| ATOM | 34 | C4  | DC | A | 2 | -1.239 | 2.694  | 1.013  | 1.00 | 0.00 | C |
| ATOM | 35 | N4  | DC | A | 2 | -1.888 | 3.804  | 1.414  | 1.00 | 0.00 | N |
| ATOM | 36 | C5  | DC | A | 2 | -1.619 | 1.409  | 1.507  | 1.00 | 0.00 | C |
| ATOM | 37 | C6  | DC | A | 2 | -0.989 | 0.330  | 0.962  | 1.00 | 0.00 | C |
| ATOM | 38 | P   | DC | A | 3 | 4.073  | -2.683 | -0.672 | 1.00 | 0.00 | P |
| ATOM | 39 | OP1 | DC | A | 3 | 5.056  | -3.347 | -1.608 | 1.00 | 0.00 | O |
| ATOM | 40 | OP2 | DC | A | 3 | 4.052  | -3.117 | 0.775  | 1.00 | 0.00 | O |
| ATOM | 41 | O5' | DC | A | 3 | 4.303  | -1.047 | -0.673 | 1.00 | 0.00 | O |
| ATOM | 42 | C5' | DC | A | 3 | 4.468  | -0.396 | -1.947 | 1.00 | 0.00 | C |
| ATOM | 43 | C4' | DC | A | 3 | 5.174  | 0.937  | -1.773 | 1.00 | 0.00 | C |
| ATOM | 44 | O4' | DC | A | 3 | 4.310  | 1.885  | -1.123 | 1.00 | 0.00 | O |
| ATOM | 45 | C3' | DC | A | 3 | 6.459  | 0.875  | -0.931 | 1.00 | 0.00 | C |
| ATOM | 46 | O3' | DC | A | 3 | 7.359  | 1.836  | -1.482 | 1.00 | 0.00 | O |
| ATOM | 47 | C2  | DC | A | 3 | 5.964  | 1.291  | 0.455  | 1.00 | 0.00 | C |
| ATOM | 48 | C1' | DC | A | 3 | 4.879  | 2.319  | 0.111  | 1.00 | 0.00 | C |
| ATOM | 49 | N1  | DC | A | 3 | 3.805  | 2.418  | 1.101  | 1.00 | 0.00 | N |
| ATOM | 50 | C2  | DC | A | 3 | 3.494  | 3.676  | 1.704  | 1.00 | 0.00 | C |
| ATOM | 51 | O2  | DC | A | 3 | 4.198  | 4.657  | 1.452  | 1.00 | 0.00 | O |
| ATOM | 52 | N3  | DC | A | 3 | 2.416  | 3.727  | 2.541  | 1.00 | 0.00 | N |
| ATOM | 53 | C4  | DC | A | 3 | 1.705  | 2.634  | 2.792  | 1.00 | 0.00 | C |
| ATOM | 54 | N4  | DC | A | 3 | 0.656  | 2.744  | 3.639  | 1.00 | 0.00 | N |
| ATOM | 55 | C5  | DC | A | 3 | 2.007  | 1.354  | 2.218  | 1.00 | 0.00 | C |
| ATOM | 56 | C6  | DC | A | 3 | 3.054  | 1.310  | 1.356  | 1.00 | 0.00 | C |
| END  |    |     |    |   |   |        |        |        |      |      |   |

| COMPND | AAC | /   | D-B3LYP | / | NA MODEL | /      | NEUTRAL |        |      |      |   |
|--------|-----|-----|---------|---|----------|--------|---------|--------|------|------|---|
| ATOM   | 1   | O5' | DA      | A | 1        | 6.694  | 2.349   | -0.633 | 1.00 | 0.00 | O |
| ATOM   | 2   | C5' | DA      | A | 1        | 6.012  | 2.782   | -1.806 | 1.00 | 0.00 | C |
| ATOM   | 3   | C4' | DA      | A | 1        | 4.537  | 2.434   | -1.689 | 1.00 | 0.00 | C |
| ATOM   | 4   | O4' | DA      | A | 1        | 4.368  | 1.002   | -1.751 | 1.00 | 0.00 | O |
| ATOM   | 5   | C3' | DA      | A | 1        | 3.898  | 2.882   | -0.362 | 1.00 | 0.00 | C |
| ATOM   | 6   | O3' | DA      | A | 1        | 2.536  | 3.253   | -0.644 | 1.00 | 0.00 | O |
| ATOM   | 7   | C2' | DA      | A | 1        | 3.947  | 1.608   | 0.477  | 1.00 | 0.00 | C |
| ATOM   | 8   | C1' | DA      | A | 1        | 3.663  | 0.558   | -0.593 | 1.00 | 0.00 | C |
| ATOM   | 9   | N9  | DA      | A | 1        | 4.115  | -0.777  | -0.251 | 1.00 | 0.00 | N |
| ATOM   | 10  | C8  | DA      | A | 1        | 4.754  | -1.204  | 0.895  | 1.00 | 0.00 | C |
| ATOM   | 11  | N7  | DA      | A | 1        | 4.950  | -2.502  | 0.943  | 1.00 | 0.00 | N |
| ATOM   | 12  | C5  | DA      | A | 1        | 4.409  | -2.963  | -0.245 | 1.00 | 0.00 | C |
| ATOM   | 13  | C6  | DA      | A | 1        | 4.229  | -4.257  | -0.769 | 1.00 | 0.00 | C |
| ATOM   | 14  | N6  | DA      | A | 1        | 4.580  | -5.369  | -0.068 | 1.00 | 0.00 | N |
| ATOM   | 15  | N1  | DA      | A | 1        | 3.626  | -4.395  | -1.964 | 1.00 | 0.00 | N |
| ATOM   | 16  | C2  | DA      | A | 1        | 3.165  | -3.289  | -2.573 | 1.00 | 0.00 | C |
| ATOM   | 17  | N3  | DA      | A | 1        | 3.229  | -2.017  | -2.166 | 1.00 | 0.00 | N |
| ATOM   | 18  | C4  | DA      | A | 1        | 3.872  | -1.912  | -0.994 | 1.00 | 0.00 | C |
| ATOM   | 19  | P   | DA      | A | 2        | 1.697  | 4.055   | 0.513  | 1.00 | 0.00 | P |
| ATOM   | 20  | OP1 | DA      | A | 2        | 2.399  | 5.351   | 0.870  | 1.00 | 0.00 | O |
| ATOM   | 21  | OP2 | DA      | A | 2        | 1.391  | 3.161   | 1.708  | 1.00 | 0.00 | O |
| ATOM   | 22  | O5' | DA      | A | 2        | 0.323  | 4.367   | -0.303 | 1.00 | 0.00 | O |
| ATOM   | 23  | C5' | DA      | A | 2        | -0.024 | 3.930   | -1.627 | 1.00 | 0.00 | C |
| ATOM   | 24  | C4' | DA      | A | 2        | -0.884 | 2.676   | -1.617 | 1.00 | 0.00 | C |
| ATOM   | 25  | O4' | DA      | A | 2        | -0.075 | 1.515   | -1.350 | 1.00 | 0.00 | O |
| ATOM   | 26  | C3' | DA      | A | 2        | -1.993 | 2.690   | -0.539 | 1.00 | 0.00 | C |
| ATOM   | 27  | O3' | DA      | A | 2        | -3.169 | 2.114   | -1.142 | 1.00 | 0.00 | O |
| ATOM   | 28  | C2' | DA      | A | 2        | -1.422 | 1.766   | 0.532  | 1.00 | 0.00 | C |
| ATOM   | 29  | C1' | DA      | A | 2        | -0.752 | 0.727   | -0.361 | 1.00 | 0.00 | C |
| ATOM   | 30  | N9  | DA      | A | 2        | 0.189  | -0.145  | 0.291  | 1.00 | 0.00 | N |
| ATOM   | 31  | C8  | DA      | A | 2        | 0.986  | 0.122   | 1.388  | 1.00 | 0.00 | C |
| ATOM   | 32  | N7  | DA      | A | 2        | 1.647  | -0.930  | 1.822  | 1.00 | 0.00 | N |
| ATOM   | 33  | C5  | DA      | A | 2        | 1.262  | -1.950  | 0.966  | 1.00 | 0.00 | C |
| ATOM   | 34  | C6  | DA      | A | 2        | 1.546  | -3.328  | 0.927  | 1.00 | 0.00 | C |
| ATOM   | 35  | N6  | DA      | A | 2        | 2.318  | -3.940  | 1.877  | 1.00 | 0.00 | N |
| ATOM   | 36  | N1  | DA      | A | 2        | 0.989  | -4.078  | -0.039 | 1.00 | 0.00 | N |
| ATOM   | 37  | C2  | DA      | A | 2        | 0.152  | -3.486  | -0.905 | 1.00 | 0.00 | C |
| ATOM   | 38  | N3  | DA      | A | 2        | -0.230 | -2.206  | -0.953 | 1.00 | 0.00 | N |
| ATOM   | 39  | C4  | DA      | A | 2        | 0.359  | -1.485  | 0.008  | 1.00 | 0.00 | C |
| ATOM   | 40  | P   | DC      | A | 3        | -4.596 | 2.135   | -0.334 | 1.00 | 0.00 | P |
| ATOM   | 41  | OP1 | DC      | A | 3        | -5.080 | 3.557   | -0.131 | 1.00 | 0.00 | O |
| ATOM   | 42  | OP2 | DC      | A | 3        | -4.535 | 1.306   | 0.942  | 1.00 | 0.00 | O |
| ATOM   | 43  | O5' | DC      | A | 3        | -5.533 | 1.432   | -1.466 | 1.00 | 0.00 | O |
| ATOM   | 44  | C5' | DC      | A | 3        | -5.095 | 0.485   | -2.454 | 1.00 | 0.00 | C |
| ATOM   | 45  | C4' | DC      | A | 3        | -5.059 | -0.953  | -1.972 | 1.00 | 0.00 | C |
| ATOM   | 46  | O4' | DC      | A | 3        | -3.884 | -1.198  | -1.184 | 1.00 | 0.00 | O |
| ATOM   | 47  | C3' | DC      | A | 3        | -6.278 | -1.399  | -1.118 | 1.00 | 0.00 | C |
| ATOM   | 48  | O3' | DC      | A | 3        | -6.868 | -2.515  | -1.787 | 1.00 | 0.00 | O |
| ATOM   | 49  | C2' | DC      | A | 3        | -5.633 | -1.791  | 0.216  | 1.00 | 0.00 | C |
| ATOM   | 50  | C1' | DC      | A | 3        | -4.247 | -2.229  | -0.256 | 1.00 | 0.00 | C |
| ATOM   | 51  | N1  | DC      | A | 3        | -3.224 | -2.346  | 0.768  | 1.00 | 0.00 | N |
| ATOM   | 52  | C2  | DC      | A | 3        | -2.551 | -3.595  | 0.951  | 1.00 | 0.00 | C |
| ATOM   | 53  | O2  | DC      | A | 3        | -2.864 | -4.562  | 0.252  | 1.00 | 0.00 | O |
| ATOM   | 54  | N3  | DC      | A | 3        | -1.583 | -3.655  | 1.910  | 1.00 | 0.00 | N |
| ATOM   | 55  | C4  | DC      | A | 3        | -1.268 | -2.581  | 2.622  | 1.00 | 0.00 | C |
| ATOM   | 56  | N4  | DC      | A | 3        | -0.280 | -2.709  | 3.552  | 1.00 | 0.00 | N |
| ATOM   | 57  | C5  | DC      | A | 3        | -1.935 | -1.322  | 2.468  | 1.00 | 0.00 | C |
| ATOM   | 58  | C6  | DC      | A | 3        | -2.908 | -1.254  | 1.521  | 1.00 | 0.00 | C |
| END    |     |     |         |   |          |        |         |        |      |      |   |

| COMPND | AAC | /   | D-B3LYP | / | NA MODEL | /     | SINGLY IONIZED |        |      |      |   |
|--------|-----|-----|---------|---|----------|-------|----------------|--------|------|------|---|
| ATOM   | 1   | O5' | DA      | A | 1        | 6.440 | 1.524          | -0.259 | 1.00 | 0.00 | O |
| ATOM   | 2   | C5' | DA      | A | 1        | 6.103 | 2.379          | -1.349 | 1.00 | 0.00 | C |
| ATOM   | 3   | C4' | DA      | A | 1        | 4.591 | 2.461          | -1.506 | 1.00 | 0.00 | C |
| ATOM   | 4   | O4' | DA      | A | 1        | 4.038 | 1.169          | -1.824 | 1.00 | 0.00 | O |
| ATOM   | 5   | C3' | DA      | A | 1        | 3.823 | 2.910          | -0.259 | 1.00 | 0.00 | C |
| ATOM   | 6   | O3' | DA      | A | 1        | 2.564 | 3.432          | -0.726 | 1.00 | 0.00 | O |
| ATOM   | 7   | C2' | DA      | A | 1        | 3.615 | 1.593          | 0.480  | 1.00 | 0.00 | C |
| ATOM   | 8   | C1' | DA      | A | 1        | 3.360 | 0.636          | -0.689 | 1.00 | 0.00 | C |
| ATOM   | 9   | N9  | DA      | A | 1        | 3.824 | -0.731         | -0.457 | 1.00 | 0.00 | N |
| ATOM   | 10  | C8  | DA      | A | 1        | 4.820 | -1.197         | 0.359  | 1.00 | 0.00 | C |
| ATOM   | 11  | N7  | DA      | A | 1        | 5.060 | -2.497         | 0.225  | 1.00 | 0.00 | N |
| ATOM   | 12  | C5  | DA      | A | 1        | 4.192 | -2.894         | -0.751 | 1.00 | 0.00 | C |
| ATOM   | 13  | C6  | DA      | A | 1        | 3.958 | -4.147         | -1.378 | 1.00 | 0.00 | C |
| ATOM   | 14  | N6  | DA      | A | 1        | 4.616 | -5.252         | -1.017 | 1.00 | 0.00 | N |
| ATOM   | 15  | N1  | DA      | A | 1        | 3.043 | -4.212         | -2.372 | 1.00 | 0.00 | N |
| ATOM   | 16  | C2  | DA      | A | 1        | 2.380 | -3.099         | -2.695 | 1.00 | 0.00 | C |
| ATOM   | 17  | N3  | DA      | A | 1        | 2.495 | -1.858         | -2.171 | 1.00 | 0.00 | N |
| ATOM   | 18  | C4  | DA      | A | 1        | 3.409 | -1.819         | -1.208 | 1.00 | 0.00 | C |
| ATOM   | 19  | P   | DA      | A | 2        | 1.523 | 4.168          | 0.305  | 1.00 | 0.00 | P |

|      |    |     |    |   |   |        |        |        |      |      |   |
|------|----|-----|----|---|---|--------|--------|--------|------|------|---|
| ATOM | 20 | OP1 | DA | A | 2 | 2.007  | 5.559  | 0.658  | 1.00 | 0.00 | O |
| ATOM | 21 | OP2 | DA | A | 2 | 1.213  | 3.290  | 1.510  | 1.00 | 0.00 | O |
| ATOM | 22 | O5' | DA | A | 2 | 0.220  | 4.286  | -0.668 | 1.00 | 0.00 | O |
| ATOM | 23 | C5' | DA | A | 2 | 0.001  | 3.613  | -1.917 | 1.00 | 0.00 | C |
| ATOM | 24 | C4' | DA | A | 2 | -0.849 | 2.361  | -1.779 | 1.00 | 0.00 | C |
| ATOM | 25 | O4' | DA | A | 2 | -0.059 | 1.269  | -1.261 | 1.00 | 0.00 | O |
| ATOM | 26 | C3' | DA | A | 2 | -2.057 | 2.505  | -0.823 | 1.00 | 0.00 | C |
| ATOM | 27 | O3' | DA | A | 2 | -3.145 | 1.797  | -1.440 | 1.00 | 0.00 | O |
| ATOM | 28 | C2' | DA | A | 2 | -1.573 | 1.779  | 0.431  | 1.00 | 0.00 | C |
| ATOM | 29 | C1' | DA | A | 2 | -0.825 | 0.630  | -0.234 | 1.00 | 0.00 | C |
| ATOM | 30 | N9  | DA | A | 2 | 0.082  | -0.119 | 0.609  | 1.00 | 0.00 | N |
| ATOM | 31 | C8  | DA | A | 2 | 0.807  | 0.320  | 1.680  | 1.00 | 0.00 | C |
| ATOM | 32 | N7  | DA | A | 2 | 1.617  | -0.606 | 2.193  | 1.00 | 0.00 | N |
| ATOM | 33 | C5  | DA | A | 2 | 1.399  | -1.697 | 1.417  | 1.00 | 0.00 | C |
| ATOM | 34 | C6  | DA | A | 2 | 1.943  | -3.013 | 1.424  | 1.00 | 0.00 | C |
| ATOM | 35 | N6  | DA | A | 2 | 2.888  | -3.370 | 2.288  | 1.00 | 0.00 | N |
| ATOM | 36 | N1  | DA | A | 2 | 1.498  | -3.910 | 0.510  | 1.00 | 0.00 | N |
| ATOM | 37 | C2  | DA | A | 2 | 0.571  | -3.519 | -0.356 | 1.00 | 0.00 | C |
| ATOM | 38 | N3  | DA | A | 2 | 0.000  | -2.291 | -0.492 | 1.00 | 0.00 | N |
| ATOM | 39 | C4  | DA | A | 2 | 0.443  | -1.438 | 0.410  | 1.00 | 0.00 | C |
| ATOM | 40 | P   | DC | A | 3 | -4.655 | 1.797  | -0.805 | 1.00 | 0.00 | P |
| ATOM | 41 | OP1 | DC | A | 3 | -5.301 | 3.162  | -0.938 | 1.00 | 0.00 | O |
| ATOM | 42 | OP2 | DC | A | 3 | -4.680 | 1.232  | 0.609  | 1.00 | 0.00 | O |
| ATOM | 43 | O5' | DC | A | 3 | -5.364 | 0.782  | -1.866 | 1.00 | 0.00 | O |
| ATOM | 44 | C5' | DC | A | 3 | -4.692 | -0.219 | -2.649 | 1.00 | 0.00 | C |
| ATOM | 45 | C4' | DC | A | 3 | -4.507 | -1.545 | -1.936 | 1.00 | 0.00 | C |
| ATOM | 46 | O4' | DC | A | 3 | -3.451 | -1.462 | -0.965 | 1.00 | 0.00 | O |
| ATOM | 47 | C3' | DC | A | 3 | -5.762 | -2.075 | -1.191 | 1.00 | 0.00 | C |
| ATOM | 48 | O3' | DC | A | 3 | -6.035 | -3.375 | -1.714 | 1.00 | 0.00 | O |
| ATOM | 49 | C2' | DC | A | 3 | -5.299 | -2.121 | 0.270  | 1.00 | 0.00 | C |
| ATOM | 50 | C1' | DC | A | 3 | -3.804 | -2.376 | 0.080  | 1.00 | 0.00 | C |
| ATOM | 51 | N1  | DC | A | 3 | -2.947 | -2.151 | 1.232  | 1.00 | 0.00 | N |
| ATOM | 52 | C2  | DC | A | 3 | -2.003 | -3.154 | 1.610  | 1.00 | 0.00 | C |
| ATOM | 53 | O2  | DC | A | 3 | -1.947 | -4.209 | 0.971  | 1.00 | 0.00 | O |
| ATOM | 54 | N3  | DC | A | 3 | -1.180 | -2.892 | 2.665  | 1.00 | 0.00 | N |
| ATOM | 55 | C4  | DC | A | 3 | -1.286 | -1.743 | 3.336  | 1.00 | 0.00 | C |
| ATOM | 56 | N4  | DC | A | 3 | -0.466 | -1.564 | 4.390  | 1.00 | 0.00 | N |
| ATOM | 57 | C5  | DC | A | 3 | -2.220 | -0.720 | 2.976  | 1.00 | 0.00 | C |
| ATOM | 58 | C6  | DC | A | 3 | -3.024 | -0.968 | 1.907  | 1.00 | 0.00 | C |
| END  |    |     |    |   |   |        |        |        |      |      |   |

| COMPND | CCA / | D-B3LYP / | NA MODEL / | NEUTRAL |   |        |        |        |      |      |   |
|--------|-------|-----------|------------|---------|---|--------|--------|--------|------|------|---|
| ATOM   | 1     | O5'       | DC         | A       | 1 | -7.309 | -0.916 | -0.182 | 1.00 | 0.00 | O |
| ATOM   | 2     | C5'       | DC         | A       | 1 | -6.975 | -1.875 | -1.184 | 1.00 | 0.00 | C |
| ATOM   | 3     | C4'       | DC         | A       | 1 | -5.464 | -1.965 | -1.340 | 1.00 | 0.00 | C |
| ATOM   | 4     | O4'       | DC         | A       | 1 | -4.947 | -0.750 | -1.910 | 1.00 | 0.00 | O |
| ATOM   | 5     | C3'       | DC         | A       | 1 | -4.699 | -2.166 | -0.022 | 1.00 | 0.00 | C |
| ATOM   | 6     | O3'       | DC         | A       | 1 | -3.497 | -2.894 | -0.351 | 1.00 | 0.00 | O |
| ATOM   | 7     | C2'       | DC         | A       | 1 | -4.373 | -0.734 | 0.384  | 1.00 | 0.00 | C |
| ATOM   | 8     | C1'       | DC         | A       | 1 | -4.066 | -0.103 | -0.977 | 1.00 | 0.00 | C |
| ATOM   | 9     | N1        | DC         | A       | 1 | -4.275 | 1.337  | -1.046 | 1.00 | 0.00 | N |
| ATOM   | 10    | C2        | DC         | A       | 1 | -3.279 | 2.163  | -1.657 | 1.00 | 0.00 | C |
| ATOM   | 11    | O2        | DC         | A       | 1 | -2.309 | 1.636  | -2.204 | 1.00 | 0.00 | O |
| ATOM   | 12    | N3        | DC         | A       | 1 | -3.456 | 3.515  | -1.591 | 1.00 | 0.00 | N |
| ATOM   | 13    | C4        | DC         | A       | 1 | -4.563 | 4.023  | -1.064 | 1.00 | 0.00 | C |
| ATOM   | 14    | N4        | DC         | A       | 1 | -4.644 | 5.369  | -0.957 | 1.00 | 0.00 | N |
| ATOM   | 15    | C5        | DC         | A       | 1 | -5.653 | 3.213  | -0.597 | 1.00 | 0.00 | C |
| ATOM   | 16    | C6        | DC         | A       | 1 | -5.456 | 1.870  | -0.614 | 1.00 | 0.00 | C |
| ATOM   | 17    | P         | DC         | A       | 2 | -2.520 | -3.452 | 0.841  | 1.00 | 0.00 | P |
| ATOM   | 18    | OP1       | DC         | A       | 2 | -3.157 | -4.615 | 1.574  | 1.00 | 0.00 | O |
| ATOM   | 19    | OP2       | DC         | A       | 2 | -2.054 | -2.323 | 1.751  | 1.00 | 0.00 | O |
| ATOM   | 20    | O5'       | DC         | A       | 2 | -1.302 | -4.032 | -0.071 | 1.00 | 0.00 | O |
| ATOM   | 21    | C5'       | DC         | A       | 2 | -0.925 | -3.602 | -1.390 | 1.00 | 0.00 | C |
| ATOM   | 22    | C4'       | DC         | A       | 2 | 0.143  | -2.519 | -1.411 | 1.00 | 0.00 | C |
| ATOM   | 23    | O4'       | DC         | A       | 2 | -0.445 | -1.223 | -1.217 | 1.00 | 0.00 | O |
| ATOM   | 24    | C3'       | DC         | A       | 2 | 1.246  | -2.672 | -0.330 | 1.00 | 0.00 | C |
| ATOM   | 25    | O3'       | DC         | A       | 2 | 2.513  | -2.535 | -1.009 | 1.00 | 0.00 | O |
| ATOM   | 26    | C2'       | DC         | A       | 2 | 0.968  | -1.494 | 0.599  | 1.00 | 0.00 | C |
| ATOM   | 27    | C1'       | DC         | A       | 2 | 0.476  | -0.464 | -0.413 | 1.00 | 0.00 | C |
| ATOM   | 28    | N1        | DC         | A       | 2 | -0.200 | 0.710  | 0.100  | 1.00 | 0.00 | N |
| ATOM   | 29    | C2        | DC         | A       | 2 | 0.147  | 2.000  | -0.411 | 1.00 | 0.00 | C |
| ATOM   | 30    | O2        | DC         | A       | 2 | 1.056  | 2.103  | -1.236 | 1.00 | 0.00 | O |
| ATOM   | 31    | N3        | DC         | A       | 2 | -0.540 | 3.078  | 0.069  | 1.00 | 0.00 | N |
| ATOM   | 32    | C4        | DC         | A       | 2 | -1.525 | 2.913  | 0.936  | 1.00 | 0.00 | C |
| ATOM   | 33    | N4        | DC         | A       | 2 | -2.143 | 4.034  | 1.411  | 1.00 | 0.00 | N |
| ATOM   | 34    | C5        | DC         | A       | 2 | -1.920 | 1.633  | 1.439  | 1.00 | 0.00 | C |
| ATOM   | 35    | C6        | DC         | A       | 2 | -1.225 | 0.557  | 0.981  | 1.00 | 0.00 | C |
| ATOM   | 36    | P         | DA         | A       | 3 | 3.925  | -2.833 | -0.219 | 1.00 | 0.00 | P |
| ATOM   | 37    | OP1       | DA         | A       | 3 | 4.573  | -4.071 | -0.805 | 1.00 | 0.00 | O |
| ATOM   | 38    | OP2       | DA         | A       | 3 | 3.742  | -2.789 | -1.283 | 1.00 | 0.00 | O |
| ATOM   | 39    | O5'       | DA         | A       | 3 | 4.770  | -1.487 | -0.629 | 1.00 | 0.00 | O |
| ATOM   | 40    | C5'       | DA         | A       | 3 | 4.948  | -1.155 | -2.013 | 1.00 | 0.00 | C |
| ATOM   | 41    | C4'       | DA         | A       | 3 | 5.529  | 0.244  | -2.119 | 1.00 | 0.00 | C |
| ATOM   | 42    | O4'       | DA         | A       | 3 | 4.584  | 1.207  | -1.619 | 1.00 | 0.00 | O |
| ATOM   | 43    | C3'       | DA         | A       | 3 | 6.825  | 0.469  | -1.326 | 1.00 | 0.00 | C |
| ATOM   | 44    | O3'       | DA         | A       | 3 | 7.582  | 1.441  | -2.046 | 1.00 | 0.00 | O |
| ATOM   | 45    | C2'       | DA         | A       | 3 | 6.308  | 1.026  | -0.000 | 1.00 | 0.00 | C |
| ATOM   | 46    | C1'       | DA         | A       | 3 | 5.087  | 1.841  | -0.444 | 1.00 | 0.00 | C |
| ATOM   | 47    | N9        | DA         | A       | 3 | 4.039  | 1.910  | 0.556  | 1.00 | 0.00 | N |
| ATOM   | 48    | C8        | DA         | A       | 3 | 3.444  | 0.856  | 1.221  | 1.00 | 0.00 | C |
| ATOM   | 49    | N7        | DA         | A       | 3 | 2.450  | 1.219  | 2.000  | 1.00 | 0.00 | N |
| ATOM   | 50    | C5        | DA         | A       | 3 | 2.376  | 2.591  | 1.834  | 1.00 | 0.00 | C |
| ATOM   | 51    | C6        | DA         | A       | 3 | 1.496  | 3.566  | 2.341  | 1.00 | 0.00 | C |
| ATOM   | 52    | N6        | DA         | A       | 3 | 0.496  | 3.262  | 3.216  | 1.00 | 0.00 | N |
| ATOM   | 53    | N1        | DA         | A       | 3 | 1.670  | 4.850  | 1.970  | 1.00 | 0.00 | N |
| ATOM   | 54    | C2        | DA         | A       | 3 | 2.661  | 5.135  | 1.108  | 1.00 | 0.00 | C |
| ATOM   | 55    | N3        | DA         | A       | 3 | 3.539  | 4.304  | 0.534  | 1.00 | 0.00 | N |
| ATOM   | 56    | C4        | DA         | A       | 3 | 3.345  | 3.040  | 0.932  | 1.00 | 0.00 | C |
| END    |       |           |            |         |   |        |        |        |      |      |   |

| COMPND | CCA / | D-B3LYP / | NA MODEL / | SINGLY IONIZED |   |        |        |        |      |      |   |
|--------|-------|-----------|------------|----------------|---|--------|--------|--------|------|------|---|
| ATOM   | 1     | O5'       | DC         | A              | 1 | -7.286 | -0.567 | -0.118 | 1.00 | 0.00 | O |
| ATOM   | 2     | C5'       | DC         | A              | 1 | -7.029 | -1.636 | -1.028 | 1.00 | 0.00 | C |
| ATOM   | 3     | C4'       | DC         | A              | 1 | -5.530 | -1.858 | -1.164 | 1.00 | 0.00 | C |
| ATOM   | 4     | O4'       | DC         | A              | 1 | -4.916 | -0.740 | -1.832 | 1.00 | 0.00 | O |
| ATOM   | 5     | C3'       | DC         | A              | 1 | -4.781 | -2.005 | 0.170  | 1.00 | 0.00 | C |
| ATOM   | 6     | O3'       | DC         | A              | 1 | -3.639 | -2.846 | -0.099 | 1.00 | 0.00 | O |
| ATOM   | 7     | C2'       | DC         | A              | 1 | -4.347 | -0.573 | 0.452  | 1.00 | 0.00 | C |
| ATOM   | 8     | C1'       | DC         | A              | 1 | -3.980 | -0.096 | -0.956 | 1.00 | 0.00 | C |
| ATOM   | 9     | N1        | DC         | A              | 1 | -4.067 | 1.347  | -1.151 | 1.00 | 0.00 | N |
| ATOM   | 10    | C2        | DC         | A              | 1 | -2.987 | 2.043  | -1.780 | 1.00 | 0.00 | C |
| ATOM   | 11    | O2        | DC         | A              | 1 | -2.013 | 1.403  | -2.187 | 1.00 | 0.00 | O |
| ATOM   | 12    | N3        | DC         | A              | 1 | -3.081 | 3.398  | -1.880 | 1.00 | 0.00 | N |
| ATOM   | 13    | C4        | DC         | A              | 1 | -4.182 | 4.028  | -1.483 | 1.00 | 0.00 | C |
| ATOM   | 14    | N4        | DC         | A              | 1 | -4.194 | 5.373  | -1.556 | 1.00 | 0.00 | N |
| ATOM   | 15    | C5        | DC         | A              | 1 | -5.341 | 3.338  | -0.986 | 1.00 | 0.00 | C |
| ATOM   | 16    | C6        | DC         | A              | 1 | -5.231 | 1.993  | -0.845 | 1.00 | 0.00 | C |
| ATOM   | 17    | P         | DC         | A              | 2 | -2.643 | -3.339 | 1.103  | 1.00 | 0.00 | P |

|      |    |     |    |   |   |        |        |        |      |      |   |
|------|----|-----|----|---|---|--------|--------|--------|------|------|---|
| ATOM | 18 | OP2 | DC | A | 2 | -2.057 | -2.155 | 1.865  | 1.00 | 0.00 | O |
| ATOM | 19 | OP1 | DC | A | 2 | -3.308 | -4.372 | 1.988  | 1.00 | 0.00 | O |
| ATOM | 20 | O5' | DC | A | 2 | -1.508 | -4.086 | 0.204  | 1.00 | 0.00 | O |
| ATOM | 21 | C5' | DC | A | 2 | -1.186 | -3.812 | -1.170 | 1.00 | 0.00 | C |
| ATOM | 22 | C4' | DC | A | 2 | -0.074 | -2.794 | -1.350 | 1.00 | 0.00 | C |
| ATOM | 23 | O4' | DC | A | 2 | -0.587 | -1.454 | -1.196 | 1.00 | 0.00 | O |
| ATOM | 24 | C3' | DC | A | 2 | 1.114  | -2.936 | -0.357 | 1.00 | 0.00 | C |
| ATOM | 25 | O3' | DC | A | 2 | 2.321  | -2.997 | -1.154 | 1.00 | 0.00 | O |
| ATOM | 26 | C2' | DC | A | 2 | 0.966  | -1.680 | 0.500  | 1.00 | 0.00 | C |
| ATOM | 27 | C1' | DC | A | 2 | 0.442  | -0.703 | -0.548 | 1.00 | 0.00 | C |
| ATOM | 28 | N1' | DC | A | 2 | -0.115 | 0.547  | -0.043 | 1.00 | 0.00 | N |
| ATOM | 29 | C2  | DC | A | 2 | 0.349  | 1.805  | -0.586 | 1.00 | 0.00 | C |
| ATOM | 30 | O2  | DC | A | 2 | 1.251  | 1.794  | -1.417 | 1.00 | 0.00 | O |
| ATOM | 31 | N3  | DC | A | 2 | -0.214 | 2.953  | -0.120 | 1.00 | 0.00 | N |
| ATOM | 32 | C4  | DC | A | 2 | -1.240 | 2.908  | 0.721  | 1.00 | 0.00 | C |
| ATOM | 33 | N4  | DC | A | 2 | -1.787 | 4.068  | 1.126  | 1.00 | 0.00 | N |
| ATOM | 34 | C5  | DC | A | 2 | -1.719 | 1.674  | 1.276  | 1.00 | 0.00 | C |
| ATOM | 35 | C6  | DC | A | 2 | -1.117 | 0.511  | 0.850  | 1.00 | 0.00 | C |
| ATOM | 36 | P   | DA | A | 3 | 3.777  | -2.409 | -0.690 | 1.00 | 0.00 | P |
| ATOM | 37 | OP1 | DA | A | 3 | 4.803  | -2.955 | -1.657 | 1.00 | 0.00 | O |
| ATOM | 38 | OP2 | DA | A | 3 | 4.030  | -2.599 | 0.795  | 1.00 | 0.00 | O |
| ATOM | 39 | O5' | DA | A | 3 | 3.587  | -0.790 | -0.890 | 1.00 | 0.00 | O |
| ATOM | 40 | C5' | DA | A | 3 | 3.888  | -0.145 | -2.140 | 1.00 | 0.00 | C |
| ATOM | 41 | C4' | DA | A | 3 | 5.087  | 0.776  | -1.972 | 1.00 | 0.00 | C |
| ATOM | 42 | O4' | DA | A | 3 | 4.783  | 1.885  | -1.105 | 1.00 | 0.00 | O |
| ATOM | 43 | C3' | DA | A | 3 | 6.317  | 0.114  | -1.343 | 1.00 | 0.00 | C |
| ATOM | 44 | O3' | DA | A | 3 | 7.459  | 0.810  | -1.838 | 1.00 | 0.00 | O |
| ATOM | 45 | C2' | DA | A | 3 | 6.106  | 0.353  | 0.163  | 1.00 | 0.00 | C |
| ATOM | 46 | C1' | DA | A | 3 | 5.232  | 1.622  | 0.208  | 1.00 | 0.00 | C |
| ATOM | 47 | N9  | DA | A | 3 | 4.066  | 1.518  | 1.113  | 1.00 | 0.00 | N |
| ATOM | 48 | C8  | DA | A | 3 | 3.501  | 0.431  | 1.725  | 1.00 | 0.00 | C |
| ATOM | 49 | N7  | DA | A | 3 | 2.380  | 0.705  | 2.391  | 1.00 | 0.00 | N |
| ATOM | 50 | C5  | DA | A | 3 | 2.195  | 2.036  | 2.186  | 1.00 | 0.00 | C |
| ATOM | 51 | C6  | DA | A | 3 | 1.202  | 2.951  | 2.615  | 1.00 | 0.00 | C |
| ATOM | 52 | N6  | DA | A | 3 | 0.146  | 2.554  | 3.335  | 1.00 | 0.00 | N |
| ATOM | 53 | N1  | DA | A | 3 | 1.306  | 4.256  | 2.265  | 1.00 | 0.00 | N |
| ATOM | 54 | C2  | DA | A | 3 | 2.340  | 4.619  | 1.514  | 1.00 | 0.00 | C |
| ATOM | 55 | N3  | DA | A | 3 | 3.349  | 3.849  | 1.029  | 1.00 | 0.00 | N |
| ATOM | 56 | C4  | DA | A | 3 | 3.233  | 2.583  | 1.393  | 1.00 | 0.00 | C |
| END  |    |     |    |   |   |        |        |        |      |      |   |

| COMPND | CAA | /   | D-B3LYP | / | NA | MODEL  | /      | NEUTRAL |      |      |   |
|--------|-----|-----|---------|---|----|--------|--------|---------|------|------|---|
| ATOM   | 1   | O5' | DC      | A | 1  | -7.176 | -0.880 | -0.067  | 1.00 | 0.00 | O |
| ATOM   | 2   | C5' | DC      | A | 1  | -6.902 | -1.870 | -1.058  | 1.00 | 0.00 | C |
| ATOM   | 3   | C4' | DC      | A | 1  | -5.399 | -2.009 | -1.254  | 1.00 | 0.00 | C |
| ATOM   | 4   | O4' | DC      | A | 1  | -4.864 | -0.815 | -1.851  | 1.00 | 0.00 | O |
| ATOM   | 5   | C3' | DC      | A | 1  | -4.609 | -2.214 | 0.048   | 1.00 | 0.00 | C |
| ATOM   | 6   | O3' | DC      | A | 1  | -3.430 | -2.979 | -0.288  | 1.00 | 0.00 | O |
| ATOM   | 7   | C2' | DC      | A | 1  | -4.232 | -0.788 | 0.428   | 1.00 | 0.00 | C |
| ATOM   | 8   | C1' | DC      | A | 1  | -3.942 | -0.185 | -0.950  | 1.00 | 0.00 | C |
| ATOM   | 9   | N1  | DC      | A | 1  | -4.096 | 1.261  | -1.045  | 1.00 | 0.00 | N |
| ATOM   | 10  | C2  | DC      | A | 1  | -3.145 | 2.012  | -1.807  | 1.00 | 0.00 | C |
| ATOM   | 11  | O2  | DC      | A | 1  | -2.264 | 1.419  | -2.430  | 1.00 | 0.00 | O |
| ATOM   | 12  | N3  | DC      | A | 1  | -3.260 | 3.372  | -1.793  | 1.00 | 0.00 | N |
| ATOM   | 13  | C4  | DC      | A | 1  | -4.274 | 3.955  | -1.169  | 1.00 | 0.00 | C |
| ATOM   | 14  | N4  | DC      | A | 1  | -4.272 | 5.310  | -1.106  | 1.00 | 0.00 | N |
| ATOM   | 15  | C5  | DC      | A | 1  | -5.340 | 3.219  | -0.553  | 1.00 | 0.00 | C |
| ATOM   | 16  | C6  | DC      | A | 1  | -5.205 | 1.868  | -0.528  | 1.00 | 0.00 | C |
| ATOM   | 17  | P   | DA      | A | 2  | -2.551 | -3.648 | 0.923   | 1.00 | 0.00 | P |
| ATOM   | 18  | OP1 | DA      | A | 2  | -3.313 | -4.786 | 1.573   | 1.00 | 0.00 | O |
| ATOM   | 19  | OP2 | DA      | A | 2  | -2.053 | -2.593 | 1.902   | 1.00 | 0.00 | O |
| ATOM   | 20  | O5' | DA      | A | 2  | -1.309 | -4.256 | 0.064   | 1.00 | 0.00 | O |
| ATOM   | 21  | C5' | DA      | A | 2  | -0.959 | -3.984 | -1.302  | 1.00 | 0.00 | C |
| ATOM   | 22  | C4' | DA      | A | 2  | 0.178  | -2.983 | -1.439  | 1.00 | 0.00 | C |
| ATOM   | 23  | O4' | DA      | A | 2  | -0.318 | -1.637 | -1.307  | 1.00 | 0.00 | O |
| ATOM   | 24  | C3' | DA      | A | 2  | 1.302  | -3.144 | -0.386  | 1.00 | 0.00 | C |
| ATOM   | 25  | O3' | DA      | A | 2  | 2.547  | -3.036 | -1.106  | 1.00 | 0.00 | O |
| ATOM   | 26  | C2' | DA      | A | 2  | 1.041  | -1.967 | 0.549   | 1.00 | 0.00 | C |
| ATOM   | 27  | C1' | DA      | A | 2  | 0.573  | -0.912 | -0.446  | 1.00 | 0.00 | C |
| ATOM   | 28  | N9  | DA      | A | 2  | -0.126 | 0.210  | 0.117   | 1.00 | 0.00 | N |
| ATOM   | 29  | C8  | DA      | A | 2  | -1.057 | 0.187  | 1.131   | 1.00 | 0.00 | C |
| ATOM   | 30  | N7  | DA      | A | 2  | -1.563 | 1.371  | 1.407   | 1.00 | 0.00 | N |
| ATOM   | 31  | C5  | DA      | A | 2  | -0.915 | 2.223  | 0.528   | 1.00 | 0.00 | C |
| ATOM   | 32  | C6  | DA      | A | 2  | -1.005 | 3.608  | 0.312   | 1.00 | 0.00 | C |
| ATOM   | 33  | N6  | DA      | A | 2  | -1.862 | 4.392  | 1.031   | 1.00 | 0.00 | N |
| ATOM   | 34  | N1  | DA      | A | 2  | -0.184 | 4.176  | -0.590  | 1.00 | 0.00 | N |
| ATOM   | 35  | C2  | DA      | A | 2  | 0.664  | 3.381  | -1.264  | 1.00 | 0.00 | C |
| ATOM   | 36  | N3  | DA      | A | 2  | 0.811  | 2.053  | -1.186  | 1.00 | 0.00 | N |
| ATOM   | 37  | C4  | DA      | A | 2  | -0.011 | 1.526  | -0.274  | 1.00 | 0.00 | C |
| ATOM   | 38  | P   | DA      | A | 3  | 4.003  | -3.003 | -0.340  | 1.00 | 0.00 | P |
| ATOM   | 39  | OP1 | DA      | A | 3  | 4.938  | -3.933 | -1.081  | 1.00 | 0.00 | O |
| ATOM   | 40  | OP2 | DA      | A | 3  | 3.860  | -3.184 | 1.154   | 1.00 | 0.00 | O |
| ATOM   | 41  | O5' | DA      | A | 3  | 4.447  | -1.436 | -0.592  | 1.00 | 0.00 | O |
| ATOM   | 42  | C5' | DA      | A | 3  | 4.642  | -1.016 | -1.953  | 1.00 | 0.00 | C |
| ATOM   | 43  | C4' | DA      | A | 3  | 5.237  | 0.380  | -1.984  | 1.00 | 0.00 | C |
| ATOM   | 44  | O4' | DA      | A | 3  | 4.298  | 1.339  | -1.467  | 1.00 | 0.00 | O |
| ATOM   | 45  | C3' | DA      | A | 3  | 6.519  | 0.550  | -1.157  | 1.00 | 0.00 | C |
| ATOM   | 46  | O3' | DA      | A | 3  | 7.306  | 1.540  | -1.818  | 1.00 | 0.00 | O |
| ATOM   | 47  | C2' | DA      | A | 3  | 5.979  | 1.057  | 0.180   | 1.00 | 0.00 | C |
| ATOM   | 48  | C1' | DA      | A | 3  | 4.785  | 1.914  | -0.257  | 1.00 | 0.00 | C |
| ATOM   | 49  | N9  | DA      | A | 3  | 3.714  | 1.957  | 0.719   | 1.00 | 0.00 | N |
| ATOM   | 50  | C8  | DA      | A | 3  | 3.066  | 0.882  | 1.294   | 1.00 | 0.00 | C |
| ATOM   | 51  | N7  | DA      | A | 3  | 2.067  | 1.223  | 2.075   | 1.00 | 0.00 | N |
| ATOM   | 52  | C5  | DA      | A | 3  | 2.043  | 2.607  | 2.003   | 1.00 | 0.00 | C |
| ATOM   | 53  | C6  | DA      | A | 3  | 1.189  | 3.583  | 2.554   | 1.00 | 0.00 | C |
| ATOM   | 54  | N6  | DA      | A | 3  | 0.126  | 3.268  | 3.349   | 1.00 | 0.00 | N |
| ATOM   | 55  | N1  | DA      | A | 3  | 1.438  | 4.882  | 2.293   | 1.00 | 0.00 | N |
| ATOM   | 56  | C2  | DA      | A | 3  | 2.461  | 5.187  | 1.478   | 1.00 | 0.00 | C |
| ATOM   | 57  | N3  | DA      | A | 3  | 3.310  | 4.362  | 0.857   | 1.00 | 0.00 | N |
| ATOM   | 58  | C4  | DA      | A | 3  | 3.053  | 3.081  | 1.159   | 1.00 | 0.00 | C |
| END    |     |     |         |   |    |        |        |         |      |      |   |

| COMPND | CAA | /   | D-B3LYP | / | NA | MODEL  | /      | SINGLY IONIZED |      |      |   |
|--------|-----|-----|---------|---|----|--------|--------|----------------|------|------|---|
| ATOM   | 1   | O5' | DC      | A | 1  | -7.152 | 0.834  | 0.489          | 1.00 | 0.00 | O |
| ATOM   | 2   | C5' | DC      | A | 1  | -6.710 | 1.786  | 1.457          | 1.00 | 0.00 | C |
| ATOM   | 3   | C4' | DC      | A | 1  | -5.192 | 1.879  | 1.432          | 1.00 | 0.00 | C |
| ATOM   | 4   | O4' | DC      | A | 1  | -4.606 | 0.670  | 1.955          | 1.00 | 0.00 | O |
| ATOM   | 5   | C3' | DC      | A | 1  | -4.595 | 2.061  | 0.029          | 1.00 | 0.00 | C |
| ATOM   | 6   | O3' | DC      | A | 1  | -3.380 | 2.821  | 0.178          | 1.00 | 0.00 | O |
| ATOM   | 7   | C2' | DC      | A | 1  | -4.283 | 0.626  | -0.387         | 1.00 | 0.00 | C |
| ATOM   | 8   | C1' | DC      | A | 1  | -3.850 | 0.003  | 0.946          | 1.00 | 0.00 | C |
| ATOM   | 9   | N1  | DC      | A | 1  | -4.113 | -1.437 | 1.045          | 1.00 | 0.00 | N |
| ATOM   | 10  | C2  | DC      | A | 1  | -3.092 | -2.334 | 1.452          | 1.00 | 0.00 | C |
| ATOM   | 11  | O2  | DC      | A | 1  | -1.979 | -1.880 | 1.777          | 1.00 | 0.00 | O |
| ATOM   | 12  | N3  | DC      | A | 1  | -3.357 | -3.663 | 1.460          | 1.00 | 0.00 | N |
| ATOM   | 13  | C4  | DC      | A | 1  | -4.588 | -4.104 | 1.185          | 1.00 | 0.00 | C |
| ATOM   | 14  | N4  | DC      | A | 1  | -4.783 | -5.432 | 1.177          | 1.00 | 0.00 | N |
| ATOM   | 15  | C5  | DC      | A | 1  | -5.680 | -3.214 | 0.921          | 1.00 | 0.00 | C |

|        |     |     |         |   |     |        |        |                |      |      |   |
|--------|-----|-----|---------|---|-----|--------|--------|----------------|------|------|---|
| ATOM   | 16  | C6  | DC      | A | 1   | -5.390 | -1.887 | 0.861          | 1.00 | 0.00 | C |
| ATOM   | 17  | P   | DA      | A | 2   | -2.715 | 3.493  | -1.160         | 1.00 | 0.00 | P |
| ATOM   | 18  | OP2 | DA      | A | 2   | -2.143 | 2.430  | -2.091         | 1.00 | 0.00 | O |
| ATOM   | 19  | OP1 | DA      | A | 2   | -3.698 | 4.433  | -1.826         | 1.00 | 0.00 | O |
| ATOM   | 20  | O5' | DA      | A | 2   | -1.496 | 4.335  | -0.484         | 1.00 | 0.00 | O |
| ATOM   | 21  | C5' | DA      | A | 2   | -1.110 | 4.343  | 0.899          | 1.00 | 0.00 | C |
| ATOM   | 22  | C4' | DA      | A | 2   | 0.040  | 3.390  | 1.177          | 1.00 | 0.00 | C |
| ATOM   | 23  | O4' | DA      | A | 2   | -0.437 | 2.026  | 1.134          | 1.00 | 0.00 | O |
| ATOM   | 24  | C3' | DA      | A | 2   | 1.212  | 3.482  | 0.160          | 1.00 | 0.00 | C |
| ATOM   | 25  | O3' | DA      | A | 2   | 2.441  | 3.483  | 0.926          | 1.00 | 0.00 | O |
| ATOM   | 26  | C2' | DA      | A | 2   | 0.984  | 2.236  | -0.691         | 1.00 | 0.00 | C |
| ATOM   | 27  | C1' | DA      | A | 2   | 0.516  | 1.273  | 0.390          | 1.00 | 0.00 | C |
| ATOM   | 28  | N9  | DA      | A | 2   | -0.088 | 0.051  | -0.087         | 1.00 | 0.00 | N |
| ATOM   | 29  | C8  | DA      | A | 2   | -1.006 | -0.110 | -1.082         | 1.00 | 0.00 | C |
| ATOM   | 30  | N7  | DA      | A | 2   | -1.332 | -1.390 | -1.310         | 1.00 | 0.00 | N |
| ATOM   | 31  | C5  | DA      | A | 2   | -0.568 | -2.078 | -0.434         | 1.00 | 0.00 | C |
| ATOM   | 32  | C6  | DA      | A | 2   | -0.454 | -3.466 | -0.118         | 1.00 | 0.00 | C |
| ATOM   | 33  | N6  | DA      | A | 2   | -1.249 | -4.365 | -0.679         | 1.00 | 0.00 | N |
| ATOM   | 34  | N1  | DA      | A | 2   | 0.486  | -3.859 | 0.775          | 1.00 | 0.00 | N |
| ATOM   | 35  | C2  | DA      | A | 2   | 1.221  | -2.924 | 1.364          | 1.00 | 0.00 | C |
| ATOM   | 36  | N3  | DA      | A | 2   | 1.144  | -1.569 | 1.233          | 1.00 | 0.00 | N |
| ATOM   | 37  | C4  | DA      | A | 2   | 0.253  | -1.211 | 0.341          | 1.00 | 0.00 | C |
| ATOM   | 38  | P   | DA      | A | 3   | 3.835  | 2.712  | 0.536          | 1.00 | 0.00 | P |
| ATOM   | 39  | OP2 | DA      | A | 3   | 4.086  | 2.698  | -0.960         | 1.00 | 0.00 | O |
| ATOM   | 40  | OP1 | DA      | A | 3   | 4.915  | 3.271  | 1.433          | 1.00 | 0.00 | O |
| ATOM   | 41  | O5' | DA      | A | 3   | 3.509  | 1.151  | 0.925          | 1.00 | 0.00 | O |
| ATOM   | 42  | C5' | DA      | A | 3   | 3.779  | 0.598  | 2.222          | 1.00 | 0.00 | C |
| ATOM   | 43  | C4' | DA      | A | 3   | 4.850  | -0.477 | 2.109          | 1.00 | 0.00 | C |
| ATOM   | 44  | O4' | DA      | A | 3   | 4.369  | -1.616 | 1.374          | 1.00 | 0.00 | O |
| ATOM   | 45  | C3' | DA      | A | 3   | 6.117  | -0.024 | 1.372          | 1.00 | 0.00 | C |
| ATOM   | 46  | O3' | DA      | A | 3   | 7.199  | -0.788 | 1.903          | 1.00 | 0.00 | O |
| ATOM   | 47  | C2' | DA      | A | 3   | 5.815  | -0.397 | -0.087         | 1.00 | 0.00 | C |
| ATOM   | 48  | C1' | DA      | A | 3   | 4.885  | -1.615 | 0.048          | 1.00 | 0.00 | C |
| ATOM   | 49  | N9  | DA      | A | 3   | 3.786  | -1.638 | -0.917         | 1.00 | 0.00 | N |
| ATOM   | 50  | C8  | DA      | A | 3   | 3.083  | -0.595 | -1.491         | 1.00 | 0.00 | C |
| ATOM   | 51  | N7  | DA      | A | 3   | 2.054  | -0.983 | -2.214         | 1.00 | 0.00 | N |
| ATOM   | 52  | C5  | DA      | A | 3   | 2.067  | -2.363 | -2.103         | 1.00 | 0.00 | C |
| ATOM   | 53  | C6  | DA      | A | 3   | 1.263  | -3.385 | -2.657         | 1.00 | 0.00 | C |
| ATOM   | 54  | N6  | DA      | A | 3   | 0.209  | -3.126 | -3.464         | 1.00 | 0.00 | N |
| ATOM   | 55  | N1  | DA      | A | 3   | 1.562  | -4.670 | -2.371         | 1.00 | 0.00 | N |
| ATOM   | 56  | C2  | DA      | A | 3   | 2.610  | -4.921 | -1.572         | 1.00 | 0.00 | C |
| ATOM   | 57  | N3  | DA      | A | 3   | 3.448  | -4.052 | -0.990         | 1.00 | 0.00 | N |
| ATOM   | 58  | C4  | DA      | A | 3   | 3.134  | -2.788 | -1.300         | 1.00 | 0.00 | C |
| END    |     |     |         |   |     |        |        |                |      |      |   |
| COMPND | ACC | /   | D-B3LYP | / | PO- | MODEL  | /      | NEUTRAL        |      |      |   |
| ATOM   | 1   | O5' | DA      | A | 1   | -7.224 | -0.279 | 0.355          | 1.00 | 0.00 | O |
| ATOM   | 2   | C5' | DA      | A | 1   | -7.076 | -1.356 | -0.567         | 1.00 | 0.00 | C |
| ATOM   | 3   | C4' | DA      | A | 1   | -5.601 | -1.677 | -0.764         | 1.00 | 0.00 | C |
| ATOM   | 4   | O4' | DA      | A | 1   | -4.928 | -0.564 | -1.384         | 1.00 | 0.00 | O |
| ATOM   | 5   | C3' | DA      | A | 1   | -4.822 | -1.961 | 0.531          | 1.00 | 0.00 | C |
| ATOM   | 6   | O3' | DA      | A | 1   | -3.740 | -2.832 | 0.180          | 1.00 | 0.00 | O |
| ATOM   | 7   | C2' | DA      | A | 1   | -4.312 | -0.571 | 0.898          | 1.00 | 0.00 | C |
| ATOM   | 8   | C1' | DA      | A | 1   | -3.949 | -0.034 | -0.484         | 1.00 | 0.00 | C |
| ATOM   | 9   | N9  | DA      | A | 1   | -3.925 | 1.413  | -0.575         | 1.00 | 0.00 | N |
| ATOM   | 10  | C8  | DA      | A | 1   | -4.587 | 2.342  | 0.203          | 1.00 | 0.00 | C |
| ATOM   | 11  | N7  | DA      | A | 1   | -4.220 | 3.584  | -0.022         | 1.00 | 0.00 | N |
| ATOM   | 12  | C5  | DA      | A | 1   | -3.265 | 3.471  | -1.019         | 1.00 | 0.00 | C |
| ATOM   | 13  | C6  | DA      | A | 1   | -2.423 | 4.410  | -1.645         | 1.00 | 0.00 | C |
| ATOM   | 14  | N6  | DA      | A | 1   | -2.389 | 5.713  | -1.254         | 1.00 | 0.00 | N |
| ATOM   | 15  | N1  | DA      | A | 1   | -1.575 | 3.989  | -2.600         | 1.00 | 0.00 | N |
| ATOM   | 16  | C2  | DA      | A | 1   | -1.520 | 2.673  | -2.864         | 1.00 | 0.00 | C |
| ATOM   | 17  | N3  | DA      | A | 1   | -2.218 | 1.677  | -2.301         | 1.00 | 0.00 | N |
| ATOM   | 18  | C4  | DA      | A | 1   | -3.071 | 2.136  | -1.381         | 1.00 | 0.00 | C |
| ATOM   | 19  | P   | DC      | A | 2   | -2.733 | -3.422 | 1.361          | 1.00 | 0.00 | P |
| ATOM   | 20  | OP2 | DC      | A | 2   | -2.002 | -2.291 | 2.054          | 1.00 | 0.00 | O |
| ATOM   | 21  | OP1 | DC      | A | 2   | -3.468 | -4.432 | 2.199          | 1.00 | 0.00 | O |
| ATOM   | 22  | O5' | DC      | A | 2   | -1.709 | -4.253 | 0.374          | 1.00 | 0.00 | O |
| ATOM   | 23  | C5' | DC      | A | 2   | -1.410 | -3.939 | -0.988         | 1.00 | 0.00 | C |
| ATOM   | 24  | C4' | DC      | A | 2   | -0.260 | -2.964 | -1.188         | 1.00 | 0.00 | C |
| ATOM   | 25  | O4' | DC      | A | 2   | -0.705 | -1.604 | -1.030         | 1.00 | 0.00 | O |
| ATOM   | 26  | C3' | DC      | A | 2   | 0.946  | -3.156 | -0.229         | 1.00 | 0.00 | C |
| ATOM   | 27  | O3' | DC      | A | 2   | 2.114  | -3.314 | -1.049         | 1.00 | 0.00 | O |
| ATOM   | 28  | C2' | DC      | A | 2   | 0.941  | -1.857 | 0.579          | 1.00 | 0.00 | C |
| ATOM   | 29  | C1' | DC      | A | 2   | 0.389  | -0.880 | -0.455         | 1.00 | 0.00 | C |
| ATOM   | 30  | N1  | DC      | A | 2   | -0.091 | 0.395  | 0.049          | 1.00 | 0.00 | N |
| ATOM   | 31  | C2  | DC      | A | 2   | 0.414  | 1.609  | -0.513         | 1.00 | 0.00 | C |
| ATOM   | 32  | O2  | DC      | A | 2   | 1.228  | 1.561  | -1.437         | 1.00 | 0.00 | O |
| ATOM   | 33  | N3  | DC      | A | 2   | -0.036 | 2.786  | 0.014          | 1.00 | 0.00 | N |
| ATOM   | 34  | C4  | DC      | A | 2   | -0.950 | 2.789  | 0.974          | 1.00 | 0.00 | C |
| ATOM   | 35  | N4  | DC      | A | 2   | -1.370 | 3.996  | 1.445          | 1.00 | 0.00 | N |
| ATOM   | 36  | C5  | DC      | A | 2   | -1.472 | 1.587  | 1.555          | 1.00 | 0.00 | C |
| ATOM   | 37  | C6  | DC      | A | 2   | -1.013 | 0.410  | 1.051          | 1.00 | 0.00 | C |
| ATOM   | 38  | P   | DC      | A | 3   | 3.613  | -3.430 | -0.340         | 1.00 | 0.00 | P |
| ATOM   | 39  | OP1 | DC      | A | 3   | 4.451  | -4.272 | -1.261         | 1.00 | 0.00 | O |
| ATOM   | 40  | OP2 | DC      | A | 3   | 3.479  | -3.701 | 1.131          | 1.00 | 0.00 | O |
| ATOM   | 41  | O5' | DC      | A | 3   | 4.110  | -1.838 | -0.459         | 1.00 | 0.00 | O |
| ATOM   | 42  | C5' | DC      | A | 3   | 4.354  | -1.319 | -1.769         | 1.00 | 0.00 | C |
| ATOM   | 43  | C4' | DC      | A | 3   | 5.305  | -0.135 | -1.711         | 1.00 | 0.00 | C |
| ATOM   | 44  | O4' | DC      | A | 3   | 4.651  | 1.024  | -1.160         | 1.00 | 0.00 | O |
| ATOM   | 45  | C3' | DC      | A | 3   | 6.556  | -0.367 | -0.851         | 1.00 | 0.00 | C |
| ATOM   | 46  | O3' | DC      | A | 3   | 7.621  | 0.367  | -1.456         | 1.00 | 0.00 | O |
| ATOM   | 47  | C2' | DC      | A | 3   | 6.144  | 0.235  | 0.494          | 1.00 | 0.00 | C |
| ATOM   | 48  | C1' | DC      | A | 3   | 5.263  | 1.416  | 0.067          | 1.00 | 0.00 | C |
| ATOM   | 49  | N1  | DC      | A | 3   | 4.205  | 1.752  | 1.022          | 1.00 | 0.00 | N |
| ATOM   | 50  | C2  | DC      | A | 3   | 4.122  | 3.064  | 1.576          | 1.00 | 0.00 | C |
| ATOM   | 51  | O2  | DC      | A | 3   | 5.009  | 3.886  | 1.326          | 1.00 | 0.00 | O |
| ATOM   | 52  | N3  | DC      | A | 3   | 3.044  | 3.350  | 2.367          | 1.00 | 0.00 | N |
| ATOM   | 53  | C4  | DC      | A | 3   | 2.135  | 2.418  | 2.627          | 1.00 | 0.00 | C |
| ATOM   | 54  | N4  | DC      | A | 3   | 1.095  | 2.751  | 3.434          | 1.00 | 0.00 | N |
| ATOM   | 55  | C5  | DC      | A | 3   | 2.215  | 1.081  | 2.117          | 1.00 | 0.00 | C |
| ATOM   | 56  | C6  | DC      | A | 3   | 3.254  | 0.811  | 1.288          | 1.00 | 0.00 | C |
| END    |     |     |         |   |     |        |        |                |      |      |   |
| COMPND | ACC | /   | D-B3LYP | / | PO- | MODEL  | /      | SINGLY IONIZED |      |      |   |
| ATOM   | 1   | O5' | DA      | A | 1   | -7.135 | 0.513  | -0.429         | 1.00 | 0.00 | O |
| ATOM   | 2   | C5' | DA      | A | 1   | -6.977 | 1.615  | 0.463          | 1.00 | 0.00 | C |
| ATOM   | 3   | C4' | DA      | A | 1   | -5.502 | 1.922  | 0.668          | 1.00 | 0.00 | C |
| ATOM   | 4   | O4' | DA      | A | 1   | -4.854 | 0.840  | 1.378          | 1.00 | 0.00 | O |
| ATOM   | 5   | C3' | DA      | A | 1   | -4.684 | 2.106  | -0.618         | 1.00 | 0.00 | C |
| ATOM   | 6   | O3' | DA      | A | 1   | -3.581 | 2.956  | -0.289         | 1.00 | 0.00 | O |
| ATOM   | 7   | C2' | DA      | A | 1   | -4.210 | 0.682  | -0.899         | 1.00 | 0.00 | C |
| ATOM   | 8   | C1' | DA      | A | 1   | -3.944 | 0.173  | 0.521          | 1.00 | 0.00 | C |
| ATOM   | 9   | N9  | DA      | A | 1   | -4.147 | -1.275 | 0.645          | 1.00 | 0.00 | N |
| ATOM   | 10  | C8  | DA      | A | 1   | -5.219 | -1.995 | 0.221          | 1.00 | 0.00 | C |
| ATOM   | 11  | N7  | DA      | A | 1   | -5.104 | -3.317 | 0.427          | 1.00 | 0.00 | N |
| ATOM   | 12  | C5  | DA      | A | 1   | -3.900 | -3.447 | 1.018          | 1.00 | 0.00 | C |
| ATOM   | 13  | C6  | DA      | A | 1   | -3.173 | -4.578 | 1.510          | 1.00 | 0.00 | C |



|        |     |     |         |   |     |        |        |                |      |      |   |
|--------|-----|-----|---------|---|-----|--------|--------|----------------|------|------|---|
| ATOM   | 14  | N6  | DA      | A | 1   | -3.642 | -5.810 | 1.397          | 1.00 | 0.00 | N |
| ATOM   | 15  | N1  | DA      | A | 1   | -1.971 | -4.376 | 2.110          | 1.00 | 0.00 | N |
| ATOM   | 16  | C2  | DA      | A | 1   | -1.522 | -3.136 | 2.217          | 1.00 | 0.00 | C |
| ATOM   | 17  | N3  | DA      | A | 1   | -2.126 | -1.968 | 1.809          | 1.00 | 0.00 | N |
| ATOM   | 18  | C4  | DA      | A | 1   | -3.269 | -2.184 | 1.204          | 1.00 | 0.00 | C |
| ATOM   | 19  | P   | DC      | A | 2   | -2.575 | 3.488  | -1.500         | 1.00 | 0.00 | P |
| ATOM   | 20  | OP1 | DC      | A | 2   | -3.298 | 4.484  | -2.364         | 1.00 | 0.00 | O |
| ATOM   | 21  | OP2 | DC      | A | 2   | -1.887 | 2.311  | -2.163         | 1.00 | 0.00 | O |
| ATOM   | 22  | O5' | DC      | A | 2   | -1.506 | 4.314  | -0.561         | 1.00 | 0.00 | O |
| ATOM   | 23  | C5' | DC      | A | 2   | -1.271 | 4.129  | 0.838          | 1.00 | 0.00 | C |
| ATOM   | 24  | C4' | DC      | A | 2   | -0.125 | 3.184  | 1.162          | 1.00 | 0.00 | C |
| ATOM   | 25  | O4' | DC      | A | 2   | -0.557 | 1.807  | 1.077          | 1.00 | 0.00 | O |
| ATOM   | 26  | C3' | DC      | A | 2   | 1.121  | 3.322  | 0.241          | 1.00 | 0.00 | C |
| ATOM   | 27  | O3' | DC      | A | 2   | 2.269  | 3.433  | 1.102          | 1.00 | 0.00 | O |
| ATOM   | 28  | C2' | DC      | A | 2   | 1.051  | 2.029  | -0.575         | 1.00 | 0.00 | C |
| ATOM   | 29  | C1' | DC      | A | 2   | 0.525  | 1.077  | 0.491          | 1.00 | 0.00 | C |
| ATOM   | 30  | N1  | DC      | A | 2   | 0.038  | -0.211 | 0.019          | 1.00 | 0.00 | N |
| ATOM   | 31  | C2  | DC      | A | 2   | 0.522  | -1.406 | 0.623          | 1.00 | 0.00 | C |
| ATOM   | 32  | O2  | DC      | A | 2   | 1.294  | -1.357 | 1.578          | 1.00 | 0.00 | O |
| ATOM   | 33  | N3  | DC      | A | 2   | 0.081  | -2.603 | 0.113          | 1.00 | 0.00 | N |
| ATOM   | 34  | C4  | DC      | A | 2   | -0.853 | -2.627 | -0.840         | 1.00 | 0.00 | C |
| ATOM   | 35  | N4  | DC      | A | 2   | -1.358 | -3.835 | -1.159         | 1.00 | 0.00 | N |
| ATOM   | 36  | C5  | DC      | A | 2   | -1.359 | -1.441 | -1.452         | 1.00 | 0.00 | C |
| ATOM   | 37  | C6  | DC      | A | 2   | -0.883 | -0.253 | -0.980         | 1.00 | 0.00 | C |
| ATOM   | 38  | P   | DC      | A | 3   | 3.793  | 2.975  | 0.630          | 1.00 | 0.00 | P |
| ATOM   | 39  | OP2 | DC      | A | 3   | 3.972  | 3.164  | -0.852         | 1.00 | 0.00 | O |
| ATOM   | 40  | OP1 | DC      | A | 3   | 4.735  | 3.548  | 1.651          | 1.00 | 0.00 | O |
| ATOM   | 41  | O5' | DC      | A | 3   | 3.671  | 1.330  | 0.848          | 1.00 | 0.00 | O |
| ATOM   | 42  | C5' | DC      | A | 3   | 4.045  | 0.703  | 2.078          | 1.00 | 0.00 | C |
| ATOM   | 43  | C4' | DC      | A | 3   | 5.218  | -0.241 | 1.848          | 1.00 | 0.00 | C |
| ATOM   | 44  | O4' | DC      | A | 3   | 4.796  | -1.400 | 1.103          | 1.00 | 0.00 | O |
| ATOM   | 45  | C3' | DC      | A | 3   | 6.365  | 0.385  | 1.044          | 1.00 | 0.00 | C |
| ATOM   | 46  | O3' | DC      | A | 3   | 7.576  | -0.223 | 1.498          | 1.00 | 0.00 | O |
| ATOM   | 47  | C2' | DC      | A | 3   | 6.026  | -0.024 | -0.393         | 1.00 | 0.00 | C |
| ATOM   | 48  | C1' | DC      | A | 3   | 5.376  | -1.404 | -0.201         | 1.00 | 0.00 | C |
| ATOM   | 49  | N1  | DC      | A | 3   | 4.327  | -1.731 | -1.174         | 1.00 | 0.00 | N |
| ATOM   | 50  | C2  | DC      | A | 3   | 4.346  | -2.993 | -1.846         | 1.00 | 0.00 | C |
| ATOM   | 51  | O2  | DC      | A | 3   | 5.321  | -3.738 | -1.710         | 1.00 | 0.00 | O |
| ATOM   | 52  | N3  | DC      | A | 3   | 3.265  | -3.323 | -2.616         | 1.00 | 0.00 | N |
| ATOM   | 53  | C4  | DC      | A | 3   | 2.251  | -2.474 | -2.746         | 1.00 | 0.00 | C |
| ATOM   | 54  | N4  | DC      | A | 3   | 1.203  | -2.849 | -3.513         | 1.00 | 0.00 | N |
| ATOM   | 55  | C5  | DC      | A | 3   | 2.220  | -1.189 | -2.112         | 1.00 | 0.00 | C |
| ATOM   | 56  | C6  | DC      | A | 3   | 3.269  | -0.882 | -1.307         | 1.00 | 0.00 | C |
| END    |     |     |         |   |     |        |        |                |      |      |   |
| COMPND | AAC | /   | D-B3LYP | / | PO- | MODEL  | /      | NEUTRAL        |      |      |   |
| ATOM   | 1   | O5' | DA      | A | 1   | -7.334 | -0.465 | 0.195          | 1.00 | 0.00 | O |
| ATOM   | 2   | C5' | DA      | A | 1   | -6.960 | -1.328 | -0.874         | 1.00 | 0.00 | C |
| ATOM   | 3   | C4' | DA      | A | 1   | -5.448 | -1.466 | -0.908         | 1.00 | 0.00 | C |
| ATOM   | 4   | O4' | DA      | A | 1   | -4.854 | -0.211 | -1.305         | 1.00 | 0.00 | O |
| ATOM   | 5   | C3' | DA      | A | 1   | -4.819 | -1.827 | 0.453          | 1.00 | 0.00 | C |
| ATOM   | 6   | O3' | DA      | A | 1   | -3.690 | -2.669 | 0.192          | 1.00 | 0.00 | O |
| ATOM   | 7   | C2' | DA      | A | 1   | -4.363 | -0.462 | 0.968          | 1.00 | 0.00 | C |
| ATOM   | 8   | C1' | DA      | A | 1   | -3.866 | 0.148  | -0.336         | 1.00 | 0.00 | C |
| ATOM   | 9   | N9  | DA      | A | 1   | -3.709 | 1.586  | -0.322         | 1.00 | 0.00 | N |
| ATOM   | 10  | C8  | DA      | A | 1   | -4.080 | 2.492  | 0.648          | 1.00 | 0.00 | C |
| ATOM   | 11  | N7  | DA      | A | 1   | -3.687 | 3.723  | 0.407          | 1.00 | 0.00 | N |
| ATOM   | 12  | C5  | DA      | A | 1   | -3.012 | 3.624  | -0.799         | 1.00 | 0.00 | C |
| ATOM   | 13  | C6  | DA      | A | 1   | -2.303 | 4.561  | -1.576         | 1.00 | 0.00 | C |
| ATOM   | 14  | N6  | DA      | A | 1   | -2.160 | 5.857  | -1.193         | 1.00 | 0.00 | N |
| ATOM   | 15  | N1  | DA      | A | 1   | -1.695 | 4.139  | -2.702         | 1.00 | 0.00 | N |
| ATOM   | 16  | C2  | DA      | A | 1   | -1.768 | 2.834  | -3.016         | 1.00 | 0.00 | C |
| ATOM   | 17  | N3  | DA      | A | 1   | -2.393 | 1.848  | -2.363         | 1.00 | 0.00 | N |
| ATOM   | 18  | C4  | DA      | A | 1   | -3.002 | 2.306  | -1.261         | 1.00 | 0.00 | C |
| ATOM   | 19  | P   | DA      | A | 2   | -2.967 | -3.437 | 1.471          | 1.00 | 0.00 | P |
| ATOM   | 20  | OP1 | DA      | A | 2   | -3.945 | -4.399 | 2.091          | 1.00 | 0.00 | O |
| ATOM   | 21  | OP2 | DA      | A | 2   | -2.258 | -2.436 | 2.360          | 1.00 | 0.00 | O |
| ATOM   | 22  | O5' | DA      | A | 2   | -1.818 | -4.275 | 0.639          | 1.00 | 0.00 | O |
| ATOM   | 23  | C5' | DA      | A | 2   | -1.611 | -4.290 | -0.774         | 1.00 | 0.00 | C |
| ATOM   | 24  | C4' | DA      | A | 2   | -0.421 | -3.439 | -1.191         | 1.00 | 0.00 | C |
| ATOM   | 25  | O4' | DA      | A | 2   | -0.767 | -2.035 | -1.151         | 1.00 | 0.00 | O |
| ATOM   | 26  | C3' | DA      | A | 2   | 0.828  | -3.613 | -0.288         | 1.00 | 0.00 | C |
| ATOM   | 27  | O3' | DA      | A | 2   | 1.972  | -3.669 | -1.161         | 1.00 | 0.00 | O |
| ATOM   | 28  | C2' | DA      | A | 2   | 0.757  | -2.355 | 0.575          | 1.00 | 0.00 | C |
| ATOM   | 29  | C1' | DA      | A | 2   | 0.281  | -1.349 | -0.462         | 1.00 | 0.00 | C |
| ATOM   | 30  | N9  | DA      | A | 2   | -0.206 | -0.103 | 0.079          | 1.00 | 0.00 | N |
| ATOM   | 31  | C8  | DA      | A | 2   | -1.014 | 0.072  | 1.183          | 1.00 | 0.00 | C |
| ATOM   | 32  | N7  | DA      | A | 2   | -1.160 | 1.338  | 1.522          | 1.00 | 0.00 | N |
| ATOM   | 33  | C5  | DA      | A | 2   | -0.388 | 2.028  | 0.602          | 1.00 | 0.00 | C |
| ATOM   | 34  | C6  | DA      | A | 2   | -0.086 | 3.394  | 0.442          | 1.00 | 0.00 | C |
| ATOM   | 35  | N6  | DA      | A | 2   | -0.632 | 4.359  | 1.235          | 1.00 | 0.00 | N |
| ATOM   | 36  | N1  | DA      | A | 2   | 0.795  | 3.752  | -0.511         | 1.00 | 0.00 | N |
| ATOM   | 37  | C2  | DA      | A | 2   | 1.312  | 2.792  | -1.297         | 1.00 | 0.00 | C |
| ATOM   | 38  | N3  | DA      | A | 2   | 1.070  | 1.478  | -1.280         | 1.00 | 0.00 | N |
| ATOM   | 39  | C4  | DA      | A | 2   | 0.220  | 1.151  | -0.298         | 1.00 | 0.00 | C |
| ATOM   | 40  | P   | DC      | A | 3   | 3.502  | -3.239 | -0.681         | 1.00 | 0.00 | P |
| ATOM   | 41  | OP1 | DC      | A | 3   | 4.434  | -3.793 | -1.724         | 1.00 | 0.00 | O |
| ATOM   | 42  | OP2 | DC      | A | 3   | 3.684  | -3.478 | 0.794          | 1.00 | 0.00 | O |
| ATOM   | 43  | O5' | DC      | A | 3   | 3.404  | -1.587 | -0.845         | 1.00 | 0.00 | O |
| ATOM   | 44  | C5' | DC      | A | 3   | 3.835  | -0.916 | -2.031         | 1.00 | 0.00 | C |
| ATOM   | 45  | C4' | DC      | A | 3   | 5.069  | -0.070 | -1.745         | 1.00 | 0.00 | C |
| ATOM   | 46  | O4' | DC      | A | 3   | 4.728  | 1.064  | -0.927         | 1.00 | 0.00 | O |
| ATOM   | 47  | C3' | DC      | A | 3   | 6.173  | -0.819 | -0.987         | 1.00 | 0.00 | C |
| ATOM   | 48  | O3' | DC      | A | 3   | 7.421  | -0.254 | -1.400         | 1.00 | 0.00 | O |
| ATOM   | 49  | C2' | DC      | A | 3   | 5.859  | -0.489 | 0.478          | 1.00 | 0.00 | C |
| ATOM   | 50  | C1' | DC      | A | 3   | 5.281  | 0.932  | 0.384          | 1.00 | 0.00 | C |
| ATOM   | 51  | N1  | DC      | A | 3   | 4.237  | 1.258  | 1.362          | 1.00 | 0.00 | N |
| ATOM   | 52  | C2  | DC      | A | 3   | 4.225  | 2.560  | 1.956          | 1.00 | 0.00 | C |
| ATOM   | 53  | O2  | DC      | A | 3   | 5.204  | 3.299  | 1.816          | 1.00 | 0.00 | O |
| ATOM   | 54  | N3  | DC      | A | 3   | 3.108  | 2.938  | 2.649          | 1.00 | 0.00 | N |
| ATOM   | 55  | C4  | DC      | A | 3   | 2.088  | 2.098  | 2.791          | 1.00 | 0.00 | C |
| ATOM   | 56  | N4  | DC      | A | 3   | 0.992  | 2.531  | 3.468          | 1.00 | 0.00 | N |
| ATOM   | 57  | C5  | DC      | A | 3   | 2.100  | 0.766  | 2.266          | 1.00 | 0.00 | C |
| ATOM   | 58  | C6  | DC      | A | 3   | 3.173  | 0.416  | 1.515          | 1.00 | 0.00 | C |
| END    |     |     |         |   |     |        |        |                |      |      |   |
| COMPND | AAC | /   | D-B3LYP | / | PO- | MODEL  | /      | SINGLY IONIZED |      |      |   |
| ATOM   | 1   | O5' | DA      | A | 1   | -7.277 | 0.884  | -0.165         | 1.00 | 0.00 | O |
| ATOM   | 2   | C5' | DA      | A | 1   | -7.075 | -0.129 | -1.143         | 1.00 | 0.00 | C |
| ATOM   | 3   | C4' | DA      | A | 1   | -5.651 | -0.650 | -1.053         | 1.00 | 0.00 | C |
| ATOM   | 4   | O4' | DA      | A | 1   | -4.725 | 0.380  | -1.479         | 1.00 | 0.00 | O |
| ATOM   | 5   | C3' | DA      | A | 1   | -5.209 | -1.052 | 0.371          | 1.00 | 0.00 | C |
| ATOM   | 6   | O3' | DA      | A | 1   | -4.299 | -2.149 | 0.224          | 1.00 | 0.00 | O |
| ATOM   | 7   | C2' | DA      | A | 1   | -4.477 | 0.206  | 0.838          | 1.00 | 0.00 | C |
| ATOM   | 8   | C1' | DA      | A | 1   | -3.748 | 0.542  | -0.456         | 1.00 | 0.00 | C |
| ATOM   | 9   | N9  | DA      | A | 1   | -3.199 | 1.887  | -0.512         | 1.00 | 0.00 | N |
| ATOM   | 10  | C8  | DA      | A | 1   | -3.359 | 2.918  | 0.384          | 1.00 | 0.00 | C |
| ATOM   | 11  | N7  | DA      | A | 1   | -2.621 | 3.985  | 0.120          | 1.00 | 0.00 | N |

|      |    |     |    |   |   |        |        |        |      |      |   |
|------|----|-----|----|---|---|--------|--------|--------|------|------|---|
| ATOM | 12 | C5  | DA | A | 1 | -1.930 | 3.628  | -1.002 | 1.00 | 0.00 | C |
| ATOM | 13 | C6  | DA | A | 1 | -0.953 | 4.305  | -1.783 | 1.00 | 0.00 | C |
| ATOM | 14 | N6  | DA | A | 1 | -0.560 | 5.546  | -1.481 | 1.00 | 0.00 | N |
| ATOM | 15 | N1  | DA | A | 1 | -0.405 | 3.657  | -2.832 | 1.00 | 0.00 | N |
| ATOM | 16 | C2  | DA | A | 1 | -0.818 | 2.412  | -3.099 | 1.00 | 0.00 | C |
| ATOM | 17 | N3  | DA | A | 1 | -1.744 | 1.668  | -2.460 | 1.00 | 0.00 | N |
| ATOM | 18 | C4  | DA | A | 1 | -2.261 | 2.319  | -1.424 | 1.00 | 0.00 | C |
| ATOM | 19 | F   | DA | A | 2 | -3.608 | -2.865 | 1.550  | 1.00 | 0.00 | P |
| ATOM | 20 | OP2 | DA | A | 2 | -2.702 | -1.886 | 2.272  | 1.00 | 0.00 | O |
| ATOM | 21 | OP1 | DA | A | 2 | -4.654 | -3.600 | 2.341  | 1.00 | 0.00 | O |
| ATOM | 22 | O5' | DA | A | 2 | -2.681 | -3.971 | 0.753  | 1.00 | 0.00 | O |
| ATOM | 23 | C5' | DA | A | 2 | -2.385 | -3.985 | -0.645 | 1.00 | 0.00 | C |
| ATOM | 24 | C4' | DA | A | 2 | -1.082 | -3.290 | -1.000 | 1.00 | 0.00 | C |
| ATOM | 25 | O4' | DA | A | 2 | -1.243 | -1.850 | -0.935 | 1.00 | 0.00 | O |
| ATOM | 26 | C3' | DA | A | 2 | 0.120  | -3.645 | -0.081 | 1.00 | 0.00 | C |
| ATOM | 27 | O3' | DA | A | 2 | 1.242  | -3.905 | -0.944 | 1.00 | 0.00 | O |
| ATOM | 28 | C2' | DA | A | 2 | 0.249  | -2.376 | 0.761  | 1.00 | 0.00 | C |
| ATOM | 29 | C1' | DA | A | 2 | -0.078 | -1.340 | -0.302 | 1.00 | 0.00 | C |
| ATOM | 30 | N9  | DA | A | 2 | -0.314 | -0.002 | 0.210  | 1.00 | 0.00 | N |
| ATOM | 31 | C8  | DA | A | 2 | -1.066 | 0.375  | 1.290  | 1.00 | 0.00 | C |
| ATOM | 32 | N7  | DA | A | 2 | -0.900 | 1.656  | 1.631  | 1.00 | 0.00 | N |
| ATOM | 33 | C5  | DA | A | 2 | 0.015  | 2.122  | 0.736  | 1.00 | 0.00 | C |
| ATOM | 34 | C6  | DA | A | 2 | 0.723  | 3.352  | 0.617  | 1.00 | 0.00 | C |
| ATOM | 35 | N6  | DA | A | 2 | 0.418  | 4.412  | 1.360  | 1.00 | 0.00 | N |
| ATOM | 36 | N1  | DA | A | 2 | 1.727  | 3.446  | -0.288 | 1.00 | 0.00 | N |
| ATOM | 37 | C2  | DA | A | 2 | 1.969  | 2.402  | -1.075 | 1.00 | 0.00 | C |
| ATOM | 38 | N3  | DA | A | 2 | 1.340  | 1.199  | -1.098 | 1.00 | 0.00 | N |
| ATOM | 39 | C4  | DA | A | 2 | 0.415  | 1.107  | -0.165 | 1.00 | 0.00 | C |
| ATOM | 40 | F   | DC | A | 3 | 2.825  | -3.646 | -0.512 | 1.00 | 0.00 | P |
| ATOM | 41 | OP1 | DC | A | 3 | 3.654  | -4.362 | -1.541 | 1.00 | 0.00 | O |
| ATOM | 42 | OP2 | DC | A | 3 | 3.013  | -3.823 | 0.970  | 1.00 | 0.00 | O |
| ATOM | 43 | O5' | DC | A | 3 | 2.932  | -2.003 | -0.762 | 1.00 | 0.00 | O |
| ATOM | 44 | C5' | DC | A | 3 | 3.332  | -1.456 | -2.022 | 1.00 | 0.00 | C |
| ATOM | 45 | C4' | DC | A | 3 | 4.642  | -0.698 | -1.871 | 1.00 | 0.00 | C |
| ATOM | 46 | O4' | DC | A | 3 | 4.449  | 0.499  | -1.091 | 1.00 | 0.00 | O |
| ATOM | 47 | C3' | DC | A | 3 | 5.738  | -1.497 | -1.152 | 1.00 | 0.00 | C |
| ATOM | 48 | O3' | DC | A | 3 | 6.990  | -1.067 | -1.691 | 1.00 | 0.00 | O |
| ATOM | 49 | C2' | DC | A | 3 | 5.571  | -1.061 | 0.308  | 1.00 | 0.00 | C |
| ATOM | 50 | C1' | DC | A | 3 | 5.109  | 0.398  | 0.169  | 1.00 | 0.00 | C |
| ATOM | 51 | N1  | DC | A | 3 | 4.188  | 0.856  | 1.218  | 1.00 | 0.00 | N |
| ATOM | 52 | C2  | DC | A | 3 | 4.412  | 2.123  | 1.857  | 1.00 | 0.00 | C |
| ATOM | 53 | O2  | DC | A | 3 | 5.445  | 2.746  | 1.609  | 1.00 | 0.00 | O |
| ATOM | 54 | N3  | DC | A | 3 | 3.450  | 2.586  | 2.709  | 1.00 | 0.00 | N |
| ATOM | 55 | C4  | DC | A | 3 | 2.357  | 1.869  | 2.943  | 1.00 | 0.00 | C |
| ATOM | 56 | N4  | DC | A | 3 | 1.421  | 2.385  | 3.771  | 1.00 | 0.00 | N |
| ATOM | 57 | C5  | DC | A | 3 | 2.126  | 0.584  | 2.350  | 1.00 | 0.00 | C |
| ATOM | 58 | C6  | DC | A | 3 | 3.062  | 0.136  | 1.471  | 1.00 | 0.00 | C |
| END  |    |     |    |   |   |        |        |        |      |      |   |

| COMPND | CCA / | D-B3LYP / | PO- | MODEL / | NEUTRAL |        |        |        |      |      |   |
|--------|-------|-----------|-----|---------|---------|--------|--------|--------|------|------|---|
| ATOM   | 1     | O5'       | DC  | A       | 1       | -7.303 | -0.945 | 0.089  | 1.00 | 0.00 | O |
| ATOM   | 2     | C5'       | DC  | A       | 1       | -6.980 | -1.985 | -0.834 | 1.00 | 0.00 | C |
| ATOM   | 3     | C4'       | DC  | A       | 1       | -5.470 | -2.090 | -0.995 | 1.00 | 0.00 | C |
| ATOM   | 4     | O4'       | DC  | A       | 1       | -4.961 | -0.920 | -1.662 | 1.00 | 0.00 | O |
| ATOM   | 5     | C3'       | DC  | A       | 1       | -4.693 | -2.193 | 0.328  | 1.00 | 0.00 | C |
| ATOM   | 6     | O3'       | DC  | A       | 1       | -3.505 | -2.955 | 0.065  | 1.00 | 0.00 | O |
| ATOM   | 7     | C2'       | DC  | A       | 1       | -4.353 | -0.734 | 0.617  | 1.00 | 0.00 | C |
| ATOM   | 8     | C1'       | DC  | A       | 1       | -4.067 | -0.210 | -0.792 | 1.00 | 0.00 | C |
| ATOM   | 9     | N1        | DC  | A       | 1       | -4.272 | 1.224  | -0.968 | 1.00 | 0.00 | N |
| ATOM   | 10    | C2        | DC  | A       | 1       | -3.291 | 1.994  | -1.668 | 1.00 | 0.00 | C |
| ATOM   | 11    | O2        | DC  | A       | 1       | -2.343 | 1.420  | -2.207 | 1.00 | 0.00 | O |
| ATOM   | 12    | N3        | DC  | A       | 1       | -3.455 | 3.349  | -1.696 | 1.00 | 0.00 | N |
| ATOM   | 13    | C4        | DC  | A       | 1       | -4.553 | 3.902  | -1.192 | 1.00 | 0.00 | C |
| ATOM   | 14    | N4        | DC  | A       | 1       | -4.628 | 5.252  | -1.189 | 1.00 | 0.00 | N |
| ATOM   | 15    | C5        | DC  | A       | 1       | -5.637 | 3.135  | -0.648 | 1.00 | 0.00 | C |
| ATOM   | 16    | C6        | DC  | A       | 1       | -5.443 | 1.794  | -0.560 | 1.00 | 0.00 | C |
| ATOM   | 17    | F         | DC  | A       | 2       | -2.587 | -3.461 | 1.353  | 1.00 | 0.00 | P |
| ATOM   | 18    | OP1       | DC  | A       | 2       | -3.310 | -4.555 | 2.093  | 1.00 | 0.00 | O |
| ATOM   | 19    | OP2       | DC  | A       | 2       | -2.074 | -2.271 | 2.136  | 1.00 | 0.00 | O |
| ATOM   | 20    | O5'       | DC  | A       | 2       | -1.362 | -4.161 | 0.505  | 1.00 | 0.00 | O |
| ATOM   | 21    | C5'       | DC  | A       | 2       | -0.991 | -3.912 | -0.855 | 1.00 | 0.00 | C |
| ATOM   | 22    | C4'       | DC  | A       | 2       | 0.145  | -2.912 | -1.024 | 1.00 | 0.00 | C |
| ATOM   | 23    | O4'       | DC  | A       | 2       | -0.358 | -1.563 | -1.003 | 1.00 | 0.00 | O |
| ATOM   | 24    | C3'       | DC  | A       | 2       | 1.247  | -2.991 | 0.062  | 1.00 | 0.00 | C |
| ATOM   | 25    | O3'       | DC  | A       | 2       | 2.510  | -2.957 | -0.623 | 1.00 | 0.00 | O |
| ATOM   | 26    | C2'       | DC  | A       | 2       | 0.990  | -1.726 | 0.879  | 1.00 | 0.00 | C |
| ATOM   | 27    | C1'       | DC  | A       | 2       | 0.562  | -0.772 | -0.230 | 1.00 | 0.00 | C |
| ATOM   | 28    | N1        | DC  | A       | 2       | -0.097 | 0.462  | 0.160  | 1.00 | 0.00 | N |
| ATOM   | 29    | O2        | DC  | A       | 2       | 0.272  | 1.687  | -0.478 | 1.00 | 0.00 | O |
| ATOM   | 30    | O2        | DC  | A       | 2       | 1.169  | 1.689  | -1.323 | 1.00 | 0.00 | O |
| ATOM   | 31    | N3        | DC  | A       | 2       | -0.383 | 2.824  | -0.098 | 1.00 | 0.00 | N |
| ATOM   | 32    | C4        | DC  | A       | 2       | -1.360 | 2.769  | 0.791  | 1.00 | 0.00 | C |
| ATOM   | 33    | N4        | DC  | A       | 2       | -1.946 | 3.948  | 1.161  | 1.00 | 0.00 | N |
| ATOM   | 34    | C5        | DC  | A       | 2       | -1.778 | 1.554  | 1.417  | 1.00 | 0.00 | C |
| ATOM   | 35    | C6        | DC  | A       | 2       | -1.118 | 0.420  | 1.059  | 1.00 | 0.00 | C |
| ATOM   | 36    | F         | DA  | A       | 3       | 3.933  | -3.190 | 0.203  | 1.00 | 0.00 | P |
| ATOM   | 37    | OP1       | DA  | A       | 3       | 4.589  | -4.430 | -0.340 | 1.00 | 0.00 | O |
| ATOM   | 38    | OP2       | DA  | A       | 3       | 3.737  | -2.960 | 1.677  | 1.00 | 0.00 | O |
| ATOM   | 39    | O5'       | DA  | A       | 3       | 4.756  | -1.853 | -0.340 | 1.00 | 0.00 | O |
| ATOM   | 40    | C5'       | DA  | A       | 3       | 4.953  | -1.689 | -1.742 | 1.00 | 0.00 | C |
| ATOM   | 41    | C4'       | DA  | A       | 3       | 5.586  | -0.332 | -2.004 | 1.00 | 0.00 | C |
| ATOM   | 42    | O4'       | DA  | A       | 3       | 4.678  | 0.719  | -1.621 | 1.00 | 0.00 | O |
| ATOM   | 43    | C3'       | DA  | A       | 3       | 6.885  | -0.067 | -1.231 | 1.00 | 0.00 | C |
| ATOM   | 44    | O3'       | DA  | A       | 3       | 7.676  | 0.805  | -2.039 | 1.00 | 0.00 | O |
| ATOM   | 45    | C2'       | DA  | A       | 3       | 6.381  | 0.632  | 0.031  | 1.00 | 0.00 | C |
| ATOM   | 46    | C1'       | DA  | A       | 3       | 5.182  | 1.432  | -0.494 | 1.00 | 0.00 | C |
| ATOM   | 47    | N9        | DA  | A       | 3       | 4.129  | 1.608  | 0.490  | 1.00 | 0.00 | N |
| ATOM   | 48    | C8        | DA  | A       | 3       | 3.507  | 0.632  | 1.246  | 1.00 | 0.00 | C |
| ATOM   | 49    | N7        | DA  | A       | 3       | 2.529  | 1.091  | 1.994  | 1.00 | 0.00 | N |
| ATOM   | 50    | C5        | DA  | A       | 3       | 2.495  | 2.445  | 1.711  | 1.00 | 0.00 | C |
| ATOM   | 51    | C6        | DA  | A       | 3       | 1.648  | 3.486  | 2.136  | 1.00 | 0.00 | C |
| ATOM   | 52    | N6        | DA  | A       | 3       | 0.646  | 3.286  | 3.040  | 1.00 | 0.00 | N |
| ATOM   | 53    | N1        | DA  | A       | 3       | 1.855  | 4.728  | 1.654  | 1.00 | 0.00 | N |
| ATOM   | 54    | C2        | DA  | A       | 3       | 2.847  | 4.908  | 0.766  | 1.00 | 0.00 | C |
| ATOM   | 55    | N3        | DA  | A       | 3       | 3.698  | 4.005  | 0.263  | 1.00 | 0.00 | N |
| ATOM   | 56    | C4        | DA  | A       | 3       | 3.470  | 2.785  | 0.769  | 1.00 | 0.00 | C |
| END    |       |           |     |         |         |        |        |        |      |      |   |

| COMPND | CCA / | D-B3LYP / | PO- | MODEL / | SINGLY IONIZED |        |        |        |      |      |   |
|--------|-------|-----------|-----|---------|----------------|--------|--------|--------|------|------|---|
| ATOM   | 1     | O5'       | DC  | A       | 1              | -7.234 | -0.406 | 0.138  | 1.00 | 0.00 | O |
| ATOM   | 2     | C5'       | DC  | A       | 1              | -7.023 | -1.552 | -0.686 | 1.00 | 0.00 | C |
| ATOM   | 3     | C4'       | DC  | A       | 1              | -5.535 | -1.838 | -0.817 | 1.00 | 0.00 | C |
| ATOM   | 4     | O4'       | DC  | A       | 1              | -4.891 | -0.794 | -1.573 | 1.00 | 0.00 | O |
| ATOM   | 5     | C3'       | DC  | A       | 1              | -4.772 | -1.916 | 0.517  | 1.00 | 0.00 | C |
| ATOM   | 6     | O3'       | DC  | A       | 1              | -3.672 | -2.811 | 0.308  | 1.00 | 0.00 | O |
| ATOM   | 7     | C2'       | DC  | A       | 1              | -4.287 | -0.481 | 0.687  | 1.00 | 0.00 | C |
| ATOM   | 8     | C1'       | DC  | A       | 1              | -3.920 | -0.126 | -0.756 | 1.00 | 0.00 | C |
| ATOM   | 9     | N1        | DC  | A       | 1              | -3.951 | 1.301  | -1.061 | 1.00 | 0.00 | N |

|      |    |     |    |   |   |        |        |        |      |      |   |
|------|----|-----|----|---|---|--------|--------|--------|------|------|---|
| ATOM | 10 | C2  | DC | A | 1 | -2.861 | 1.902  | -1.765 | 1.00 | 0.00 | C |
| ATOM | 11 | O2  | DC | A | 1 | -1.929 | 1.191  | -2.153 | 1.00 | 0.00 | O |
| ATOM | 12 | N3  | DC | A | 1 | -2.897 | 3.250  | -1.958 | 1.00 | 0.00 | N |
| ATOM | 13 | C4  | DC | A | 1 | -3.961 | 3.954  | -1.584 | 1.00 | 0.00 | C |
| ATOM | 14 | N4  | DC | A | 1 | -3.916 | 5.292  | -1.751 | 1.00 | 0.00 | N |
| ATOM | 15 | C5  | DC | A | 1 | -5.137 | 3.354  | -1.017 | 1.00 | 0.00 | C |
| ATOM | 16 | C6  | DC | A | 1 | -5.080 | 2.018  | -0.781 | 1.00 | 0.00 | C |
| ATOM | 17 | F   | DC | A | 2 | -2.698 | -3.257 | 1.572  | 1.00 | 0.00 | F |
| ATOM | 18 | OP2 | DC | A | 2 | -2.054 | -2.037 | 2.203  | 1.00 | 0.00 | O |
| ATOM | 19 | OP1 | DC | A | 2 | -3.419 | -4.230 | 2.463  | 1.00 | 0.00 | O |
| ATOM | 20 | O5' | DC | A | 2 | -1.579 | -4.100 | 0.707  | 1.00 | 0.00 | O |
| ATOM | 21 | C5' | DC | A | 2 | -1.309 | -3.984 | -0.693 | 1.00 | 0.00 | C |
| ATOM | 22 | C4' | DC | A | 2 | -0.143 | -3.068 | -1.028 | 1.00 | 0.00 | C |
| ATOM | 23 | O4' | DC | A | 2 | -0.561 | -1.683 | -1.012 | 1.00 | 0.00 | O |
| ATOM | 24 | C3' | DC | A | 2 | 1.072  | -3.180 | -0.067 | 1.00 | 0.00 | C |
| ATOM | 25 | O3' | DC | A | 2 | 2.247  | -3.319 | -0.889 | 1.00 | 0.00 | O |
| ATOM | 26 | C2' | DC | A | 2 | 0.978  | -1.866 | 0.707  | 1.00 | 0.00 | C |
| ATOM | 27 | C1' | DC | A | 2 | 0.499  | -0.941 | -0.405 | 1.00 | 0.00 | C |
| ATOM | 28 | N1  | DC | A | 2 | -0.008 | 0.363  | 0.016  | 1.00 | 0.00 | N |
| ATOM | 29 | C2  | DC | A | 2 | 0.494  | 1.564  | -0.616 | 1.00 | 0.00 | C |
| ATOM | 30 | O2  | DC | A | 2 | 1.374  | 1.463  | -1.466 | 1.00 | 0.00 | O |
| ATOM | 31 | N3  | DC | A | 2 | -0.011 | 2.763  | -0.215 | 1.00 | 0.00 | N |
| ATOM | 32 | C4  | DC | A | 2 | -1.021 | 2.814  | 0.644  | 1.00 | 0.00 | C |
| ATOM | 33 | N4  | DC | A | 2 | -1.512 | 4.020  | 0.986  | 1.00 | 0.00 | N |
| ATOM | 34 | C5  | DC | A | 2 | -1.541 | 1.639  | 1.281  | 1.00 | 0.00 | C |
| ATOM | 35 | C6  | DC | A | 2 | -0.997 | 0.425  | 0.920  | 1.00 | 0.00 | C |
| ATOM | 36 | F   | DA | A | 3 | 3.759  | -2.803 | -0.458 | 1.00 | 0.00 | F |
| ATOM | 37 | OP1 | DA | A | 3 | 4.702  | -3.437 | -1.442 | 1.00 | 0.00 | O |
| ATOM | 38 | OP2 | DA | A | 3 | 3.964  | -2.884 | -1.036 | 1.00 | 0.00 | O |
| ATOM | 39 | O5' | DA | A | 3 | 3.630  | -1.179 | -0.764 | 1.00 | 0.00 | O |
| ATOM | 40 | C5' | DA | A | 3 | 3.924  | -0.642 | -2.057 | 1.00 | 0.00 | C |
| ATOM | 41 | C4' | DA | A | 3 | 5.168  | 0.229  | -1.986 | 1.00 | 0.00 | C |
| ATOM | 42 | O4' | DA | A | 3 | 4.942  | 1.414  | -1.194 | 1.00 | 0.00 | O |
| ATOM | 43 | C3' | DA | A | 3 | 6.374  | -0.452 | -1.333 | 1.00 | 0.00 | C |
| ATOM | 44 | O3' | DA | A | 3 | 7.545  | 0.134  | -1.901 | 1.00 | 0.00 | O |
| ATOM | 45 | C2' | DA | A | 3 | 6.214  | -0.090 | 0.157  | 1.00 | 0.00 | C |
| ATOM | 46 | C1' | DA | A | 3 | 5.394  | 1.215  | 0.128  | 1.00 | 0.00 | C |
| ATOM | 47 | N9  | DA | A | 3 | 4.238  | 1.218  | 1.053  | 1.00 | 0.00 | N |
| ATOM | 48 | C8  | DA | A | 3 | 3.630  | 0.195  | 1.732  | 1.00 | 0.00 | C |
| ATOM | 49 | N7  | DA | A | 3 | 2.535  | 0.562  | 2.395  | 1.00 | 0.00 | N |
| ATOM | 50 | C5  | DA | A | 3 | 2.410  | 1.885  | 2.115  | 1.00 | 0.00 | C |
| ATOM | 51 | C6  | DA | A | 3 | 1.463  | 2.867  | 2.496  | 1.00 | 0.00 | C |
| ATOM | 52 | N6  | DA | A | 3 | 0.396  | 2.558  | 3.244  | 1.00 | 0.00 | N |
| ATOM | 53 | N1  | DA | A | 3 | 1.621  | 4.144  | 2.070  | 1.00 | 0.00 | N |
| ATOM | 54 | C2  | DA | A | 3 | 2.663  | 4.414  | 1.291  | 1.00 | 0.00 | C |
| ATOM | 55 | N3  | DA | A | 3 | 3.630  | 3.572  | 0.842  | 1.00 | 0.00 | N |
| ATOM | 56 | C4  | DA | A | 3 | 3.461  | 2.335  | 1.280  | 1.00 | 0.00 | C |
| END  |    |     |    |   |   |        |        |        |      |      |   |

| COMPND | CAA | /   | D-B3LYP | / | PO- | MODEL  | /      | NEUTRAL |      |      |   |
|--------|-----|-----|---------|---|-----|--------|--------|---------|------|------|---|
| ATOM   | 1   | O5' | DC      | A | 1   | -7.203 | -0.623 | 0.231   | 1.00 | 0.00 | O |
| ATOM   | 2   | C5' | DC      | A | 1   | -7.004 | -1.710 | -0.672  | 1.00 | 0.00 | C |
| ATOM   | 3   | C4' | DC      | A | 1   | -5.515 | -1.952 | -0.879  | 1.00 | 0.00 | C |
| ATOM   | 4   | O4' | DC      | A | 1   | -4.928 | -0.842 | -1.582  | 1.00 | 0.00 | O |
| ATOM   | 5   | C3' | DC      | A | 1   | -4.707 | -2.101 | 0.420   | 1.00 | 0.00 | C |
| ATOM   | 6   | O3' | DC      | A | 1   | -3.588 | -2.954 | 0.131   | 1.00 | 0.00 | O |
| ATOM   | 7   | C2' | DC      | A | 1   | -4.243 | -0.671 | 0.676   | 1.00 | 0.00 | C |
| ATOM   | 8   | C1' | DC      | A | 1   | -3.949 | -0.201 | -0.751  | 1.00 | 0.00 | C |
| ATOM   | 9   | N1  | DC      | A | 1   | -4.019 | 1.240  | -0.962  | 1.00 | 0.00 | N |
| ATOM   | 10  | C2  | DC      | A | 1   | -3.034 | 1.875  | -1.782  | 1.00 | 0.00 | C |
| ATOM   | 11  | O2  | DC      | A | 1   | -2.194 | 1.189  | -2.365  | 1.00 | 0.00 | O |
| ATOM   | 12  | N3  | DC      | A | 1   | -3.070 | 3.237  | -1.871  | 1.00 | 0.00 | N |
| ATOM   | 13  | C4  | DC      | A | 1   | -4.041 | 3.924  | -1.286  | 1.00 | 0.00 | C |
| ATOM   | 14  | N4  | DC      | A | 1   | -3.959 | 5.278  | -1.326  | 1.00 | 0.00 | N |
| ATOM   | 15  | C5  | DC      | A | 1   | -5.140 | 3.301  | -0.608  | 1.00 | 0.00 | C |
| ATOM   | 16  | C6  | DC      | A | 1   | -5.083 | 1.949  | -0.483  | 1.00 | 0.00 | C |
| ATOM   | 17  | F   | DA      | A | 2   | -2.730 | -3.583 | 1.405   | 1.00 | 0.00 | F |
| ATOM   | 18  | OP1 | DA      | A | 2   | -3.542 | -4.659 | 2.075   | 1.00 | 0.00 | O |
| ATOM   | 19  | OP2 | DA      | A | 2   | -2.149 | -2.473 | 2.255   | 1.00 | 0.00 | O |
| ATOM   | 20  | O5' | DA      | A | 2   | -1.518 | -4.302 | 0.553   | 1.00 | 0.00 | O |
| ATOM   | 21  | C5' | DA      | A | 2   | -1.206 | -4.162 | -0.835  | 1.00 | 0.00 | C |
| ATOM   | 22  | C4' | DA      | A | 2   | 0.021  | -3.295 | -1.095  | 1.00 | 0.00 | C |
| ATOM   | 23  | O4' | DA      | A | 2   | -0.334 | -1.895 | -1.108  | 1.00 | 0.00 | O |
| ATOM   | 24  | C3' | DA      | A | 2   | 1.146  | -3.452 | -0.048  | 1.00 | 0.00 | C |
| ATOM   | 25  | O3' | DA      | A | 2   | 2.383  | -3.482 | -0.775  | 1.00 | 0.00 | O |
| ATOM   | 26  | C2' | DA      | A | 2   | 0.965  | -2.195 | 0.800   | 1.00 | 0.00 | C |
| ATOM   | 27  | C1' | DA      | A | 2   | 0.584  | -1.181 | -0.269  | 1.00 | 0.00 | C |
| ATOM   | 28  | N9  | DA      | A | 2   | -0.053 | 0.019  | 0.209   | 1.00 | 0.00 | N |
| ATOM   | 29  | C8  | DA      | A | 2   | -0.383 | 0.119  | 1.220   | 1.00 | 0.00 | C |
| ATOM   | 30  | N7  | DA      | A | 2   | -1.420 | 1.346  | 1.412   | 1.00 | 0.00 | N |
| ATOM   | 31  | C5  | DA      | A | 2   | -0.728 | 2.097  | 0.477   | 1.00 | 0.00 | C |
| ATOM   | 32  | C6  | DA      | A | 2   | -0.742 | 3.466  | 0.166   | 1.00 | 0.00 | C |
| ATOM   | 33  | N6  | DA      | A | 2   | -1.545 | 4.347  | 0.837   | 1.00 | 0.00 | N |
| ATOM   | 34  | N1  | DA      | A | 2   | 0.099  | 3.923  | -0.780  | 1.00 | 0.00 | N |
| ATOM   | 35  | C2  | DA      | A | 2   | 0.895  | 3.036  | -1.400  | 1.00 | 0.00 | C |
| ATOM   | 36  | N3  | DA      | A | 2   | 0.974  | 1.713  | -1.227  | 1.00 | 0.00 | N |
| ATOM   | 37  | C4  | DA      | A | 2   | 0.132  | 1.295  | -0.275  | 1.00 | 0.00 | C |
| ATOM   | 38  | F   | DA      | A | 3   | 3.853  | -3.502 | -0.001  | 1.00 | 0.00 | F |
| ATOM   | 39  | OP1 | DA      | A | 3   | 4.713  | -4.500 | -0.727  | 1.00 | 0.00 | O |
| ATOM   | 40  | OP2 | DA      | A | 3   | 3.677  | -3.510 | 1.491   | 1.00 | 0.00 | O |
| ATOM   | 41  | O5' | DA      | A | 3   | 4.369  | -1.964 | -0.383  | 1.00 | 0.00 | O |
| ATOM   | 42  | C5' | DA      | A | 3   | 4.568  | -1.666 | -1.765  | 1.00 | 0.00 | C |
| ATOM   | 43  | C4' | DA      | A | 3   | 5.296  | -0.342 | -1.915  | 1.00 | 0.00 | C |
| ATOM   | 44  | O4' | DA      | A | 3   | 4.465  | 0.747  | -1.470  | 1.00 | 0.00 | O |
| ATOM   | 45  | C3' | DA      | A | 3   | 6.596  | -0.236 | -1.106  | 1.00 | 0.00 | C |
| ATOM   | 46  | O3' | DA      | A | 3   | 7.469  | 0.629  | -1.835  | 1.00 | 0.00 | O |
| ATOM   | 47  | C2' | DA      | A | 3   | 6.120  | 0.407  | 0.197   | 1.00 | 0.00 | C |
| ATOM   | 48  | C1' | DA      | A | 3   | 4.998  | 1.335  | -0.287  | 1.00 | 0.00 | C |
| ATOM   | 49  | N9  | DA      | A | 3   | 3.934  | 1.516  | 0.683   | 1.00 | 0.00 | N |
| ATOM   | 50  | C8  | DA      | A | 3   | 3.212  | 0.532  | 1.330   | 1.00 | 0.00 | C |
| ATOM   | 51  | N7  | DA      | A | 3   | 2.235  | 0.999  | 2.075   | 1.00 | 0.00 | N |
| ATOM   | 52  | C5  | DA      | A | 3   | 2.304  | 2.371  | 1.899   | 1.00 | 0.00 | C |
| ATOM   | 53  | C6  | DA      | A | 3   | 1.515  | 3.440  | 2.368   | 1.00 | 0.00 | C |
| ATOM   | 54  | N6  | DA      | A | 3   | 0.434  | 3.256  | 3.180   | 1.00 | 0.00 | N |
| ATOM   | 55  | N1  | DA      | A | 3   | 1.849  | 4.697  | 2.010   | 1.00 | 0.00 | N |
| ATOM   | 56  | C2  | DA      | A | 3   | 2.893  | 4.870  | 1.184   | 1.00 | 0.00 | C |
| ATOM   | 57  | N3  | DA      | A | 3   | 3.690  | 3.946  | 0.636   | 1.00 | 0.00 | N |
| ATOM   | 58  | C4  | DA      | A | 3   | 3.348  | 2.712  | 1.031   | 1.00 | 0.00 | C |
| END    |     |     |         |   |     |        |        |         |      |      |   |

| COMPND | CAA | /   | D-B3LYP | / | PO- | MODEL  | /      | SINGLY IONIZED |      |      |   |
|--------|-----|-----|---------|---|-----|--------|--------|----------------|------|------|---|
| ATOM   | 1   | O5' | DC      | A | 1   | -7.105 | -0.754 | -0.217         | 1.00 | 0.00 | O |
| ATOM   | 2   | C5' | DC      | A | 1   | -6.688 | -1.783 | -1.115         | 1.00 | 0.00 | C |
| ATOM   | 3   | C4' | DC      | A | 1   | -5.173 | -1.909 | -1.089         | 1.00 | 0.00 | C |
| ATOM   | 4   | O4' | DC      | A | 1   | -4.565 | -0.750 | -1.694         | 1.00 | 0.00 | O |
| ATOM   | 5   | C3' | DC      | A | 1   | -4.567 | -2.015 | 0.319          | 1.00 | 0.00 | C |
| ATOM   | 6   | O3' | DC      | A | 1   | -3.373 | -2.801 | 0.218          | 1.00 | 0.00 | O |
| ATOM   | 7   | C2' | DC      | A | 1   | -4.226 | -0.561 | 0.640          | 1.00 | 0.00 | C |
